# Supplementary material for: Human adipose microRNA-221 is upregulated in obesity and affects fat metabolism downstream of leptin and TNF-α
Source: Springer Nature journal article supplement (doi:10.1007/s00125-013-2950-9), 2013-06-11
Supplement: MOESM1 [file 8091660]

# ESM Fig 1

**a**

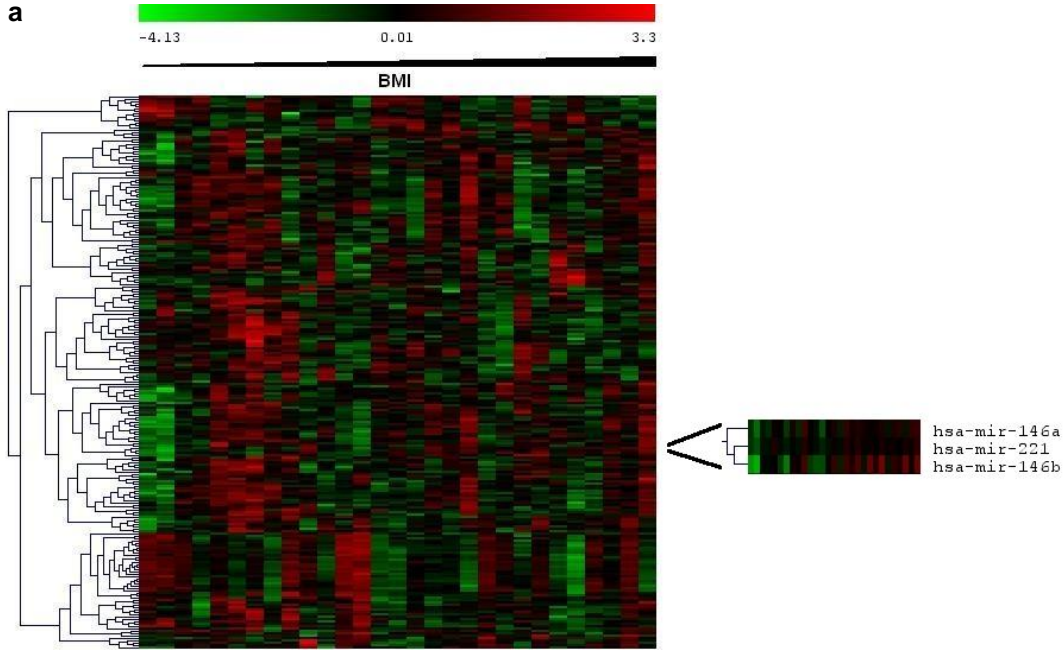

**b**

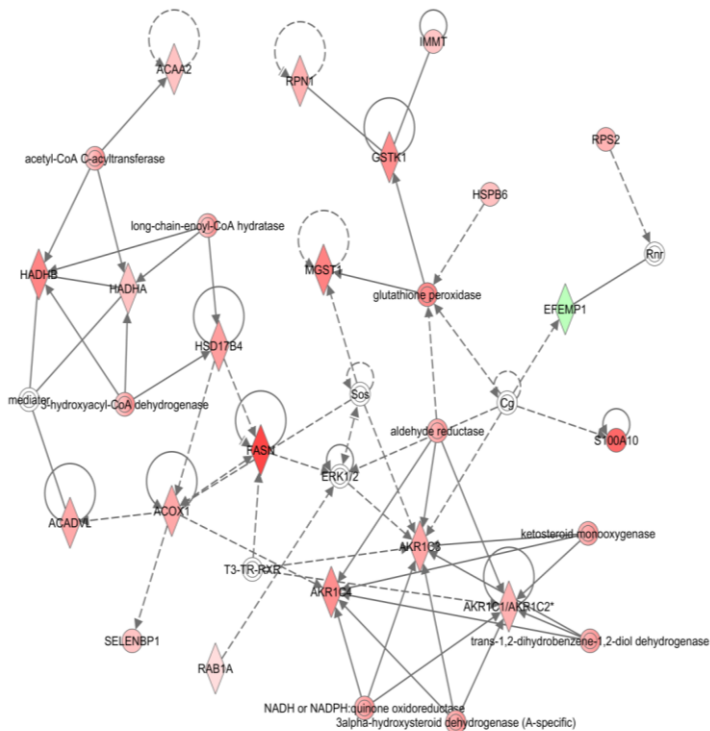

**c**

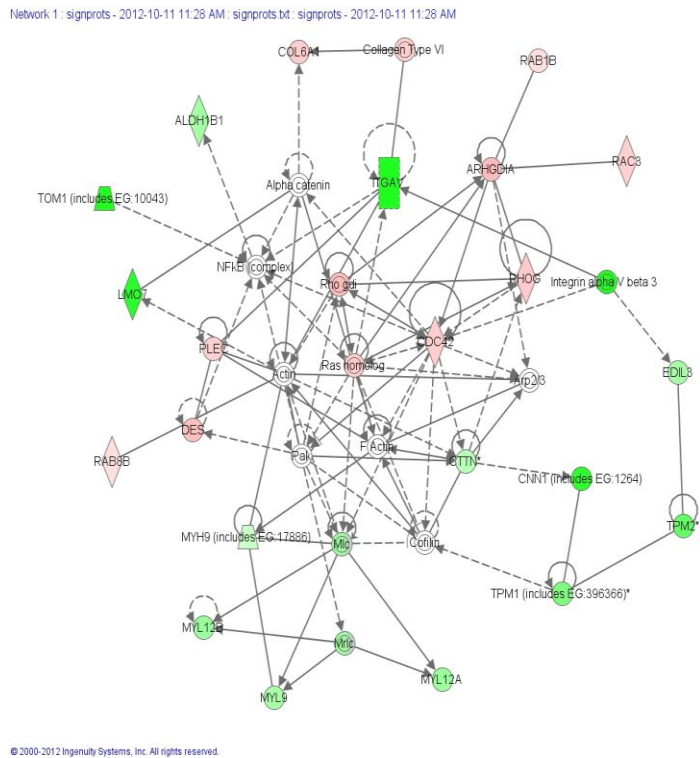

## ESM Fig 1: Graphical representations of miRNA array and proteomic analysis results

**a)** Hierarchical clustering of expression of 233 miRNAs in adipose tissue from 29 Pima subjects sorted by BMI. Data is normalised to the mean expression level for each miRNA. Color scale represents change in expression level compared to the mean, in log<sub>2</sub>. Enlarged is a cluster of 3 microRNAs up-regulated in obese subjects, miRs-146a, b and miR-221.

**b-c)** Protein interaction networks showing the most upregulation (**b**) and downregulation (**c**) following overexpression of miR-221 in cultured adipocytes (Ingenuity).
