# Supplementary material for: Human adipose microRNA-221 is upregulated in obesity and affects fat metabolism downstream of leptin and TNF-α
Source: Springer Nature journal article supplement (doi:10.1007/s00125-013-2950-9), 2013-06-11
Supplement: MOESM3 [file 8091660]

## Sheet: Sheet1
QPCR primer list (F-forward, R-reverse)
FASN-F	CATCCAGATAGGCCTCATAGAC
FASN-R	CTCCATGAAGTAGGAGTGGAAG
AKR1C1-F	TTGGTGCAATTCCCATCGAC
AKR1C1-R	GGGGTTCGCTTGTGCTTTTT
AKR1C2-F	AAGCCGGGTTCCACCATATT
AKR1C2-R	TGACATTCCACCTGGTTGCA
AKR1C3-F	AAGCTGGGTTCCGCCATATA
AKR1C3-R	TGCCTGCGGTTGAAGTTTGA
AKR1C4-F	GACGCCACTACCAAAAGATG
AKR1C4-R	CTGATCCGCTGCTCATTGTA
GAPDH-F	ACCCACTCCTCCACCTTTG
GAPDH-R	CTCTTGTGCTCTTGCTGGG
HADHA-F	CAAGGGCTTCCTAGGTCGTAAAT
HADHA-R	GGAACTGGATGTCTTCGTCTGAT
HADHB-F	CACCTGAGCTCCCTGCGGTT
HADHB-R	TCGGTCTGCAGAGTGGCCCAT
