# Supplementary material for: Human adipose microRNA-221 is upregulated in obesity and affects fat metabolism downstream of leptin and TNF-α
Source: Springer Nature journal article supplement (doi:10.1007/s00125-013-2950-9), 2013-06-11
Supplement: MOESM4 [file 8091660]

## Sheet: all detected proteins
ID	NAME	Annotation	T1ToSTD	T2ToSTD	T3ToSTD	U1ToSTD	U2ToSTD	U3ToSTD	Tave	Uave	T-U
Q15019	2012-09-02	Septin-2 OS=Homo sapiens GN=SEPT2 PE=1 SV=1	0.442304	0.807293	0.835564	0.481652	0.472184	1.59831	0.695054	0.850716	-0.155662
Q9NVA2	2012-09-11	Septin-11 OS=Homo sapiens GN=SEPT11 PE=1 SV=3	1.22352	0.911673	0.823152	0.654257	0.526493	0.977107	0.986115	0.719286	0.266829
P02458	1|CO2A1	Isoform 1 of Collagen alpha-1(II) chain OS=Homo sapiens GN=COL2A1	1.44473		0.81118	1.30321		0.24789	1.12795	0.775548	0.352406
Q9Y6I3	1|EPN1	Isoform 2 of Epsin-1 OS=Homo sapiens GN=EPN1	0.466655	0.355032	0.616622	0.397123	0.320739	0.986399	0.479436	0.568087	-0.0886509
Q13642	1|FHL1	Isoform 1 of Four and a half LIM domains protein 1 OS=Homo sapiens GN=FHL1	0.839156	0.710172	0.879244	-0.276463	0.215794	0.661814	0.809524	0.200382	0.609142
Q13557	12|KCC2D	Isoform Delta 12 of Calcium/calmodulin-dependent protein kinase type II subunit delta OS=Homo sapiens GN=CAMK2D	0.00221987	0.907341	0.878101	-0.0809043	-0.492182	0.775276	0.595887	0.0673964	0.528491
P31946	1433B	14-3-3 protein beta/alpha OS=Homo sapiens GN=YWHAB PE=1 SV=3	1.66226	0.804964	0.641555	1.67615	0.530323	1.81208	1.03626	1.33952	-0.303258
P62258	1433E	14-3-3 protein epsilon OS=Homo sapiens GN=YWHAE PE=1 SV=1	1.67445	1.04101	0.968364	1.54732	0.672202	1.55921	1.22794	1.25958	-0.0316383
Q04917	1433F	14-3-3 protein eta OS=Homo sapiens GN=YWHAH PE=1 SV=4	1.17291	1.01707	1.13822	1.57464	0.910647	2.20072	1.1094	1.562	-0.452601
P61981	1433G	14-3-3 protein gamma OS=Homo sapiens GN=YWHAG PE=1 SV=2	1.45086	1.00667	1.13831	1.64476	1.57434	1.9935	1.19861	1.73753	-0.538921
P27348	1433T	14-3-3 protein theta OS=Homo sapiens GN=YWHAQ PE=1 SV=1	2.24477	1.06409	1.0826	1.6161	0.699887	1.78385	1.46382	1.36661	0.0972078
P63104	1433Z	14-3-3 protein zeta/delta OS=Homo sapiens GN=YWHAZ PE=1 SV=1	1.44788	1.00667	1.02278	1.68504	0.530323	1.81405	1.15911	1.34314	-0.184029
O95831	2|AIFM1	Isoform 2 of Apoptosis-inducing factor 1, mitochondrial OS=Homo sapiens GN=AIFM1	0.284607	0.7105	0.777734	0.160579	0.017641	0.249302	0.590947	0.142507	0.44844
P07355	2|ANXA2	Isoform 2 of Annexin A2 OS=Homo sapiens GN=ANXA2	1.1788	0.822877	1.13856	1.16436	0.843708	1.33449	1.04675	1.11419	-0.0674406
Q13510	2|ASAH1	Isoform 2 of Acid ceramidase OS=Homo sapiens GN=ASAH1	0.229375	0.970145	1.65975	0.982259	0.890035	1.63052	0.953089	1.16761	-0.214517
P16615	2|AT2A2	Isoform 2 of Sarcoplasmic/endoplasmic reticulum calcium ATPase 2 OS=Homo sapiens GN=ATP2A2	0.454332	0.731317	0.640014	-0.687889	-1.89892	0.457471	0.608554	-0.70978	1.31833
P36542	2|ATPG	Isoform Heart of ATP synthase subunit gamma, mitochondrial OS=Homo sapiens GN=ATP5C1	1.20294		0.471188	0.0288686		-0.294035	0.837065	-0.132583	0.969648
P47756	2|CAPZB	Isoform 2 of F-actin-capping protein subunit beta OS=Homo sapiens GN=CAPZB	0.678204	0.505713	0.407249	0.533547	1.02101	0.216319	0.530388	0.590292	-0.0599033
O75534	2|CSDE1	Isoform Short of Cold shock domain-containing protein E1 OS=Homo sapiens GN=CSDE1	0.997368	2.06389	0.939419	-0.142525	0.751729	1.68972	1.33356	0.766308	0.567251
Q9UJU6	2|DBNL	Isoform 2 of Drebrin-like protein OS=Homo sapiens GN=DBNL	0.953263	0.248106	0.220763	0.493482	0.86116	0.304623	0.474044	0.553088	-0.0790441
Q13561	2|DCTN2	Isoform 2 of Dynactin subunit 2 OS=Homo sapiens GN=DCTN2	0.473639	0.459277	-0.147669	0.285138	0.255326	0.656351	0.261749	0.398938	-0.137189
P29692	2|EF1D	Isoform 2 of Elongation factor 1-delta OS=Homo sapiens GN=EEF1D	0.351218	0.967559	0.515368	0.3215	1.38771	0.241565	0.611382	0.650259	-0.0388777
Q9Y680	2|FKBP7	Isoform 2 of Peptidyl-prolyl cis-trans isomerase FKBP7 OS=Homo sapiens GN=FKBP7	0.373382	0.517029	0.604551	0.270309	0.135077	0.838312	0.498321	0.414566	0.0837546
P21333	2|FLNA	Isoform 2 of Filamin-A OS=Homo sapiens GN=FLNA	2.94759	2.97259	2.46117	2.67073	2.75147	2.97695	2.79378	2.79972	-0.00593538
Q9HC38	2|GLOD4	Isoform 2 of Glyoxalase domain-containing protein 4 OS=Homo sapiens GN=GLOD4	0.470508	-0.496592	-0.208426	0.353959	0.355525	0.0696011	-0.0781702	0.259695	-0.337865
P07900	2|HS90A	Isoform 2 of Heat shock protein HSP 90-alpha OS=Homo sapiens GN=HSP90AA1	0.994151	0.178879	-0.388727	0.0125938	-0.548817	0.309798	0.261434	-0.0754752	0.33691
P20810	2|ICAL	Isoform 2 of Calpastatin OS=Homo sapiens GN=CAST	0.75673	1.49971	0.391837	0.433647	-0.0111775	0.628402	0.88276	0.350291	0.53247
P54819	2|KAD2	Isoform 2 of Adenylate kinase 2, mitochondrial OS=Homo sapiens GN=AK2	0.260511	0.587938	1.36484	-0.216998	0.316991	0.724484	0.737764	0.274825	0.462939
P60660	2|MYL6	Isoform Smooth muscle of Myosin light polypeptide 6 OS=Homo sapiens GN=MYL6	0.259178	0.0686708	0.235111	0.927415	1.4445	0.448775	0.187653	0.940229	-0.752576
P15531	2|NDKA	Isoform 2 of Nucleoside diphosphate kinase A OS=Homo sapiens GN=NME1	1.61078	0.395384	0.298561	0.769131	0.217446	0.790851	0.768243	0.592476	0.175767
P22392	2|NDKB	Isoform 3 of Nucleoside diphosphate kinase B OS=Homo sapiens GN=NME2	1.61078	0.395384	0.298561	0.769131	0.217446	0.790851	0.768243	0.592476	0.175767
O15460	2|P4HA2	Isoform IIa of Prolyl 4-hydroxylase subunit alpha-2 OS=Homo sapiens GN=P4HA2	0.534703	0.794663	0.825489	0.623976	1.1676	0.315326	0.718285	0.702301	0.0159844
Q8WX93	2|PALLD	Isoform 2 of Palladin OS=Homo sapiens GN=PALLD	0.673554	0.852694	0.208119	0.700615	0.78224	1.03625	0.578123	0.839702	-0.26158
O75781	2|PALM	Isoform 2 of Paralemmin-1 OS=Homo sapiens GN=PALM	1.43791	1.36679	1.18626	1.95458	2.24124	1.0817	1.33032	1.75917	-0.428852
Q15149	2|PLEC	Isoform 2 of Plectin OS=Homo sapiens GN=PLEC	0.655607	0.916223	0.97482	0.0154735	0.405112	0.380621	0.848884	0.267069	0.581815
O00469	2|PLOD2	Isoform 2 of Procollagen-lysine,2-oxoglutarate 5-dioxygenase 2 OS=Homo sapiens GN=PLOD2	0.269442	0.428959	0.233446	0.593841	0.961323	0.684893	0.310616	0.746686	-0.43607
P78527	2|PRKDC	Isoform 2 of DNA-dependent protein kinase catalytic subunit OS=Homo sapiens GN=PRKDC	0.939407	0.517668	0.574748	0.0806636	-0.297309	0.723847	0.677274	0.169067	0.508207
P43686	2|PRS6B	Isoform 2 of 26S protease regulatory subunit 6B OS=Homo sapiens GN=PSMC4	0.881198	0.531823	0.281581	0.79279	-0.670404	1.33204	0.564868	0.484809	0.080059
P25786	2|PSA1	Isoform Long of Proteasome subunit alpha type-1 OS=Homo sapiens GN=PSMA1	0.894127		0.514656	0.539172		1.33455	0.704391	0.936862	-0.23247
Q13308	2|PTK7	Isoform 2 of Inactive tyrosine-protein kinase 7 OS=Homo sapiens GN=PTK7	0.101443	0.0166308	0.208614	0.580328	0.0476196	0.38352	0.108896	0.337156	-0.22826
P06454	2|PTMA	Isoform 2 of Prothymosin alpha OS=Homo sapiens GN=PTMA	1.37736	0.472375	0.875779	0.390451	0.410049	0.45898	0.908506	0.419827	0.488679
P59190	2|RAB15	Isoform 2 of Ras-related protein Rab-15 OS=Homo sapiens GN=RAB15	0.502986	0.367739	0.443743	0.0467269	0.254549	-0.15422	0.438156	0.0490184	0.389138
Q92804	2|RBP56	Isoform Short of TATA-binding protein-associated factor 2N OS=Homo sapiens GN=TAF15	0.371428	0.333586	0.145237	0.572762	0.521487	0.635173	0.283417	0.576474	-0.293057
Q92900	2|RENT1	Isoform 2 of Regulator of nonsense transcripts 1 OS=Homo sapiens GN=UPF1	-0.0397265	0.927247	0.00348833	0.0618333	0.615457	0.57239	0.297003	0.41656	-0.119557
P09651	2|ROA1	Isoform A1-A of Heterogeneous nuclear ribonucleoprotein A1 OS=Homo sapiens GN=HNRNPA1	0.193596	0.354551	0.369082	0.66773	1.38303	0.574682	0.305743	0.875147	-0.569405
P22626	2|ROA2	Isoform A2 of Heterogeneous nuclear ribonucleoproteins A2/B1 OS=Homo sapiens GN=HNRNPA2B1	0.13911	0.383976	0.913066	0.184773	1.14927	0.00216661	0.478718	0.445403	0.0333145
Q99729	2|ROAA	Isoform 2 of Heterogeneous nuclear ribonucleoprotein A/B OS=Homo sapiens GN=HNRNPAB	0.401631	2.29165	0.247999	0.223648	2.65185	-0.843877	0.980428	0.677208	0.30322
Q16181	2|SEPT7	Isoform 2 of Septin-7 OS=Homo sapiens GN=SEPT7	0.490367	0.48534	0.407963	0.234743	0.560266	0.173634	0.461223	0.322881	0.138342
Q9Y617	2|SERC	Isoform 2 of Phosphoserine aminotransferase OS=Homo sapiens GN=PSAT1	1.49839	-0.259985	-0.287876	1.27224	0.0295788	0.712909	0.316843	0.671578	-0.354735
Q13033	2|STRN3	Isoform Alpha of Striatin-3 OS=Homo sapiens GN=STRN3		0.537064	0.0646925		0.633908	-0.0140635	0.300878	0.309922	-0.00904373
Q8NBJ7	2|SUMF2	Isoform 2 of Sulfatase-modifying factor 2 OS=Homo sapiens GN=SUMF2	0.554292		0.528946	0.506341		0.0058825	0.541619	0.256112	0.285507
Q9UMS6	2|SYNP2	Isoform 2 of Synaptopodin-2 OS=Homo sapiens GN=SYNPO2	-0.0677387	0.157308	0.0111104	0.73791	0.631457	0.228067	0.0335598	0.532478	-0.498918
P07951	2|TPM2	Isoform 2 of Tropomyosin beta chain OS=Homo sapiens GN=TPM2	0.339973	0.373725	-0.0677846	1.1767	1.26844	0.938802	0.215305	1.12798	-0.912677
P06753	2|TPM3	Isoform 2 of Tropomyosin alpha-3 chain OS=Homo sapiens GN=TPM3	0.637048	0.439316	0.113296	0.633518	1.11709	0.71885	0.396553	0.823152	-0.426599
P67936	2|TPM4	Isoform 2 of Tropomyosin alpha-4 chain OS=Homo sapiens GN=TPM4	1.03588	0.971701	0.204967	1.27478	1.43514	1.31449	0.737514	1.34147	-0.603954
Q9UI12	2|VATH	Isoform 2 of V-type proton ATPase subunit H OS=Homo sapiens GN=ATP6V1H	-0.069181	0.129331	0.213543	-0.143284	0.443222	0.187333	0.0912311	0.162424	-0.0711927
P20020	3|AT2B1	Isoform B of Plasma membrane calcium-transporting ATPase 1 OS=Homo sapiens GN=ATP2B1	0.450424	0.68847	0.525424	0.292706	-0.756468	0.721034	0.554773	0.0857573	0.469015
P13929	3|ENOB	Isoform 3 of Beta-enolase OS=Homo sapiens GN=ENO3	1.6877	1.10978	1.05248	1.87985	1.16584	1.64826	1.28332	1.56465	-0.281329
P11413	3|G6PD	Isoform 3 of Glucose-6-phosphate 1-dehydrogenase OS=Homo sapiens GN=G6PD	1.57689	1.23341	0.196727	0.256401	-0.596775	0.497287	1.00234	0.0523044	0.950037
P19367	3|HXK1	Isoform 3 of Hexokinase-1 OS=Homo sapiens GN=HK1	0.63312	0.801409	0.926855	0.576021	0.65786	0.991478	0.787128	0.741787	0.0453417
Q8WWI1	3|LMO7	Isoform 3 of LIM domain only protein 7 OS=Homo sapiens GN=LMO7	0.00901609	-0.22984	0.236335	0.817484	1.58755	1.36188	0.00517047	1.25564	-1.25047
Q96JY6	3|PDLI2	Isoform 3 of PDZ and LIM domain protein 2 OS=Homo sapiens GN=PDLIM2	0.218625	0.459424	0.590973	1.6771	0.341964	1.55634	0.423008	1.1918	-0.768793
P07602	3|SAP	Isoform Sap-mu-9 of Proactivator polypeptide OS=Homo sapiens GN=PSAP	1.81606	3.25298	3.38768	2.37394	2.89005	2.99837	2.81891	2.75412	0.064787
P09493	3|TPM1	Isoform 3 of Tropomyosin alpha-1 chain OS=Homo sapiens GN=TPM1	0.151808	0.0383203	-0.194383	0.672318	1.05624	0.569236	-0.00141834	0.76593	-0.767349
P31937	3HIDH	3-hydroxyisobutyrate dehydrogenase, mitochondrial OS=Homo sapiens GN=HIBADH PE=1 SV=2	0.0657387	0.821228	0.80888	0.292536	0.24981	0.521837	0.565282	0.354728	0.210554
Q05682	4|CALD1	Isoform 4 of Caldesmon OS=Homo sapiens GN=CALD1	0.473985	0.23273	0.325438	0.857305	1.33713	0.587094	0.344051	0.927175	-0.583124
Q9Y4E1	4|FA21C	Isoform 4 of WASH complex subunit FAM21C OS=Homo sapiens GN=FAM21C	0.304454	0.0177841	0.485236	0.443356	-0.232379	1.01501	0.269158	0.408663	-0.139505
Q14103	4|HNRPD	Isoform 4 of Heterogeneous nuclear ribonucleoprotein D0 OS=Homo sapiens GN=HNRNPD	0.174538	4.16192	0.309879	0.31467	5.37821	-0.59244	1.54878	1.70015	-0.151366
O60506	4|HNRPQ	Isoform 4 of Heterogeneous nuclear ribonucleoprotein Q OS=Homo sapiens GN=SYNCRIP	0.279333	0.499763	0.481971	0.407031	0.359667	0.560884	0.420356	0.442527	-0.0221715
O60271	4|JIP4	Isoform 4 of C-Jun-amino-terminal kinase-interacting protein 4 OS=Homo sapiens GN=SPAG9	1.12114	0.472375	0.810165	0.324837	0.410049	0.958651	0.801226	0.564512	0.236713
P21589	5NTD	5'-nucleotidase OS=Homo sapiens GN=NT5E PE=1 SV=1	0.397574	1.44249	0.453024	1.08109	1.43704	1.08592	0.764363	1.20135	-0.436988
Q9Y2D5	6|AKAP2	Isoform 4 of A-kinase anchor protein 2 OS=Homo sapiens GN=AKAP2	0.0282663	0.103814	0.0956832	0.27123	0.469533	0.283441	0.0759211	0.341401	-0.26548
P23634	6|AT2B4	Isoform XB of Plasma membrane calcium-transporting ATPase 4 OS=Homo sapiens GN=ATP2B4	0.723638	0.68847	0.525424	0.292706	-0.756468	0.721034	0.645844	0.0857573	0.560087
P27816	6|MAP4	Isoform 6 of Microtubule-associated protein 4 OS=Homo sapiens GN=MAP4	1.11379	0.843865	0.60312	0.819385	0.961469	0.880689	0.853593	0.887181	-0.0335882
P52209	6PGD	6-phosphogluconate dehydrogenase, decarboxylating OS=Homo sapiens GN=PGD PE=1 SV=3	1.57323	0.71017	0.768692	0.578437	0.265249	0.49283	1.01736	0.445505	0.571859
O95336	6PGL	6-phosphogluconolactonase OS=Homo sapiens GN=PGLS PE=1 SV=2	1.09086	0.386956	0.969048	0.550079	-0.236331	1.38711	0.815622	0.566953	0.24867
A0EJG6	A0EJG6	Long form collapsin response mediator protein 1 OS=Homo sapiens GN=CRMP1 PE=2 SV=1	0.821946	0.173771	-0.0171832	0.511174	1.05854	0.430239	0.326178	0.666651	-0.340473
A2A274	A2A274	Aconitase 2, mitochondrial OS=Homo sapiens GN=ACO2 PE=4 SV=1	1.30812	0.984909	0.883809	2.73517	0.823949	-0.224597	1.05894	1.11151	-0.0525641
A2A3N8	A2A3N8	Adducin 1 (Alpha) OS=Homo sapiens GN=ADD1 PE=4 SV=1		0.520916	0.297474		0.0236494	0.402444	0.409195	0.213047	0.196148
A2A3R5	A2A3R5	40S ribosomal protein S6 OS=Homo sapiens GN=RPS6 PE=3 SV=1	0.427973	0.826879	0.575979	-0.50775	-0.24035	0.047476	0.610277	-0.233541	0.843818
P01023	A2MG	Alpha-2-macroglobulin OS=Homo sapiens GN=A2M PE=1 SV=3	0.249942	1.02259	0.86924	-0.258303	0.0876496	-0.614481	0.713926	-0.261711	0.975637
A3KGN5	A3KGN5	Dimethylarginine dimethylaminohydrolase 2 (Fragment) OS=Homo sapiens GN=DDAH2 PE=4 SV=1	0.0965306	-1.75522	-0.177464	0.323589	-1.88423	0.0608019	-0.612052	-0.499947	-0.112106
A5YVE9	A5YVE9	Mitochondrial PDHA1 OS=Homo sapiens GN=PDHA1 PE=2 SV=1		0.5331	0.586949		0.0305415	0.178571	0.560024	0.104556	0.455468
A6NBZ8	A6NBZ8	Uncharacterized protein OS=Homo sapiens GN=ALB PE=4 SV=2	1.19957		-0.153198	-0.3074		-0.053858	0.523184	-0.180629	0.703814
A6NC19	A6NC19	Uncharacterized protein OS=Homo sapiens GN=PRDX5 PE=4 SV=1	0.545041		1.18551	0.902191		1.68457	0.865274	1.29338	-0.428105
A6NC48	A6NC48	Uncharacterized protein OS=Homo sapiens GN=BST1 PE=4 SV=1	0.819204	0.524974	0.944709	1.36105	0.113069	1.29257	0.762962	0.922227	-0.159265
A6NCD2	A6NCD2	Uncharacterized protein OS=Homo sapiens GN=CCT6A PE=3 SV=1	0.444015	0.892355	-0.184002	-0.226261	-0.695434	0.540914	0.384123	-0.126927	0.51105
A6NCQ0	A6NCQ0	Uncharacterized protein OS=Homo sapiens GN=NUDT5 PE=3 SV=1	0.692433	0.506657	0.0358886	0.326057	0.56376	-0.0108691	0.41166	0.292983	0.118677
A6NDY9	A6NDY9	Filamin A OS=Homo sapiens GN=FLNA PE=2 SV=4	2.95441	2.97181	2.4973	2.70833	2.74684	2.99364	2.80784	2.81627	-0.00842813
A6NE09	A6NE09	Uncharacterized protein OS=Homo sapiens PE=3 SV=1	0.670729		0.0223298	0.480687		0.234454	0.346529	0.35757	-0.0110411
A6NE14	A6NE14	Uncharacterized protein OS=Homo sapiens GN=CCT3 PE=2 SV=1	0.897301	0.53198	0.547453	-0.296112	0.219834	-0.124978	0.658911	-0.0670855	0.725997
A6NFI4	A6NFI4	Calponin 2, isoform CRA_a OS=Homo sapiens GN=CNN2 PE=2 SV=1	1.75551	1.12952	0.947688	1.42654	1.40531	1.2098	1.27757	1.34721	-0.0696392
A6NFX8	A6NFX8	Uncharacterized protein OS=Homo sapiens GN=NUDT5 PE=3 SV=1	0.692433	0.506657	0.0358886	0.326057	0.56376	-0.0108691	0.41166	0.292983	0.118677
A6NG06	A6NG06	Uncharacterized protein OS=Homo sapiens GN=PRDX5 PE=4 SV=1	0.53209	0.981323	0.995418	0.807148	1.39935	1.49448	0.836277	1.23366	-0.39738
A6NG45	A6NG45	Uncharacterized protein OS=Homo sapiens GN=PRDX4 PE=4 SV=1	0.122731	0.534298	0.103965	0.519842	0.22532	-0.280782	0.253665	0.154794	0.098871
A6NG51	A6NG51	Uncharacterized protein OS=Homo sapiens GN=SPTAN1 PE=4 SV=2	1.46951	1.31632	1.20155	1.79468	1.01803	1.69811	1.32913	1.50361	-0.17448
A6NGV1	A6NGV1	Uncharacterized protein OS=Homo sapiens GN=SET PE=2 SV=2	0.506208	0.604299	0.546651	0.658357	0.266627	0.537228	0.552386	0.487404	0.0649816
A6NHE8	A6NHE8	Uncharacterized protein OS=Homo sapiens GN=NUDT5 PE=3 SV=2	0.692433	0.506657	0.0358886	0.326057	0.56376	-0.0108691	0.41166	0.292983	0.118677
A6NHU4	A6NHU4	Uncharacterized protein OS=Homo sapiens GN=AKR1C1 PE=4 SV=1	1.44993	0.65837	0.593221	-0.0471347	-0.586133	-0.979255	0.900506	-0.537507	1.43801
A6NIB2	A6NIB2	Ribosomal protein, large, P1, isoform CRA_b OS=Homo sapiens GN=RPLP1 PE=4 SV=1	-0.190372	0.765997	1.50611	-0.0872146	0.475126	0.230604	0.693911	0.206172	0.487739
A6NIT8	A6NIT8	Uncharacterized protein OS=Homo sapiens GN=HNRNPL PE=2 SV=1	0.703882	0.527149	0.384182	-0.38274	-0.0439066	-0.0276557	0.538404	-0.151434	0.689838
A6NIW5	A6NIW5	Peroxiredoxin 2, isoform CRA_a OS=Homo sapiens GN=PRDX2 PE=4 SV=2	0.615711	0.202319	0.365499	0.323057	-0.0903233	-0.0120875	0.39451	0.0735489	0.320961
A6NJU6	A6NJU6	Uncharacterized protein OS=Homo sapiens GN=NUDT5 PE=3 SV=2	0.692433	0.506657	0.0358886	0.326057	0.56376	-0.0108691	0.41166	0.292983	0.118677
A6NJW1	A6NJW1	Basigin (Ok blood group), isoform CRA_f OS=Homo sapiens GN=BSG PE=2 SV=1	-0.219817	0.0726976	0.121967	0.216451	0.685355	0.185794	-0.00838404	0.362533	-0.370917
A6NKB8	A6NKB8	Uncharacterized protein OS=Homo sapiens GN=RNPEP PE=4 SV=1	1.2156	0.177759	-0.356287	0.618728	0.0370478	0.882754	0.345692	0.512843	-0.167151
A6NKH4	A6NKH4	Sorting nexin 1, isoform CRA_d OS=Homo sapiens GN=SNX1 PE=4 SV=2	0.506607	-0.0332869		0.297455	0.459641		0.23666	0.378548	-0.141888
A6NL76	A6NL76	Uncharacterized protein OS=Homo sapiens GN=ACTA1 PE=3 SV=2	3.10623	2.96052	3.5253	3.63954	4.70722	3.37371	3.19735	3.90682	-0.709472
A6NLG0	A6NLG0	Uncharacterized protein OS=Homo sapiens GN=FAM21C PE=4 SV=1	0.304454	0.139616	0.485236	0.443356	-0.0719991	1.01501	0.309769	0.462123	-0.152354
A6NLJ7	A6NLJ7	Ubiquitin carboxyl-terminal esterase L1 (Ubiquitin thiolesterase), isoform CRA_a OS=Homo sapiens GN=UCHL1 PE=2 SV=1	0.800438	0.922735	0.844915	1.22557	0.954403	1.49433	0.856029	1.22477	-0.368739
A6NM69	A6NM69	Uncharacterized protein OS=Homo sapiens GN=SCP2 PE=3 SV=2	2.05178	-0.764574	-0.794709	1.95955	-1.0894	-0.484389	0.164165	0.128587	0.0355781
A6NN01	A6NN01	Histone H2A OS=Homo sapiens GN=H2AFV PE=3 SV=1	-0.042506	0.130605	0.473256	0.448716	1.40811	-0.0977938	0.187118	0.586343	-0.399225
A6NN80	A6NN80	Annexin A6, isoform CRA_c OS=Homo sapiens GN=ANXA6 PE=3 SV=3	2.6827	1.8303	1.49777	2.51611	2.02609	2.0642	2.00359	2.20214	-0.198547
A6NN88	A6NN88	Uncharacterized protein OS=Homo sapiens GN=SPTAN1 PE=4 SV=2	0.119385	0.781981	0.4577	0.437168	0.221765	0.979555	0.453022	0.546163	-0.0931407
A6NNE8	A6NNE8	Uncharacterized protein OS=Homo sapiens GN=SRSF7 PE=4 SV=3	1.53217		1.30038	1.76481		1.50099	1.41628	1.6329	-0.216622
A6PVX3	A6PVX3	Proteasome (Prosome, macropain) 26S subunit, non-ATPase, 4 (Fragment) OS=Homo sapiens GN=PSMD4 PE=4 SV=1	0.381848	-0.137438	0.172057	0.468238	0.290651	-0.0933378	0.138822	0.22185	-0.083028
A6PW80	A6PW80	Eukaryotic translation elongation factor 1 alpha 1 (Fragment) OS=Homo sapiens GN=EEF1A1 PE=4 SV=1	1.20582	0.377936	-0.0487591	-0.0645093	-0.0866234	-0.0704029	0.511665	-0.0738452	0.585511
A7MAP0	A7MAP0	Coronin-1C_i2 protein OS=Homo sapiens GN=CORO1C PE=2 SV=1	1.18762	0.335735	-0.0872622	0.122225	0.0906403	0.338479	0.478698	0.183781	0.294917
A7YIJ8	A7YIJ8	Radixin isoform b OS=Homo sapiens GN=RDX PE=2 SV=1	0.78011	0.306479	0.248734	0.466458	0.752932	0.984627	0.445108	0.734672	-0.289565
A8K092	A8K092	ATP synthase subunit alpha OS=Homo sapiens GN=ATP5A1 PE=2 SV=1	0.21591	0.912038	0.981771	0.477281	1.19067	0.426506	0.70324	0.698153	0.00508644
A8K0C0	A8K0C0	Peroxiredoxin 2, isoform CRA_d OS=Homo sapiens GN=PRDX2 PE=2 SV=1	0.92951	0.28843	0.365499	0.204445	-0.0547993	-0.0120875	0.527813	0.0458529	0.48196
A8K0X1	A8K0X1	Uncharacterized protein OS=Homo sapiens GN=CALD1 PE=2 SV=1	0.45293	0.23604	0.30538	0.84425	1.34388	0.584854	0.33145	0.924328	-0.592879
A8K318	A8K318	Uncharacterized protein OS=Homo sapiens GN=PRKCSH PE=2 SV=1	0.37247	0.47301	0.566245	0.307259	0.625696	-0.176436	0.470575	0.252173	0.218402
A8K3Z3	A8K3Z3	Proteasome (Prosome, macropain) 26S subunit, ATPase, 5, isoform CRA_b OS=Homo sapiens GN=PSMC5 PE=2 SV=1	0.945444	0.808206	0.321793	0.333336	0.115112	-0.0247392	0.691814	0.141236	0.550578
A8K7Q2	A8K7Q2	Uncharacterized protein OS=Homo sapiens GN=HSPA8 PE=2 SV=1	1.00682	0.541401	0.503982	0.744383	0.55548	1.20829	0.684066	0.836052	-0.151986
A8K854	A8K854	HCG1983504, isoform CRA_f OS=Homo sapiens GN=hCG_1983504 PE=2 SV=1	1.4598	1.25251	1.18126	1.60249	0.862299	2.13151	1.29786	1.5321	-0.234244
A8K8G0	A8K8G0	Uncharacterized protein OS=Homo sapiens GN=HDGF PE=2 SV=1	0.165707	-0.234756	-0.25093	0.223679	-0.483496	0.380579	-0.10666	0.0402539	-0.146914
A8K8J9	A8K8J9	Dynactin 2 (P50), isoform CRA_b OS=Homo sapiens GN=DCTN2 PE=2 SV=1	0.473639	0.459277	-0.147669	0.285138	0.255326	0.656351	0.261749	0.398938	-0.137189
A8K8R8	A8K8R8	Uncharacterized protein OS=Homo sapiens GN=C1orf198 PE=2 SV=1	0.0515808	-0.339811	0.00391692	0.63026	0.272893	0.588471	-0.0947713	0.497208	-0.591979
A8MTM1	A8MTM1	Uncharacterized protein OS=Homo sapiens GN=CBR1 PE=4 SV=1	1.27188	0.281839	0.00781315	0.298996	-0.537852	0.701309	0.520511	0.154151	0.366361
A8MU24	A8MU24	Prolylcarboxypeptidase (Angiotensinase C), isoform CRA_b OS=Homo sapiens GN=PRCP PE=4 SV=1	0.097674	0.357428	0.82901	0.735371	1.24183	0.938019	0.428037	0.971742	-0.543704
A8MUB1	A8MUB1	Tubulin, alpha 1 (Testis specific), isoform CRA_a OS=Homo sapiens GN=TUBA4A PE=2 SV=1	1.45646	0.391556	0.65372	1.319	-0.18311	1.75855	0.833913	0.964811	-0.130898
A8MUD9	A8MUD9	Uncharacterized protein OS=Homo sapiens GN=RPL7 PE=3 SV=1		-0.112916	0.291436		-1.64323	0.0803213	0.0892599	-0.781456	0.870716
A8MUE4	A8MUE4	Uncharacterized protein OS=Homo sapiens GN=ATP6V1E1 PE=2 SV=1	0.792868	0.61341	0.195132	0.56164	-0.623468	0.649035	0.533803	0.195736	0.338068
A8MUH2	A8MUH2	ATP synthase-coupling factor 6, mitochondrial OS=Homo sapiens GN=ATP5J PE=3 SV=1	-0.444976	0.15776	0.581204	0.460385	0.820455	0.385902	0.0979959	0.555581	-0.457585
A8MUS3	A8MUS3	Ribosomal protein L23a, isoform CRA_a OS=Homo sapiens GN=RPL23A PE=3 SV=1	0.512105	0.576348	0.63577	0.130507	0.833903	-0.282013	0.574741	0.227466	0.347275
A8MV37	A8MV37	Uncharacterized protein OS=Homo sapiens GN=SEC13 PE=4 SV=1	0.900619	0.919173	-0.0529985	0.34519	0.959324	0.438914	0.588931	0.581143	0.0077888
A8MV58	A8MV58	Uncharacterized protein OS=Homo sapiens GN=DBN1 PE=4 SV=1	0.622086	0.305047	0.00752871	0.864473	-0.300173	0.664525	0.311554	0.409609	-0.0980545
A8MVA9	A8MVA9	Uncharacterized protein OS=Homo sapiens GN=WDR1 PE=4 SV=2	1.06526	0.0957194	-0.139137	0.988159	0.468037	0.910863	0.340614	0.789019	-0.448405
A8MVZ9	A8MVZ9	Fructose-bisphosphate aldolase OS=Homo sapiens GN=ALDOC PE=3 SV=1	0.0247669	-0.102577	0.490044	-0.776097	-0.242274	1.75747	0.137411	0.246366	-0.108955
A8MW50	A8MW50	L-lactate dehydrogenase OS=Homo sapiens GN=LDHB PE=3 SV=1	1.65922	0.947303	0.728693	1.16681	1.03166	0.379486	1.11174	0.859318	0.252422
A8MW68	A8MW68	Uncharacterized protein OS=Homo sapiens GN=CAPZA2 PE=4 SV=1	0.873488	0.532979	0.625593	0.853109	1.68111	1.69567	0.677353	1.40996	-0.73261
A8MWI8	A8MWI8	Uncharacterized protein OS=Homo sapiens GN=CCT7 PE=2 SV=1	0.527621		-1.39227	-0.725355		-2.12072	-0.432326	-1.42304	0.990713
A8MX94	A8MX94	Uncharacterized protein OS=Homo sapiens GN=GSTP1 PE=3 SV=1	2.70256	0.946045	1.41978	2.16867	-0.0832188	1.64375	1.68946	1.24307	0.446394
A8MXA8	A8MXA8	Uncharacterized protein OS=Homo sapiens GN=RPL23A PE=3 SV=1	0.512105	0.576348	0.63577	0.130507	0.833903	-0.282013	0.574741	0.227466	0.347275
A8MXB9	A8MXB9	Uncharacterized protein OS=Homo sapiens GN=SUMF2 PE=4 SV=2	0.554292		0.528946	0.506341		0.0058825	0.541619	0.256112	0.285507
A8MXE0	A8MXE0	Uncharacterized protein OS=Homo sapiens GN=P4HA2 PE=4 SV=1	0.250717	0.259514	0.567814	0.251143	0.844989	0.129165	0.359348	0.408432	-0.0490839
A8MXF4	A8MXF4	Uncharacterized protein OS=Homo sapiens GN=ITIH3 PE=4 SV=1	0.0292594	0.360549	1.53416	-0.038153	0.109647	1.02445	0.641323	0.365315	0.276009
A8MXL6	A8MXL6	Uncharacterized protein OS=Homo sapiens GN=SEC13 PE=4 SV=1	0.900619	0.919173	-0.0529985	0.34519	0.959324	0.438914	0.588931	0.581143	0.0077888
A8MXP8	A8MXP8	Uncharacterized protein OS=Homo sapiens GN=RCN2 PE=4 SV=1	-0.00310863	0.558251	0.492153	0.151655	0.493265	0.533065	0.349098	0.392662	-0.0435633
A8MXQ4	A8MXQ4	L-lactate dehydrogenase OS=Homo sapiens GN=LDHA PE=3 SV=2	1.46494	0.711111	0.201841	1.31934	1.10645	0.974503	0.79263	1.13343	-0.340803
A8MXW0	A8MXW0	Uncharacterized protein OS=Homo sapiens GN=ARHGDIA PE=2 SV=2	0.975499	0.549255	0.150905	-0.169619	-0.378122	-0.0421266	0.558553	-0.196623	0.755176
A8MZ71	A8MZ71	Uncharacterized protein OS=Homo sapiens GN=COX7A2 PE=4 SV=1	0.0972236	0.468332	0.676814	0.349071	0.104465	0.170952	0.414123	0.208162	0.205961
P00505	AATM	Aspartate aminotransferase, mitochondrial OS=Homo sapiens GN=GOT2 PE=1 SV=3	0.934139	0.379333	0.312501	0.492904	0.683007	0.282272	0.541991	0.486061	0.0559295
Q96IU4	ABHEB	Abhydrolase domain-containing protein 14B OS=Homo sapiens GN=ABHD14B PE=1 SV=1	0.860756	-0.0432873	-0.185934	-0.100009	-0.00168429	0.0721356	0.210511	-0.00985261	0.220364
P11310	ACADM	Medium-chain specific acyl-CoA dehydrogenase, mitochondrial OS=Homo sapiens GN=ACADM PE=1 SV=1	0.126083	0.585822	0.357417	0.65518	1.44338	0.362532	0.356441	0.820363	-0.463922
P49748	ACADV	Very long-chain specific acyl-CoA dehydrogenase, mitochondrial OS=Homo sapiens GN=ACADVL PE=1 SV=1	0.452492	0.901642	1.21976	0.0384428	-0.6747	-0.101512	0.857965	-0.245923	1.10389
P53396	ACLY	ATP-citrate synthase OS=Homo sapiens GN=ACLY PE=1 SV=3	0.963533	0.685667	0.600255	-0.052686	-0.842722	0.747225	0.749818	-0.0493944	0.799213
P21399	ACOC	Cytoplasmic aconitate hydratase OS=Homo sapiens GN=ACO1 PE=1 SV=3	1.53773	0.600475	0.82171	1.32396	-0.764801	1.35692	0.986639	0.638692	0.347947
Q99798	ACON	Aconitate hydratase, mitochondrial OS=Homo sapiens GN=ACO2 PE=1 SV=2	1.30812	0.984909	0.883809	2.73517	0.823949	-0.224597	1.05894	1.11151	-0.0525641
Q86TX2	ACOT1	Acyl-coenzyme A thioesterase 1 OS=Homo sapiens GN=ACOT1 PE=1 SV=1	0.185472	0.678555	0.602657	0.0938626	-0.451133	0.350257	0.488895	-0.0023378	0.491232
P49753	ACOT2	Acyl-coenzyme A thioesterase 2, mitochondrial OS=Homo sapiens GN=ACOT2 PE=1 SV=6	0.185472	0.678555	0.602657	0.0938626	-0.451133	0.350257	0.488895	-0.0023378	0.491232
Q15067	ACOX1	Peroxisomal acyl-coenzyme A oxidase 1 OS=Homo sapiens GN=ACOX1 PE=1 SV=3	0.908623	1.71065	1.57969	0.395888	0.0552212	0.426103	1.39965	0.292404	1.10725
P62736	ACTA	Actin, aortic smooth muscle OS=Homo sapiens GN=ACTA2 PE=1 SV=1	3.11713	2.96619	3.4966	3.65816	4.72099	3.61092	3.19331	3.99669	-0.803385
P60709	ACTB	Actin, cytoplasmic 1 OS=Homo sapiens GN=ACTB PE=1 SV=1	3.10591	3.03164	3.4966	3.60212	4.06293	3.61092	3.21138	3.75866	-0.547276
Q562R1	ACTBL	Beta-actin-like protein 2 OS=Homo sapiens GN=ACTBL2 PE=1 SV=2	0.415849	0.158773	1.17564	0.620184	0.996919	1.35907	0.583422	0.992057	-0.408635
Q9BYX7	ACTBM	Putative beta-actin-like protein 3 OS=Homo sapiens GN=POTEKP PE=5 SV=1	1.06269	1.1539	1.24123	1.38255	0.912977	1.31176	1.15261	1.20243	-0.0498213
P68032	ACTC	Actin, alpha cardiac muscle 1 OS=Homo sapiens GN=ACTC1 PE=1 SV=1	3.10623	2.97731	3.5253	3.65962	4.70722	3.61273	3.20295	3.99319	-0.790241
P63261	ACTG	Actin, cytoplasmic 2 OS=Homo sapiens GN=ACTG1 PE=1 SV=1	3.10591	3.03164	3.4966	3.60212	4.06293	3.61092	3.21138	3.75866	-0.547276
P63267	ACTH	Actin, gamma-enteric smooth muscle OS=Homo sapiens GN=ACTG2 PE=1 SV=1	3.11713	2.96619	3.4966	3.65816	4.72099	3.61092	3.19331	3.99669	-0.803385
P12814	ACTN1	Alpha-actinin-1 OS=Homo sapiens GN=ACTN1 PE=1 SV=2	1.09775	1.05889	0.932367	1.61991	1.15693	2.00438	1.02967	1.59374	-0.564069
P35609	ACTN2	Alpha-actinin-2 OS=Homo sapiens GN=ACTN2 PE=1 SV=1	0.763189	0.401238	0.326947	1.18044	0.6423	1.53922	0.497125	1.12065	-0.623528
Q08043	ACTN3	Alpha-actinin-3 OS=Homo sapiens GN=ACTN3 PE=1 SV=2	0.226779	0.0904122	-0.32388	0.345234	0.675261	0.607537	-0.00222944	0.542677	-0.544907
O43707	ACTN4	Alpha-actinin-4 OS=Homo sapiens GN=ACTN4 PE=1 SV=2	0.897711	0.906976	0.776098	1.38463	0.910898	1.55714	0.860262	1.28422	-0.42396
P68133	ACTS	Actin, alpha skeletal muscle OS=Homo sapiens GN=ACTA1 PE=1 SV=1	3.12361	2.97731	3.55401	3.66053	4.70722	3.61981	3.21831	3.99585	-0.777545
P35611	ADDA	Alpha-adducin OS=Homo sapiens GN=ADD1 PE=1 SV=2		0.520916	0.297474		0.0236494	0.402444	0.409195	0.213047	0.196148
P00325	ADH1B	Alcohol dehydrogenase 1B OS=Homo sapiens GN=ADH1B PE=1 SV=2	0.904748	-0.215596	0.335063	-1.20696	-0.964903	-1.16561	0.341405	-1.11249	1.4539
P11766	ADHX	Alcohol dehydrogenase class-3 OS=Homo sapiens GN=ADH5 PE=1 SV=4	1.21843	-0.163494	-0.120304	0.821703	0.717991	0.353822	0.311543	0.631172	-0.319629
Q09666	AHNK	Neuroblast differentiation-associated protein AHNAK OS=Homo sapiens GN=AHNAK PE=1 SV=2	1.48111	2.02231	2.00581	1.78151	2.12765	2.17478	1.83641	2.02798	-0.191571
Q8IVF2	AHNK2	Protein AHNAK2 OS=Homo sapiens GN=AHNAK2 PE=1 SV=2	0.0572947	0.401119	0.500203	0.0540246	0.262215	0.816505	0.319539	0.377582	-0.0580428
Q16352	AINX	Alpha-internexin OS=Homo sapiens GN=INA PE=1 SV=2	0.165781	0.497376	1.23171	-0.128596	0.603128	0.423025	0.631624	0.299186	0.332438
P14550	AK1A1	Alcohol dehydrogenase [NADP+] OS=Homo sapiens GN=AKR1A1 PE=1 SV=3	0.852655	0.421623	-0.0626979	1.62574	-0.197724	0.908938	0.40386	0.778985	-0.375125
Q04828	AK1C1	Aldo-keto reductase family 1 member C1 OS=Homo sapiens GN=AKR1C1 PE=1 SV=1	2.20825	1.57742	1.47119	0.789924	0.37676	1.14553	1.75228	0.77074	0.981545
P52895	AK1C2	Aldo-keto reductase family 1 member C2 OS=Homo sapiens GN=AKR1C2 PE=1 SV=3	2.20825	1.53818	1.53821	0.811647	0.415556	1.10043	1.76155	0.775878	0.985672
P42330	AK1C3	Aldo-keto reductase family 1 member C3 OS=Homo sapiens GN=AKR1C3 PE=1 SV=4	1.44617	1.22367	1.22106	0.418438	0.233963	-0.207758	1.29697	0.148215	1.14875
P17516	AK1C4	Aldo-keto reductase family 1 member C4 OS=Homo sapiens GN=AKR1C4 PE=1 SV=3	1.44993	0.65837	0.593221	-0.0471347	-0.586133	-0.979255	0.900506	-0.537507	1.43801
Q02952	AKA12	A-kinase anchor protein 12 OS=Homo sapiens GN=AKAP12 PE=1 SV=4	0.389306	0.348059	0.495796	0.516878	0.85806	0.617074	0.411054	0.664004	-0.25295
P30837	AL1B1	Aldehyde dehydrogenase X, mitochondrial OS=Homo sapiens GN=ALDH1B1 PE=1 SV=3	-0.0229537	0.184217	0.598265	0.755302	0.814761	0.78008	0.253176	0.783381	-0.530205
Q3SY69	AL1L2	Aldehyde dehydrogenase family 1 member L2, mitochondrial OS=Homo sapiens GN=ALDH1L2 PE=1 SV=2	0.792743	0.713585	0.982206	0.71882	0.415652	0.952145	0.829511	0.695539	0.133972
P30038	AL4A1	Delta-1-pyrroline-5-carboxylate dehydrogenase, mitochondrial OS=Homo sapiens GN=ALDH4A1 PE=1 SV=3	0.454639	0.685451		-0.116479	0.451381	-0.539552	0.570045	-0.0682165	0.638261
P49419	AL7A1	Alpha-aminoadipic semialdehyde dehydrogenase OS=Homo sapiens GN=ALDH7A1 PE=1 SV=5	0.464525	0.869145	1.09758	0.618558	0.698565	0.265729	0.810415	0.527617	0.282798
P49189	AL9A1	4-trimethylaminobutyraldehyde dehydrogenase OS=Homo sapiens GN=ALDH9A1 PE=1 SV=3	0.930617	0.73799	0.432085	0.610199	0.434808	-0.28369	0.700231	0.253772	0.446458
P02768	ALBU	Serum albumin OS=Homo sapiens GN=ALB PE=1 SV=2	1.19957		-0.153198	-0.3074		-0.053858	0.523184	-0.180629	0.703814
P05091	ALDH2	Aldehyde dehydrogenase, mitochondrial OS=Homo sapiens GN=ALDH2 PE=1 SV=2	0.333006	0.581326	1.00223	-0.0114268	0.130171	-0.642469	0.638853	-0.174575	0.813428
P04075	ALDOA	Fructose-bisphosphate aldolase A OS=Homo sapiens GN=ALDOA PE=1 SV=2	1.56808	0.796522	0.776468	1.13414	1.20172	0.51226	1.04703	0.949375	0.0976501
P09972	ALDOC	Fructose-bisphosphate aldolase C OS=Homo sapiens GN=ALDOC PE=1 SV=2	0.722452	-0.102577	0.490044	0.238085	-0.242274	1.75747	0.369973	0.584427	-0.214454
Q9H4A4	AMPB	Aminopeptidase B OS=Homo sapiens GN=RNPEP PE=1 SV=2	1.2156	0.177759	-0.356287	0.618728	0.0370478	0.882754	0.345692	0.512843	-0.167151
P28838	AMPL	Cytosol aminopeptidase OS=Homo sapiens GN=LAP3 PE=1 SV=3	0.877572	1.17147	0.402529	-0.325126	-0.299163	-0.192757	0.817189	-0.272349	1.08954
P15144	AMPN	Aminopeptidase N OS=Homo sapiens GN=ANPEP PE=1 SV=4	1.05627	1.06693	1.22231	1.24884	1.54213	1.14668	1.11517	1.31255	-0.197375
P30533	AMRP	Alpha-2-macroglobulin receptor-associated protein OS=Homo sapiens GN=LRPAP1 PE=1 SV=1	0.447666	0.487884	1.01846	-0.0514818	0.711405	-0.235778	0.651338	0.141382	0.509956
P54802	ANAG	Alpha-N-acetylglucosaminidase OS=Homo sapiens GN=NAGLU PE=1 SV=2	0.0828191	0.525739	0.729086	0.561199	0.635913	0.4113	0.445881	0.536138	-0.0902564
Q99873	ANM1	Protein arginine N-methyltransferase 1 OS=Homo sapiens GN=PRMT1 PE=1 SV=2	0.49041	0.34837	0.32036	0.306849	0.36464	0.485857	0.38638	0.385782	0.000598118
P04083	ANXA1	Annexin A1 OS=Homo sapiens GN=ANXA1 PE=1 SV=2	1.05321	0.532509	1.74261	0.617898	0.0243031	0.798495	1.10944	0.480232	0.629211
P09525	ANXA4	Annexin A4 OS=Homo sapiens GN=ANXA4 PE=1 SV=4	1.40903	0.801115	0.666871	1.31159	0.463866	0.766204	0.959005	0.847219	0.111786
P08758	ANXA5	Annexin A5 OS=Homo sapiens GN=ANXA5 PE=1 SV=2	1.44557	0.665589	0.855448	1.52	0.971618	1.3515	0.98887	1.28104	-0.292169
P08133	ANXA6	Annexin A6 OS=Homo sapiens GN=ANXA6 PE=1 SV=3	2.6827	1.8303	1.46928	2.51611	2.02609	1.90188	1.99409	2.14803	-0.153938
O95782	AP2A1	AP-2 complex subunit alpha-1 OS=Homo sapiens GN=AP2A1 PE=1 SV=3	1.1584		0.584787	-0.890471		0.132555	0.871594	-0.378958	1.25055
O15143	ARC1B	Actin-related protein 2/3 complex subunit 1B OS=Homo sapiens GN=ARPC1B PE=1 SV=3	0.703383		0.108634	0.487009		0.668626	0.406008	0.577818	-0.171809
O43488	ARK72	Aflatoxin B1 aldehyde reductase member 2 OS=Homo sapiens GN=AKR7A2 PE=1 SV=3	1.22494		0.554373	-0.257913		0.783743	0.889656	0.262915	0.626741
P61160	ARP2	Actin-related protein 2 OS=Homo sapiens GN=ACTR2 PE=1 SV=1	0.243092	-0.0941851	-0.395766	0.235471	0.228497	0.0669656	-0.0822864	0.176978	-0.259264
P61158	ARP3	Actin-related protein 3 OS=Homo sapiens GN=ACTR3 PE=1 SV=3	0.942627	0.414778	0.245304	0.874561	0.669473	0.61947	0.534236	0.721168	-0.186932
O15145	ARPC3	Actin-related protein 2/3 complex subunit 3 OS=Homo sapiens GN=ARPC3 PE=1 SV=3	1.21486	0.659727	0.591619	1.3412	0.375194	1.85211	0.82207	1.1895	-0.367431
O15511	ARPC5	Actin-related protein 2/3 complex subunit 5 OS=Homo sapiens GN=ARPC5 PE=1 SV=3	0.288803		0.176127	0.572568		0.891914	0.232465	0.732241	-0.499776
P15289	ARSA	Arylsulfatase A OS=Homo sapiens GN=ARSA PE=1 SV=3	-0.0244117	0.588988	0.656737	0.782133	0.929495	0.846395	0.407105	0.852675	-0.44557
P15848	ARSB	Arylsulfatase B OS=Homo sapiens GN=ARSB PE=1 SV=1	-0.493766	0.021752	-0.268451	0.32505	0.843304	0.402436	-0.246822	0.523597	-0.770418
P05023	AT1A1	Sodium/potassium-transporting ATPase subunit alpha-1 OS=Homo sapiens GN=ATP1A1 PE=1 SV=1		0.707023	0.766067		-0.292519	0.212629	0.736545	-0.0399451	0.77649
O75947	ATP5H	ATP synthase subunit d, mitochondrial OS=Homo sapiens GN=ATP5H PE=1 SV=3	0.736572	0.776828	1.60741	1.27769	0.846701	1.35401	1.04027	1.15947	-0.119197
P18859	ATP5J	ATP synthase-coupling factor 6, mitochondrial OS=Homo sapiens GN=ATP5J PE=1 SV=1	-0.444976	0.15776	0.581204	0.460385	0.820455	0.385902	0.0979959	0.555581	-0.457585
P25705	ATPA	ATP synthase subunit alpha, mitochondrial OS=Homo sapiens GN=ATP5A1 PE=1 SV=1	0.21591	0.912038	0.881375	0.477281	1.19067	0.421545	0.669774	0.6965	-0.0267254
P06576	ATPB	ATP synthase subunit beta, mitochondrial OS=Homo sapiens GN=ATP5B PE=1 SV=3	0.463023	0.184793	1.04173	0.789068	0.906559	0.958766	0.563182	0.884798	-0.321616
P48047	ATPO	ATP synthase subunit O, mitochondrial OS=Homo sapiens GN=ATP5O PE=1 SV=1	0.552659	0.213907	0.712664	0.0733734	0.624434	-0.800311	0.493076	-0.0341679	0.527244
A6NMY6	AXA2L	Putative annexin A2-like protein OS=Homo sapiens GN=ANXA2P2 PE=5 SV=2	0.832042	0.402929	0.603235	0.641771	0.243818	0.785899	0.612736	0.557163	0.0555729
B0AZP7	B0AZP7	Uncharacterized protein OS=Homo sapiens GN=VAT1 PE=2 SV=1	0.274159	0.573147		-1.85195	0.0195713		0.423653	-0.916189	1.33984
B0AZS6	B0AZS6	Uncharacterized protein OS=Homo sapiens GN=YWHAZ PE=2 SV=1	1.44788	1.05329	1.02278	1.68504	0.459928	1.81405	1.17465	1.31967	-0.145026
B0YJC4	B0YJC4	Uncharacterized protein OS=Homo sapiens GN=VIM PE=3 SV=1	3.63592	4.63149	4.31149	3.10269	3.77981	3.7215	4.19297	3.53467	0.658301
B0YJC5	B0YJC5	Uncharacterized protein OS=Homo sapiens GN=VIM PE=3 SV=1	3.63372	4.45017	4.20296	2.97405	3.67922	3.72087	4.09562	3.45805	0.637573
B1AH78	B1AH78	Ras-related C3 botulinum toxin substrate 2 (Rho family, small GTP binding protein Rac2) (Fragment) OS=Homo sapiens GN=RAC2 PE=3 SV=1	0.717703	1.04404	0.760796	0.297739	0.502924	-0.0244631	0.840847	0.258733	0.582113
B1AHC7	B1AHC7	Uncharacterized protein OS=Homo sapiens GN=XRCC6 PE=4 SV=1	0.355523	0.514473	0.315977	0.115768	0.626595	0.457964	0.395325	0.400109	-0.00478427
B1AHC8	B1AHC8	Uncharacterized protein OS=Homo sapiens GN=XRCC6 PE=2 SV=1	0.241356	0.514473	0.315977	0.115768	0.626595	0.457964	0.357269	0.400109	-0.04284
B1AHC9	B1AHC9	Uncharacterized protein OS=Homo sapiens GN=XRCC6 PE=4 SV=1	0.469691	0.514473	0.221258	0.210488	0.626595	0.459145	0.401807	0.432076	-0.0302684
B1AHF3	B1AHF3	Cytochrome b5 reductase 3 (Fragment) OS=Homo sapiens GN=CYB5R3 PE=4 SV=1	-0.0463395	0.109298	0.464528	0.00724113	1.83369	-0.299447	0.175829	0.513827	-0.337998
B1AJQ6	B1AJQ6	Syntaxin 12 (Fragment) OS=Homo sapiens GN=STX12 PE=4 SV=1	0.0560054	-0.108496	-0.321851	0.100353	0.136695	-0.206539	-0.12478	0.0101697	-0.13495
B1AK85	B1AK85	Capping protein (Actin filament) muscle Z-line, beta OS=Homo sapiens GN=CAPZB PE=2 SV=1	1.01868	0.65879	0.146389	0.536131	0.703731	0.207209	0.607952	0.482357	0.125595
B1AK87	B1AK87	Capping protein (Actin filament) muscle Z-line, beta OS=Homo sapiens GN=CAPZB PE=4 SV=1	0.678204	0.505713	0.407249	0.533547	1.02101	0.216319	0.530388	0.590292	-0.0599033
B1AK88	B1AK88	Capping protein (Actin filament) muscle Z-line, beta OS=Homo sapiens GN=CAPZB PE=4 SV=1	0.678204	0.505713	0.407249	0.533547	1.02101	0.216319	0.530388	0.590292	-0.0599033
B1AKQ8	B1AKQ8	Guanine nucleotide binding protein (G protein), beta polypeptide 1 (Fragment) OS=Homo sapiens GN=GNB1 PE=4 SV=1	-0.43814	0.244118	0.0171246	0.429794	0.185509	0.557482	-0.0589656	0.390928	-0.449894
B1AKQ9	B1AKQ9	Guanine nucleotide binding protein (G protein), beta polypeptide 1 (Fragment) OS=Homo sapiens GN=GNB1 PE=4 SV=1	-0.43814	0.244118	0.0171246	0.429794	0.185509	0.557482	-0.0589656	0.390928	-0.449894
B1AKR6	B1AKR6	Dynein, light chain, roadblock-type 1 OS=Homo sapiens GN=DYNLRB1 PE=4 SV=1	-0.0557737	-0.386938	-0.00409586	0.274362	0.842856	0.583864	-0.148936	0.567027	-0.715963
B1ALW1	B1ALW1	Thioredoxin OS=Homo sapiens GN=TXN PE=4 SV=1	1.46843	0.378567		0.267027	-0.988022		0.923499	-0.360498	1.284
B1ALY0	B1ALY0	A kinase (PRKA) anchor protein 2 (Fragment) OS=Homo sapiens GN=AKAP2 PE=4 SV=1	-0.134595	-0.0903016	0.2943	-0.122771	0.276619	-0.0719217	0.0231347	0.0273087	-0.00417406
B1AM77	B1AM77	Stomatin OS=Homo sapiens GN=STOM PE=4 SV=1	0.491558	0.677559	0.977067	0.421756	0.0324735	0.436566	0.715395	0.296932	0.418463
B1ANR0	B1ANR0	Poly(A) binding protein, cytoplasmic 4 (Inducible form) OS=Homo sapiens GN=PABPC4 PE=4 SV=1	1.54919		0.875389	1.58068		0.92923	1.21229	1.25496	-0.0426653
B1ANR1	B1ANR1	Poly(A) binding protein, cytoplasmic 4 (Inducible form) (Fragment) OS=Homo sapiens GN=PABPC4 PE=4 SV=1	2.72561		0.875389	1.54478		1.26884	1.8005	1.40681	0.393687
B1AR61	B1AR61	Hexokinase 1 (Fragment) OS=Homo sapiens GN=HK1 PE=3 SV=1	0.740938		0.980764	0.60405		1.23349	0.860851	0.91877	-0.0579192
B1AR62	B1AR62	Hexokinase 1 (Fragment) OS=Homo sapiens GN=HK1 PE=3 SV=1	0.740938		0.980764	0.60405		1.23349	0.860851	0.91877	-0.0579192
B1AR63	B1AR63	Hexokinase 1 (Fragment) OS=Homo sapiens GN=HK1 PE=3 SV=1	0.740938	0.991162	0.980764	0.60405	0.481431	1.23349	0.904288	0.77299	0.131298
B1AVU8	B1AVU8	Prosaposin OS=Homo sapiens GN=PSAP PE=4 SV=1	1.81606	3.25298	3.38768	2.37394	2.89005	2.99837	2.81891	2.75412	0.064787
B1PS43	B1PS43	Myosin heavy chain 11 smooth muscle isoform OS=Homo sapiens GN=MYH11 PE=2 SV=1	0.777461	0.748899	0.427005	0.380345	0.711055	0.203088	0.651122	0.431496	0.219625
B2R5P6	B2R5P6	Uncharacterized protein OS=Homo sapiens GN=TXNRD1 PE=2 SV=1	1.34236	1.00513	1.21011	1.80087	1.42084	1.41597	1.18587	1.54589	-0.360026
B2R603	B2R603	Uncharacterized protein OS=Homo sapiens GN=HNRNPC PE=2 SV=1	0.416356	0.580384	0.933912	0.377556	0.744205	0.4411	0.643551	0.520954	0.122597
B2RCS5	B2RCS5	Actinin, alpha 2, isoform CRA_b OS=Homo sapiens GN=ACTN2 PE=2 SV=1	0.763189	0.401238	0.326947	1.18044	0.6423	1.53922	0.497125	1.12065	-0.623528
B2RDM2	B2RDM2	HCG1811539, isoform CRA_b OS=Homo sapiens GN=MUTED PE=2 SV=1	0.622505	0.6464	1.10714	1.35694	1.6636	0.706428	0.792017	1.24232	-0.450307
B2REB8	B2REB8	SET nuclear oncogene OS=Homo sapiens GN=SET PE=3 SV=1	0.506208	0.604299	0.546651	0.658357	0.266627	0.537228	0.552386	0.487404	0.0649816
B2ZZ83	B2ZZ83	Filamin B OS=Homo sapiens GN=FLNB PE=2 SV=1	2.31042	2.16589	1.60999	1.98878	1.77698	2.087	2.02876	1.95092	0.0778424
B3KPU1	B3KPU1	Uncharacterized protein OS=Homo sapiens GN=GNB2 PE=2 SV=1	-0.231708	1.59888	1.35529	-0.273413	2.17725	0.751543	0.907485	0.885128	0.0223572
B3KPW9	B3KPW9	Tubulin, alpha 8, isoform CRA_b OS=Homo sapiens GN=TUBA8 PE=2 SV=1	0.964444		0.270076	0.501414		1.1294	0.61726	0.815407	-0.198147
B3KQ13	B3KQ13	Uncharacterized protein OS=Homo sapiens GN=CCBL2 PE=2 SV=1		0.788567	0.107011		0.0368169	-0.557494	0.447789	-0.260339	0.708128
B3KQI8	B3KQI8	Uncharacterized protein OS=Homo sapiens GN=NT5E PE=2 SV=1	0.397574	1.44249	0.453024	1.08109	1.43704	1.08592	0.764363	1.20135	-0.436988
B3KQT9	B3KQT9	Uncharacterized protein OS=Homo sapiens GN=PDIA3 PE=2 SV=1	0.686087	0.618369	1.14197	1.25439	1.46338	0.734574	0.815475	1.15078	-0.335306
B3KR14	B3KR14	Uncharacterized protein OS=Homo sapiens GN=PLCD1 PE=2 SV=1	0.79754	0.17741	0.122839	0.535729	-1.23657	0.630056	0.36593	-0.0235947	0.389524
B3KRQ1	B3KRQ1	Uncharacterized protein OS=Homo sapiens GN=ANXA2 PE=2 SV=1	0.668528	0.343743	0.545613	0.690153	0.256979	0.674373	0.519295	0.540502	-0.0212069
B3KRY5	B3KRY5	Uncharacterized protein OS=Homo sapiens GN=PTRF PE=2 SV=1	0.153287	0.494503	0.424603	0.422996	0.774052	0.166781	0.357464	0.45461	-0.0971456
B3KS31	B3KS31	Tubulin, beta 6, isoform CRA_a OS=Homo sapiens GN=TUBB6 PE=2 SV=1	1.30089	0.662485	0.447063	0.810195	-0.0666562	1.58984	0.803478	0.777793	0.0256848
B3KSI4	B3KSI4	Uncharacterized protein OS=Homo sapiens GN=TKT PE=2 SV=1	4.47068	4.05336	3.49287	4.27317	4.51633	3.90559	4.00563	4.2317	-0.226064
B3KTG2	B3KTG2	Uncharacterized protein OS=Homo sapiens GN=PALLD PE=2 SV=1	0.673554	0.896859	0.208119	0.700615	0.777087	1.03625	0.592844	0.837985	-0.245141
B3KTM6	B3KTM6	Ribosomal protein L5, isoform CRA_b OS=Homo sapiens GN=RPL5 PE=2 SV=1	0.515282	0.711714	0.18954	-0.517775	1.24716	-0.379895	0.472179	0.116497	0.355681
B3KTM9	B3KTM9	Uncharacterized protein OS=Homo sapiens GN=FSCN1 PE=2 SV=1	1.10351	-0.166962	-0.120302	1.79773	0.369204	1.51975	0.272084	1.22889	-0.956811
B3KTZ0	B3KTZ0	Guanine nucleotide binding protein (G protein), alpha inhibiting activity polypeptide 2, isoform CRA_e OS=Homo sapiens GN=GNAI2 PE=2 SV=1	-0.0619874	-0.268349	0.266992	0.465132	0.831863	0.787837	-0.0211147	0.694944	-0.716058
B3KUF8	B3KUF8	Uncharacterized protein OS=Homo sapiens GN=VAT1 PE=2 SV=1	0.274159	0.573147		-1.85195	0.0195713		0.423653	-0.916189	1.33984
B3KUK2	B3KUK2	Superoxide dismutase OS=Homo sapiens GN=SOD2 PE=2 SV=1	0.89397	1.02114	1.43825	1.14015	0.661871	1.03918	1.11779	0.947066	0.170719
B3KUS2	B3KUS2	Uncharacterized protein OS=Homo sapiens GN=HSPA2 PE=2 SV=1	0.952787	0.868634	0.562337	0.665172	0.702227	0.548391	0.794586	0.638597	0.155989
B3KUU2	B3KUU2	UDP-glucose dehydrogenase, isoform CRA_b OS=Homo sapiens GN=UGDH PE=2 SV=1	0.782152	0.695622	0.0666307	0.588658	0.0542702	0.375027	0.514801	0.339319	0.175483
B3KV55	B3KV55	Glutamate dehydrogenase 1, isoform CRA_a OS=Homo sapiens GN=GLUD1 PE=2 SV=1	0.568894	0.520748	0.839121	0.55665	0.519117	0.0729127	0.642921	0.382893	0.260028
B3KVC9	B3KVC9	Uncharacterized protein OS=Homo sapiens GN=CSRP1 PE=2 SV=1	0.619578	-0.00672106	-0.213829	-0.237539	-0.371792	0.523612	0.133009	-0.0285732	0.161582
B3KW71	B3KW71	Quinoid dihydropteridine reductase, isoform CRA_e OS=Homo sapiens GN=QDPR PE=2 SV=1	1.10864	0.0889689	-0.0127901	0.334436	-0.175109	-0.205557	0.394938	-0.0154098	0.410348
B3KWS3	B3KWS3	Uncharacterized protein OS=Homo sapiens GN=PLOD2 PE=2 SV=1	0.240434	0.351315	0.164713	0.531292	0.771402	0.513658	0.252154	0.605451	-0.353297
B3KX72	B3KX72	Uncharacterized protein OS=Homo sapiens GN=HNRNPU PE=2 SV=1	1.04711	0.475391	1.02835	0.960397	-0.348421	1.44066	0.850284	0.684211	0.166073
B3KY56	B3KY56	Uncharacterized protein OS=Homo sapiens GN=ESYT1 PE=2 SV=1		0.87371	1.52171		-0.345285	-0.17667	1.19771	-0.260978	1.45869
B3SXQ8	B3SXQ8	Collapsin response mediator protein 4 long variant OS=Homo sapiens GN=LCRMP PE=2 SV=1	0.623417	-0.0185322	-0.424534	0.740189	0.401725	0.512191	0.0601171	0.551368	-0.491251
B4DDD6	B4DDD6	Uncharacterized protein OS=Homo sapiens GN=DBNL PE=2 SV=1	0.953263	0.248106	0.220763	0.493482	0.86116	0.304623	0.474044	0.553088	-0.0790441
B4DDD7	B4DDD7	Uncharacterized protein OS=Homo sapiens GN=PDHB PE=2 SV=1	0.55804	0.666173	0.556729	0.484961	0.702408	-0.0304341	0.593647	0.385645	0.208003
B4DDE4	B4DDE4	Ubiquitin-activating enzyme E1 OS=Homo sapiens GN=UBA1 PE=2 SV=1	0.736253	0.365166	0.195037	0.610036	-0.397265	1.6597	0.432152	0.624158	-0.192006
B4DDF9	B4DDF9	Uncharacterized protein OS=Homo sapiens GN=ANXA4 PE=2 SV=1	1.51989	1.02271	0.666871	1.42777	0.344217	0.534026	1.06982	0.76867	0.301153
B4DDP6	B4DDP6	Uncharacterized protein OS=Homo sapiens GN=DBNL PE=2 SV=1	1.45258	0.248667	0.220763	0.686443	0.113151	0.304623	0.640672	0.368072	0.2726
B4DDU5	B4DDU5	Uncharacterized protein OS=Homo sapiens GN=DBNL PE=2 SV=1	0.918023	0.210512	0.252594	0.493482	1.1898	-0.0102908	0.460376	0.557662	-0.097286
B4DDW1	B4DDW1	Uncharacterized protein OS=Homo sapiens GN=METTL7A PE=2 SV=1		0.935549	0.617459		-0.611093	0.54159	0.776504	-0.0347514	0.811255
B4DE01	B4DE01	Uncharacterized protein OS=Homo sapiens GN=CAPZA2 PE=2 SV=1	0.551083	0.431112	0.731351	1.12919	1.19613	1.79754	0.571182	1.37429	-0.803106
B4DE78	B4DE78	Uncharacterized protein OS=Homo sapiens GN=YWHAG PE=2 SV=1	1.70091	1.21842	1.14711	1.66727	1.09526	2.14343	1.35548	1.63532	-0.279838
B4DEC3	B4DEC3	Uncharacterized protein OS=Homo sapiens GN=ACO2 PE=2 SV=1	1.92308	0.967939	0.920137	2.21838	0.651439	-0.169299	1.27039	0.900174	0.370211
B4DEF7	B4DEF7	Uncharacterized protein OS=Homo sapiens GN=HSPA5 PE=2 SV=1	0.112372	0.271036	0.564221	0.875175	1.36594	0.215354	0.315876	0.818824	-0.502948
B4DEL6	B4DEL6	Uncharacterized protein OS=Homo sapiens GN=PLD3 PE=2 SV=1	0.0401266	0.714081	0.38392		1.38811	-0.209523	0.379376	0.589292	-0.209917
B4DEM2	B4DEM2	Uncharacterized protein OS=Homo sapiens GN=DBNL PE=2 SV=1	0.918023	0.210512	0.252594	0.493482	1.1898	-0.0102908	0.460376	0.557662	-0.097286
B4DEM7	B4DEM7	Uncharacterized protein OS=Homo sapiens GN=CCT8 PE=2 SV=1	0.805999	0.724515	0.183341	0.165732	-0.415921	0.822255	0.571285	0.190689	0.380596
B4DEY6	B4DEY6	Uncharacterized protein OS=Homo sapiens GN=LMCD1 PE=2 SV=1	1.48617	0.103628	0.533093		0.10531	0.212712	0.707629	0.159011	0.548618
B4DF38	B4DF38	Uncharacterized protein OS=Homo sapiens GN=PAFAH1B1 PE=2 SV=1	0.507572	0.109959	-0.0873694	0.172266	-0.173632	0.451146	0.17672	0.149926	0.026794
B4DFF1	B4DFF1	Uncharacterized protein OS=Homo sapiens GN=HNRNPK PE=2 SV=1	0.576315	0.847774	1.59905	1.25094	1.091	1.07654	1.00771	1.13949	-0.131781
B4DFH6	B4DFH6	Uncharacterized protein OS=Homo sapiens GN=TUBB4 PE=2 SV=1	1.11621	0.646336	0.447063	1.20405	0.191658	1.08577	0.736536	0.827158	-0.0906221
B4DFK6	B4DFK6	Uncharacterized protein OS=Homo sapiens GN=CNN3 PE=2 SV=1	1.04432	0.210498	0.273169	1.13898	0.770221	0.220253	0.50933	0.709817	-0.200487
B4DFK7	B4DFK7	Carbonyl reductase 1, isoform CRA_c OS=Homo sapiens GN=CBR1 PE=2 SV=1	1.27188	0.281839	0.00781315	0.298996	-0.537852	0.701309	0.520511	0.154151	0.366361
B4DFK9	B4DFK9	Uncharacterized protein OS=Homo sapiens GN=HNRNPH2 PE=2 SV=1	0.107851	0.636967	0.365596	0.387583	0.470862	0.309033	0.370138	0.389159	-0.0190211
B4DFL2	B4DFL2	Uncharacterized protein OS=Homo sapiens GN=IDH2 PE=2 SV=1	0.226057	0.476132	0.401375	0.398707	0.0820484	0.108765	0.367855	0.196507	0.171348
B4DFR2	B4DFR2	Uncharacterized protein OS=Homo sapiens GN=DYNLRB1 PE=2 SV=1	-0.0557737	-0.386938	-0.00409586	0.274362	0.842856	0.583864	-0.148936	0.567027	-0.715963
B4DG39	B4DG39	Glucose-6-phosphate isomerase OS=Homo sapiens GN=GPI PE=2 SV=1	1.73742	0.958072	0.983429	1.52402	0.754546	1.65817	1.22631	1.31224	-0.0859363
B4DG62	B4DG62	Uncharacterized protein OS=Homo sapiens GN=HK1 PE=2 SV=1	0.63312	0.801409	0.926855	0.576021	0.65786	0.991478	0.787128	0.741787	0.0453417
B4DG80	B4DG80	Uncharacterized protein OS=Homo sapiens GN=LMCD1 PE=2 SV=1	1.48617	0.103628	0.533093		0.10531	0.212712	0.707629	0.159011	0.548618
B4DGB4	B4DGB4	Uncharacterized protein OS=Homo sapiens GN=PLS3 PE=2 SV=1	0.738187	0.1657	-0.243363	0.241664	-0.0229525	0.53111	0.220175	0.24994	-0.0297656
B4DGE4	B4DGE4	Uncharacterized protein OS=Homo sapiens GN=ALDH4A1 PE=2 SV=1	0.315574	0.685451		-0.0174557	0.451381	-0.539552	0.500513	-0.0352088	0.535722
B4DGN5	B4DGN5	Uncharacterized protein OS=Homo sapiens GN=GLUD1 PE=2 SV=1	0.583549	0.520748	0.798884	0.555207	0.519117	0.0729127	0.634394	0.382412	0.251982
B4DGQ0	B4DGQ0	Uncharacterized protein OS=Homo sapiens GN=LASP1 PE=2 SV=1	-0.172141	0.00440821	-0.357747	-0.311024	0.171734	0.182388	-0.17516	0.0143658	-0.189526
B4DGT1	B4DGT1	Uncharacterized protein OS=Homo sapiens GN=SPTAN1 PE=2 SV=1	0.684348	0.794969	0.907563	0.734552	0.601993	1.01583	0.795626	0.784127	0.0114999
B4DH37	B4DH37	Uncharacterized protein OS=Homo sapiens GN=STX7 PE=2 SV=1	0.112842	0.259196	0.768083	0.371121	1.34614	-0.281043	0.38004	0.478739	-0.0986989
B4DHC4	B4DHC4	Uncharacterized protein OS=Homo sapiens GN=YWHAG PE=2 SV=1	1.36913	1.00667	1.13822	1.62225	1.57434	1.94529	1.17134	1.71396	-0.542618
B4DHG0	B4DHG0	Uncharacterized protein OS=Homo sapiens GN=DLD PE=2 SV=1	1.51533	0.513323	0.950506		0.231768	-0.253743	0.993054	-0.0109878	1.00404
B4DHM5	B4DHM5	Phosphoglycerate kinase OS=Homo sapiens GN=PGK1 PE=2 SV=1	1.32721	0.498859	0.614123	1.49245	0.655504	1.71143	0.813397	1.28646	-0.473067
B4DHP2	B4DHP2	Uncharacterized protein OS=Homo sapiens GN=PTGES3 PE=2 SV=1	0.66268	0.0222676	-0.549497	0.315247	-0.0563757	0.489471	0.0451501	0.249448	-0.204297
B4DHP5	B4DHP5	Uncharacterized protein OS=Homo sapiens GN=HSPA6 PE=2 SV=1	0.684965	0.6103	0.939234	0.598796	0.480545	1.2951	0.744833	0.791479	-0.0466463
B4DHP6	B4DHP6	Uncharacterized protein OS=Homo sapiens GN=SCP2 PE=2 SV=1	2.05178	-0.764574	-0.794709	1.95955	-1.0894	-0.484389	0.164165	0.128587	0.0355781
B4DHX4	B4DHX4	Uncharacterized protein OS=Homo sapiens GN=GDI1 PE=2 SV=1	0.552264	-0.850877	-0.186526	0.312891	0.678418	-0.385822	-0.161713	0.201829	-0.363541
B4DI60	B4DI60	Uncharacterized protein OS=Homo sapiens GN=PLS3 PE=2 SV=1	0.723728	0.162423	-0.581899	0.264957	-0.0471916	0.371048	0.101417	0.196271	-0.0948539
B4DI61	B4DI61	Uncharacterized protein OS=Homo sapiens GN=CYR61 PE=2 SV=1	-0.135358	0.0230056	0.0534623	0.534938	1.21557	-0.0852122	-0.0196299	0.555098	-0.574728
B4DIC4	B4DIC4	Uncharacterized protein OS=Homo sapiens GN=LASP1 PE=2 SV=1	0.449364	0.392371	0.198262	0.443613	1.11611	0.691031	0.346666	0.750253	-0.403588
B4DIF2	B4DIF2	Uncharacterized protein OS=Homo sapiens GN=SERPINE2 PE=2 SV=1	0.368282		0.840711	1.44953		1.83562	0.604496	1.64258	-1.03808
B4DIT7	B4DIT7	Uncharacterized protein OS=Homo sapiens GN=TGM2 PE=2 SV=1	1.35926	-0.262172	-0.505099	1.36323	0.859215	1.08334	0.19733	1.10193	-0.904596
B4DJ43	B4DJ43	Uncharacterized protein OS=Homo sapiens GN=TUBB4 PE=2 SV=1	1.20888	0.630187	0.463212	1.12039	0.290865	0.955026	0.767426	0.788761	-0.0213354
B4DJ87	B4DJ87	Uncharacterized protein OS=Homo sapiens GN=PRMT1 PE=2 SV=1	0.49041	0.84315	0.398966	0.306849	0.0353977	0.505191	0.577509	0.282479	0.29503
B4DJE7	B4DJE7	Uncharacterized protein OS=Homo sapiens GN=ACADM PE=2 SV=1	0.126083	0.585822	0.194081	0.65518	1.44338	0.0800975	0.301995	0.726219	-0.424223
B4DJV2	B4DJV2	Citrate synthase OS=Homo sapiens GN=CS PE=2 SV=1	0.21145	0.70355	0.815353	-7.76e-05	0.291975	-0.0997058	0.576784	0.0640639	0.512721
B4DK30	B4DK30	Uncharacterized protein OS=Homo sapiens GN=EFTUD2 PE=2 SV=1	0.948117	0.643721	0.973131	1.13956	0.58483	0.355903	0.85499	0.69343	0.161559
B4DK69	B4DK69	Uncharacterized protein OS=Homo sapiens GN=AKR1C2 PE=2 SV=1	2.20825	1.53818	1.53821	0.811647	0.415556	1.10043	1.76155	0.775878	0.985672
B4DKE7	B4DKE7	Uncharacterized protein OS=Homo sapiens GN=HEXA PE=2 SV=1	0.288387		0.275684	0.564522		-0.0553496	0.282035	0.254586	0.0274493
B4DKJ3	B4DKJ3	Uncharacterized protein OS=Homo sapiens GN=COMP PE=2 SV=1	-0.823851	0.354686	2.03248	0.465767	0.785627	2.07071	0.521104	1.10737	-0.586265
B4DKQ2	B4DKQ2	L-lactate dehydrogenase OS=Homo sapiens GN=LDHA PE=2 SV=1	1.89095	0.779328	0.46124	1.37241	1.07338	0.683313	1.04384	1.04304	0.000804466
B4DKR9	B4DKR9	Uncharacterized protein OS=Homo sapiens GN=AKR1C2 PE=2 SV=1	1.90991	1.61665	1.66051	0.822292	0.415556	0.0710328	1.72902	0.436293	1.29273
B4DL14	B4DL14	ATP synthase gamma chain OS=Homo sapiens GN=ATP5C1 PE=2 SV=1	1.20294		0.471188	0.0288686		-0.294035	0.837065	-0.132583	0.969648
B4DL20	B4DL20	Superoxide dismutase OS=Homo sapiens GN=SOD2 PE=2 SV=1	0.76179	1.02114	1.35277	1.117	0.661871	0.680999	1.04524	0.819957	0.225278
B4DL37	B4DL37	Aldo-keto reductase family 1, member C3 (3-alpha hydroxysteroid dehydrogenase, type II), isoform CRA_c OS=Homo sapiens GN=AKR1C3 PE=2 SV=1	1.44617	1.16783	0.800814	0.854012	0.588016	0.300061	1.13827	0.580696	0.557574
B4DL87	B4DL87	Uncharacterized protein OS=Homo sapiens GN=HSPB1 PE=2 SV=1	2.3436	2.82221	2.78265	2.61335	2.82049	3.29439	2.64949	2.90941	-0.259924
B4DLA9	B4DLA9	Histone H2B OS=Homo sapiens GN=HIST2H2BF PE=2 SV=1	0.266968	1.12604	1.44864	1.0935	1.41823	1.17229	0.947217	1.228	-0.280787
B4DLJ0	B4DLJ0	Uncharacterized protein OS=Homo sapiens GN=ALDH1B1 PE=2 SV=1	-0.0231151	0.147906	0.597619	0.759237	0.529524	0.789299	0.240803	0.692687	-0.451883
B4DLR2	B4DLR2	Uncharacterized protein OS=Homo sapiens GN=FAP PE=2 SV=1	0.249778	0.634363	0.3977	0.487368	0.0766451	0.595538	0.427281	0.386517	0.0407637
B4DLU5	B4DLU5	Uncharacterized protein OS=Homo sapiens GN=DDX3X PE=2 SV=1	1.05601		0.583817	-0.451618		0.226591	0.819914	-0.112514	0.932428
B4DM63	B4DM63	Uncharacterized protein OS=Homo sapiens GN=ARPC3 PE=2 SV=1	1.21486	0.659727	0.591619	1.3412	0.375194	1.85211	0.82207	1.1895	-0.367431
B4DM74	B4DM74	Uncharacterized protein OS=Homo sapiens GN=RPL18A PE=2 SV=1	0.971344	0.593907	0.551673	-0.813199	0.864093	0.479651	0.705641	0.176849	0.528793
B4DM82	B4DM82	Peptidyl-prolyl cis-trans isomerase OS=Homo sapiens GN=PPIA PE=2 SV=1	0.818575	0.250824	-0.136331	0.644068	0.198242	0.180486	0.311023	0.340932	-0.0299094
B4DMC6	B4DMC6	Uncharacterized protein OS=Homo sapiens GN=EEF2 PE=2 SV=1	1.13437	0.136398	-0.755794	0.724191	-0.502902	0.667474	0.171658	0.296255	-0.124597
B4DMJ2	B4DMJ2	Uncharacterized protein OS=Homo sapiens GN=RPL4 PE=2 SV=1	-0.149672		0.665784	-0.797216		-0.683575	0.258056	-0.740396	0.998451
B4DMQ5	B4DMQ5	Uncharacterized protein OS=Homo sapiens GN=RAB2A PE=2 SV=1	0.477516	0.411793	0.500874	-0.457691	-0.571848	-0.0771282	0.463394	-0.368889	0.832284
B4DMT8	B4DMT8	Uncharacterized protein OS=Homo sapiens GN=YWHAQ PE=2 SV=1	2.02293	1.12152	1.11041	1.68504	0.530323	1.42252	1.41829	1.21263	0.20566
B4DMY4	B4DMY4	Uncharacterized protein OS=Homo sapiens GN=CTSB PE=2 SV=1	0.131124	0.170587	0.510218	0.672943	0.571556	0.597906	0.270643	0.614135	-0.343492
B4DN25	B4DN25	Uncharacterized protein OS=Homo sapiens GN=UGDH PE=2 SV=1	0.782152	0.695622	0.0666307	0.588658	0.0542702	0.375027	0.514801	0.339319	0.175483
B4DN52	B4DN52	Uncharacterized protein OS=Homo sapiens GN=LIMA1 PE=2 SV=1	0.182286	0.706458	0.633459	0.609734	0.0894087	0.764197	0.507401	0.48778	0.0196211
B4DN60	B4DN60	Uncharacterized protein OS=Homo sapiens GN=NARS PE=2 SV=1	0.697901	-0.195299	0.0355398	0.697337	0.607066	0.725709	0.179381	0.676704	-0.497323
B4DN87	B4DN87	Uncharacterized protein OS=Homo sapiens GN=SERPINH1 PE=2 SV=1	0.846494	0.655182	1.28356	0.263876	-0.0233881	0.974565	0.928411	0.405018	0.523393
B4DN88	B4DN88	Uncharacterized protein OS=Homo sapiens GN=RBMS1 PE=2 SV=1	0.189743	0.126002	0.196259	-0.0860239	0.428721	-0.162357	0.170668	0.0601132	0.110555
B4DNE4	B4DNE4	Uncharacterized protein OS=Homo sapiens GN=SEPT7 PE=2 SV=1	0.490367	0.48534	0.407963	0.234743	0.560266	0.173634	0.461223	0.322881	0.138342
B4DNJ6	B4DNJ6	Uncharacterized protein OS=Homo sapiens GN=STRAP PE=2 SV=1	0.918266	0.388515	0.170097	0.493216	-0.384322	0.520948	0.492292	0.209947	0.282345
B4DNM8	B4DNM8	Uncharacterized protein OS=Homo sapiens GN=LEPRE1 PE=2 SV=1	0.360778	0.74004	0.704008	0.276372	0.481626	-0.0381929	0.601609	0.239935	0.361674
B4DNR3	B4DNR3	Uncharacterized protein OS=Homo sapiens GN=ABHD14B PE=2 SV=1	0.860756	-0.0432873	-0.185934	-0.100009	-0.00168429	0.0721356	0.210511	-0.00985261	0.220364
B4DP11	B4DP11	Uncharacterized protein OS=Homo sapiens GN=PTGES3 PE=2 SV=1	0.66268	0.0222676	-0.549497	0.315247	-0.0563757	0.489471	0.0451501	0.249448	-0.204297
B4DP21	B4DP21	Prostaglandin E synthase 3 (Cytosolic), isoform CRA_d OS=Homo sapiens GN=PTGES3 PE=2 SV=1	0.66268	0.0222676	-0.549497	0.315247	-0.0563757	0.489471	0.0451501	0.249448	-0.204297
B4DP54	B4DP54	Uncharacterized protein OS=Homo sapiens GN=TUBB6 PE=2 SV=1	1.36939	0.487232	0.463212	1.09408	0.232778	0.813027	0.773279	0.713294	0.0599848
B4DP82	B4DP82	Uncharacterized protein OS=Homo sapiens GN=RPL4 PE=2 SV=1	0.454725	0.462985	0.983345	-0.239023	0.805894	0.539683	0.633685	0.368851	0.264834
B4DP96	B4DP96	Uncharacterized protein OS=Homo sapiens GN=ANPEP PE=2 SV=1	1.12829	1.07919	1.078	1.65024	1.54213	1.46726	1.09516	1.55321	-0.45805
B4DPJ6	B4DPJ6	Uncharacterized protein OS=Homo sapiens GN=TPD52L2 PE=2 SV=1	0.370434		0.387854	0.381247		0.721584	0.379144	0.551416	-0.172272
B4DPJ8	B4DPJ8	Uncharacterized protein OS=Homo sapiens GN=CCT6A PE=2 SV=1	0.444015	0.892355	-0.00315127	-0.226261	-0.695434	0.53821	0.444406	-0.127828	0.572234
B4DPU0	B4DPU0	Uncharacterized protein OS=Homo sapiens GN=PLA2G15 PE=2 SV=1	0.167902	0.906412	0.870622	0.317281	0.739891	-0.264929	0.648312	0.264081	0.384231
B4DPU3	B4DPU3	Uncharacterized protein OS=Homo sapiens GN=EEF2 PE=2 SV=1	1.2692	0.584607	-0.0678909	1.04946	0.285519	0.626054	0.595305	0.653679	-0.0583739
B4DPV0	B4DPV0	Uncharacterized protein OS=Homo sapiens GN=PGM1 PE=2 SV=1	1.12599	0.0266028	-0.153576	0.583353	-0.0843962	0.445853	0.333005	0.314937	0.0180682
B4DPZ7	B4DPZ7	Uncharacterized protein OS=Homo sapiens GN=NEXN PE=2 SV=1	0.849976	1.76653	0.496412	1.23812	2.42786	0.292798	1.03764	1.31959	-0.281955
B4DQH4	B4DQH4	Uncharacterized protein OS=Homo sapiens GN=CCT8 PE=2 SV=1	0.874369	0.724515	0.292528	0.028991	-0.415921	0.723793	0.630471	0.112288	0.518183
B4DQI8	B4DQI8	Uncharacterized protein OS=Homo sapiens GN=RAP1B PE=2 SV=1		1.58195	1.57654		1.67459	0.809911	1.57924	1.24225	0.336993
B4DQJ8	B4DQJ8	6-phosphogluconate dehydrogenase, decarboxylating OS=Homo sapiens GN=PGD PE=2 SV=1	1.57323	0.71017	0.768692	0.578437	0.265249	0.49283	1.01736	0.445505	0.571859
B4DQR8	B4DQR8	Uncharacterized protein OS=Homo sapiens GN=ZYX PE=2 SV=1	0.384093	0.464971	0.653168	0.474581	1.12718	0.320615	0.500744	0.640792	-0.140048
B4DQV7	B4DQV7	Uncharacterized protein OS=Homo sapiens GN=NPC2 PE=2 SV=1	1.43545	1.596	1.62513	1.52747	1.86705	0.955122	1.5522	1.44988	0.102316
B4DQX7	B4DQX7	Uncharacterized protein OS=Homo sapiens GN=ZYX PE=2 SV=1	0.384093	0.486321	0.577743	0.474581	1.12416	0.497231	0.482719	0.698656	-0.215937
B4DR31	B4DR31	Uncharacterized protein OS=Homo sapiens GN=DPYSL2 PE=2 SV=1	1.58753	0.787797	0.714207	1.24834	0.768077	1.3092	1.02984	1.10854	-0.0786972
B4DR52	B4DR52	Histone H2B OS=Homo sapiens GN=HIST2H2BF PE=2 SV=1	0.266968	1.12604	1.44864	1.0935	1.41823	1.17229	0.947217	1.228	-0.280787
B4DR63	B4DR63	Uncharacterized protein OS=Homo sapiens GN=PSMC1 PE=2 SV=1	0.818228	0.836541	0.284792	0.379243	0.139175	-0.0488023	0.64652	0.156538	0.489982
B4DR87	B4DR87	Uncharacterized protein OS=Homo sapiens GN=PLOD1 PE=2 SV=1	1.10555	0.945366	1.50765	0.911056	1.02267	1.74027	1.18619	1.22466	-0.0384764
B4DR91	B4DR91	Uncharacterized protein OS=Homo sapiens GN=PSMC6 PE=2 SV=1	0.938276		0.331738	0.663431		0.567116	0.635007	0.615274	0.0197332
B4DRR8	B4DRR8	Uncharacterized protein OS=Homo sapiens GN=COL6A1 PE=2 SV=1	1.62127	0.484953	1.63113	0.17426	0.175477	1.30581	1.24579	0.551849	0.693937
B4DRT4	B4DRT4	Uncharacterized protein OS=Homo sapiens GN=PEBP1 PE=2 SV=1	1.23515	0.166261	-0.300397	0.295792	-0.390912	0.0426884	0.367003	-0.0174772	0.38448
B4DS13	B4DS13	Uncharacterized protein OS=Homo sapiens GN=EIF4B PE=2 SV=1	0.853459	0.797009	0.303784	0.833522	0.759011	0.583263	0.651418	0.725265	-0.0738477
B4DSE2	B4DSE2	Uncharacterized protein OS=Homo sapiens GN=TPP1 PE=2 SV=1	-0.0984225	0.435823	0.595433	0.305929	0.687992	0.556554	0.310945	0.516825	-0.205881
B4DSQ1	B4DSQ1	Microtubule-associated protein OS=Homo sapiens GN=MAP4 PE=2 SV=1	-0.13747	-0.233556	-0.228808	-0.619422	0.415578	-0.42632	-0.199945	-0.210055	0.0101102
B4DSU6	B4DSU6	Uncharacterized protein OS=Homo sapiens GN=HNRNPC PE=2 SV=1	0.347518	0.519746	0.975473	0.370275	0.634041	1.10998	0.614246	0.704766	-0.0905207
B4DSZ6	B4DSZ6	Uncharacterized protein OS=Homo sapiens GN=IDH2 PE=2 SV=1	0.214368	0.476132	0.401375	0.387018	0.0820484	0.108765	0.363959	0.19261	0.171348
B4DT43	B4DT43	Uncharacterized protein OS=Homo sapiens GN=ETFA PE=2 SV=1	0.585023	0.688411	0.856506	0.228013	-0.173276	-0.624605	0.70998	-0.189956	0.899936
B4DT69	B4DT69	Dihydrolipoyl dehydrogenase OS=Homo sapiens GN=DLD PE=2 SV=1		0.698429	1.05267		0.22115	0.209679	0.875552	0.215414	0.660137
B4DTA6	B4DTA6	Uncharacterized protein OS=Homo sapiens GN=RAB35 PE=2 SV=1	0.502986	0.367739	0.443743	0.0467269	0.254549	-0.15422	0.438156	0.0490184	0.389138
B4DTC3	B4DTC3	Uncharacterized protein OS=Homo sapiens GN=HNRNPD PE=2 SV=1	0.174538	4.16192	0.309879	0.31467	5.37821	-0.59244	1.54878	1.70015	-0.151366
B4DTG2	B4DTG2	Uncharacterized protein OS=Homo sapiens PE=2 SV=1	0.664521	0.431714	0.295765	-0.300221	-0.131786	0.722537	0.464	0.0968432	0.367157
B4DTI0	B4DTI0	Uncharacterized protein OS=Homo sapiens GN=ACTR3 PE=2 SV=1	0.505495	-0.1117	-0.217599	0.413471	0.217293	0.0986738	0.058732	0.243146	-0.184414
B4DTM7	B4DTM7	Uncharacterized protein OS=Homo sapiens GN=VCL PE=2 SV=1	0.452293		-0.337526	0.147471		0.555675	0.0573835	0.351573	-0.29419
B4DTT0	B4DTT0	Uncharacterized protein OS=Homo sapiens GN=GNS PE=2 SV=1	-0.0157573	0.0616033	0.662687	0.739373	1.52715	0.229211	0.236178	0.83191	-0.595732
B4DTT5	B4DTT5	Uncharacterized protein OS=Homo sapiens GN=FSTL1 PE=2 SV=1	0.00983049	0.226526	0.645248	0.494987	1.16656	-0.344385	0.293868	0.439054	-0.145185
B4DTU0	B4DTU0	Uncharacterized protein OS=Homo sapiens GN=ALCAM PE=2 SV=1	-0.080489	-0.178811	-0.0474733	0.302046	1.16307	-0.0177332	-0.102258	0.482462	-0.58472
B4DU91	B4DU91	Uncharacterized protein OS=Homo sapiens GN=EPN1 PE=2 SV=1	0.466655	0.355032	0.616622	0.397123	0.320739	0.986399	0.479436	0.568087	-0.0886509
B4DUA5	B4DUA5	Uncharacterized protein OS=Homo sapiens GN=P4HB PE=2 SV=1	7.18051	7.21244	4.42267	7.84645	7.68324	4.6889	6.27187	6.73953	-0.467656
B4DUD1	B4DUD1	Uncharacterized protein OS=Homo sapiens GN=PLA2G15 PE=2 SV=1	0.167902	0.906412	0.870622	0.317281	0.739891	-0.264929	0.648312	0.264081	0.384231
B4DUI8	B4DUI8	Uncharacterized protein OS=Homo sapiens GN=ACTA2 PE=2 SV=1	3.10623	3.00572	3.38846	3.65816	4.72099	3.61273	3.1668	3.99729	-0.830487
B4DUN2	B4DUN2	Malate dehydrogenase OS=Homo sapiens GN=MDH1 PE=2 SV=1	1.60727	0.661043	0.477932	1.04537	0.82167	0.271675	0.915413	0.712905	0.202508
B4DUR8	B4DUR8	Uncharacterized protein OS=Homo sapiens GN=CCT3 PE=2 SV=1	0.897301	0.53198	0.547453	-0.296112	0.219834	-0.124978	0.658911	-0.0670855	0.725997
B4DUU6	B4DUU6	Pyruvate kinase OS=Homo sapiens GN=PKM2 PE=2 SV=1	1.32422	0.803352	0.529486	1.35554	0.442312	1.63106	0.885686	1.14297	-0.257284
B4DUX6	B4DUX6	Uncharacterized protein OS=Homo sapiens GN=CNN1 PE=2 SV=1	0.059649	-0.284191	-0.358117	1.18979	1.05115	0.915923	-0.19422	1.05229	-1.24651
B4DW08	B4DW08	Uncharacterized protein OS=Homo sapiens GN=ACO2 PE=2 SV=1	1.92308	0.967939	0.920137	2.21838	0.651439	-0.169299	1.27039	0.900174	0.370211
B4DW52	B4DW52	Uncharacterized protein OS=Homo sapiens GN=ACTB PE=2 SV=1	3.06037	3.02229	3.45247	3.65816	3.9209	3.64764	3.17838	3.74223	-0.563858
B4DW73	B4DW73	Uncharacterized protein OS=Homo sapiens GN=PCK2 PE=2 SV=1	-0.0367452	0.462552	0.640118	-0.671376	0.0604976	-1.10193	0.355308	-0.570937	0.926246
B4DW74	B4DW74	Uncharacterized protein OS=Homo sapiens GN=RAP1B PE=2 SV=1		1.58195	1.57654		1.67459	0.809911	1.57924	1.24225	0.336993
B4DW75	B4DW75	Uncharacterized protein OS=Homo sapiens GN=EFEMP1 PE=2 SV=1	0.434902	0.472644	0.621817	0.922867	0.813073	0.968409	0.509788	0.90145	-0.391662
B4DW94	B4DW94	Uncharacterized protein OS=Homo sapiens GN=RAP1B PE=2 SV=1		1.58195	1.57654		1.67459	0.809911	1.57924	1.24225	0.336993
B4DX20	B4DX20	Uncharacterized protein OS=Homo sapiens GN=CCT6B PE=2 SV=1	1.14357	0.892355	0.299655	-0.166904	-0.695434	0.53821	0.778528	-0.108043	0.88657
B4DXJ9	B4DXJ9	Proteasome (Prosome, macropain) subunit, alpha type, 6, isoform CRA_a OS=Homo sapiens GN=PSMA6 PE=2 SV=1	0.11984	-0.171862	0.182458	0.334206	0.322777	0.557696	0.0434785	0.404893	-0.361415
B4DXW1	B4DXW1	Uncharacterized protein OS=Homo sapiens GN=ACTR3 PE=2 SV=1	0.942627	0.414778	0.245304	0.874561	0.669473	0.703134	0.534236	0.749056	-0.21482
B4DXX7	B4DXX7	Uncharacterized protein OS=Homo sapiens GN=DDX3Y PE=2 SV=1	1.05601		0.583817	-0.451618		0.226591	0.819914	-0.112514	0.932428
B4DXY3	B4DXY3	Uncharacterized protein OS=Homo sapiens GN=HSPA1L PE=2 SV=1	0.476881	0.932431	0.519708	0.631544	0.520305	0.477298	0.643007	0.543049	0.0999577
B4DXY7	B4DXY7	Uncharacterized protein OS=Homo sapiens GN=ALDH9A1 PE=2 SV=1	0.728873	0.73799	0.402628	0.576793	0.434808	-0.239197	0.623164	0.257468	0.365696
B4DY05	B4DY05	Uncharacterized protein OS=Homo sapiens GN=WDR1 PE=2 SV=1	1.18736	0.0957194	-0.262354	1.08354	0.251572	1.08085	0.340242	0.805319	-0.465077
B4DY72	B4DY72	Uncharacterized protein OS=Homo sapiens GN=HSPH1 PE=2 SV=1	0.669408		0.22153	0.244189		0.426214	0.445469	0.335202	0.110267
B4DYA0	B4DYA0	Guanine nucleotide binding protein (G protein), alpha inhibiting activity polypeptide 2, isoform CRA_f OS=Homo sapiens GN=GNAI2 PE=2 SV=1	-0.0619874	-0.268349	0.266992	0.465132	0.831863	0.787837	-0.0211147	0.694944	-0.716058
B4DYA6	B4DYA6	Destrin (Actin depolymerizing factor), isoform CRA_a OS=Homo sapiens GN=DSTN PE=2 SV=1	1.12159		-0.271553	1.69313		0.00162001	0.42502	0.847374	-0.422354
B4DYB0	B4DYB0	Uncharacterized protein OS=Homo sapiens GN=CCT6B PE=2 SV=1	1.14357	0.892355	-0.229008	-0.166904	-0.695434	0.540914	0.602307	-0.107142	0.709448
B4DYD8	B4DYD8	Uncharacterized protein OS=Homo sapiens GN=CCT5 PE=2 SV=1	0.769648	0.43174	0.211286	-0.499809	-0.449598	0.494376	0.470891	-0.151677	0.622568
B4DYH1	B4DYH1	Heat shock 105kDa/110kDa protein 1, isoform CRA_b OS=Homo sapiens GN=HSPH1 PE=2 SV=1	0.669408	0.0683166	0.22153	0.244189	0.772059	0.426214	0.319751	0.480821	-0.161069
B4DYH8	B4DYH8	Uncharacterized protein OS=Homo sapiens GN=GNS PE=2 SV=1	-0.0157573	0.0616033	0.662687	0.739373	1.52715	0.229211	0.236178	0.83191	-0.595732
B4DYP2	B4DYP2	Uncharacterized protein OS=Homo sapiens GN=HADHA PE=2 SV=1	1.11907	1.43419	2.28197	1.07359	0.803217	1.36663	1.61174	1.08115	0.530596
B4DYQ7	B4DYQ7	Uncharacterized protein OS=Homo sapiens GN=ITGAV PE=2 SV=1	0.0934742	0.293833	0.990161	1.68698	0.887802	1.87857	0.459156	1.48445	-1.02529
B4DZI8	B4DZI8	Coatomer protein complex, subunit beta 2 (Beta prime), isoform CRA_b OS=Homo sapiens GN=COPB2 PE=2 SV=1	1.13947	0.350376	0.999069	0.453128	-0.629446	1.43803	0.829637	0.420571	0.409066
B4DZN3	B4DZN3	Uncharacterized protein OS=Homo sapiens GN=PAFAH1B1 PE=2 SV=1	0.507572	0.109959	-0.0873694	0.172266	-0.173632	0.451146	0.17672	0.149926	0.026794
B4DZP5	B4DZP5	Uncharacterized protein OS=Homo sapiens GN=DDB1 PE=2 SV=1	0.329541	0.168824	0.213632	0.377538	0.442907	0.296105	0.237332	0.372184	-0.134851
B4DZW6	B4DZW6	Uncharacterized protein OS=Homo sapiens GN=FAM82B PE=2 SV=1	0.231108	-0.244497	0.260488	0.213062	0.221533	-0.528545	0.0823661	-0.0313166	0.113683
B4E022	B4E022	Uncharacterized protein OS=Homo sapiens GN=TKT PE=2 SV=1	4.48181	4.0298	3.49287	4.46148	4.57675	3.88731	4.00149	4.30851	-0.30702
B4E072	B4E072	Uncharacterized protein OS=Homo sapiens GN=ACAA1 PE=2 SV=1	0.29205	0.649464	0.382535	0.0948685	0.0380107	0.562531	0.44135	0.231804	0.209546
B4E0K9	B4E0K9	Uncharacterized protein OS=Homo sapiens GN=MAN2B1 PE=2 SV=1	-1.03952	4.44727	1.12194	-1.64172	5.65549	0.874754	1.5099	1.62951	-0.119607
B4E1F3	B4E1F3	Uncharacterized protein OS=Homo sapiens GN=SELENBP1 PE=2 SV=1	0.919934	0.384379	0.558428	-0.335011	0.254422	-0.333553	0.620914	-0.138047	0.758961
B4E1H9	B4E1H9	Phosphoglycerate kinase OS=Homo sapiens GN=PGK1 PE=2 SV=1	1.34694	0.489796	0.651961	1.50292	0.932054	1.27297	0.829564	1.23598	-0.406417
B4E1N2	B4E1N2	Uncharacterized protein OS=Homo sapiens GN=IGFBP7 PE=2 SV=1	-0.0327589	-0.0547502	-0.196741	1.11873	1.69646	0.618972	-0.0947502	1.14472	-1.23947
B4E2T8	B4E2T8	Uncharacterized protein OS=Homo sapiens GN=CANX PE=2 SV=1	0.575286		1.41334	0.577498		0.606231	0.994315	0.591864	0.40245
B4E2V5	B4E2V5	Uncharacterized protein OS=Homo sapiens GN=STOM PE=2 SV=1	0.638624	0.621924	0.940599	0.421756	0.56801	0.238253	0.733716	0.40934	0.324376
B4E2W0	B4E2W0	Uncharacterized protein OS=Homo sapiens GN=HADHB PE=2 SV=1	0.689941	2.23845	1.15004	-0.416286	0.0759028	-0.271178	1.35948	-0.203854	1.56333
B4E2X5	B4E2X5	Guanine nucleotide binding protein (G protein), alpha inhibiting activity polypeptide 2, isoform CRA_c OS=Homo sapiens GN=GNAI2 PE=2 SV=1	-0.0619874	-0.268349	0.266992	0.465132	0.831863	0.787837	-0.0211147	0.694944	-0.716058
B4E2Y9	B4E2Y9	Uncharacterized protein OS=Homo sapiens GN=CALR PE=2 SV=1	0.337511	1.05249	1.6084	1.72194	1.19414	1.44778	0.999468	1.45462	-0.455153
B4E335	B4E335	Uncharacterized protein OS=Homo sapiens GN=ACTB PE=2 SV=1	3.10591	3.03164	3.47453	3.60212	4.06293	3.6201	3.20403	3.76172	-0.55769
B4E358	B4E358	Uncharacterized protein OS=Homo sapiens GN=CTTN PE=2 SV=1	0.510609	0.0129176	0.162817	0.121409	0.329989	0.421172	0.228781	0.290857	-0.0620756
B4E390	B4E390	RAB35, member RAS oncogene family, isoform CRA_b OS=Homo sapiens GN=RAB35 PE=2 SV=1	0.502986	0.367739	0.443743	0.0467269	0.254549	-0.15422	0.438156	0.0490184	0.389138
B4E3E8	B4E3E8	Uncharacterized protein OS=Homo sapiens GN=DDX3X PE=2 SV=1	1.05601		0.583817	-0.451618		0.226591	0.819914	-0.112514	0.932428
B4E3K9	B4E3K9	Superoxide dismutase OS=Homo sapiens GN=SOD2 PE=2 SV=1	0.89397	0.894439	1.52372	1.14015	0.619074	1.39737	1.10404	1.0522	0.0518465
B4E3P0	B4E3P0	Uncharacterized protein OS=Homo sapiens GN=ACLY PE=2 SV=1	0.792018	0.56564	0.593608	-0.0541514	-0.39906	0.807552	0.650422	0.118113	0.532308
B4E3S0	B4E3S0	Uncharacterized protein OS=Homo sapiens GN=CORO1C PE=2 SV=1	1.25883	0.335735	0.0164574	0.0920461	0.0906403	0.488888	0.537008	0.223858	0.31315
B4E3U4	B4E3U4	Uncharacterized protein OS=Homo sapiens GN=RBMX PE=2 SV=1	0.101269	0.66359	0.144841	0.191619	-0.0979394	0.262814	0.303233	0.118831	0.184402
B5MCQ5	B5MCQ5	Uncharacterized protein OS=Homo sapiens GN=PDIA6 PE=3 SV=1	0.619476	1.30495	0.943954	1.10573	0.717027	1.46305	0.956127	1.09527	-0.139144
B5MCW2	B5MCW2	Uncharacterized protein OS=Homo sapiens GN=RPL3 PE=3 SV=1	0.941567	1.33251	1.06132	0.504417	1.57261	1.14127	1.1118	1.07277	0.039033
B5MCX3	B5MCX3	Uncharacterized protein OS=Homo sapiens GN=SEPT2 PE=3 SV=1	0.442304	0.807293	0.835564	0.481652	0.472184	1.59831	0.695054	0.850716	-0.155662
B5MD38	B5MD38	Uncharacterized protein OS=Homo sapiens GN=HADHB PE=3 SV=1	0.689941	2.23845	1.15004	-0.416286	0.0759028	-0.271178	1.35948	-0.203854	1.56333
B5MDC1	B5MDC1	Uncharacterized protein OS=Homo sapiens GN=TPP1 PE=4 SV=3	-0.0984225	0.435823	0.595433	0.305929	0.687992	0.556554	0.310945	0.516825	-0.205881
B5MDX4	B5MDX4	Uncharacterized protein OS=Homo sapiens PE=4 SV=1	-0.285716	-0.171074	0.0139139	0.665183	1.25551	0.802423	-0.147625	0.907705	-1.05533
B5ME26	B5ME26	Uncharacterized protein OS=Homo sapiens GN=AKR1C2 PE=4 SV=1	1.56102	0.860173	1.09505	0.0771316	0.12804	-0.443312	1.17208	-0.0793801	1.25146
B5MEG9	B5MEG9	Uncharacterized protein OS=Homo sapiens GN=MAP4 PE=4 SV=2	0.627894	0.101309	0.167586	0.305955	1.14458	-0.0674075	0.29893	0.461044	-0.162114
B7WNR0	B7WNR0	Uncharacterized protein OS=Homo sapiens GN=ALB PE=4 SV=1	1.19957		-0.153198	-0.3074		-0.053858	0.523184	-0.180629	0.703814
B7Z1C9	B7Z1C9	Chaperonin containing TCP1, subunit 7 (Eta), isoform CRA_a OS=Homo sapiens GN=CCT7 PE=2 SV=1	0.527621		-1.39227	-0.725355		-2.12072	-0.432326	-1.42304	0.990713
B7Z1M1	B7Z1M1	Uncharacterized protein OS=Homo sapiens GN=RCN1 PE=2 SV=1	0.545072	0.167876	0.504257	0.814108	-0.195211	0.0876501	0.405735	0.235516	0.17022
B7Z1N6	B7Z1N6	Fructose-bisphosphate aldolase OS=Homo sapiens GN=ALDOC PE=2 SV=1	0.722452	-0.102577	0.490044	0.238085	-0.242274	1.75747	0.369973	0.584427	-0.214454
B7Z1R5	B7Z1R5	Uncharacterized protein OS=Homo sapiens GN=ATP6V1A PE=2 SV=1	0.671801	0.314918	0.616452	0.449354	0.452705	1.20515	0.534391	0.702404	-0.168013
B7Z1U8	B7Z1U8	Uncharacterized protein OS=Homo sapiens GN=FKBP9 PE=2 SV=1	0.502178		0.37876	0.244603		0.366232	0.440469	0.305417	0.135052
B7Z230	B7Z230	Uncharacterized protein OS=Homo sapiens GN=FKBP9 PE=2 SV=1	0.341639	0.629885	0.25507	0.360558	-0.0503172	0.157267	0.408865	0.155836	0.253029
B7Z254	B7Z254	Uncharacterized protein OS=Homo sapiens GN=PDIA6 PE=2 SV=1	0.619476	1.30495	0.943954	1.10573	0.717027	1.46305	0.956127	1.09527	-0.139144
B7Z2E6	B7Z2E6	Uncharacterized protein OS=Homo sapiens GN=YWHAZ PE=2 SV=1	1.78462	1.09547	1.07607	1.6688	0.459928	1.77915	1.31872	1.30263	0.0160942
B7Z2F4	B7Z2F4	T-complex protein 1 subunit delta OS=Homo sapiens GN=CCT4 PE=2 SV=1	0.626492	0.277315	0.12849	0.164993	-1.36903	0.857079	0.344099	-0.115651	0.45975
B7Z2S5	B7Z2S5	Uncharacterized protein OS=Homo sapiens GN=TXNRD1 PE=2 SV=1	1.34236	1.00513	1.21011	1.80087	1.42084	1.41597	1.18587	1.54589	-0.360026
B7Z2V6	B7Z2V6	Uncharacterized protein OS=Homo sapiens GN=ATP6V1A PE=2 SV=1	0.654515	0.314918	0.666678	0.74949	0.0779192	1.21442	0.54537	0.680611	-0.135241
B7Z2X9	B7Z2X9	Enolase OS=Homo sapiens GN=ENO2 PE=2 SV=1	1.6877	1.1418	0.867375	1.8412	1.10318	1.68691	1.23229	1.54376	-0.311471
B7Z373	B7Z373	Gelsolin (Amyloidosis, Finnish type), isoform CRA_b OS=Homo sapiens GN=GSN PE=2 SV=1	0.967494	0.465372	0.134875	0.667324	0.084136	0.582161	0.52258	0.44454	0.07804
B7Z3T7	B7Z3T7	Uncharacterized protein OS=Homo sapiens GN=PDHA1 PE=2 SV=1		0.5331	0.586949		0.0305415	0.178571	0.560024	0.104556	0.455468
B7Z3U6	B7Z3U6	ATPase, Na+/K+ transporting, alpha 1 polypeptide, isoform CRA_a OS=Homo sapiens GN=ATP1A1 PE=2 SV=1		0.707023	0.766067		-0.292519	0.212629	0.736545	-0.0399451	0.77649
B7Z3X4	B7Z3X4	Uncharacterized protein OS=Homo sapiens GN=GNPDA1 PE=2 SV=1	1.1731		-0.0162294	-0.376817		-0.44122	0.578434	-0.409019	0.987452
B7Z3X5	B7Z3X5	Uncharacterized protein OS=Homo sapiens GN=PDHA1 PE=2 SV=1		0.5331	0.586949		0.0305415	0.178571	0.560024	0.104556	0.455468
B7Z3Y2	B7Z3Y2	Uncharacterized protein OS=Homo sapiens GN=PCYOX1 PE=2 SV=1	0.509823	1.34724	1.25641	-0.0978558	1.01938	0.552036	1.03782	0.491185	0.546636
B7Z403	B7Z403	Uncharacterized protein OS=Homo sapiens GN=GLOD4 PE=2 SV=1	0.470508	-0.496592	-0.208426	0.353959	0.355525	0.0696011	-0.0781702	0.259695	-0.337865
B7Z463	B7Z463	Uncharacterized protein OS=Homo sapiens GN=NPEPPS PE=2 SV=1	0.578716	0.726568	0.423572	1.40155	0.398363	1.88709	0.576286	1.229	-0.652715
B7Z468	B7Z468	Uncharacterized protein OS=Homo sapiens GN=CAST PE=2 SV=1	0.75673	1.49971	0.391837	0.433647	-0.0111775	0.628402	0.88276	0.350291	0.53247
B7Z4C8	B7Z4C8	Uncharacterized protein OS=Homo sapiens GN=RPL31 PE=2 SV=1		1.02985	-0.337093		1.71386	-0.212179	0.346378	0.750839	-0.404461
B7Z4E3	B7Z4E3	Uncharacterized protein OS=Homo sapiens GN=RPL31 PE=2 SV=1		1.02985	-0.337093		1.71386	-0.212179	0.346378	0.750839	-0.404461
B7Z4K2	B7Z4K2	Ribosomal protein L31, isoform CRA_c OS=Homo sapiens GN=RPL31 PE=2 SV=1		1.02985	-0.337093		1.71386	-0.212179	0.346378	0.750839	-0.404461
B7Z4L4	B7Z4L4	Uncharacterized protein OS=Homo sapiens GN=RPN1 PE=2 SV=1	0.55822	0.326102	0.920258	-0.514858	-0.672701	0.00738462	0.601527	-0.393392	0.994918
B7Z4T9	B7Z4T9	Chaperonin containing TCP1, subunit 7 (Eta), isoform CRA_c OS=Homo sapiens GN=CCT7 PE=2 SV=1	0.645182	0.549911	-0.287669	-0.327182	-0.0808977	-1.0918	0.302475	-0.499961	0.802435
B7Z4V2	B7Z4V2	Uncharacterized protein OS=Homo sapiens GN=HSPA9 PE=2 SV=1	1.27793	1.52075	1.65516	1.41891	1.52229	0.984233	1.48462	1.30848	0.176141
B7Z4Y6	B7Z4Y6	Alkaline phosphatase OS=Homo sapiens GN=ALPL PE=2 SV=1		0.504393	0.776396		1.10545	1.11681	0.640394	1.11113	-0.470735
B7Z4Z7	B7Z4Z7	Uncharacterized protein OS=Homo sapiens GN=CCT7 PE=2 SV=1	0.527621		-1.39227	-0.725355		-2.12072	-0.432326	-1.42304	0.990713
B7Z574	B7Z574	Uncharacterized protein OS=Homo sapiens GN=CAST PE=2 SV=1	0.75673	1.49971	0.391837	0.433647	-0.0111775	0.628402	0.88276	0.350291	0.53247
B7Z582	B7Z582	Uncharacterized protein OS=Homo sapiens GN=ANXA6 PE=2 SV=1	2.6827	1.82092	1.46615	2.51237	2.01089	2.0642	1.98992	2.19582	-0.205898
B7Z5D8	B7Z5D8	Triosephosphate isomerase OS=Homo sapiens GN=TPI1 PE=2 SV=1	1.81043	0.646957	0.885837	1.43716	1.21414	0.762375	1.11441	1.13789	-0.0234822
B7Z5E3	B7Z5E3	L-lactate dehydrogenase OS=Homo sapiens GN=LDHA PE=2 SV=1	1.66411	0.745219	0.499768	1.37108	1.08992	0.665126	0.9697	1.04204	-0.072342
B7Z5T4	B7Z5T4	Four and a half LIM domains 1, isoform CRA_c OS=Homo sapiens GN=FHL1 PE=2 SV=1	0.839156	0.710172	0.879244	-0.276463	0.215794	0.661814	0.809524	0.200382	0.609142
B7Z5V0	B7Z5V0	Uncharacterized protein OS=Homo sapiens GN=FHL1 PE=2 SV=1	0.921055	0.710172	0.879244	-0.276463	0.215794	0.661814	0.836824	0.200382	0.636442
B7Z5W8	B7Z5W8	Uncharacterized protein OS=Homo sapiens GN=DLST PE=2 SV=1	0.239277	0.453986	0.734559	0.0757999	0.0712152	-0.00112667	0.475941	0.0486295	0.427311
B7Z6B8	B7Z6B8	Uncharacterized protein OS=Homo sapiens GN=DECR1 PE=2 SV=1	0.774438	0.915126	1.63341	0.468346	0.586396	0.628242	1.10766	0.560994	0.546663
B7Z6H3	B7Z6H3	Uncharacterized protein OS=Homo sapiens GN=FKBP9 PE=2 SV=1	0.440333	0.629885	0.25507	0.147691	-0.0503172	0.280833	0.441763	0.126069	0.315694
B7Z6M1	B7Z6M1	Uncharacterized protein OS=Homo sapiens GN=PLS3 PE=2 SV=1	0.738187	0.1657	-0.243363	0.241664	-0.0229525	0.53111	0.220175	0.24994	-0.0297656
B7Z6S8	B7Z6S8	Uncharacterized protein OS=Homo sapiens GN=RPL14 PE=2 SV=1	0.195192	1.12438	0.855545	-0.199879	0.335171	0.238064	0.72504	0.124452	0.600588
B7Z6U3	B7Z6U3	Uncharacterized protein OS=Homo sapiens GN=ACP2 PE=2 SV=1	-0.062223	0.513266	0.871888	0.675061	0.491986	0.98546	0.440977	0.717502	-0.276525
B7Z6U8	B7Z6U8	Uncharacterized protein OS=Homo sapiens GN=FHL1 PE=2 SV=1	0.839156	0.710172	0.879244	-0.276463	0.215794	0.661814	0.809524	0.200382	0.609142
B7Z6Z4	B7Z6Z4	Uncharacterized protein OS=Homo sapiens GN=MYL6 PE=2 SV=1	0.259178	0.0686708	0.235111	0.927415	1.4445	0.448775	0.187653	0.940229	-0.752576
B7Z712	B7Z712	Uncharacterized protein OS=Homo sapiens GN=HSPD1 PE=2 SV=1	1.25976	1.30036	2.07268	1.11493	0.495386	0.515204	1.54427	0.708506	0.83576
B7Z793	B7Z793	Uncharacterized protein OS=Homo sapiens GN=FHL1 PE=2 SV=1	0.839156	0.710172	0.879244	-0.276463	0.215794	0.661814	0.809524	0.200382	0.609142
B7Z7A9	B7Z7A9	Phosphoglycerate kinase OS=Homo sapiens GN=PGK1 PE=2 SV=1	1.34694	0.488897	0.651961	1.50292	0.767209	1.56509	0.829265	1.27841	-0.449141
B7Z7E1	B7Z7E1	Uncharacterized protein OS=Homo sapiens GN=CNN1 PE=2 SV=1	0.059649	-0.284191	-0.358117	1.18979	1.05115	0.915923	-0.19422	1.05229	-1.24651
B7Z7L3	B7Z7L3	Uncharacterized protein OS=Homo sapiens GN=CYB5R3 PE=2 SV=1	-0.0463395	1.69887	0.464528	0.00724113	1.56183	-0.299447	0.705684	0.423209	0.282476
B7Z7Q6	B7Z7Q6	Uncharacterized protein OS=Homo sapiens GN=PRCP PE=2 SV=1	0.097674	0.357428	0.82901	0.735371	1.24183	0.938019	0.428037	0.971742	-0.543704
B7Z8M7	B7Z8M7	Uncharacterized protein OS=Homo sapiens GN=RAB1A PE=2 SV=1	0.726885	0.834736	0.808901	0.355097	0.178106	0.88465	0.790174	0.472618	0.317556
B7Z904	B7Z904	Thioredoxin reductase 1 OS=Homo sapiens GN=TXNRD1 PE=2 SV=1	1.34236	1.00513	1.21011	1.80087	1.42084	1.41597	1.18587	1.54589	-0.360026
B7Z909	B7Z909	Uncharacterized protein OS=Homo sapiens GN=HYOU1 PE=2 SV=1		1.0019	0.726375		0.0796568	2.15897	0.864139	1.11931	-0.255175
B7Z9F1	B7Z9F1	Serine hydroxymethyltransferase OS=Homo sapiens GN=SHMT2 PE=2 SV=1	0.446924	0.0752186	-0.182196	0.669704	1.38433	-0.416496	0.113316	0.545846	-0.432531
B7Z9I1	B7Z9I1	Uncharacterized protein OS=Homo sapiens GN=ACADM PE=2 SV=1	0.126083	0.585822	0.357417	0.65518	1.44338	0.362532	0.356441	0.820363	-0.463922
B7Z9J8	B7Z9J8	Uncharacterized protein OS=Homo sapiens GN=IDH3A PE=2 SV=1		1.00191	0.730365		0.118383	0.575886	0.866138	0.347135	0.519004
B7Z9L0	B7Z9L0	T-complex protein 1 subunit delta OS=Homo sapiens GN=CCT4 PE=2 SV=1	0.626492	0.370098	0.230274	0.164993	-1.46834	0.65416	0.408955	-0.216395	0.62535
B7Z9P8	B7Z9P8	Uncharacterized protein OS=Homo sapiens GN=PCYOX1 PE=2 SV=1	0.509823	1.34724	1.25641	-0.0978558	1.01938	0.552036	1.03782	0.491185	0.546636
B7ZAM9	B7ZAM9	Uncharacterized protein OS=Homo sapiens GN=EIF3K PE=2 SV=1	0.809321	-0.463183	-0.388895	-0.0283974	-0.644508	-0.382803	-0.0142522	-0.351903	0.337651
B7ZAR1	B7ZAR1	Uncharacterized protein OS=Homo sapiens GN=CCT5 PE=2 SV=1	0.769648	0.43174	0.211286	-0.499809	-0.449598	0.494376	0.470891	-0.151677	0.622568
B7ZAT2	B7ZAT2	Chaperonin containing TCP1, subunit 2 (Beta), isoform CRA_c OS=Homo sapiens GN=CCT2 PE=2 SV=1	0.884678	0.608049	1.23402	-0.117687	-0.493318	0.926736	0.908915	0.105244	0.803671
B7ZBG9	B7ZBG9	Eukaryotic translation initiation factor 6 OS=Homo sapiens GN=EIF6 PE=3 SV=1	0.363673	0.556551	0.268396	0.142239	0.415984	0.25071	0.396207	0.269644	0.126562
B7ZMM5	B7ZMM5	PALLD protein OS=Homo sapiens GN=PALLD PE=2 SV=1	0.381303	0.0654256	-0.0758089	0.316908	0.826111	0.388296	0.12364	0.510439	-0.386799
B8ZZ38	B8ZZ38	Uncharacterized protein OS=Homo sapiens GN=LRPPRC PE=4 SV=1	0.894947	0.889238	1.48177	0.403738	0.411686	1.04037	1.08865	0.618599	0.470052
B8ZZ51	B8ZZ51	Uncharacterized protein OS=Homo sapiens GN=MDH1 PE=4 SV=1	1.37039	0.354529	0.641043	0.549146	0.186579	0.670814	0.788655	0.468847	0.319808
B8ZZ54	B8ZZ54	Heat shock 10kDa protein 1 (Chaperonin 10), isoform CRA_h OS=Homo sapiens GN=HSPE1 PE=3 SV=1	-0.0733576	0.643917	0.894159	0.401022	1.61035	-0.36	0.48824	0.550456	-0.0622164
B8ZZA1	B8ZZA1	Uncharacterized protein OS=Homo sapiens GN=PTMA PE=4 SV=1	1.37736	0.472375	0.875779	0.390451	0.410049	0.45898	0.908506	0.419827	0.488679
B8ZZC9	B8ZZC9	Uncharacterized protein OS=Homo sapiens GN=CCT7 PE=3 SV=1	0.527621	0.549911	-0.287669	-0.725355	-0.0808977	-1.0918	0.263288	-0.632685	0.895973
B8ZZI3	B8ZZI3	Uncharacterized protein OS=Homo sapiens GN=PTMA PE=4 SV=1	1.37736	0.472375	0.875779	0.390451	0.410049	0.45898	0.908506	0.419827	0.488679
B8ZZJ2	B8ZZJ2	Uncharacterized protein OS=Homo sapiens GN=ACTG2 PE=3 SV=1	0.331882	0.233034	1.0641	0.469072	1.28403	0.305915	0.543004	0.686339	-0.143335
B8ZZK4	B8ZZK4	Uncharacterized protein OS=Homo sapiens GN=RPL31 PE=4 SV=1		1.02985	-0.337093		1.71386	-0.212179	0.346378	0.750839	-0.404461
B8ZZL8	B8ZZL8	Heat shock 10kDa protein 1 (Chaperonin 10), isoform CRA_b OS=Homo sapiens GN=HSPE1 PE=3 SV=1	0.396317	0.644079	1.67195	0.438041	0.906949	-0.377388	0.904115	0.322534	0.581581
B8ZZQ6	B8ZZQ6	Uncharacterized protein OS=Homo sapiens GN=PTMA PE=4 SV=1	1.37736	0.472375	0.875779	0.390451	0.410049	0.45898	0.908506	0.419827	0.488679
B8ZZQ7	B8ZZQ7	Uncharacterized protein OS=Homo sapiens GN=IMMT PE=4 SV=2	0.108684	0.821467	0.663856	-0.307073	-0.063926	-0.224852	0.531335	-0.198617	0.729952
B8ZZW7	B8ZZW7	Uncharacterized protein OS=Homo sapiens GN=PTMA PE=4 SV=1	1.37736	0.472375	0.875779	0.390451	0.410049	0.45898	0.908506	0.419827	0.488679
B9A041	B9A041	Uncharacterized protein OS=Homo sapiens GN=MDH1 PE=4 SV=1	1.59299	0.694609	0.588993	1.16191	0.82504	0.465282	0.958864	0.81741	0.141454
B9A067	B9A067	Uncharacterized protein OS=Homo sapiens GN=IMMT PE=4 SV=2	0.108684	0.821467	0.663856	-0.307073	-0.063926	-0.224852	0.531335	-0.198617	0.729952
B9ZVR1	B9ZVR1	Microtubule-associated protein OS=Homo sapiens GN=MAP4 PE=4 SV=3	1.19778	0.872735	0.247192	0.848256	0.790497	0.544189	0.772569	0.727647	0.0449219
O95817	BAG3	BAG family molecular chaperone regulator 3 OS=Homo sapiens GN=BAG3 PE=1 SV=3	0.425303	0.434977	0.400474	0.210496	0.706195	0.576787	0.420251	0.497826	-0.0775747
P35613	BASI	Basigin OS=Homo sapiens GN=BSG PE=1 SV=2	0.255504	0.686451	0.609852	0.55848	0.846519	0.422786	0.517269	0.609262	-0.091993
P80723	BASP1	Brain acid soluble protein 1 OS=Homo sapiens GN=BASP1 PE=1 SV=2	0.27652	0.295661	0.459397	0.543718	0.617033	0.169021	0.343859	0.443257	-0.0993981
Q9BUT1	BDH2	3-hydroxybutyrate dehydrogenase type 2 OS=Homo sapiens GN=BDH2 PE=1 SV=2	0.736108		-0.412491	0.272879		0.330734	0.161809	0.301806	-0.139997
P16278	BGAL	Beta-galactosidase OS=Homo sapiens GN=GLB1 PE=1 SV=2	0.540592	0.556452	1.12247	1.17974	0.724451	1.36845	0.739838	1.09088	-0.351043
Q10588	BST1	ADP-ribosyl cyclase 2 OS=Homo sapiens GN=BST1 PE=1 SV=2	0.819204	0.524974	0.944709	1.36105	0.113069	1.29257	0.762962	0.922227	-0.159265
C8KIL8	C8KIL8	Glutathion reductase delta8 alternative splicing variant OS=Homo sapiens GN=GSR PE=2 SV=1	0.911296	0.172699	0.166867	0.479791	0.884743	0.592203	0.416954	0.652246	-0.235292
C8KIL9	C8KIL9	Glutathion reductase delta9 alternative splicing varian OS=Homo sapiens GN=GSR PE=2 SV=1	0.778363	0.387721	0.246518	0.461421	0.805092	0.702079	0.470868	0.656197	-0.18533
C8KIM0	C8KIM0	Glutathion reductase delta8+9 alternative splicing variant OS=Homo sapiens GN=GSR PE=2 SV=1	0.911296	0.172699	0.166867	0.479791	0.884743	0.592203	0.416954	0.652246	-0.235292
C9IY94	C9IY94	Uncharacterized protein OS=Homo sapiens GN=SEPT2 PE=4 SV=1	0.276305	0.363523	-0.00573581	-0.0942521	0.078736	0.811934	0.211364	0.265473	-0.0541084
C9IYI3	C9IYI3	Uncharacterized protein OS=Homo sapiens GN=HSPA1B PE=3 SV=1	0.286685	0.61344	0.450062	0.17188	0.701587	0.562195	0.450062	0.478554	-0.0284916
C9IZ41	C9IZ41	Uncharacterized protein OS=Homo sapiens GN=ZYX PE=4 SV=1	1.30842	1.3376	1.20911	1.54911	2.17248	0.720568	1.28504	1.48072	-0.195676
C9IZA2	C9IZA2	Uncharacterized protein OS=Homo sapiens GN=TPM1 PE=2 SV=2	0.186001	0.0578187	-0.200782	0.670497	1.05624	0.493718	0.0143459	0.740151	-0.725805
C9IZA5	C9IZA5	Uncharacterized protein OS=Homo sapiens GN=VCP PE=4 SV=1	1.79237	0.80089	0.302536	2.78168	0.527347	2.27531	0.965266	1.86145	-0.896181
C9IZU3	C9IZU3	Uncharacterized protein OS=Homo sapiens GN=SEPT2 PE=4 SV=1	0.276305	0.363523	-0.00573581	-0.0942521	0.078736	0.811934	0.211364	0.265473	-0.0541084
C9IZZ0	C9IZZ0	Uncharacterized protein OS=Homo sapiens GN=RAB7A PE=4 SV=1		0.527766	0.97515		0.473748	-0.178323	0.751458	0.147712	0.603746
C9J0D1	C9J0D1	Histone H2A OS=Homo sapiens GN=H2AFV PE=3 SV=1	-0.042506	0.130605	0.473256	0.448716	1.40811	-0.0977938	0.187118	0.586343	-0.399225
C9J131	C9J131	Uncharacterized protein OS=Homo sapiens GN=FAP PE=4 SV=1	0.153378	0.712485	0.316514	0.631892	0.0526878	-0.0619981	0.394126	0.207527	0.186598
C9J1T2	C9J1T2	Uncharacterized protein OS=Homo sapiens GN=RHOA PE=4 SV=1	1.51428	0.431156	0.782048	1.12256	4.08534	0.269577	0.909161	1.82582	-0.916663
C9J2C0	C9J2C0	Uncharacterized protein OS=Homo sapiens GN=TUBA8 PE=3 SV=1	0.964444		0.270076	0.501414		1.1294	0.61726	0.815407	-0.198147
C9J2Q4	C9J2Q4	Uncharacterized protein OS=Homo sapiens GN=SEPT2 PE=4 SV=1	0.276305	0.363523	-0.00573581	-0.0942521	0.078736	0.811934	0.211364	0.265473	-0.0541084
C9J3B0	C9J3B0	Uncharacterized protein OS=Homo sapiens GN=TOR1AIP1 PE=4 SV=1		0.467525	-0.28802		0.409154	-0.164652	0.0897525	0.122251	-0.0324985
C9J3N8	C9J3N8	Uncharacterized protein OS=Homo sapiens GN=HSPB1 PE=4 SV=1	0.379392	0.455927	0.704605	0.578787	0.604599	1.08562	0.513308	0.756334	-0.243026
C9J406	C9J406	Uncharacterized protein OS=Homo sapiens GN=IMMT PE=4 SV=1	0.108684	0.821467	0.663856	-0.307073	-0.063926	-0.224852	0.531335	-0.198617	0.729952
C9J4G9	C9J4G9	Uncharacterized protein OS=Homo sapiens GN=GLB1 PE=4 SV=1	1.08541	0.556452	1.12247	1.17637	0.578756	1.68498	0.921443	1.1467	-0.225259
C9J4S4	C9J4S4	Uncharacterized protein OS=Homo sapiens GN=RAB7A PE=4 SV=1	0.259044	0.527766	0.841313	0.280829	0.473748	-0.11112	0.542707	0.214485	0.328222
C9J4V0	C9J4V0	Uncharacterized protein OS=Homo sapiens GN=RAB7A PE=4 SV=1	0.259044	0.527766	0.85556	0.280829	0.473748	0.429423	0.547457	0.394667	0.15279
C9J592	C9J592	Uncharacterized protein OS=Homo sapiens GN=RAB7A PE=3 SV=1	2.56383	0.527766	0.827065	0.844276	0.473748	-0.78607	1.30622	0.177318	1.1289
C9J5G4	C9J5G4	Uncharacterized protein OS=Homo sapiens GN=FSTL1 PE=4 SV=1	0.0110051	0.294195	0.369991	0.494774	1.11253	-0.066476	0.225064	0.513608	-0.288544
C9J5S7	C9J5S7	Peptidyl-prolyl cis-trans isomerase OS=Homo sapiens GN=PPIA PE=3 SV=1	0.696984	0.0251828	0.0736932	1.81212	1.02814	0.444875	0.265287	1.09505	-0.82976
C9J5W6	C9J5W6	Uncharacterized protein OS=Homo sapiens GN=TAGLN3 PE=4 SV=1	1.26529	0.0710207	-0.366333	0.78163	0.509931	0.0367538	0.323326	0.442772	-0.119446
C9J634	C9J634	Uncharacterized protein OS=Homo sapiens GN=PDHB PE=4 SV=1	0.607567	0.608724	0.54063	0.366822	0.50006	0.114649	0.58564	0.327177	0.258463
C9J7H8	C9J7H8	Uncharacterized protein OS=Homo sapiens GN=LDHB PE=3 SV=1	1.1818	0.482541	0.0527028	0.436982	-0.434002	0.478673	0.572349	0.160551	0.411798
C9J7P1	C9J7P1	Uncharacterized protein OS=Homo sapiens GN=DBNL PE=4 SV=2	0.918023	0.210512	0.252594	0.493482	1.1898	-0.0102908	0.460376	0.557662	-0.097286
C9J813	C9J813	Uncharacterized protein OS=Homo sapiens GN=CALD1 PE=4 SV=1	0.495039	0.23604	0.387816	0.826133	1.34388	0.599609	0.372965	0.923208	-0.550243
C9J8F3	C9J8F3	Uncharacterized protein OS=Homo sapiens GN=ALDOC PE=4 SV=1	0.0247669	-0.102577	0.490044	-0.776097	-0.242274	1.75747	0.137411	0.246366	-0.108955
C9J8S3	C9J8S3	Uncharacterized protein OS=Homo sapiens GN=RAB7A PE=3 SV=1	0.259044	0.527766	0.85556	0.280829	0.473748	0.429423	0.547457	0.394667	0.15279
C9J938	C9J938	Uncharacterized protein OS=Homo sapiens GN=SEPT2 PE=4 SV=1	0.276305	0.363523	-0.00573581	-0.0942521	0.078736	0.811934	0.211364	0.265473	-0.0541084
C9J9B2	C9J9B2	Uncharacterized protein OS=Homo sapiens GN=RBMS3 PE=4 SV=1	0.189743		-0.0804288	-0.0860239		-0.1891	0.0546573	-0.137562	0.192219
C9J9K3	C9J9K3	Uncharacterized protein OS=Homo sapiens GN=RPSA PE=3 SV=1	0.670729		0.0223298	0.480687		0.234454	0.346529	0.35757	-0.0110411
C9J9W2	C9J9W2	Uncharacterized protein OS=Homo sapiens GN=LASP1 PE=4 SV=1	0.449364	0.392371	0.182462	0.443613	1.11611	0.632466	0.341399	0.730731	-0.389332
C9JA17	C9JA17	Uncharacterized protein OS=Homo sapiens GN=ATP6V1A PE=4 SV=1	1.17452	0.975274	0.742452	2.86818	0.172178	1.30028	0.964083	1.44688	-0.482795
C9JA33	C9JA33	Uncharacterized protein OS=Homo sapiens GN=PALM2 PE=4 SV=1	-0.134595	-0.0903016	0.2943	-0.122771	0.276619	-0.0719217	0.0231347	0.0273087	-0.00417406
C9JAB2	C9JAB2	Uncharacterized protein OS=Homo sapiens GN=SRSF7 PE=4 SV=1	1.53217		1.30038	1.76481		1.50099	1.41628	1.6329	-0.216622
C9JB25	C9JB25	Uncharacterized protein OS=Homo sapiens GN=SEPT2 PE=4 SV=1	0.276305	0.363523	-0.00573581	-0.0942521	0.078736	0.811934	0.211364	0.265473	-0.0541084
C9JB48	C9JB48	Uncharacterized protein OS=Homo sapiens GN=NAGK PE=4 SV=2	1.27543	0.872093	0.856083	1.38026	1.25374	1.49049	1.0012	1.37483	-0.373628
C9JC79	C9JC79	Uncharacterized protein OS=Homo sapiens GN=SCP2 PE=3 SV=2	2.05178	-0.764574	-0.794709	1.95955	-1.0894	-0.484389	0.164165	0.128587	0.0355781
C9JCA9	C9JCA9	Uncharacterized protein OS=Homo sapiens GN=LRPPRC PE=4 SV=1	0.894947	0.889238	1.48177	0.403738	0.411686	1.04037	1.08865	0.618599	0.470052
C9JCN0	C9JCN0	Uncharacterized protein OS=Homo sapiens GN=MYOF PE=4 SV=2	0.145967	0.901734	0.692089	-0.0888792	-0.0153982	-0.26546	0.57993	-0.123246	0.703176
C9JCP0	C9JCP0	Uncharacterized protein OS=Homo sapiens GN=P4HA2 PE=4 SV=1	0.250717	0.259514	0.567814	0.251143	0.844989	0.129165	0.359348	0.408432	-0.0490839
C9JCQ4	C9JCQ4	Uncharacterized protein OS=Homo sapiens GN=HSPD1 PE=3 SV=1	1.61172	1.30036	2.07268	1.43191	0.495386	0.515204	1.66159	0.814165	0.847422
C9JD14	C9JD14	Uncharacterized protein OS=Homo sapiens GN=GNB4 PE=4 SV=1	0.0882299	1.15017	-0.0156875	0.338854	0.753392	0.31942	0.407572	0.470555	-0.0629834
C9JDE9	C9JDE9	Uncharacterized protein OS=Homo sapiens GN=ACAA1 PE=3 SV=1	0.0947369	0.686311	0.434536	0.173456	0.0380107	0.820663	0.405195	0.344043	0.0611512
C9JE22	C9JE22	Histone H2A OS=Homo sapiens GN=H2AFJ PE=3 SV=1	-0.443318	0.531417	0.555859	-0.217037	3.29664	-0.0829373	0.214653	0.998889	-0.784236
C9JEK3	C9JEK3	Uncharacterized protein OS=Homo sapiens GN=CALD1 PE=4 SV=1	0.452642	0.38678	0.206729	0.512501	-0.398491	0.734726	0.348717	0.282912	0.0658047
C9JEV6	C9JEV6	Uncharacterized protein OS=Homo sapiens GN=NAGK PE=4 SV=3	2.04447	0.872093	0.868207	1.76592	1.25374	1.47837	1.26159	1.49934	-0.237756
C9JF79	C9JF79	Malate dehydrogenase OS=Homo sapiens GN=MDH1 PE=4 SV=1	1.59299	0.646769	0.477932	0.928832	0.845354	0.271675	0.905897	0.681954	0.223944
C9JFC3	C9JFC3	Uncharacterized protein OS=Homo sapiens GN=MAP4 PE=4 SV=2	1.11379	0.981339	0.442699	0.819385	0.227867	1.15635	0.845944	0.734535	0.111409
C9JFL5	C9JFL5	Uncharacterized protein OS=Homo sapiens GN=ACTG2 PE=3 SV=1	0.297599	0.119146	0.667258	0.631262	1.25225	0.374482	0.361334	0.752665	-0.391331
C9JFR7	C9JFR7	Uncharacterized protein OS=Homo sapiens GN=CYCS PE=3 SV=1	0.650112	0.712152	0.956106	0.717269	0.380388	-0.136347	0.77279	0.320437	0.452353
C9JFV5	C9JFV5	Uncharacterized protein OS=Homo sapiens GN=ILF3 PE=4 SV=1	0.375108	0.632815	0.613839	0.0115126	0.354244	0.321391	0.540588	0.229049	0.311538
C9JGC2	C9JGC2	Uncharacterized protein OS=Homo sapiens GN=CPSF6 PE=4 SV=1	0.310132	0.181008	0.646164	0.528647	1.48674	0.800316	0.379101	0.938567	-0.559466
C9JH19	C9JH19	Uncharacterized protein OS=Homo sapiens GN=CTSD PE=3 SV=1	0.377181	0.587829	1.15425	1.13139	1.29681	1.26952	0.706418	1.23257	-0.526155
C9JIG4	C9JIG4	Uncharacterized protein OS=Homo sapiens GN=P4HA2 PE=4 SV=1	0.283076	-0.0979904	0.397263	0.171338	0.672861	-0.167832	0.194116	0.225455	-0.0313395
C9JIJ9	C9JIJ9	Uncharacterized protein OS=Homo sapiens GN=RBMS3 PE=4 SV=1	0.189743		-0.0804288	-0.0860239		-0.1891	0.0546573	-0.137562	0.192219
C9JIS1	C9JIS1	Uncharacterized protein OS=Homo sapiens GN=GNB2 PE=4 SV=1	-0.632111	1.75765	1.35529	-0.166021	1.80109	0.715912	0.826941	0.783661	0.0432806
C9JIZ6	C9JIZ6	Uncharacterized protein OS=Homo sapiens GN=PSAP PE=4 SV=1	1.81606	3.25298	3.38768	2.37394	2.89005	2.99837	2.81891	2.75412	0.064787
C9JJI8	C9JJI8	Uncharacterized protein OS=Homo sapiens GN=PAFAH1B1 PE=4 SV=1	0.856388	0.207443	-0.0334961	0.0951749	-0.728922	-0.194375	0.343445	-0.276041	0.619486
C9JJJ0	C9JJJ0	Uncharacterized protein OS=Homo sapiens GN=SYNPO2 PE=4 SV=1	-0.0677387	0.157308	0.0111104	0.73791	0.631457	0.228067	0.0335598	0.532478	-0.498918
C9JKR2	C9JKR2	Albumin, isoform CRA_k OS=Homo sapiens GN=ALB PE=4 SV=1	1.19957		-0.153198	-0.3074		-0.053858	0.523184	-0.180629	0.703814
C9JKZ2	C9JKZ2	Uncharacterized protein OS=Homo sapiens GN=NUCB1 PE=4 SV=1	-0.035641	-0.0487665	0.0999968	0.186323	0.349576	-0.0682197	0.00519644	0.155893	-0.150697
C9JL12	C9JL12	Uncharacterized protein OS=Homo sapiens GN=P4HA1 PE=4 SV=1	0.610769	0.902851	0.653281	0.520832	0.599647	0.565765	0.722301	0.562081	0.160219
C9JL19	C9JL19	Uncharacterized protein OS=Homo sapiens GN=HSPD1 PE=3 SV=1	1.96369	0.871705	1.61309	1.74889	0.380601	0.744304	1.48283	0.95793	0.524898
C9JL25	C9JL25	Uncharacterized protein OS=Homo sapiens GN=HSPD1 PE=3 SV=1	1.25976	1.30036	2.07268	1.11493	0.495386	0.515204	1.54427	0.708506	0.83576
C9JLI9	C9JLI9	Uncharacterized protein OS=Homo sapiens GN=COL12A1 PE=4 SV=1	-0.0356154	-0.659373	0.105667	0.247791	-0.522622	0.760191	-0.19644	0.161787	-0.358227
C9JM50	C9JM50	Uncharacterized protein OS=Homo sapiens GN=KRT19 PE=4 SV=1	0.289924	-0.454293	0.715214	0.380446	-0.616448	-0.00906586	0.183615	-0.0816893	0.265304
C9JN43	C9JN43	Uncharacterized protein OS=Homo sapiens GN=P4HA2 PE=4 SV=1	0.283076	-0.0979904	0.397263	0.171338	0.672861	-0.167832	0.194116	0.225455	-0.0313395
C9JN98	C9JN98	Uncharacterized protein OS=Homo sapiens GN=SERPINE2 PE=3 SV=1	0.368282		0.840711	1.44953		1.83562	0.604496	1.64258	-1.03808
C9JNR4	C9JNR4	Uncharacterized protein OS=Homo sapiens GN=RHOA PE=3 SV=1	1.51428	0.358341	0.799777	1.12256	2.69523	0.646516	0.890799	1.4881	-0.597303
C9JQ41	C9JQ41	Uncharacterized protein OS=Homo sapiens GN=CCDC58 PE=4 SV=1	-0.0801862	0.356809	0.872329	0.389318	0.848371	-0.27129	0.382984	0.322133	0.0608514
C9JQJ4	C9JQJ4	Uncharacterized protein OS=Homo sapiens GN=SEPT2 PE=4 SV=1	0.276305	0.363523	-0.00573581	-0.0942521	0.078736	0.811934	0.211364	0.265473	-0.0541084
C9JQR6	C9JQR6	Uncharacterized protein OS=Homo sapiens GN=PTK7 PE=4 SV=1	0.101443	0.0166308	0.208614	0.580328	0.0476196	0.38352	0.108896	0.337156	-0.22826
C9JRI6	C9JRI6	Uncharacterized protein OS=Homo sapiens GN=CDH13 PE=4 SV=2	-0.282927	0.387649	-0.164624	0.0241779	0.471481	0.0756823	-0.0199673	0.190447	-0.210414
C9JRL4	C9JRL4	Uncharacterized protein OS=Homo sapiens GN=MDH1 PE=4 SV=1	1.60727	0.632495	0.318601	1.11497	0.841985	0.0768762	0.852787	0.677944	0.174843
C9JRM1	C9JRM1	Uncharacterized protein OS=Homo sapiens GN=RHOA PE=4 SV=1	1.51428	0.431156	0.782048	1.12256	4.08534	0.269577	0.909161	1.82582	-0.916663
C9JTX5	C9JTX5	Uncharacterized protein OS=Homo sapiens GN=ACTB PE=3 SV=1	0.331882	0.233034	1.0641	0.469072	1.28403	0.305915	0.543004	0.686339	-0.143335
C9JU56	C9JU56	Uncharacterized protein OS=Homo sapiens GN=RPL31 PE=4 SV=1		1.02985	-0.337093		1.71386	-0.212179	0.346378	0.750839	-0.404461
C9JUM1	C9JUM1	Uncharacterized protein OS=Homo sapiens GN=ACTB PE=3 SV=1	1.07487	1.0106	1.66462	1.45975	2.07101	1.09578	1.25003	1.54218	-0.292145
C9JUP7	C9JUP7	Uncharacterized protein OS=Homo sapiens GN=VCP PE=4 SV=1	1.79237	0.962033	0.671421	2.78168	1.27231	1.26856	1.14194	1.77418	-0.63224
C9JVR8	C9JVR8	Uncharacterized protein OS=Homo sapiens GN=LASP1 PE=4 SV=1	0.449364	0.392371	0.182462	0.443613	1.11611	0.632466	0.341399	0.730731	-0.389332
C9JVT2	C9JVT2	Uncharacterized protein OS=Homo sapiens GN=SUCLG2 PE=3 SV=1	1.77145	1.15239	1.41049	1.44266	0.443051	0.666259	1.44478	0.850658	0.594121
C9JVW8	C9JVW8	Uncharacterized protein OS=Homo sapiens GN=ATP6V1A PE=4 SV=1	1.17452	0.975274	0.742452	2.86818	0.172178	1.30028	0.964083	1.44688	-0.482795
C9JVY5	C9JVY5	Uncharacterized protein OS=Homo sapiens GN=AKAP2 PE=4 SV=1	0.0324749	0.118445	0.0563168	0.344968	0.454765	0.304557	0.069079	0.368097	-0.299018
C9JX21	C9JX21	Uncharacterized protein OS=Homo sapiens GN=RHOA PE=3 SV=1	1.51428	0.358341	0.799777	1.12256	2.69523	0.646516	0.890799	1.4881	-0.597303
C9JX45	C9JX45	Uncharacterized protein OS=Homo sapiens GN=P4HA2 PE=4 SV=1	0.250717	0.259514	0.567814	0.251143	0.844989	0.129165	0.359348	0.408432	-0.0490839
C9JX84	C9JX84	Uncharacterized protein OS=Homo sapiens GN=ITIH3 PE=4 SV=2	0.0292594	0.360549	1.53416	-0.038153	0.109647	1.02445	0.641323	0.365315	0.276009
C9JXA5	C9JXA5	Uncharacterized protein OS=Homo sapiens GN=GNB2 PE=4 SV=1	-0.632111	1.75765	1.35529	-0.166021	1.80109	0.715912	0.826941	0.783661	0.0432806
C9JXZ0	C9JXZ0	Uncharacterized protein OS=Homo sapiens GN=PLOD2 PE=4 SV=1	0.362349	0.591992	0.415645	0.926727	0.625315	1.34416	0.456662	0.965401	-0.508739
C9JZD1	C9JZD1	Uncharacterized protein OS=Homo sapiens GN=ARPC3 PE=4 SV=1	1.21486	0.659727	0.591619	1.3412	0.375194	1.85211	0.82207	1.1895	-0.367431
C9JZN1	C9JZN1	Uncharacterized protein OS=Homo sapiens GN=GNB2 PE=4 SV=1	-1.05271	1.81899	1.51406	-0.868714	2.49401	1.03089	0.760111	0.885397	-0.125286
C9JZR7	C9JZR7	Uncharacterized protein OS=Homo sapiens GN=ACTB PE=3 SV=1	1.07487	1.0106	1.66462	1.45975	2.07101	1.09578	1.25003	1.54218	-0.292145
C9K028	C9K028	Uncharacterized protein OS=Homo sapiens GN=NME1 PE=4 SV=1	0.975331	-0.240069	1.50182	0.133678	-0.316755	1.59193	0.745695	0.469616	0.276079
C9K055	C9K055	Uncharacterized protein OS=Homo sapiens GN=PCYOX1 PE=4 SV=1	0.509823	1.34724	1.17706	-0.0978558	1.01938	0.384491	1.01137	0.435337	0.576037
Q5JTJ3	CA031	Uncharacterized protein C1orf31 OS=Homo sapiens GN=C1orf31 PE=2 SV=1	-0.349	0.0230959	0.113987	0.164077	0.764368	-0.495786	-0.070639	0.14422	-0.214859
Q9H425	CA198	Uncharacterized protein C1orf198 OS=Homo sapiens GN=C1orf198 PE=1 SV=1	0.0515808	-0.339811	0.00391692	0.63026	0.272893	0.588471	-0.0947713	0.497208	-0.591979
P55290	CAD13	Cadherin-13 OS=Homo sapiens GN=CDH13 PE=1 SV=1	-0.282927	0.387649	-0.164624	0.0241779	0.471481	0.0756823	-0.0199673	0.190447	-0.210414
P62158	CALM	Calmodulin OS=Homo sapiens GN=CALM1 PE=1 SV=2	0.475725	2.85611	-0.195645	0.686077	3.6455	0.163454	1.0454	1.49834	-0.452946
P27797	CALR	Calreticulin OS=Homo sapiens GN=CALR PE=1 SV=1	0.676839	1.16851	1.57451	1.60127	1.24233	1.58485	1.13996	1.47615	-0.336193
O43852	CALU	Calumenin OS=Homo sapiens GN=CALU PE=1 SV=2	0.62328	0.430908	0.756986	1.22126	0.731316	0.875255	0.603724	0.942611	-0.338887
P27824	CALX	Calnexin OS=Homo sapiens GN=CANX PE=1 SV=2	0.575286		1.41334	0.577498		0.606231	0.994315	0.591864	0.40245
Q01518	CAP1	Adenylyl cyclase-associated protein 1 OS=Homo sapiens GN=CAP1 PE=1 SV=5	0.728272	0.540079	0.0921536	0.589406	-0.00297166	0.871217	0.453501	0.485884	-0.0323822
P04040	CATA	Catalase OS=Homo sapiens GN=CAT PE=1 SV=3	0.0316353	0.434521	0.927028	0.789945	1.56972	0.332973	0.464394	0.897546	-0.433152
P07858	CATB	Cathepsin B OS=Homo sapiens GN=CTSB PE=1 SV=3	0.0895457	0.147704	0.55979	0.642261	0.783927	0.601305	0.26568	0.675831	-0.410151
P53634	CATC	Dipeptidyl peptidase 1 OS=Homo sapiens GN=CTSC PE=1 SV=2	-0.324509	0.703374	0.319216	0.224704	0.374252	0.262432	0.232693	0.287129	-0.054436
P07339	CATD	Cathepsin D OS=Homo sapiens GN=CTSD PE=1 SV=1	0.377181	0.638342	1.15652	1.12153	1.43492	1.14697	0.724014	1.23447	-0.510456
Q9UBR2	CATZ	Cathepsin Z OS=Homo sapiens GN=CTSZ PE=1 SV=1	-0.180189	1.06192	0.15462	0.456862	1.95859	-0.116792	0.345451	0.76622	-0.42077
Q03135	CAV1	Caveolin-1 OS=Homo sapiens GN=CAV1 PE=1 SV=4	1.63479	0.933512	1.13197	0.83537	-0.18898	1.45897	1.23342	0.701787	0.531635
P52907	CAZA1	F-actin-capping protein subunit alpha-1 OS=Homo sapiens GN=CAPZA1 PE=1 SV=3	1.10929	0.916749	0.755641	1.17352	1.47998	1.82961	0.927228	1.49437	-0.567143
P47755	CAZA2	F-actin-capping protein subunit alpha-2 OS=Homo sapiens GN=CAPZA2 PE=1 SV=3	0.873488	0.532979	0.625593	0.853109	1.68111	1.69567	0.677353	1.40996	-0.73261
P16152	CBR1	Carbonyl reductase [NADPH] 1 OS=Homo sapiens GN=CBR1 PE=1 SV=3	1.4102	0.788463	0.462678	0.922211	0.536848	1.1774	0.887115	0.87882	0.00829502
O75828	CBR3	Carbonyl reductase [NADPH] 3 OS=Homo sapiens GN=CBR3 PE=1 SV=3	1.19254	0.363436	0.0268803	0.378342	-0.378831	0.150838	0.527617	0.0501164	0.477501
Q4VC31	CCD58	Coiled-coil domain-containing protein 58 OS=Homo sapiens GN=CCDC58 PE=1 SV=1	-0.0801862	0.356809	0.872329	0.389318	0.848371	-0.27129	0.382984	0.322133	0.0608514
Q13740	CD166	CD166 antigen OS=Homo sapiens GN=ALCAM PE=1 SV=2	-0.080489	-0.178811	-0.0474733	0.302046	1.16307	-0.0177332	-0.102258	0.482462	-0.58472
Q9HCU0	CD248	Endosialin OS=Homo sapiens GN=CD248 PE=1 SV=1	0.624169	0.444815	0.780871	0.511789	0.73008	-0.332012	0.616618	0.303286	0.313333
P16671	CD36	Platelet glycoprotein 4 OS=Homo sapiens GN=CD36 PE=1 SV=2	0.325231	0.600353	1.51149	0.813949	0.617606	1.49566	0.81236	0.975737	-0.163377
P13987	CD59	CD59 glycoprotein OS=Homo sapiens GN=CD59 PE=1 SV=1	4.44078	5.21304	3.41944	4.7728	6.58756	2.55605	4.35775	4.63881	-0.281052
Q16543	CDC37	Hsp90 co-chaperone Cdc37 OS=Homo sapiens GN=CDC37 PE=1 SV=1	0.889289	0.557603	0.880035	1.01977	0.629937	1.71746	0.775642	1.12239	-0.346747
P60953	CDC42	Cell division control protein 42 homolog OS=Homo sapiens GN=CDC42 PE=1 SV=2	0.765102	0.946834	0.874481	0.250339	0.516114	-0.0263266	0.862139	0.246709	0.61543
P61604	CH10	10 kDa heat shock protein, mitochondrial OS=Homo sapiens GN=HSPE1 PE=1 SV=2	0.325034	0.631319	1.67195	0.419317	1.18378	-0.174185	0.8761	0.476303	0.399797
P10809	CH60	60 kDa heat shock protein, mitochondrial OS=Homo sapiens GN=HSPD1 PE=1 SV=2	1.25976	1.45357	2.02073	0.758821	0.219676	1.03978	1.57802	0.67276	0.905261
Q9NZZ3	CHMP5	Charged multivesicular body protein 5 OS=Homo sapiens GN=CHMP5 PE=1 SV=1	0.365652	0.0286585	0.0359529	0.094376	0.673447	0.894817	0.143421	0.554213	-0.410792
O75390	CISY	Citrate synthase, mitochondrial OS=Homo sapiens GN=CS PE=1 SV=2	0.21145	0.70355	0.815353	-7.76e-05	0.291975	-0.0997058	0.576784	0.0640639	0.512721
Q07065	CKAP4	Cytoskeleton-associated protein 4 OS=Homo sapiens GN=CKAP4 PE=1 SV=2	-0.00413763	0.264785	0.516138	-0.313011	0.507956	-0.360972	0.258928	-0.0553422	0.31427
P09496	CLCA	Clathrin light chain A OS=Homo sapiens GN=CLTA PE=1 SV=1	0.18746	0.0793918	0.690163	0.486902	0.305113	0.607564	0.319005	0.466526	-0.147521
Q00610	CLH1	Clathrin heavy chain 1 OS=Homo sapiens GN=CLTC PE=1 SV=5	0.502359	0.862133	0.536675	-0.370414	-0.382115	0.632247	0.633722	-0.0400942	0.673816
P53675	CLH2	Clathrin heavy chain 2 OS=Homo sapiens GN=CLTCL1 PE=1 SV=2	0.548194	0.701922	0.765932	-0.514803	-0.949513	1.36324	0.672016	-0.0336937	0.705709
O00299	CLIC1	Chloride intracellular channel protein 1 OS=Homo sapiens GN=CLIC1 PE=1 SV=4	1.17133	0.384203	0.737979	1.3832	0.404488	1.18043	0.764503	0.989373	-0.22487
Q9Y696	CLIC4	Chloride intracellular channel protein 4 OS=Homo sapiens GN=CLIC4 PE=1 SV=4	1.06983	0.429901	0.101188	0.371657	-0.248585	0.596357	0.53364	0.23981	0.29383
Q9Y224	CN166	UPF0568 protein C14orf166 OS=Homo sapiens GN=C14orf166 PE=1 SV=1	0.11136	0.239762	-0.0316713	0.178247	-0.0302043	-0.075697	0.106483	0.0241152	0.0823683
P51911	CNN1	Calponin-1 OS=Homo sapiens GN=CNN1 PE=1 SV=2	0.059649	-0.284191	-0.358117	1.18979	1.05115	0.915923	-0.19422	1.05229	-1.24651
Q99439	CNN2	Calponin-2 OS=Homo sapiens GN=CNN2 PE=1 SV=4	1.76342	1.02886	0.927116	1.57421	1.40531	1.50509	1.2398	1.49487	-0.25507
Q15417	CNN3	Calponin-3 OS=Homo sapiens GN=CNN3 PE=1 SV=1	1.06905	0.210498	0.271196	0.906126	0.770221	0.224802	0.516914	0.633717	-0.116802
Q9Y2B0	CNPY2	Protein canopy homolog 2 OS=Homo sapiens GN=CNPY2 PE=1 SV=1	0.117759	0.467186	0.582312	0.573924	0.469044	0.468387	0.389086	0.503785	-0.114699
Q9BT09	CNPY3	Protein canopy homolog 3 OS=Homo sapiens GN=CNPY3 PE=1 SV=1	0.215651	0.67179	0.25853	0.747085	0.289961	0.837347	0.38199	0.624798	-0.242807
P02452	CO1A1	Collagen alpha-1(I) chain OS=Homo sapiens GN=COL1A1 PE=1 SV=5	0.0874409	-0.0360386	0.235409	0.907438	1.1291	0.29994	0.0956038	0.778825	-0.683222
P08123	CO1A2	Collagen alpha-2(I) chain OS=Homo sapiens GN=COL1A2 PE=1 SV=7	0.297254	0.150364	0.501308	0.767225	1.41288	0.659629	0.316309	0.946579	-0.63027
P02461	CO3A1	Collagen alpha-1(III) chain OS=Homo sapiens GN=COL3A1 PE=1 SV=4	0.352728	1.01687	0.699198	0.392635	1.4265	0.475081	0.689597	0.76474	-0.0751428
P02462	CO4A1	Collagen alpha-1(IV) chain OS=Homo sapiens GN=COL4A1 PE=1 SV=3	2.26842	0.838457	0.424207	2.50119	0.81133	0.247934	1.17703	1.18682	-0.00978995
P20908	CO5A1	Collagen alpha-1(V) chain OS=Homo sapiens GN=COL5A1 PE=1 SV=3		0.258275	0.238559		0.715806	0.400401	0.248417	0.558103	-0.309686
P12109	CO6A1	Collagen alpha-1(VI) chain OS=Homo sapiens GN=COL6A1 PE=1 SV=3	0.511712	0.53532	0.843017	-0.161836	0.115459	0.110481	0.630016	0.0213682	0.608648
Q99715	COCA1	Collagen alpha-1(XII) chain OS=Homo sapiens GN=COL12A1 PE=1 SV=2	0.06221	0.489027	0.634797	0.244905	0.487078	1.28964	0.395345	0.673873	-0.278528
P23528	COF1	Cofilin-1 OS=Homo sapiens GN=CFL1 PE=1 SV=3	1.6269	0.600504	0.738449	1.73354	0.894291	1.46908	0.988617	1.36564	-0.37702
Q9Y281	COF2	Cofilin-2 OS=Homo sapiens GN=CFL2 PE=1 SV=1	1.26475	0.307658	1.0321	1.23043	0.618371	1.32926	0.868167	1.05935	-0.191187
P49747	COMP	Cartilage oligomeric matrix protein OS=Homo sapiens GN=COMP PE=1 SV=2	0.43574	0.409553	0.771191	0.377286	0.565318	0.436839	0.538828	0.459814	0.0790132
P35606	COPB2	Coatomer subunit beta' OS=Homo sapiens GN=COPB2 PE=1 SV=2	1.13947	0.350376	0.999069	0.453128	-0.629446	1.43803	0.829637	0.420571	0.409066
Q9BR76	COR1B	Coronin-1B OS=Homo sapiens GN=CORO1B PE=1 SV=1	1.68788	0.363926	-0.000119977	-0.126676	-0.0811393	0.348407	0.683897	0.0468639	0.637033
Q9ULV4	COR1C	Coronin-1C OS=Homo sapiens GN=CORO1C PE=1 SV=1	1.18762	0.335735	-0.0872622	0.122225	0.0906403	0.338479	0.478698	0.183781	0.294917
P20674	COX5A	Cytochrome c oxidase subunit 5A, mitochondrial OS=Homo sapiens GN=COX5A PE=1 SV=2	-0.15946	-0.400263	0.377132	0.256172	0.84989	-0.270221	-0.0608637	0.278613	-0.339477
P10606	COX5B	Cytochrome c oxidase subunit 5B, mitochondrial OS=Homo sapiens GN=COX5B PE=1 SV=2	-0.0476573	-0.0365379	0.569484	0.43775	1.12158	-0.411848	0.161763	0.382496	-0.220733
Q9BRF8	CPPED	Calcineurin-like phosphoesterase domain-containing protein 1 OS=Homo sapiens GN=CPPED1 PE=1 SV=3	1.3491		-0.192451	0.766781		-0.198627	0.578323	0.284077	0.294246
Q16630	CPSF6	Cleavage and polyadenylation specificity factor subunit 6 OS=Homo sapiens GN=CPSF6 PE=1 SV=2	0.310132	0.181008	0.646164	0.528647	1.48674	0.800316	0.379101	0.938567	-0.559466
P46109	CRKL	Crk-like protein OS=Homo sapiens GN=CRKL PE=1 SV=1	0.667792	0.302388	-1.00352	0.18447	-0.303106	0.434633	-0.0111119	0.105332	-0.116444
P02511	CRYAB	Alpha-crystallin B chain OS=Homo sapiens GN=CRYAB PE=1 SV=2	1.73073	0.703102	0.580409	-0.570487	-0.284107	-0.248479	1.00475	-0.367691	1.37244
Q969H8	CS010	UPF0556 protein C19orf10 OS=Homo sapiens GN=C19orf10 PE=1 SV=1	0.255613	0.174248	0.547267	0.641759	1.04547	0.652041	0.32571	0.779758	-0.454048
P13611	CSPG2	Versican core protein OS=Homo sapiens GN=VCAN PE=1 SV=3	-0.289717	0.433556	0.912141	0.479435	0.335541	0.818619	0.351993	0.544532	-0.192538
P21291	CSRP1	Cysteine and glycine-rich protein 1 OS=Homo sapiens GN=CSRP1 PE=1 SV=3	0.921111	0.438554	-0.0356808	0.1222	-0.34949	0.963442	0.441328	0.245384	0.195945
Q16527	CSRP2	Cysteine and glycine-rich protein 2 OS=Homo sapiens GN=CSRP2 PE=1 SV=3	0.654573	0.300112	0.0894127	-0.526126	0.124914	0.407344	0.348033	0.00204415	0.345989
P29279	CTGF	Connective tissue growth factor OS=Homo sapiens GN=CTGF PE=1 SV=2	0.209825	0.0829283	-0.359671	0.864121	0.308613	0.743564	-0.022306	0.638766	-0.661072
P14854	CX6B1	Cytochrome c oxidase subunit 6B1 OS=Homo sapiens GN=COX6B1 PE=1 SV=2	-0.670132	0.416519	1.78081	0.291072	1.0386	1.19009	0.509067	0.839918	-0.330851
P14406	CX7A2	Cytochrome c oxidase subunit 7A2, mitochondrial OS=Homo sapiens GN=COX7A2 PE=1 SV=1	0.0972236	0.468332	0.676814	0.349071	0.104465	0.170952	0.414123	0.208162	0.205961
P99999	CYC	Cytochrome c OS=Homo sapiens GN=CYCS PE=1 SV=2	0.650112	0.712152	0.956106	0.717269	0.380388	-0.136347	0.77279	0.320437	0.452353
O00622	CYR61	Protein CYR61 OS=Homo sapiens GN=CYR61 PE=1 SV=1	-0.135358	0.0230056	0.0534623	0.534938	1.21557	-0.0852122	-0.0196299	0.555098	-0.574728
Q69YQ0	CYTSA	Cytospin-A OS=Homo sapiens GN=SPECC1L PE=1 SV=2	-0.2138	0.39683	0.443255	0.180456	0.171637	0.482616	0.208762	0.278236	-0.0694748
D2D4A3	D2D4A3	Mitochondrial aldehyde dehydrogenase 4 family member A1 transcript variant ALDH4A1_v6 OS=Homo sapiens GN=ALDH4A1 PE=2 SV=1	0.454639	0.685451		-0.116479	0.451381	-0.539552	0.570045	-0.0682165	0.638261
D3DTL2	D3DTL2	Enolase OS=Homo sapiens GN=ENO3 PE=3 SV=1	1.6877	1.10978	1.05248	1.87985	1.16584	1.64826	1.28332	1.56465	-0.281329
D3YLG5	D3YLG5	Basigin (Ok blood group), isoform CRA_b OS=Homo sapiens GN=BSG PE=2 SV=1	-0.219817	0.0726976	0.121967	0.216451	0.685355	0.185794	-0.00838404	0.362533	-0.370917
D3YTA4	D3YTA4	HCG28765, isoform CRA_c OS=Homo sapiens GN=PALM2 PE=4 SV=1	-0.134595	-0.0903016	0.2943	-0.122771	0.276619	-0.0719217	0.0231347	0.0273087	-0.00417406
D3YTJ1	D3YTJ1	Uncharacterized protein OS=Homo sapiens GN=PDLIM5 PE=4 SV=1	0.964079	-0.0126123	0.305052	0.937082	1.37513	0.431471	0.41884	0.914562	-0.495722
D6PXK4	D6PXK4	Alpha actinin 4 short isoform OS=Homo sapiens GN=ACTN4 PE=2 SV=1	0.863072	0.931415	0.776098	1.37514	0.916799	1.52381	0.856862	1.27191	-0.415053
D6QS48	D6QS48	Calumenin isoform 4 OS=Homo sapiens GN=CALU PE=2 SV=1	0.710625	0.430908	0.741495	1.24672	0.731316	0.643399	0.627676	0.873812	-0.246136
D6R904	D6R904	Uncharacterized protein OS=Homo sapiens GN=TPM3 PE=4 SV=1	0.508205	0.203224	-0.175364	0.574461	0.694768	0.425776	0.178688	0.565002	-0.386314
D6R917	D6R917	Uncharacterized protein OS=Homo sapiens GN=GNPDA1 PE=4 SV=1	1.16882		-0.0162294	0.282419		-0.44122	0.576295	-0.0794002	0.655695
D6R938	D6R938	Calcium/calmodulin-dependent protein kinase (CaM kinase) II delta, isoform CRA_e OS=Homo sapiens GN=CAMK2D PE=4 SV=1	0.00221987	0.907341	0.878101	-0.0809043	-0.492182	0.775276	0.595887	0.0673964	0.528491
D6R956	D6R956	Uncharacterized protein OS=Homo sapiens GN=UCHL1 PE=4 SV=1	1.22089	0.795082	0.784098	1.19214	0.928601	1.37495	0.933357	1.16523	-0.231874
D6R974	D6R974	Uncharacterized protein OS=Homo sapiens GN=UCHL1 PE=4 SV=1	1.64134	1.05039	0.844915	1.17797	1.19102	1.36481	1.17888	1.2446	-0.065715
D6R9B6	D6R9B6	Ribosomal protein S3A, isoform CRA_e OS=Homo sapiens GN=RPS3A PE=4 SV=1	0.690601		0.471076	-0.402657		-0.364646	0.580839	-0.383652	0.96449
D6R9F5	D6R9F5	Uncharacterized protein OS=Homo sapiens GN=PALLD PE=4 SV=1	0.853658	0.971151	0.0248516	0.448671	-0.6944	1.25646	0.616554	0.336909	0.279645
D6R9L0	D6R9L0	Uncharacterized protein OS=Homo sapiens GN=GNB2L1 PE=4 SV=1	1.23875	0.907866	-0.00803718	0.752739	0.49075	0.589536	0.712859	0.611008	0.101851
D6R9P3	D6R9P3	Uncharacterized protein OS=Homo sapiens GN=HNRNPAB PE=4 SV=1	0.401631	2.29165	0.247999	0.223648	2.65185	-0.843877	0.980428	0.677208	0.30322
D6R9P4	D6R9P4	Uncharacterized protein OS=Homo sapiens GN=GNPDA1 PE=3 SV=1	1.0871		-0.0162294	0.0962143		-0.44122	0.535435	-0.172503	0.707938
D6R9Q9	D6R9Q9	Uncharacterized protein OS=Homo sapiens GN=DBN1 PE=4 SV=1	0.116325		0.183427	0.716831		-0.121996	0.149876	0.297417	-0.147542
D6R9T0	D6R9T0	Uncharacterized protein OS=Homo sapiens GN=HNRNPH1 PE=4 SV=1	0.257236	0.779808	0.319549	0.199112	1.21059	0.168487	0.452198	0.526064	-0.0738668
D6R9W4	D6R9W4	Uncharacterized protein OS=Homo sapiens GN=DBN1 PE=4 SV=1		0.914461	0.414355		0.655959	1.69014	0.664408	1.17305	-0.508639
D6R9Z1	D6R9Z1	Uncharacterized protein OS=Homo sapiens GN=GNB2L1 PE=4 SV=1	1.23875	0.907866	-0.00803718	0.752739	0.49075	0.589536	0.712859	0.611008	0.101851
D6RA32	D6RA32	Uncharacterized protein OS=Homo sapiens GN=MAP1B PE=4 SV=2	1.40714	0.894334	0.831192	-0.228696	-0.38003	0.758075	1.04422	0.0497831	0.99444
D6RA40	D6RA40	Uncharacterized protein OS=Homo sapiens GN=MAP1B PE=4 SV=1	1.209	0.596737	0.337852	-0.552228	-0.266917	-0.0647967	0.71453	-0.294647	1.00918
D6RA73	D6RA73	Uncharacterized protein OS=Homo sapiens GN=HSPA9 PE=3 SV=1	1.38626	1.52075	1.88458	1.40381	1.63573	0.605758	1.5972	1.2151	0.382101
D6RAC2	D6RAC2	Uncharacterized protein OS=Homo sapiens GN=GNB2L1 PE=4 SV=1	1.36718	0.808124	-0.116242	0.860943	0.506335	1.2772	0.686354	0.881494	-0.19514
D6RAF8	D6RAF8	Uncharacterized protein OS=Homo sapiens GN=HNRNPD PE=4 SV=1	0.174538	4.16192	0.309879	0.31467	5.37821	-0.59244	1.54878	1.70015	-0.151366
D6RAM1	D6RAM1	Uncharacterized protein OS=Homo sapiens GN=HNRNPH1 PE=4 SV=1	0.257236	0.779808	0.319549	0.199112	1.21059	0.168487	0.452198	0.526064	-0.0738668
D6RAN1	D6RAN1	Uncharacterized protein OS=Homo sapiens GN=PDLIM7 PE=4 SV=1		0.349374	0.231393		1.22508	1.0927	0.290383	1.15889	-0.868508
D6RAN4	D6RAN4	Uncharacterized protein OS=Homo sapiens GN=RPL9 PE=4 SV=1	1.27609	0.888328	1.04215	0.0504424	0.105745	1.12574	1.06886	0.42731	0.641545
D6RAQ3	D6RAQ3	Uncharacterized protein OS=Homo sapiens GN=LMNA PE=3 SV=1	0.552901	0.696903	1.20318	0.832247	0.940566	0.833975	0.817662	0.868929	-0.0512667
D6RAT0	D6RAT0	Uncharacterized protein OS=Homo sapiens GN=RPS3A PE=3 SV=1	0.690601		0.471076	-0.402657		-0.364646	0.580839	-0.383652	0.96449
D6RAU2	D6RAU2	Uncharacterized protein OS=Homo sapiens GN=GNB2L1 PE=4 SV=1	1.22735	1.00761	0.00336466	0.675996	0.827674	0.419356	0.746107	0.641009	0.105098
D6RAY7	D6RAY7	Uncharacterized protein OS=Homo sapiens GN=GNPDA1 PE=4 SV=1	1.0871		-0.0162294	0.0962143		-0.44122	0.535435	-0.172503	0.707938
D6RB09	D6RB09	Uncharacterized protein OS=Homo sapiens GN=RPS3A PE=3 SV=1	0.690601		0.471076	-0.402657		-0.364646	0.580839	-0.383652	0.96449
D6RB13	D6RB13	Uncharacterized protein OS=Homo sapiens GN=GNPDA1 PE=4 SV=1	1.16882		-0.0162294	0.282419		-0.44122	0.576295	-0.0794002	0.655695
D6RB78	D6RB78	Uncharacterized protein OS=Homo sapiens GN=PDLIM5 PE=4 SV=1	0.569008	-0.0126123	0.391339	0.413791	1.37513	0.560474	0.315912	0.783133	-0.467221
D6RBD0	D6RBD0	Uncharacterized protein OS=Homo sapiens GN=GNB2L1 PE=4 SV=1	1.51244	0.907866	-0.0621394	0.806841	0.49075	0.919663	0.786054	0.739084	0.0469694
D6RBE9	D6RBE9	Uncharacterized protein OS=Homo sapiens GN=ANXA5 PE=3 SV=1	0.980049	0.199545	0.507779	1.16073	0.596008	1.1955	0.562458	0.984077	-0.42162
D6RBL5	D6RBL5	Uncharacterized protein OS=Homo sapiens GN=ANXA5 PE=3 SV=1	0.980049	0.174431	0.512107	1.16073	0.405211	1.08518	0.555529	0.883707	-0.328178
D6RBM0	D6RBM0	Uncharacterized protein OS=Homo sapiens GN=HNRNPH1 PE=4 SV=1	0.21634	0.764382	0.385027	0.214538	0.761107	0.251315	0.45525	0.408987	0.0462628
D6RBT8	D6RBT8	Uncharacterized protein OS=Homo sapiens GN=UCHL1 PE=4 SV=1	1.22089	0.795082	0.784098	1.19214	0.928601	1.37495	0.933357	1.16523	-0.231874
D6RBZ0	D6RBZ0	Uncharacterized protein OS=Homo sapiens GN=HNRNPAB PE=4 SV=1	0.401631	2.29165	0.247999	0.223648	2.65185	-0.843877	0.980428	0.677208	0.30322
D6RC46	D6RC46	Uncharacterized protein OS=Homo sapiens GN=C14orf149 PE=4 SV=1	0.735843	-0.303536	-0.624249	0.511459	0.0384087	0.253281	-0.0639808	0.267716	-0.331697
D6RCN3	D6RCN3	Uncharacterized protein OS=Homo sapiens GN=ANXA5 PE=4 SV=1	0.620111	0.127631	0.124319	0.814467	0.42453	0.592455	0.290687	0.610484	-0.319797
D6RCR4	D6RCR4	Uncharacterized protein OS=Homo sapiens GN=DBN1 PE=4 SV=1		0.914461	0.414355		0.655959	1.69014	0.664408	1.17305	-0.508639
D6RD18	D6RD18	Uncharacterized protein OS=Homo sapiens GN=HNRNPAB PE=4 SV=1	0.401631	2.29165	0.247999	0.223648	2.65185	-0.843877	0.980428	0.677208	0.30322
D6RD46	D6RD46	Uncharacterized protein OS=Homo sapiens GN=LIMCH1 PE=4 SV=1	0.25692	0.295885	0.0394506	0.718864	1.25592	0.509506	0.197419	0.828096	-0.630678
D6RD66	D6RD66	Uncharacterized protein OS=Homo sapiens GN=WDR1 PE=4 SV=1	0.82455	-0.0379063	-0.324251	0.877869	0.699926	0.263287	0.154131	0.613694	-0.459563
D6RDF4	D6RDF4	Uncharacterized protein OS=Homo sapiens GN=GNB2L1 PE=4 SV=1	1.23875	0.907866	-0.00803718	0.752739	0.49075	0.589536	0.712859	0.611008	0.101851
D6RDU3	D6RDU3	Uncharacterized protein OS=Homo sapiens GN=HNRNPH1 PE=4 SV=1	0.257236	0.779808	0.319549	0.199112	1.21059	0.168487	0.452198	0.526064	-0.0738668
D6RDU5	D6RDU5	Uncharacterized protein OS=Homo sapiens GN=SEPT11 PE=3 SV=1	1.54359	0.969849	1.16982	0.540641	-0.136522	1.1151	1.22775	0.506406	0.721347
D6RE83	D6RE83	Uncharacterized protein OS=Homo sapiens GN=UCHL1 PE=4 SV=1	0.68151	0.38597	0.0670531	0.633114	0.25738	0.641174	0.378177	0.510556	-0.132378
D6REE5	D6REE5	Uncharacterized protein OS=Homo sapiens GN=GNB2L1 PE=4 SV=1	1.36718	0.808124	-0.116242	0.860943	0.506335	1.2772	0.686354	0.881494	-0.19514
D6REQ8	D6REQ8	Uncharacterized protein OS=Homo sapiens GN=HEXB PE=4 SV=1	-0.442048	-0.0102725	-0.12922	0.403287	0.409036	-1.58657	-0.193847	-0.258082	0.0642351
D6RER5	D6RER5	Uncharacterized protein OS=Homo sapiens GN=SEPT11 PE=3 SV=1	1.22352	0.911673	0.823152	0.654257	0.526493	0.977107	0.986115	0.719286	0.266829
D6RF19	D6RF19	Uncharacterized protein OS=Homo sapiens GN=DPYSL3 PE=4 SV=1	1.04051		-0.276498	0.894885		1.90372	0.382007	1.3993	-1.01729
D6RF44	D6RF44	Uncharacterized protein OS=Homo sapiens GN=HNRNPD PE=4 SV=1	0.174538	4.16192	0.309879	0.31467	5.37821	-0.59244	1.54878	1.70015	-0.151366
D6RF53	D6RF53	Uncharacterized protein OS=Homo sapiens GN=UCHL1 PE=4 SV=1	0.58223	0.128962	-0.187446	0.190809	-0.789755	0.386675	0.174582	-0.0707574	0.24534
D6RF83	D6RF83	Uncharacterized protein OS=Homo sapiens GN=PDLIM7 PE=4 SV=1		0.349374	0.231393		1.22508	1.0927	0.290383	1.15889	-0.868508
D6RFE4	D6RFE4	Uncharacterized protein OS=Homo sapiens GN=ADH5 PE=4 SV=1	1.45552	-0.163494	-0.819458	1.17623	0.717991	1.1476	0.157524	1.01394	-0.856416
D6RFF8	D6RFF8	Uncharacterized protein OS=Homo sapiens GN=GNPDA1 PE=4 SV=1	1.0871		-0.0162294	0.0962143		-0.44122	0.535435	-0.172503	0.707938
D6RFI1	D6RFI1	Uncharacterized protein OS=Homo sapiens GN=DBN1 PE=4 SV=1	0.70483	0.25782	0.00752871	0.551586	-0.238003	0.664525	0.323393	0.326036	-0.00264327
D6RFM2	D6RFM2	Uncharacterized protein OS=Homo sapiens GN=TPM3 PE=4 SV=1	0.10509	0.0892144	0.0995468	0.281606	0.697778	0.240598	0.0979505	0.406661	-0.30871
D6RFM3	D6RFM3	Uncharacterized protein OS=Homo sapiens GN=HNRNPH1 PE=4 SV=1	0.257236	0.779808	0.319549	0.199112	1.21059	0.168487	0.452198	0.526064	-0.0738668
D6RFM5	D6RFM5	Uncharacterized protein OS=Homo sapiens GN=SDHA PE=4 SV=1	-0.0242904	0.536739	0.773686	0.463356	0.741441	-0.65056	0.428712	0.184746	0.243966
D6RFX4	D6RFX4	Uncharacterized protein OS=Homo sapiens GN=GNB2L1 PE=4 SV=1	1.23875	0.907866	-0.00803718	0.752739	0.49075	0.589536	0.712859	0.611008	0.101851
D6RFZ9	D6RFZ9	Uncharacterized protein OS=Homo sapiens GN=GNB2L1 PE=4 SV=1	1.22735	1.00761	0.00336466	0.675996	0.827674	0.419356	0.746107	0.641009	0.105098
D6RG13	D6RG13	Uncharacterized protein OS=Homo sapiens GN=RPS3A PE=3 SV=1	0.690601		0.471076	-0.402657		-0.364646	0.580839	-0.383652	0.96449
D6RGG3	D6RGG3	Uncharacterized protein OS=Homo sapiens GN=COL12A1 PE=4 SV=1	0.06221	0.489027	0.634797	0.244905	0.487078	1.28964	0.395345	0.673873	-0.278528
D6RGI3	D6RGI3	Septin 11, isoform CRA_b OS=Homo sapiens GN=SEPT11 PE=3 SV=1	1.22352	0.911673	0.823152	0.654257	0.526493	0.977107	0.986115	0.719286	0.266829
D6RGV5	D6RGV5	Uncharacterized protein OS=Homo sapiens GN=COX7A2 PE=4 SV=1	0.0972236	0.468332	0.676814	0.349071	0.104465	0.170952	0.414123	0.208162	0.205961
D6RGZ6	D6RGZ6	Uncharacterized protein OS=Homo sapiens GN=VCAN PE=4 SV=1		0.433556	0.912141		0.335541	0.818619	0.672848	0.57708	0.0957682
D6RH06	D6RH06	Uncharacterized protein OS=Homo sapiens GN=PDLIM7 PE=4 SV=1		0.349374	0.231393		1.22508	1.0927	0.290383	1.15889	-0.868508
D6RHD5	D6RHD5	Uncharacterized protein OS=Homo sapiens GN=ALB PE=4 SV=1	1.19957		-0.153198	-0.3074		-0.053858	0.523184	-0.180629	0.703814
D6RHH4	D6RHH4	Uncharacterized protein OS=Homo sapiens GN=GNB2L1 PE=4 SV=1	1.23875	0.907866	-0.00803718	0.752739	0.49075	0.589536	0.712859	0.611008	0.101851
D6RIE3	D6RIE3	Uncharacterized protein OS=Homo sapiens GN=COX7A2 PE=4 SV=1	0.0972236	0.468332	0.676814	0.349071	0.104465	0.170952	0.414123	0.208162	0.205961
D6RIH9	D6RIH9	Uncharacterized protein OS=Homo sapiens GN=HNRNPH1 PE=4 SV=1	0.257236	0.779808	0.319549	0.199112	1.21059	0.168487	0.452198	0.526064	-0.0738668
D6RIT2	D6RIT2	Uncharacterized protein OS=Homo sapiens GN=HNRNPH1 PE=4 SV=1	0.257236	0.779808	0.319549	0.199112	1.21059	0.168487	0.452198	0.526064	-0.0738668
D6RIU0	D6RIU0	Uncharacterized protein OS=Homo sapiens GN=HNRNPH1 PE=4 SV=1	0.21634	0.764382	0.385027	0.214538	0.761107	0.251315	0.45525	0.408987	0.0462628
D6RJ04	D6RJ04	Uncharacterized protein OS=Homo sapiens GN=HNRNPH1 PE=4 SV=1	0.257236	0.779808	0.319549	0.199112	1.21059	0.168487	0.452198	0.526064	-0.0738668
D6RJI2	D6RJI2	Uncharacterized protein OS=Homo sapiens GN=HSPA9 PE=3 SV=1	1.38626	1.52075	1.88458	1.40381	1.63573	0.605758	1.5972	1.2151	0.382101
D9IX66	D9IX66	Platelet glycoprotein IV variant OS=Homo sapiens GN=CD36 PE=2 SV=1	0.325231	0.600353	1.51149	0.813949	0.617606	1.49566	0.81236	0.975737	-0.163377
D9IX68	D9IX68	Platelet glycoprotein IV variant OS=Homo sapiens GN=CD36 PE=2 SV=1	0.843508	0.600353	1.24409	0.960292	0.675062	0.837469	0.895982	0.824274	0.071708
D9YZV2	D9YZV2	Tropomyosin 1 (Alpha) isoform 5 OS=Homo sapiens GN=TPM1 PE=3 SV=1	0.124844	0.0886346	-0.207181	0.64512	1.19138	0.463252	0.00209905	0.766582	-0.764483
P98082	DAB2	Disabled homolog 2 OS=Homo sapiens GN=DAB2 PE=1 SV=3	0.130843	0.524843	-0.0142115	-0.0125533	-0.343365	0.572278	0.213825	0.0721199	0.141705
Q7Z4W1	DCXR	L-xylulose reductase OS=Homo sapiens GN=DCXR PE=1 SV=2	1.12192	0.478727	0.747421	0.293759	0.0119102	-1.44151	0.782688	-0.378614	1.1613
O95865	DDAH2	N(G),N(G)-dimethylarginine dimethylaminohydrolase 2 OS=Homo sapiens GN=DDAH2 PE=1 SV=1	2.13739	0.0618391	1.97873	2.29221	0.18418	1.53493	1.39265	1.33711	0.0555467
Q16531	DDB1	DNA damage-binding protein 1 OS=Homo sapiens GN=DDB1 PE=1 SV=1	0.33779	0.367007	0.213632	0.340795	0.591525	0.296105	0.306143	0.409475	-0.103332
O00571	DDX3X	ATP-dependent RNA helicase DDX3X OS=Homo sapiens GN=DDX3X PE=1 SV=3	1.05601		0.583817	-0.451618		0.226591	0.819914	-0.112514	0.932428
O15523	DDX3Y	ATP-dependent RNA helicase DDX3Y OS=Homo sapiens GN=DDX3Y PE=1 SV=2	1.05601		0.583817	-0.451618		0.226591	0.819914	-0.112514	0.932428
Q16698	DECR	2,4-dienoyl-CoA reductase, mitochondrial OS=Homo sapiens GN=DECR1 PE=1 SV=1	0.774438	0.915126	1.63341	0.468346	0.586396	0.628242	1.10766	0.560994	0.546663
Q9Y315	DEOC	Putative deoxyribose-phosphate aldolase OS=Homo sapiens GN=DERA PE=1 SV=2	0.139061	0.0470523	-0.416511	0.377245	-0.0527689	0.693622	-0.0767992	0.339366	-0.416165
P17661	DESM	Desmin OS=Homo sapiens GN=DES PE=1 SV=3	0.731698	0.879002	1.07167	0.0314456	0.194989	0.0329939	0.894124	0.0864761	0.807648
P60981	DEST	Destrin OS=Homo sapiens GN=DSTN PE=1 SV=3	1.12159		-0.271553	1.69313		0.00162001	0.42502	0.847374	-0.422354
P51659	DHB4	Peroxisomal multifunctional enzyme type 2 OS=Homo sapiens GN=HSD17B4 PE=1 SV=3	0.400632	0.461984	1.15352	-0.6006	-0.0694147	-1.02577	0.672044	-0.56526	1.2373
P00367	DHE3	Glutamate dehydrogenase 1, mitochondrial OS=Homo sapiens GN=GLUD1 PE=1 SV=2	0.266439	0.393139	0.784417	0.28109	0.475464	0.0719141	0.481332	0.276156	0.205176
P49448	DHE4	Glutamate dehydrogenase 2, mitochondrial OS=Homo sapiens GN=GLUD2 PE=1 SV=2	0.292874	0.415418	0.726759	0.279628	0.311057	-0.181351	0.47835	0.136445	0.341906
P09417	DHPR	Dihydropteridine reductase OS=Homo sapiens GN=QDPR PE=1 SV=2	1.10864	0.0889689	-0.0127901	0.334436	-0.175109	-0.205557	0.394938	-0.0154098	0.410348
P31040	DHSA	Succinate dehydrogenase [ubiquinone] flavoprotein subunit, mitochondrial OS=Homo sapiens GN=SDHA PE=1 SV=2	-0.0242904	0.392299	0.773686	0.379823	0.755385	-0.521644	0.380565	0.204521	0.176044
Q08211	DHX9	ATP-dependent RNA helicase A OS=Homo sapiens GN=DHX9 PE=1 SV=4	0.966512	0.799501	0.787473	0.5831	0.683803	0.948226	0.851162	0.738377	0.112785
Q01459	DIAC	Di-N-acetylchitobiase OS=Homo sapiens GN=CTBS PE=1 SV=1	-0.182615	-0.0599697	0.154332	0.0962995	-0.317893	-0.530625	-0.0294173	-0.25074	0.221322
Q9UBS4	DJB11	DnaJ homolog subfamily B member 11 OS=Homo sapiens GN=DNAJB11 PE=1 SV=1	0.215846	0.980116	0.496013	0.410569	-0.129938	0.603904	0.563991	0.294845	0.269147
P09622	DLDH	Dihydrolipoyl dehydrogenase, mitochondrial OS=Homo sapiens GN=DLD PE=1 SV=2	1.51533	0.513323	0.950506		0.231768	-0.253743	0.993054	-0.0109878	1.00404
Q9NP97	DLRB1	Dynein light chain roadblock-type 1 OS=Homo sapiens GN=DYNLRB1 PE=1 SV=3	-0.0557737	-0.386938	-0.00409586	0.274362	0.842856	0.583864	-0.148936	0.567027	-0.715963
Q8TF09	DLRB2	Dynein light chain roadblock-type 2 OS=Homo sapiens GN=DYNLRB2 PE=1 SV=1	-0.0557737	-0.386938	-0.00409586	0.274362	0.842856	0.583864	-0.148936	0.567027	-0.715963
Q9UHL4	DPP2	Dipeptidyl peptidase 2 OS=Homo sapiens GN=DPP7 PE=1 SV=3	-0.144686	0.352677	0.684328	0.31833	0.416863	-0.480397	0.29744	0.0849323	0.212507
Q9NY33	DPP3	Dipeptidyl peptidase 3 OS=Homo sapiens GN=DPP3 PE=1 SV=2	0.968293	-0.0879564	0.0390528	0.259926	0.0730963	1.16835	0.306463	0.500458	-0.193995
P27487	DPP4	Dipeptidyl peptidase 4 OS=Homo sapiens GN=DPP4 PE=1 SV=2	0.620503	0.151011	0.448333	0.872504	0.998132	-0.342656	0.406616	0.509327	-0.102711
Q14194	DPYL1	Dihydropyrimidinase-related protein 1 OS=Homo sapiens GN=CRMP1 PE=1 SV=1	0.821946	0.173771	-0.0171832	0.511174	1.05854	0.430239	0.326178	0.666651	-0.340473
Q16555	DPYL2	Dihydropyrimidinase-related protein 2 OS=Homo sapiens GN=DPYSL2 PE=1 SV=1	1.57334	0.787797	0.712369	1.24834	0.768077	1.30961	1.0245	1.10868	-0.0841752
Q14195	DPYL3	Dihydropyrimidinase-related protein 3 OS=Homo sapiens GN=DPYSL3 PE=1 SV=1	0.623417	-0.0185322	-0.424534	0.740189	0.401725	0.512191	0.0601171	0.551368	-0.491251
Q16643	DREB	Drebrin OS=Homo sapiens GN=DBN1 PE=1 SV=4	0.622086	0.305047	0.00752871	0.864473	-0.300173	0.664525	0.311554	0.409609	-0.0980545
P33316	DUT	Deoxyuridine 5'-triphosphate nucleotidohydrolase, mitochondrial OS=Homo sapiens GN=DUT PE=1 SV=4	0.0434394	0.16935	0.321946	0.25558	0.688394	-0.573047	0.178245	0.123643	0.0546024
P63167	DYL1	Dynein light chain 1, cytoplasmic OS=Homo sapiens GN=DYNLL1 PE=1 SV=1	0.328036	0.618479	0.447504	0.433497	-0.380799	0.751864	0.464673	0.268188	0.196486
Q96FJ2	DYL2	Dynein light chain 2, cytoplasmic OS=Homo sapiens GN=DYNLL2 PE=1 SV=1	0.426698	0.549747	0.453211	0.0338917	-1.0536	0.708862	0.476552	-0.103614	0.580167
E1B6W5	E1B6W5	Uncharacterized protein OS=Homo sapiens GN=SCP2 PE=4 SV=1	2.05178	-0.764574	-0.794709	1.95955	-1.0894	-0.484389	0.164165	0.128587	0.0355781
E2QRB9	E2QRB9	Uncharacterized protein OS=Homo sapiens GN=TXNRD1 PE=3 SV=1	1.34236	1.00513	1.21011	1.80087	1.42084	1.41597	1.18587	1.54589	-0.360026
E5RFF0	E5RFF0	Uncharacterized protein OS=Homo sapiens GN=ANXA6 PE=3 SV=1	0.797274	-0.00660814	-0.365996	0.51762	0.169008	0.569499	0.141557	0.418709	-0.277152
E5RFU4	E5RFU4	Uncharacterized protein OS=Homo sapiens GN=DPYSL2 PE=4 SV=1	1.00321	0.1255	0.273172	0.822425	0.0760147	0.762254	0.467293	0.553565	-0.0862714
E5RFU5	E5RFU5	Uncharacterized protein OS=Homo sapiens GN=RBMS3 PE=4 SV=1	0.189743		-0.0804288	-0.0860239		-0.1891	0.0546573	-0.137562	0.192219
E5RFV2	E5RFV2	Uncharacterized protein OS=Homo sapiens GN=DECR1 PE=4 SV=1	0.560753	0.881619	1.65214	0.55371	0.552889	1.30767	1.03151	0.804758	0.226747
E5RFY9	E5RFY9	Uncharacterized protein OS=Homo sapiens GN=C1orf198 PE=4 SV=1	0.31012	-0.00445722	-0.217679	0.857194	0.476357	0.1476	0.0293278	0.493717	-0.464389
E5RGE1	E5RGE1	Uncharacterized protein OS=Homo sapiens GN=YWHAZ PE=4 SV=1	0.313	-0.665873	0.239704	0.582556	1.28836	0.594348	-0.0377228	0.821755	-0.859478
E5RGH3	E5RGH3	Uncharacterized protein OS=Homo sapiens GN=PABPC1 PE=4 SV=1	2.72561		0.875389	1.54478		1.26884	1.8005	1.40681	0.393687
E5RGH4	E5RGH4	Uncharacterized protein OS=Homo sapiens GN=HNRNPH1 PE=4 SV=1	0.313683	0.592454	0.494588	0.347616	0.315738	0.509183	0.466909	0.390846	0.076063
E5RGM3	E5RGM3	Uncharacterized protein OS=Homo sapiens GN=SKP1 PE=4 SV=1	0.652012	0.815321	0.28067	0.222828	-0.991105	0.962982	0.582668	0.0649016	0.517766
E5RGV0	E5RGV0	Uncharacterized protein OS=Homo sapiens GN=HNRNPH1 PE=4 SV=1	0.21634	0.764382	0.385027	0.214538	0.761107	0.251315	0.45525	0.408987	0.0462628
E5RH24	E5RH24	Uncharacterized protein OS=Homo sapiens GN=PABPC1 PE=4 SV=1	2.72561		0.875389	1.54478		1.26884	1.8005	1.40681	0.393687
E5RH35	E5RH35	Uncharacterized protein OS=Homo sapiens PE=4 SV=1	-0.285716	-0.440888	0.0826109	0.665183	1.50334	0.733726	-0.214664	0.967415	-1.18208
E5RH53	E5RH53	Uncharacterized protein OS=Homo sapiens GN=FAM82B PE=4 SV=1	0.231108	-0.244497	0.260488	0.213062	0.221533	-0.528545	0.0823661	-0.0313166	0.113683
E5RH77	E5RH77	Uncharacterized protein OS=Homo sapiens GN=RPS14 PE=4 SV=1		0.653715	0.613658		-0.219721	0.425377	0.633687	0.102828	0.530859
E5RHP0	E5RHP0	Uncharacterized protein OS=Homo sapiens GN=NME1 PE=4 SV=1	1.06083	-0.325572	-0.453732	0.339388	-0.626971	0.411105	0.0938436	0.0411741	0.0526695
E5RI05	E5RI05	Uncharacterized protein OS=Homo sapiens GN=ANXA6 PE=3 SV=1	1.05901	0.168802	0.282677	1.48988	0.238804	0.711176	0.503497	0.813288	-0.309792
E5RI99	E5RI99	Uncharacterized protein OS=Homo sapiens GN=RPL30 PE=3 SV=1	0.313061	0.576645	2.27285	0.0220034	0.570146	2.58389	1.05419	1.05868	-0.00449322
E5RIR4	E5RIR4	Uncharacterized protein OS=Homo sapiens GN=YWHAZ PE=4 SV=1	0.313	-0.665873	0.239704	0.582556	1.28836	0.594348	-0.0377228	0.821755	-0.859478
E5RJA8	E5RJA8	Uncharacterized protein OS=Homo sapiens PE=4 SV=1	-0.285716	-0.440888	0.0826109	0.665183	1.50334	0.733726	-0.214664	0.967415	-1.18208
E5RJB9	E5RJB9	Uncharacterized protein OS=Homo sapiens GN=PABPC1 PE=4 SV=1	2.72561		0.875389	1.54478		1.26884	1.8005	1.40681	0.393687
E5RJD2	E5RJD2	Uncharacterized protein OS=Homo sapiens GN=DECR1 PE=4 SV=1	0.560753	0.881619	1.65214	0.55371	0.552889	1.30767	1.03151	0.804758	0.226747
E5RJF5	E5RJF5	Uncharacterized protein OS=Homo sapiens GN=ANXA6 PE=3 SV=1	0.632568	1.00015	0.320451	-0.27183	0.213888	0.541968	0.651057	0.161342	0.489715
E5RJG7	E5RJG7	Uncharacterized protein OS=Homo sapiens GN=DECR1 PE=4 SV=1	0.560753	0.881619	1.65214	0.55371	0.552889	1.30767	1.03151	0.804758	0.226747
E5RJP8	E5RJP8	Uncharacterized protein OS=Homo sapiens PE=4 SV=1	-0.285716	-0.440888	0.0826109	0.665183	1.50334	0.733726	-0.214664	0.967415	-1.18208
E5RJR5	E5RJR5	Uncharacterized protein OS=Homo sapiens GN=SKP1 PE=4 SV=1	0.652012	0.617407	0.610673	0.222828	-0.13271	0.470854	0.626697	0.186991	0.439707
E5RJZ7	E5RJZ7	Uncharacterized protein OS=Homo sapiens PE=4 SV=1	-0.285716	-0.440888	0.0826109	0.665183	1.50334	0.733726	-0.214664	0.967415	-1.18208
E5RK62	E5RK62	Uncharacterized protein OS=Homo sapiens GN=SPARC PE=4 SV=1	0.34685	0.443278	0.975661	0.353716	-0.154526	1.50719	0.588596	0.568792	0.0198044
E5RK63	E5RK63	Uncharacterized protein OS=Homo sapiens GN=ANXA6 PE=3 SV=1	0.632568	1.00015	0.320451	-0.27183	0.213888	0.541968	0.651057	0.161342	0.489715
E5RK69	E5RK69	Uncharacterized protein OS=Homo sapiens GN=ANXA6 PE=3 SV=1	2.67522	1.80616	1.47084	2.52733	2.0413	2.34727	1.98407	2.3053	-0.321226
E7EM57	E7EM57	Glucose-6-phosphate 1-dehydrogenase OS=Homo sapiens GN=G6PD PE=3 SV=1	1.60887	0.909343	0.196727	0.117051	-0.36679	0.497287	0.90498	0.0825161	0.822464
E7EM68	E7EM68	Uncharacterized protein OS=Homo sapiens GN=SCARB2 PE=4 SV=1	0.447459	0.394791	1.15244	0.258887	0.524355	0.891516	0.664897	0.558253	0.106644
E7EMA8	E7EMA8	Phosphoglycerate mutase OS=Homo sapiens GN=PGAM1 PE=3 SV=2	1.63755	0.994958	0.881333	1.78934	0.383045	1.67946	1.17128	1.28395	-0.112668
E7EMB3	E7EMB3	Uncharacterized protein OS=Homo sapiens GN=CALM2 PE=4 SV=1	0.475725	2.85611	-0.195645	0.686077	3.6455	0.163454	1.0454	1.49834	-0.452946
E7EMC6	E7EMC6	Uncharacterized protein OS=Homo sapiens GN=ANXA6 PE=3 SV=1	2.67305	1.81354	1.38926	2.52951	2.09776	2.3741	1.95862	2.33379	-0.375175
E7EMF9	E7EMF9	Uncharacterized protein OS=Homo sapiens GN=SUMF2 PE=4 SV=1	0.554292		0.528946	0.506341		0.0058825	0.541619	0.256112	0.285507
E7EMM4	E7EMM4	Uncharacterized protein OS=Homo sapiens GN=ASAH1 PE=4 SV=1	0.229375	0.970145	1.65975	0.982259	0.890035	1.63052	0.953089	1.16761	-0.214517
E7EMQ6	E7EMQ6	Uncharacterized protein OS=Homo sapiens GN=SUMF2 PE=4 SV=1	0.554292		0.528946	0.506341		0.0058825	0.541619	0.256112	0.285507
E7EMS2	E7EMS2	Uncharacterized protein OS=Homo sapiens GN=NPC2 PE=4 SV=1	1.43545	1.596	1.62513	1.52747	1.86705	0.955122	1.5522	1.44988	0.102316
E7EMV2	E7EMV2	Uncharacterized protein OS=Homo sapiens GN=NEFM PE=3 SV=1	0.165781	0.497376	1.23171	-0.128596	0.603128	0.423025	0.631624	0.299186	0.332438
E7EMX7	E7EMX7	Uncharacterized protein OS=Homo sapiens GN=RAI14 PE=4 SV=1	-0.293698	0.11541	0.282329	0.241858	0.464326	-0.186189	0.0346804	0.173332	-0.138651
E7EMY5	E7EMY5	Uncharacterized protein OS=Homo sapiens GN=GLOD4 PE=4 SV=1	0.470508	-0.496592	-0.208426	0.353959	0.355525	0.0696011	-0.0781702	0.259695	-0.337865
E7EN05	E7EN05	Uncharacterized protein OS=Homo sapiens GN=TST PE=4 SV=1		0.0534599	0.426034		0.372854	-0.116668	0.239747	0.128093	0.111654
E7EN40	E7EN40	Uncharacterized protein OS=Homo sapiens GN=HNRNPH1 PE=4 SV=1	0.180485	0.668647	0.356334	0.306715	0.957002	0.391374	0.401822	0.551697	-0.149875
E7EN95	E7EN95	Uncharacterized protein OS=Homo sapiens GN=FLNB PE=4 SV=1	0.937895	0.796062	0.57566	0.56707	0.331466	1.19894	0.769873	0.69916	0.0707125
E7ENA9	E7ENA9	Uncharacterized protein OS=Homo sapiens GN=NCSTN PE=4 SV=2	0.245261	0.475296	0.99708	0.311383	0.129589	1.74381	0.572546	0.728262	-0.155716
E7END7	E7END7	Uncharacterized protein OS=Homo sapiens GN=RAB1A PE=3 SV=1	0.726885	0.834736	0.808901	0.355097	0.178106	0.88465	0.790174	0.472618	0.317556
E7ENH1	E7ENH1	Uncharacterized protein OS=Homo sapiens GN=TUBB PE=3 SV=1	1.2082	0.630863	0.463212	0.853098	0.124986	1.23347	0.767426	0.737184	0.0302413
E7ENH9	E7ENH9	Uncharacterized protein OS=Homo sapiens GN=ACLY PE=4 SV=2	0.963533	0.685667	0.600255	-0.052686	-0.842722	0.747225	0.749818	-0.0493944	0.799213
E7ENQ5	E7ENQ5	Uncharacterized protein OS=Homo sapiens GN=ANXA5 PE=3 SV=1	1.44969	0.665589	0.900558	1.54315	1.10691	1.3119	1.00528	1.32065	-0.315376
E7ENR3	E7ENR3	Uncharacterized protein OS=Homo sapiens GN=CNN2 PE=4 SV=1	1.03143	0.27777	0.234196	0.912388	1.08057	0.391936	0.514466	0.794965	-0.280499
E7ENR4	E7ENR4	Uncharacterized protein OS=Homo sapiens GN=HK1 PE=3 SV=1	0.63312	0.801409	0.926855	0.576021	0.65786	0.991478	0.787128	0.741787	0.0453417
E7ENX0	E7ENX0	Uncharacterized protein OS=Homo sapiens GN=P4HA2 PE=4 SV=1	0.250717	0.259514	0.567814	0.251143	0.844989	0.129165	0.359348	0.408432	-0.0490839
E7ENY0	E7ENY0	Uncharacterized protein OS=Homo sapiens GN=ADD1 PE=4 SV=1		0.520916	0.297474		0.0236494	0.402444	0.409195	0.213047	0.196148
E7ENY8	E7ENY8	Uncharacterized protein OS=Homo sapiens GN=COL3A1 PE=4 SV=1	0.420662	1.83193	0.684755	0.36412	1.4265	0.475081	0.979117	0.755235	0.223882
E7ENY9	E7ENY9	Adenylyl cyclase-associated protein OS=Homo sapiens GN=CAP1 PE=3 SV=2	0.722955	0.359104	0.0292383	0.583098	-0.195126	0.884389	0.370432	0.42412	-0.0536879
E7ENZ3	E7ENZ3	Uncharacterized protein OS=Homo sapiens GN=CCT5 PE=4 SV=1	0.769648	0.43174	0.211286	-0.499809	-0.449598	0.494376	0.470891	-0.151677	0.622568
E7EP11	E7EP11	Uncharacterized protein OS=Homo sapiens GN=HSPA1A PE=3 SV=1	0.414926	0.6103	0.387051	0.23489	0.480545	0.670708	0.470759	0.462048	0.00871133
E7EP32	E7EP32	Uncharacterized protein OS=Homo sapiens GN=GNB2 PE=4 SV=1	-0.231708	1.75765	1.51406	-0.273413	1.80109	1.03089	1.01333	0.852857	0.160476
E7EP74	E7EP74	Uncharacterized protein OS=Homo sapiens GN=GOLGB1 PE=4 SV=1		-0.995585	0.49581		1.40757	0.259559	-0.249887	0.833563	-1.08345
E7EP94	E7EP94	Uncharacterized protein OS=Homo sapiens GN=HSPA1A PE=3 SV=2	0.517826	0.773875	0.502726	0.431657	0.411367	1.1015	0.598143	0.648174	-0.0500315
E7EP96	E7EP96	Uncharacterized protein OS=Homo sapiens GN=KHSRP PE=4 SV=1	0.180653	1.16759	0.397963	0.233865	1.83831	-0.171437	0.582069	0.633579	-0.0515105
E7EPA6	E7EPA6	Uncharacterized protein OS=Homo sapiens GN=LAMB1 PE=4 SV=1	0.0731717	0.645239		0.0808509	0.0730455		0.359205	0.0769482	0.282257
E7EPA7	E7EPA7	Uncharacterized protein OS=Homo sapiens GN=TKT PE=4 SV=1	4.47068	4.04158	3.83562	4.27387	4.54654	3.90559	4.11596	4.242	-0.12604
E7EPA8	E7EPA8	Uncharacterized protein OS=Homo sapiens GN=P4HB PE=3 SV=2	0.741875	0.686045	0.998909	1.29545	0.766284	1.28903	0.808943	1.11692	-0.30798
E7EPB0	E7EPB0	Uncharacterized protein OS=Homo sapiens GN=DDB1 PE=4 SV=1	0.33779	0.367007	0.213632	0.340795	0.591525	0.296105	0.306143	0.409475	-0.103332
E7EPB3	E7EPB3	Uncharacterized protein OS=Homo sapiens GN=RPL14 PE=4 SV=1	0.195192	1.12438	0.855545	-0.199879	0.335171	0.238064	0.72504	0.124452	0.600588
E7EPC9	E7EPC9	Uncharacterized protein OS=Homo sapiens GN=EIF4B PE=4 SV=1	0.853459	0.797009	0.303784	0.833522	0.759011	0.583263	0.651418	0.725265	-0.0738477
E7EPD0	E7EPD0	Uncharacterized protein OS=Homo sapiens GN=TOM1 PE=4 SV=1	-0.795	0.0685163	-1.13627	0.52024	1.2422	0.337959	-0.620918	0.700133	-1.32105
E7EPI9	E7EPI9	Uncharacterized protein OS=Homo sapiens GN=P4HA2 PE=4 SV=1	0.250717	0.259514	0.567814	0.251143	0.844989	0.129165	0.359348	0.408432	-0.0490839
E7EPK0	E7EPK0	Uncharacterized protein OS=Homo sapiens GN=LIMCH1 PE=4 SV=1	0.25692	0.295885	0.0908764	0.718864	1.25592	0.43104	0.21456	0.801941	-0.58738
E7EPK1	E7EPK1	Uncharacterized protein OS=Homo sapiens GN=SEPT7 PE=3 SV=1	0.490367	0.48534	0.407963	0.234743	0.560266	0.173634	0.461223	0.322881	0.138342
E7EPK6	E7EPK6	Uncharacterized protein OS=Homo sapiens GN=RPS24 PE=4 SV=1	0.0569377	1.70396	0.18302	0.00555678	-0.547962	1.13564	0.647972	0.197746	0.450226
E7EPT3	E7EPT3	Uncharacterized protein OS=Homo sapiens GN=ALDH7A1 PE=3 SV=1	0.420781	0.833319	0.788226	0.317685	0.462978	-0.424999	0.680775	0.118555	0.562221
E7EPW1	E7EPW1	Uncharacterized protein OS=Homo sapiens GN=GAPDH PE=3 SV=1	1.04176	0.43601	0.83561	1.30683	0.812954	1.07222	0.771125	1.064	-0.292877
E7EPY6	E7EPY6	Uncharacterized protein OS=Homo sapiens GN=CAST PE=4 SV=1	0.75673	1.49971	0.391837	0.433647	-0.0111775	0.628402	0.88276	0.350291	0.53247
E7EPZ3	E7EPZ3	Uncharacterized protein OS=Homo sapiens GN=TOM1 PE=4 SV=2	-0.795	0.0685163	-1.13627	0.52024	1.2422	0.337959	-0.620918	0.700133	-1.32105
E7EQ12	E7EQ12	Uncharacterized protein OS=Homo sapiens GN=CAST PE=4 SV=1	0.75673	1.49971	0.391837	0.433647	-0.0111775	0.628402	0.88276	0.350291	0.53247
E7EQ29	E7EQ29	Uncharacterized protein OS=Homo sapiens GN=GLB1 PE=4 SV=1	0.493373	0.556452	1.12247	1.18756	0.724451	1.36845	0.724098	1.09349	-0.36939
E7EQ40	E7EQ40	Uncharacterized protein OS=Homo sapiens GN=CAPZB PE=4 SV=1	0.678204	0.505713	0.407249	0.533547	1.02101	0.216319	0.530388	0.590292	-0.0599033
E7EQ93	E7EQ93	Uncharacterized protein OS=Homo sapiens GN=STOM PE=4 SV=2	0.491558	0.677559	0.977067	0.421756	0.0324735	0.396226	0.715395	0.283485	0.431909
E7EQA0	E7EQA0	Uncharacterized protein OS=Homo sapiens GN=CAST PE=4 SV=1	0.75673	1.49971	0.391837	0.433647	-0.0111775	0.628402	0.88276	0.350291	0.53247
E7EQG2	E7EQG2	Uncharacterized protein OS=Homo sapiens GN=EIF4A2 PE=3 SV=1	0.696528	0.466372	0.56098	0.488224	0.682145	0.972993	0.574627	0.714454	-0.139827
E7EQJ0	E7EQJ0	Uncharacterized protein OS=Homo sapiens GN=HNRNPH1 PE=4 SV=1	0.257236	0.779808	0.319549	0.199112	1.21059	0.168487	0.452198	0.526064	-0.0738668
E7EQL7	E7EQL7	Uncharacterized protein OS=Homo sapiens GN=HSPA1A PE=3 SV=1	1.86192	1.28008	1.38873	1.42577	1.4322	0.789028	1.51024	1.21566	0.29458
E7EQR4	E7EQR4	Uncharacterized protein OS=Homo sapiens GN=EZR PE=4 SV=2	0.37461	-0.0797125	-0.309589	0.466458	0.545244	1.16308	-0.00489719	0.724926	-0.729823
E7EQR6	E7EQR6	T-complex protein 1 subunit alpha OS=Homo sapiens GN=TCP1 PE=3 SV=1		0.955994	0.642784		-0.133171	-0.214626	0.799389	-0.173898	0.973288
E7EQS9	E7EQS9	Uncharacterized protein OS=Homo sapiens GN=C22orf28 PE=4 SV=2	0.373803	0.333546	0.293962	0.175782	0.194881	0.378373	0.33377	0.249679	0.0840917
E7EQV3	E7EQV3	Uncharacterized protein OS=Homo sapiens GN=PABPC1 PE=4 SV=1	0.319645	1.05482	0.475906	0.603065	1.04817	-0.0740593	0.616789	0.525725	0.0910645
E7EQV5	E7EQV5	Uncharacterized protein OS=Homo sapiens GN=ACTA1 PE=3 SV=1	3.12803	3.00572	3.45247	3.65816	4.69345	3.42115	3.19541	3.92425	-0.728846
E7EQV7	E7EQV7	Uncharacterized protein OS=Homo sapiens GN=KRT6C PE=3 SV=2	-0.923484	-1.1678	1.83659	1.58663	-0.355416	-1.98348	-0.0848971	-0.250756	0.165859
E7EQZ9	E7EQZ9	Uncharacterized protein OS=Homo sapiens GN=PRKCSH PE=4 SV=1	0.37247	0.47301	0.566245	0.307259	0.625696	-0.176436	0.470575	0.252173	0.218402
E7ER14	E7ER14	Uncharacterized protein OS=Homo sapiens GN=VDAC1 PE=4 SV=1	0.499134	0.242447	0.764052		-0.195926		0.501878	-0.195926	0.697804
E7ER27	E7ER27	Uncharacterized protein OS=Homo sapiens GN=HSD17B4 PE=3 SV=3		0.461984	1.15352		-0.0694147	-1.02577	0.80775	-0.54759	1.35534
E7ERA1	E7ERA1	Uncharacterized protein OS=Homo sapiens GN=FN1 PE=4 SV=1	-0.0923144	-0.295907	0.173829	0.00398594	0.580697	0.590271	-0.0714642	0.391651	-0.463115
E7ERA5	E7ERA5	Uncharacterized protein OS=Homo sapiens GN=MYH10 PE=4 SV=1	1.05231	0.864834	0.67691	0.719836	0.377002	0.633591	0.864686	0.57681	0.287876
E7ERE4	E7ERE4	Uncharacterized protein OS=Homo sapiens GN=HNRNPR PE=4 SV=1	0.0870138	0.384505	0.485659	0.118812	-0.0461107	0.103226	0.319059	0.0586427	0.260417
E7ERH2	E7ERH2	Uncharacterized protein OS=Homo sapiens GN=SKP1 PE=4 SV=1	0.652012	0.617407	0.610673	0.222828	-0.13271	0.470854	0.626697	0.186991	0.439707
E7ERH5	E7ERH5	Phosphoglycerate kinase OS=Homo sapiens GN=PGK1 PE=3 SV=1	1.04393	-0.228169	0.780402	0.675254	-0.282681	1.47393	0.532053	0.622167	-0.0901142
E7ERI1	E7ERI1	Uncharacterized protein OS=Homo sapiens GN=P4HA2 PE=4 SV=1	0.250717	0.259514	0.567814	0.251143	0.844989	0.129165	0.359348	0.408432	-0.0490839
E7ERJ4	E7ERJ4	Uncharacterized protein OS=Homo sapiens GN=HNRNPA3 PE=4 SV=2	-0.195011	-0.0797791	0.283992	0.468934	0.836598	0.378327	0.00306729	0.561287	-0.558219
E7ERJ7	E7ERJ7	Uncharacterized protein OS=Homo sapiens GN=PABPC1 PE=4 SV=1	0.319645	1.05482	0.475906	0.603065	1.04817	-0.0740593	0.616789	0.525725	0.0910645
E7ERL0	E7ERL0	Uncharacterized protein OS=Homo sapiens GN=NME1 PE=3 SV=1	1.61078	0.395384	0.298561	0.769131	0.217446	0.790851	0.768243	0.592476	0.175767
E7ERL1	E7ERL1	Uncharacterized protein OS=Homo sapiens GN=UBA1 PE=3 SV=1	0.736253	0.365166	0.195037	0.610036	-0.397265	1.6597	0.432152	0.624158	-0.192006
E7ERV9	E7ERV9	Uncharacterized protein OS=Homo sapiens GN=ASAH1 PE=4 SV=1	0.229375	0.970145	1.65975	0.982259	0.890035	1.63052	0.953089	1.16761	-0.214517
E7ERW2	E7ERW2	Aspartate aminotransferase OS=Homo sapiens GN=GOT2 PE=3 SV=1	0.934139	0.354422	0.312501	0.492904	0.0319837	0.282272	0.533687	0.269053	0.264634
E7ES10	E7ES10	Uncharacterized protein OS=Homo sapiens GN=CAST PE=4 SV=1	0.75673	1.49971	0.391837	0.433647	-0.0111775	0.628402	0.88276	0.350291	0.53247
E7ES33	E7ES33	Uncharacterized protein OS=Homo sapiens GN=SEPT7 PE=3 SV=2	0.490367	0.48534	0.407963	0.234743	0.560266	0.173634	0.461223	0.322881	0.138342
E7ES34	E7ES34	Uncharacterized protein OS=Homo sapiens GN=KRT7 PE=3 SV=2	0.1546	0.997098	0.323424	0.322639	0.014	0.551752	0.491707	0.29613	0.195577
E7ESD2	E7ESD2	Uncharacterized protein OS=Homo sapiens GN=FAM21A PE=4 SV=2	0.304454	0.0177841	0.485236	0.443356	-0.232379	1.01501	0.269158	0.408663	-0.139505
E7ESH4	E7ESH4	Uncharacterized protein OS=Homo sapiens GN=HSPD1 PE=3 SV=1	1.45034	1.37719	1.86304	0.912426	0.380601	0.972368	1.56352	0.755132	0.808393
E7ESI6	E7ESI6	Uncharacterized protein OS=Homo sapiens GN=TXNRD1 PE=3 SV=2	1.34236	1.00513	1.21011	1.80087	1.42084	1.41597	1.18587	1.54589	-0.360026
E7ESK7	E7ESK7	Uncharacterized protein OS=Homo sapiens GN=YWHAZ PE=4 SV=1	0.282369	-0.49095	0.120319	0.685076	0.748253	0.583188	-0.0294208	0.672173	-0.701593
E7ESM6	E7ESM6	Uncharacterized protein OS=Homo sapiens GN=SND1 PE=4 SV=2	1.04801	0.341361	0.819274	0.203694	0.544581	0.869227	0.736216	0.539167	0.197048
E7ESM9	E7ESM9	Uncharacterized protein OS=Homo sapiens GN=CAST PE=4 SV=1	0.75673	1.49971	0.391837	0.433647	-0.0111775	0.628402	0.88276	0.350291	0.53247
E7ESP9	E7ESP9	Uncharacterized protein OS=Homo sapiens GN=NEFM PE=3 SV=1	0.165781	0.497376	1.23171	-0.128596	0.603128	0.423025	0.631624	0.299186	0.332438
E7ESU5	E7ESU5	Uncharacterized protein OS=Homo sapiens GN=ALB PE=4 SV=2	1.19957		-0.153198	-0.3074		-0.053858	0.523184	-0.180629	0.703814
E7ESV4	E7ESV4	Uncharacterized protein OS=Homo sapiens GN=RAP1B PE=4 SV=1		1.58195	1.57654		1.67459	0.809911	1.57924	1.24225	0.336993
E7ET08	E7ET08	Uncharacterized protein OS=Homo sapiens GN=HSPA8 PE=3 SV=1	1.67171	1.41104	1.47331	1.79791	1.86236	1.93172	1.51869	1.864	-0.345311
E7ET17	E7ET17	Uncharacterized protein OS=Homo sapiens GN=HSD17B4 PE=4 SV=1	0.400632	0.461984	1.15352	-0.6006	-0.0694147	-1.02577	0.672044	-0.56526	1.2373
E7ET24	E7ET24	Uncharacterized protein OS=Homo sapiens GN=TUBA1B PE=4 SV=1	1.19354	0.484864	0.00345826	0.581524	-1.10059	0.625513	0.560621	0.035482	0.525139
E7ET30	E7ET30	Uncharacterized protein OS=Homo sapiens GN=AK3 PE=3 SV=1	0.432851	0.69845	0.347695	0.804203	-0.959945	-0.186486	0.492999	-0.114076	0.607075
E7ET33	E7ET33	Uncharacterized protein OS=Homo sapiens GN=ITIH3 PE=4 SV=1	0.0292594	0.360549	1.53416	-0.038153	0.109647	1.02445	0.641323	0.365315	0.276009
E7ETA0	E7ETA0	Uncharacterized protein OS=Homo sapiens GN=YBX1 PE=4 SV=1	0.129677	0.507102		0.701964	1.49895		0.318389	1.10046	-0.782067
E7ETK0	E7ETK0	40S ribosomal protein S24 OS=Homo sapiens GN=RPS24 PE=3 SV=1	0.0569377	1.70396	0.18302	0.00555678	-0.547962	1.13564	0.647972	0.197746	0.450226
E7ETK2	E7ETK2	Uncharacterized protein OS=Homo sapiens GN=RAB1A PE=4 SV=2	0.540789	0.551795	0.69558	0.481575	0.198681	0.429634	0.596054	0.369963	0.226091
E7ETK8	E7ETK8	Uncharacterized protein OS=Homo sapiens GN=AARS PE=3 SV=1	1.1697	0.435983	0.0121962	0.669856	0.29823	0.207551	0.539292	0.391879	0.147412
E7ETM7	E7ETM7	Uncharacterized protein OS=Homo sapiens GN=HNRNPR PE=4 SV=1	0.0901384	0.381332	0.430765	0.118751	-0.116204	-0.0364789	0.300745	-0.0113106	0.312056
E7ETM8	E7ETM8	Uncharacterized protein OS=Homo sapiens GN=NEXN PE=4 SV=1	1.29678	1.86289	0.468882	2.27717	2.63712	0.301328	1.20951	1.73854	-0.529027
E7ETR0	E7ETR0	Uncharacterized protein OS=Homo sapiens GN=RUVBL1 PE=4 SV=1	0.669244	0.507011	0.785943	0.21298	-0.195919	-0.0297773	0.654066	-0.00423869	0.658305
E7ETU3	E7ETU3	Uncharacterized protein OS=Homo sapiens GN=CDC42 PE=3 SV=1	1.12844	0.5427	0.661828	0.51888	0.222377	0.410533	0.777656	0.38393	0.393726
E7ETU5	E7ETU5	Uncharacterized protein OS=Homo sapiens GN=RBMS1 PE=4 SV=1	0.189743	0.126002	0.196259	-0.0860239	0.428721	-0.162357	0.170668	0.0601132	0.110555
E7ETU9	E7ETU9	Uncharacterized protein OS=Homo sapiens GN=PLOD2 PE=4 SV=1	0.269442	0.428959	0.233446	0.593841	0.961323	0.684893	0.310616	0.746686	-0.43607
E7ETZ0	E7ETZ0	Uncharacterized protein OS=Homo sapiens GN=CALM1 PE=4 SV=1	0.475725	2.85611	-0.195645	0.686077	3.6455	0.163454	1.0454	1.49834	-0.452946
E7EU05	E7EU05	Uncharacterized protein OS=Homo sapiens GN=CD36 PE=4 SV=2	0.325231	0.600353	1.51149	0.813949	0.617606	1.49566	0.81236	0.975737	-0.163377
E7EU23	E7EU23	Uncharacterized protein OS=Homo sapiens GN=GDI2 PE=4 SV=1	0.806415	0.59085	0.621217	0.55384	0.612042	1.53341	0.672827	0.899763	-0.226936
E7EU54	E7EU54	Glyceraldehyde-3-phosphate dehydrogenase OS=Homo sapiens GN=GAPDH PE=3 SV=1	0.625369	-0.281033	0.0147543	1.3526	0.435988	0.817666	0.119697	0.86875	-0.749054
E7EU87	E7EU87	Uncharacterized protein OS=Homo sapiens GN=KRT5 PE=3 SV=1	-0.522136		1.81134	1.73966		-1.21281	0.644603	0.263427	0.381175
E7EUA0	E7EUA0	Uncharacterized protein OS=Homo sapiens GN=NEXN PE=4 SV=1	0.498693	1.86289	0.468882	1.41946	2.63712	0.301328	0.943487	1.45264	-0.509149
E7EUE5	E7EUE5	Uncharacterized protein OS=Homo sapiens GN=ALDH2 PE=3 SV=1	0.326009	0.612368	1.00223	0.0266132	0.253743	-0.642469	0.646868	-0.120704	0.767572
E7EUE8	E7EUE8	Uncharacterized protein OS=Homo sapiens GN=KRT6A PE=3 SV=2	-0.921436	-0.908659	1.83659	1.57844	-0.535947	-1.98348	0.00216625	-0.313664	0.31583
E7EUG1	E7EUG1	Uncharacterized protein OS=Homo sapiens GN=HSPH1 PE=3 SV=1	0.933492	0.0683166	0.22153	0.3884	0.772059	0.426214	0.407779	0.528891	-0.121111
E7EUI8	E7EUI8	Glucose-6-phosphate 1-dehydrogenase OS=Homo sapiens GN=G6PD PE=3 SV=1	1.60887	0.909343	0.196727	0.117051	-0.36679	0.497287	0.90498	0.0825161	0.822464
E7EUI9	E7EUI9	Uncharacterized protein OS=Homo sapiens GN=LMNA PE=3 SV=1	0.552901	0.696903	1.20318	0.832247	0.940566	0.833975	0.817662	0.868929	-0.0512667
E7EUJ4	E7EUJ4	Pyruvate kinase OS=Homo sapiens GN=PKM2 PE=3 SV=1	1.18544	0.473162	0.236185	1.35563	0.420213	1.54531	0.631597	1.10705	-0.475454
E7EUJ8	E7EUJ8	Uncharacterized protein OS=Homo sapiens GN=CKB PE=3 SV=2	0.946278	0.882615	0.295606	0.697808	-0.168123	0.549672	0.708167	0.359786	0.348381
E7EUQ8	E7EUQ8	Pyruvate kinase OS=Homo sapiens GN=PKM2 PE=3 SV=1	1.19652	0.3709	0.271236	1.26828	0.420213	1.43505	0.612887	1.04118	-0.428296
E7EUR9	E7EUR9	Uncharacterized protein OS=Homo sapiens GN=CALD1 PE=4 SV=1	0.559003	0.155681	0.104924	0.955328	1.47744	0.663915	0.273203	1.03223	-0.759025
E7EUT4	E7EUT4	Glyceraldehyde-3-phosphate dehydrogenase OS=Homo sapiens GN=GAPDH PE=3 SV=1	1.02771	0.425758	0.693027	1.41608	0.962744	1.43795	0.715498	1.27226	-0.55676
E7EUT5	E7EUT5	Glyceraldehyde-3-phosphate dehydrogenase OS=Homo sapiens GN=GAPDH PE=3 SV=1	1.0558	0.425758	0.693027	1.39344	0.962744	1.43795	0.724862	1.26471	-0.539848
E7EUY0	E7EUY0	Uncharacterized protein OS=Homo sapiens GN=PRKDC PE=4 SV=1	0.939407	0.517668	0.574748	0.0806636	-0.297309	0.723847	0.677274	0.169067	0.508207
E7EV42	E7EV42	Uncharacterized protein OS=Homo sapiens GN=NUCB2 PE=4 SV=1		1.1268	0.807964		0.815819	1.4684	0.967384	1.14211	-0.174725
E7EV83	E7EV83	Uncharacterized protein OS=Homo sapiens GN=ACTN4 PE=4 SV=1	0.522036	0.639365	0.177191	0.843425	0.426255	1.0707	0.446197	0.780128	-0.33393
E7EV99	E7EV99	Uncharacterized protein OS=Homo sapiens GN=ADD1 PE=4 SV=1		0.520916	0.297474		0.0236494	0.402444	0.409195	0.213047	0.196148
E7EVA0	E7EVA0	Microtubule-associated protein OS=Homo sapiens GN=MAP4 PE=4 SV=1	1.11379	0.843865	0.60312	0.819385	0.961469	0.880689	0.853593	0.887181	-0.0335882
E7EVI2	E7EVI2	Uncharacterized protein OS=Homo sapiens GN=FAM82B PE=4 SV=1	0.231108	-0.244497	0.260488	0.213062	0.221533	-0.528545	0.0823661	-0.0313166	0.113683
E7EVP9	E7EVP9	Uncharacterized protein OS=Homo sapiens GN=C22orf28 PE=4 SV=1	0.373803	0.333546	0.293962	0.175782	0.194881	0.378373	0.33377	0.249679	0.0840917
E7EVS6	E7EVS6	Uncharacterized protein OS=Homo sapiens GN=ACTB PE=3 SV=1	1.11416	1.0106	1.61717	1.38207	1.85735	1.11247	1.24731	1.45063	-0.203322
E7EVU7	E7EVU7	Uncharacterized protein OS=Homo sapiens GN=GNPDA1 PE=4 SV=1	1.1731		-0.0162294	-0.376817		-0.44122	0.578434	-0.409019	0.987452
E7EVV7	E7EVV7	Uncharacterized protein OS=Homo sapiens GN=PTMA PE=4 SV=2	1.37736	0.472375	0.875779	0.390451	0.410049	0.45898	0.908506	0.419827	0.488679
E7EVY3	E7EVY3	Uncharacterized protein OS=Homo sapiens GN=CAST PE=4 SV=1	0.75673	1.49971	0.391837	0.433647	-0.0111775	0.628402	0.88276	0.350291	0.53247
E7EVZ2	E7EVZ2	Uncharacterized protein OS=Homo sapiens GN=YWHAZ PE=4 SV=1	0.313	-0.665873	0.239704	0.582556	1.28836	0.594348	-0.0377228	0.821755	-0.859478
E7EVZ4	E7EVZ4	Uncharacterized protein OS=Homo sapiens GN=SH3GL1 PE=4 SV=1	0.903509	0.443228	-0.234897	0.0434197		0.0240295	0.370613	0.0337246	0.336889
E7EW01	E7EW01	Uncharacterized protein OS=Homo sapiens GN=RPL8 PE=4 SV=1	0.313193	0.524879	-0.147073	0.100361	1.17774	-0.188894	0.230333	0.363069	-0.132736
E7EW10	E7EW10	Uncharacterized protein OS=Homo sapiens GN=TXNRD1 PE=3 SV=1	1.34236	1.00513	1.21011	1.80087	1.42084	1.41597	1.18587	1.54589	-0.360026
E7EW34	E7EW34	Uncharacterized protein OS=Homo sapiens GN=PSMD2 PE=4 SV=1	0.601316	0.335275	0.798951	0.342063	0.354624	0.823433	0.578514	0.506707	0.0718072
E7EWA5	E7EWA5	Uncharacterized protein OS=Homo sapiens GN=RAB1B PE=4 SV=1	0.502986	0.367739	0.443743	0.0467269	0.254549	-0.15422	0.438156	0.0490184	0.389138
E7EWE5	E7EWE5	Uncharacterized protein OS=Homo sapiens GN=HSD17B4 PE=3 SV=1	0.400632	0.461984	1.15352	-0.6006	-0.0694147	-1.02577	0.672044	-0.56526	1.2373
E7EWF1	E7EWF1	Uncharacterized protein OS=Homo sapiens GN=RPL4 PE=4 SV=1	0.0605258	0.274016	0.749587	-0.627728	1.12995	-0.423129	0.361376	0.0263631	0.335013
E7EWH4	E7EWH4	Uncharacterized protein OS=Homo sapiens GN=AK2 PE=3 SV=1	0.486169	0.548078	1.03415	-0.919626	-0.679837	-0.290777	0.689466	-0.63008	1.31955
E7EWI9	E7EWI9	Uncharacterized protein OS=Homo sapiens GN=HNRNPA3 PE=4 SV=1	-0.195011	-0.0797791	0.283992	0.468934	0.836598	0.378327	0.00306729	0.561287	-0.558219
E7EWK8	E7EWK8	Uncharacterized protein OS=Homo sapiens GN=PLOD1 PE=4 SV=2	0.0904815	0.00454146	0.678216	0.364472	0.879856	0.76232	0.257746	0.668883	-0.411136
E7EWR1	E7EWR1	Uncharacterized protein OS=Homo sapiens GN=TUBB PE=3 SV=1	1.20854	0.646674	0.447063	1.03938	0.157522	1.09179	0.767426	0.762896	0.00452921
E7EWU2	E7EWU2	Uncharacterized protein OS=Homo sapiens GN=FLNA PE=4 SV=1	2.1129	1.12762	0.977795	1.7738	-0.0603664	2.0187	1.40611	1.24405	0.162061
E7EWW2	E7EWW2	Uncharacterized protein OS=Homo sapiens GN=CCT5 PE=3 SV=2	0.769648	0.43174	0.211286	-0.499809	-0.449598	0.494376	0.470891	-0.151677	0.622568
E7EWZ6	E7EWZ6	Uncharacterized protein OS=Homo sapiens GN=ITGAV PE=3 SV=1	0.359329	0.293833	0.321715	1.39788	0.979288	2.53441	0.324959	1.63719	-1.31223
E7EX17	E7EX17	Uncharacterized protein OS=Homo sapiens GN=EIF4B PE=4 SV=1	0.853459	0.797009	0.303784	0.833522	0.759011	0.583263	0.651418	0.725265	-0.0738477
E7EX24	E7EX24	Uncharacterized protein OS=Homo sapiens GN=YWHAZ PE=4 SV=1	1.44788	1.05329	1.07607	1.65255	0.459928	1.77915	1.19241	1.29721	-0.1048
E7EX29	E7EX29	Uncharacterized protein OS=Homo sapiens GN=YWHAZ PE=3 SV=1	1.40406	0.906166	0.951739	1.68504	0.930078	1.88913	1.08732	1.50141	-0.414094
E7EX44	E7EX44	Uncharacterized protein OS=Homo sapiens GN=CALD1 PE=4 SV=1	0.45293	0.23604	0.30538	0.84425	1.34388	0.584854	0.33145	0.924328	-0.592879
E7EX69	E7EX69	Uncharacterized protein OS=Homo sapiens GN=TUBB2B PE=3 SV=2	1.20888	0.646336	0.447063	0.6229	0.191658	1.08577	0.767426	0.633443	0.133983
E7EX81	E7EX81	Uncharacterized protein OS=Homo sapiens GN=NCL PE=4 SV=1	0.448194	1.24391	0.752136	0.661918	1.19657	0.700085	0.814748	0.852858	-0.0381098
E7EXB4	E7EXB4	Uncharacterized protein OS=Homo sapiens GN=HSPD1 PE=3 SV=1	1.64092	1.45403	1.91115	0.958991	0.265817	0.90569	1.6687	0.710166	0.958534
E9PAQ6	E9PAQ6	Uncharacterized protein OS=Homo sapiens GN=CCT3 PE=3 SV=1	0.897301	0.53198	0.547453	-0.296112	0.219834	-0.124978	0.658911	-0.0670855	0.725997
E9PAV2	E9PAV2	Uncharacterized protein OS=Homo sapiens GN=PSMB5 PE=3 SV=1	-0.0035209	-0.407266	-0.272883	0.651854	0.835778	0.422302	-0.22789	0.636645	-0.864535
E9PAV3	E9PAV3	Uncharacterized protein OS=Homo sapiens GN=NACA PE=4 SV=1	0.919043	0.805276	0.0838561	0.129604	-0.0213245	0.243653	0.602725	0.117311	0.485414
E9PB82	E9PB82	Uncharacterized protein OS=Homo sapiens GN=HSD17B4 PE=3 SV=1	0.400632	0.461984	1.15352	-0.6006	-0.0694147	-1.02577	0.672044	-0.56526	1.2373
E9PBB7	E9PBB7	Uncharacterized protein OS=Homo sapiens GN=STX12 PE=3 SV=1	0.0560054	-0.108496	-0.321851	0.100353	0.136695	-0.206539	-0.12478	0.0101697	-0.13495
E9PBC8	E9PBC8	Uncharacterized protein OS=Homo sapiens GN=PSMA7 PE=4 SV=1	0.796351	0.416462	0.28176	0.527354	-0.163955	0.548667	0.498191	0.304022	0.194169
E9PBF5	E9PBF5	Uncharacterized protein OS=Homo sapiens GN=PDLIM5 PE=4 SV=1	0.569008	-0.0126123	0.391339	0.413791	1.37513	0.560474	0.315912	0.783133	-0.467221
E9PBF6	E9PBF6	Uncharacterized protein OS=Homo sapiens GN=LMNB1 PE=3 SV=1	-0.162635	0.171991	0.582938	0.851522	1.583	0.87385	0.197431	1.10279	-0.905359
E9PBF7	E9PBF7	Uncharacterized protein OS=Homo sapiens GN=NEFM PE=3 SV=1	0.165781	0.497376	1.23171	-0.128596	0.603128	0.423025	0.631624	0.299186	0.332438
E9PBG7	E9PBG7	Uncharacterized protein OS=Homo sapiens GN=CAMK2D PE=4 SV=1	0.00221987	0.907341	0.878101	-0.0809043	-0.492182	0.775276	0.595887	0.0673964	0.528491
E9PBJ4	E9PBJ4	Uncharacterized protein OS=Homo sapiens GN=TUBB PE=3 SV=1	1.43207	1.29714	1.29742	1.54682	0.833878	1.61103	1.34221	1.33058	0.0116322
E9PBJ5	E9PBJ5	Uncharacterized protein OS=Homo sapiens GN=SDHA PE=4 SV=1	-0.0242904	0.392299	0.773686	0.379823	0.755385	-0.521644	0.380565	0.204521	0.176044
E9PBM1	E9PBM1	Uncharacterized protein OS=Homo sapiens GN=OGDH PE=4 SV=1	0.374923	0.811056	0.826269	0.136384	0.17184	0.351454	0.670749	0.219893	0.450857
E9PBN5	E9PBN5	Uncharacterized protein OS=Homo sapiens GN=DDAH2 PE=4 SV=1	0.0965306	-1.75522	-0.177464	0.323589	-1.88423	0.0608019	-0.612052	-0.499947	-0.112106
E9PBP5	E9PBP5	Uncharacterized protein OS=Homo sapiens GN=AKR1C4 PE=4 SV=1	1.44993	0.65837	0.593221	-0.0471347	-0.586133	-0.979255	0.900506	-0.537507	1.43801
E9PBQ9	E9PBQ9	Uncharacterized protein OS=Homo sapiens GN=EEF1D PE=3 SV=1	0.43469	0.643396	0.408669	0.420758	1.17147	-0.290346	0.495585	0.43396	0.0616245
E9PBT8	E9PBT8	Uncharacterized protein OS=Homo sapiens GN=SUMF2 PE=4 SV=1	0.554292		0.528946	0.506341		0.0058825	0.541619	0.256112	0.285507
E9PBU3	E9PBU3	Uncharacterized protein OS=Homo sapiens GN=ATIC PE=4 SV=1	1.47541	0.783137	-0.000452297	0.858844	0.356071	0.945369	0.752698	0.720095	0.0326034
E9PBV3	E9PBV3	Uncharacterized protein OS=Homo sapiens GN=SBSN PE=4 SV=1	-0.762014	-1.22588	2.16253	1.56688	0.373916	-1.62269	0.0582105	0.106033	-0.047823
E9PC09	E9PC09	Uncharacterized protein OS=Homo sapiens GN=NCSTN PE=4 SV=1	0.245261	0.475296	0.99708	0.311383	0.129589	1.74381	0.572546	0.728262	-0.155716
E9PC82	E9PC82	Uncharacterized protein OS=Homo sapiens GN=TAGLN PE=4 SV=1	1.24383	0.0986303	0.192752	1.47295	0.377022	1.4433	0.511737	1.09776	-0.586021
E9PCA1	E9PCA1	Uncharacterized protein OS=Homo sapiens GN=CCT5 PE=3 SV=1	0.769648	0.43174	0.211286	-0.499809	-0.449598	0.494376	0.470891	-0.151677	0.622568
E9PCB3	E9PCB3	Uncharacterized protein OS=Homo sapiens GN=CTSB PE=4 SV=2	-1.87872	-0.579738	0.28942	-0.193133	1.59371	-0.536227	-0.723011	0.288115	-1.01113
E9PCB6	E9PCB6	Uncharacterized protein OS=Homo sapiens GN=NLN PE=3 SV=1	0.654892	0.168597	0.187805	0.433683	-0.639638	-0.215035	0.337098	-0.14033	0.477428
E9PCD7	E9PCD7	Uncharacterized protein OS=Homo sapiens GN=MAN2B2 PE=4 SV=1	-0.0533822	1.12471	0.0470353	0.161899	0.641601	0.0998039	0.372787	0.301102	0.0716853
E9PCH5	E9PCH5	Uncharacterized protein OS=Homo sapiens GN=CAST PE=4 SV=1	0.75673	1.49971	0.391837	0.433647	-0.0111775	0.628402	0.88276	0.350291	0.53247
E9PCI1	E9PCI1	Uncharacterized protein OS=Homo sapiens GN=ACP2 PE=4 SV=1	-0.062223	0.513266	0.871888	0.675061	0.491986	0.98546	0.440977	0.717502	-0.276525
E9PCI5	E9PCI5	Uncharacterized protein OS=Homo sapiens GN=HSPB6 PE=3 SV=2	1.18946	0.798054	1.00321	0.144283	0.657168	-0.184793	0.996907	0.205553	0.791354
E9PCK0	E9PCK0	Uncharacterized protein OS=Homo sapiens GN=HK1 PE=3 SV=1	0.63312	0.801409	0.926855	0.576021	0.65786	0.991478	0.787128	0.741787	0.0453417
E9PCP0	E9PCP0	Uncharacterized protein OS=Homo sapiens GN=GNB3 PE=4 SV=2		1.81899	1.54969		2.49401	1.06652	1.68434	1.78027	-0.0959289
E9PCR7	E9PCR7	Uncharacterized protein OS=Homo sapiens GN=OGDH PE=4 SV=1	0.374923	0.811056	0.826269	0.136384	0.17184	0.351454	0.670749	0.219893	0.450857
E9PCW3	E9PCW3	Uncharacterized protein OS=Homo sapiens GN=C22orf28 PE=4 SV=1	0.373803	0.333546	0.570191	0.175782	0.194881	0.195194	0.425847	0.188619	0.237227
E9PCY7	E9PCY7	Uncharacterized protein OS=Homo sapiens GN=HNRNPH1 PE=4 SV=1	0.21634	0.748956	0.333583	0.214538	0.608006	0.291054	0.43296	0.3712	0.0617603
E9PD14	E9PD14	Uncharacterized protein OS=Homo sapiens GN=GNB2L1 PE=4 SV=1	1.22735	1.00761	0.00336466	0.675996	0.827674	0.419356	0.746107	0.641009	0.105098
E9PD24	E9PD24	Uncharacterized protein OS=Homo sapiens GN=YWHAZ PE=4 SV=1	0.313	-0.665873	0.239704	0.582556	1.28836	0.594348	-0.0377228	0.821755	-0.859478
E9PD68	E9PD68	Uncharacterized protein OS=Homo sapiens GN=CRMP1 PE=4 SV=1	0.821946	0.173771	-0.0171832	0.511174	1.05854	0.430239	0.326178	0.666651	-0.340473
E9PD92	E9PD92	Glucose-6-phosphate 1-dehydrogenase OS=Homo sapiens GN=G6PD PE=3 SV=1	1.62225	0.909343	0.0532291	0.256401	-0.36679	0.451927	0.861608	0.113846	0.747762
E9PDB2	E9PDB2	Uncharacterized protein OS=Homo sapiens GN=MDH2 PE=3 SV=1	0.474829	0.737451	1.01299	0.260901	0.568187	0.0812868	0.741756	0.303458	0.438298
E9PDE4	E9PDE4	Uncharacterized protein OS=Homo sapiens GN=CAST PE=4 SV=1	0.75673	1.49971	0.391837	0.433647	-0.0111775	0.628402	0.88276	0.350291	0.53247
E9PDF2	E9PDF2	Uncharacterized protein OS=Homo sapiens GN=OGDH PE=4 SV=1	0.374923	0.811056	0.826269	0.136384	0.17184	0.351454	0.670749	0.219893	0.450857
E9PDJ9	E9PDJ9	Uncharacterized protein OS=Homo sapiens GN=LIMCH1 PE=4 SV=1	0.25692	0.295885	0.0908764	0.718864	1.25592	0.43104	0.21456	0.801941	-0.58738
E9PDQ8	E9PDQ8	Uncharacterized protein OS=Homo sapiens GN=SUCLG2 PE=4 SV=1	1.77145	1.15239	1.41049	1.44266	0.443051	0.666259	1.44478	0.850658	0.594121
E9PDS0	E9PDS0	Uncharacterized protein OS=Homo sapiens GN=ASAH1 PE=4 SV=1	0.229375	0.970145	1.65975	0.982259	0.890035	1.63052	0.953089	1.16761	-0.214517
E9PDU6	E9PDU6	Uncharacterized protein OS=Homo sapiens GN=CNN3 PE=4 SV=1	1.04432	-0.150426	0.29077	0.830988	0.752346	0.309907	0.394889	0.63108	-0.236191
E9PDV8	E9PDV8	Glucose-6-phosphate 1-dehydrogenase OS=Homo sapiens GN=G6PD PE=3 SV=1	1.57689	1.23341	0.196727	0.256401	-0.596775	0.497287	1.00234	0.0523044	0.950037
E9PE77	E9PE77	Uncharacterized protein OS=Homo sapiens GN=FN1 PE=4 SV=1	-0.0923144	-0.295907	0.173829	0.00398594	0.580697	0.590271	-0.0714642	0.391651	-0.463115
E9PED3	E9PED3	Uncharacterized protein OS=Homo sapiens GN=RAI14 PE=4 SV=1	-0.293698	0.11541	0.282329	0.241858	0.464326	-0.186189	0.0346804	0.173332	-0.138651
E9PEF8	E9PEF8	Uncharacterized protein OS=Homo sapiens GN=SDHA PE=4 SV=2	-0.0414007	0.271846	0.773686	0.313401	0.894717	-0.478662	0.33471	0.243152	0.0915587
E9PEM2	E9PEM2	Uncharacterized protein OS=Homo sapiens GN=SYNPO2 PE=4 SV=1	-0.0677387	0.157308	0.0111104	0.73791	0.631457	0.228067	0.0335598	0.532478	-0.498918
E9PEN3	E9PEN3	Uncharacterized protein OS=Homo sapiens GN=PRDX4 PE=4 SV=1	1.50643	-0.216197	0.370311	1.485	-0.587473	0.102392	0.553514	0.333305	0.220208
E9PEX3	E9PEX3	Uncharacterized protein OS=Homo sapiens GN=HSP90B1 PE=4 SV=1	0.992617	1.13477	1.28231	1.10105	1.04559	1.29384	1.13657	1.14683	-0.0102647
E9PEX5	E9PEX5	Uncharacterized protein OS=Homo sapiens GN=PSMD4 PE=4 SV=1	0.851469	0.510937	0.473075	0.667845	0.428427	0.083779	0.611827	0.39335	0.218477
E9PEX6	E9PEX6	Uncharacterized protein OS=Homo sapiens GN=DLD PE=4 SV=1	1.51533	0.513323	0.950506		0.231768	-0.253743	0.993054	-0.0109878	1.00404
E9PF17	E9PF17	Uncharacterized protein OS=Homo sapiens GN=VCAN PE=4 SV=2	-0.289717	0.433556	0.912141	0.479435	0.335541	0.818619	0.351993	0.544532	-0.192538
E9PF41	E9PF41	Uncharacterized protein OS=Homo sapiens GN=ACTR2 PE=3 SV=1	0.433298	-0.20104	-0.450736	0.169753	0.117442	0.0470862	-0.0728258	0.111427	-0.184253
E9PF55	E9PF55	Uncharacterized protein OS=Homo sapiens GN=TNS1 PE=4 SV=1	-0.656862	0.780747	0.793033	0.146237	1.42935	0.213705	0.305639	0.596432	-0.290792
E9PF79	E9PF79	Pyruvate kinase OS=Homo sapiens GN=PKM2 PE=3 SV=1	1.44572	0.583596	0.466053	1.22414	0.415763	1.49369	0.831788	1.04453	-0.212744
E9PF80	E9PF80	Uncharacterized protein OS=Homo sapiens GN=VAT1 PE=4 SV=1	0.280147	0.461962	0.489806	0.188825	-0.690687	0.668039	0.410638	0.0553925	0.355246
E9PF82	E9PF82	Uncharacterized protein OS=Homo sapiens GN=CAMK2D PE=4 SV=1	0.00221987	0.907341	0.878101	-0.0809043	-0.492182	0.775276	0.595887	0.0673964	0.528491
E9PFF2	E9PFF2	Uncharacterized protein OS=Homo sapiens GN=TKT PE=4 SV=1	4.46138	4.05801	3.13569	4.27187	4.70456	3.88361	3.88503	4.28668	-0.401653
E9PFG7	E9PFG7	Uncharacterized protein OS=Homo sapiens GN=OGDH PE=4 SV=1	0.38003	0.811056	0.760861	0.239508	0.17184	-0.110341	0.650649	0.100336	0.550313
E9PFL7	E9PFL7	Uncharacterized protein OS=Homo sapiens GN=GDI2 PE=4 SV=1	0.672569	1.1235	0.448414	0.467439	0.416527	0.458336	0.748162	0.447434	0.300728
E9PFN5	E9PFN5	Uncharacterized protein OS=Homo sapiens GN=GSTK1 PE=4 SV=1	0.556532	0.806785	0.897684	-0.81241	-1.05332	-0.245587	0.753667	-0.703771	1.45744
E9PFT9	E9PFT9	Uncharacterized protein OS=Homo sapiens GN=TMEM119 PE=4 SV=2	0.40023	0.400433	0.612896	0.575459	0.00522063	0.385028	0.471186	0.321902	0.149284
E9PFW2	E9PFW2	Uncharacterized protein OS=Homo sapiens GN=MANBA PE=4 SV=1	0.221579	0.436274	0.519326	0.400037	-0.0209082	0.714381	0.392393	0.364503	0.0278898
E9PFW4	E9PFW4	Uncharacterized protein OS=Homo sapiens GN=COMP PE=4 SV=2	0.43574	0.409553	0.771191	0.377286	0.565318	0.436839	0.538828	0.459814	0.0790132
E9PFZ5	E9PFZ5	Uncharacterized protein OS=Homo sapiens GN=PTK7 PE=4 SV=1	0.101443	0.0166308	0.208614	0.580328	0.0476196	0.38352	0.108896	0.337156	-0.22826
E9PG15	E9PG15	Uncharacterized protein OS=Homo sapiens GN=YWHAQ PE=4 SV=1	1.58597		0.16915	0.867673		0.174862	0.877559	0.521268	0.356292
E9PG30	E9PG30	Uncharacterized protein OS=Homo sapiens GN=ACTG2 PE=3 SV=1	3.10607	2.94996	3.50324	3.65962	4.75386	3.61273	3.18642	4.00873	-0.822312
E9PGE6	E9PGE6	Uncharacterized protein OS=Homo sapiens GN=ATP6V1H PE=4 SV=1	-0.069181	0.129331	0.213543	-0.143284	0.443222	0.187333	0.0912311	0.162424	-0.0711927
E9PGF5	E9PGF5	Uncharacterized protein OS=Homo sapiens GN=TNS1 PE=4 SV=1	-0.656862	0.780747	0.793033	0.146237	1.42935	0.213705	0.305639	0.596432	-0.290792
E9PGK1	E9PGK1	Uncharacterized protein OS=Homo sapiens GN=ANXA6 PE=3 SV=1	2.69018	1.8303	1.46615	2.51237	2.02609	1.84454	1.99554	2.12767	-0.132126
E9PGK3	E9PGK3	Uncharacterized protein OS=Homo sapiens GN=TUBA1C PE=4 SV=1	1.25932	0.731423	0.14578	0.604687	-0.777603	0.753967	0.712176	0.193684	0.518492
E9PGL4	E9PGL4	Uncharacterized protein OS=Homo sapiens GN=HEXA PE=4 SV=2	0.288387	1.00095	0.327412	0.564522	1.05461	0.10343	0.538918	0.574186	-0.0352686
E9PGL6	E9PGL6	Uncharacterized protein OS=Homo sapiens GN=EFEMP1 PE=4 SV=2	0.434902	0.472644	0.570459	0.922867	0.813073	0.765366	0.492668	0.833769	-0.341101
E9PGM4	E9PGM4	Uncharacterized protein OS=Homo sapiens GN=GBE1 PE=4 SV=1	1.07315	0.358702	0.26832	0.35634	-0.35417	0.764563	0.566723	0.255578	0.311145
E9PGM5	E9PGM5	Microtubule-associated protein OS=Homo sapiens GN=MAP4 PE=4 SV=1	0.577926	0.101309	0.327272	0.17598	1.08101	-0.0174395	0.335502	0.413182	-0.0776797
E9PGZ0	E9PGZ0	Uncharacterized protein OS=Homo sapiens GN=CSDE1 PE=4 SV=1	0.997368	2.06389	0.939419	-0.142525	0.751729	1.68972	1.33356	0.766308	0.567251
E9PGZ1	E9PGZ1	Uncharacterized protein OS=Homo sapiens GN=CALD1 PE=4 SV=1	0.495039	0.23604	0.345496	0.84538	1.33037	0.589334	0.358858	0.921695	-0.562837
E9PH29	E9PH29	Uncharacterized protein OS=Homo sapiens GN=PRDX3 PE=4 SV=1	0.60561	0.66283	1.44753	1.18676	0.920456	1.40761	0.905324	1.17161	-0.266287
E9PH51	E9PH51	L-lactate dehydrogenase OS=Homo sapiens GN=LDHA PE=3 SV=2	1.66411	0.565485	0.538297	1.38734	1.08992	0.665126	0.922631	1.04746	-0.124832
E9PHF0	E9PHF0	Uncharacterized protein OS=Homo sapiens GN=FLNA PE=4 SV=2	1.84283	1.03403	1.15275	1.85984	-0.0603664	2.0187	1.3432	1.27273	0.0704774
E9PHH7	E9PHH7	Uncharacterized protein OS=Homo sapiens GN=HSP90AB1 PE=4 SV=1	0.940195	1.05885	-0.194907	0.379961	-0.354998	0.288923	0.60138	0.104629	0.496751
E9PHI1	E9PHI1	Uncharacterized protein OS=Homo sapiens GN=HSP90AB1 PE=4 SV=1	0.779828	0.829521	0.0861122	0.179585	-0.288787	0.124372	0.565154	0.00505682	0.560097
E9PHI2	E9PHI2	Uncharacterized protein OS=Homo sapiens GN=HSP90AB1 PE=4 SV=1	0.940195	1.05885	0.0861122	0.379961	-0.354998	0.124372	0.695053	0.0497787	0.645274
E9PHL5	E9PHL5	Uncharacterized protein OS=Homo sapiens GN=MVP PE=4 SV=2	0.763662	0.812124	0.26728	0.68048	0.261097	0.664553	0.614355	0.535377	0.0789785
E9PHM7	E9PHM7	Uncharacterized protein OS=Homo sapiens GN=LIMCH1 PE=4 SV=1	0.25692	0.295885	0.0394506	0.718864	1.25592	0.509506	0.197419	0.828096	-0.630678
E9PHR5	E9PHR5	Uncharacterized protein OS=Homo sapiens GN=SEC13 PE=4 SV=1	0.900619	0.919173	-0.0529985	0.34519	0.959324	0.438914	0.588931	0.581143	0.0077888
E9PHT9	E9PHT9	Uncharacterized protein OS=Homo sapiens GN=ANXA5 PE=3 SV=1	1.39304	0.736531	0.964202	1.49685	1.12988	0.686702	1.03126	1.10448	-0.0732188
E9PHY0	E9PHY0	Uncharacterized protein OS=Homo sapiens GN=ACP2 PE=4 SV=1	-0.062223	0.513266	0.871888	0.675061	0.491986	0.98546	0.440977	0.717502	-0.276525
E9PHZ5	E9PHZ5	Uncharacterized protein OS=Homo sapiens GN=CTSB PE=4 SV=1	-1.57566	-0.579738	0.28942	-0.496185	1.59371	1.24253	-0.621994	0.780016	-1.40201
E9PI39	E9PI39	Uncharacterized protein OS=Homo sapiens GN=EEF1D PE=4 SV=1	0.351218	0.967559	0.515368	0.3215	1.38771	0.241565	0.611382	0.650259	-0.0388777
E9PI65	E9PI65	Uncharacterized protein OS=Homo sapiens GN=HSPA8 PE=3 SV=1	1.64855	1.39875	1.56097	1.76206	1.93985	1.87724	1.53609	1.85972	-0.323624
E9PIE3	E9PIE3	Uncharacterized protein OS=Homo sapiens GN=PRKCDBP PE=4 SV=1	-0.0188223	0.440933	0.649209	0.375693	1.17833	0.436361	0.357107	0.66346	-0.306354
E9PIG2	E9PIG2	Uncharacterized protein OS=Homo sapiens GN=SERPINH1 PE=4 SV=1	1.42858	0.458771	4.87528	2.22932	-0.568903	5.54883	2.25421	2.40308	-0.14887
E9PIG4	E9PIG4	Uncharacterized protein OS=Homo sapiens GN=PRCP PE=4 SV=1	0.558283		0.588213	0.301114		0.12982	0.573248	0.215467	0.357781
E9PIM6	E9PIM6	Uncharacterized protein OS=Homo sapiens GN=THY1 PE=4 SV=1	0.500048	0.713092	1.04337	0.798878	1.69722	1.14904	0.752168	1.21504	-0.462876
E9PIR7	E9PIR7	Uncharacterized protein OS=Homo sapiens GN=TXNRD1 PE=3 SV=1	1.34236	1.00513	1.21011	1.80087	1.42084	1.41597	1.18587	1.54589	-0.360026
E9PIX6	E9PIX6	Uncharacterized protein OS=Homo sapiens GN=PRMT1 PE=4 SV=1	0.49041	0.84315	0.398966	0.306849	0.0353977	0.505191	0.577509	0.282479	0.29503
E9PIZ1	E9PIZ1	Uncharacterized protein OS=Homo sapiens GN=EEF1D PE=4 SV=1	0.340558	0.952806	0.47399	0.294903	1.36341	0.259205	0.589118	0.639173	-0.0500546
E9PIZ3	E9PIZ3	Uncharacterized protein OS=Homo sapiens GN=RPL8 PE=4 SV=1	0.552115	0.678275	0.332119	0.151222	1.45279	-0.04528	0.520836	0.519577	0.00125886
E9PIZ5	E9PIZ5	Uncharacterized protein OS=Homo sapiens GN=TXNRD1 PE=4 SV=1	0.550721	0.113488	0.744251	1.66473	1.16064	1.35562	0.469487	1.39366	-0.924176
E9PJ10	E9PJ10	Uncharacterized protein OS=Homo sapiens GN=LMO7 PE=4 SV=1	-0.296583	-0.22984	-0.133952	0.251034	1.58755	0.249658	-0.220125	0.69608	-0.916205
E9PJ21	E9PJ21	Uncharacterized protein OS=Homo sapiens GN=HYOU1 PE=3 SV=1		1.0019	0.726375		0.0796568	2.15897	0.864139	1.11931	-0.255175
E9PJ32	E9PJ32	Uncharacterized protein OS=Homo sapiens GN=TAGLN PE=4 SV=1	0.149213	-0.235278	0.181119	1.12535	0.621201	1.71788	0.0316845	1.15481	-1.12312
E9PJ67	E9PJ67	Uncharacterized protein OS=Homo sapiens GN=CTSB PE=4 SV=1	-1.87872	-0.579738	0.28942	-0.193133	1.59371	-0.536227	-0.723011	0.288115	-1.01113
E9PJD5	E9PJD5	Uncharacterized protein OS=Homo sapiens GN=RCN1 PE=4 SV=1	0.678318	0.356074	0.322753	0.773905	-0.195211	-0.0322349	0.452382	0.182153	0.270229
E9PJF7	E9PJF7	Uncharacterized protein OS=Homo sapiens GN=TPT1 PE=4 SV=1	0.585097		-0.277285	-0.447629		-0.252296	0.153906	-0.349963	0.503869
E9PJH8	E9PJH8	Uncharacterized protein OS=Homo sapiens GN=SERPINH1 PE=4 SV=1	1.42858	0.458771	4.87528	2.22932	-0.568903	5.54883	2.25421	2.40308	-0.14887
E9PJL7	E9PJL7	Uncharacterized protein OS=Homo sapiens GN=CRYAB PE=3 SV=1	1.73073	0.471408	0.580409	-0.570487	-0.322109	-0.248479	0.927516	-0.380358	1.30787
E9PK01	E9PK01	Uncharacterized protein OS=Homo sapiens GN=EEF1D PE=3 SV=1	0.351218	0.967559	0.515368	0.3215	1.38771	0.241565	0.611382	0.650259	-0.0388777
E9PK06	E9PK06	Uncharacterized protein OS=Homo sapiens GN=EEF1D PE=4 SV=1	0.43469	0.643396	0.408669	0.420758	1.17147	-0.290346	0.495585	0.43396	0.0616245
E9PK25	E9PK25	Uncharacterized protein OS=Homo sapiens GN=CFL1 PE=4 SV=1	1.6269	0.600504	0.738449	1.73354	0.894291	1.46908	0.988617	1.36564	-0.37702
E9PK47	E9PK47	Phosphorylase OS=Homo sapiens GN=PYGL PE=3 SV=1	1.47794	-1.18547	-0.370948	0.0425603	-1.87357	0.185885	-0.0261572	-0.548375	0.522217
E9PK54	E9PK54	Uncharacterized protein OS=Homo sapiens GN=HSPA8 PE=3 SV=1	1.06205	0.59218	0.968913	1.08112	1.39774	1.34965	0.87438	1.27617	-0.401791
E9PK58	E9PK58	Uncharacterized protein OS=Homo sapiens GN=LMO7 PE=4 SV=1	-0.296583	-0.22984	-0.133952	0.251034	1.58755	0.249658	-0.220125	0.69608	-0.916205
E9PK86	E9PK86	Uncharacterized protein OS=Homo sapiens GN=SERPINH1 PE=3 SV=1	1.42858	0.881151	3.81844	2.22932	-0.300331	4.03965	2.04272	1.98954	0.053178
E9PKD0	E9PKD0	Uncharacterized protein OS=Homo sapiens GN=CTSB PE=4 SV=1	-1.87872	-0.579738	0.28942	-0.193133	1.59371	-0.536227	-0.723011	0.288115	-1.01113
E9PKD3	E9PKD3	Uncharacterized protein OS=Homo sapiens GN=TXNRD1 PE=4 SV=1	0.862635	0.298612	0.744251	1.2591	1.16064	1.15158	0.635166	1.19044	-0.555271
E9PKE3	E9PKE3	Uncharacterized protein OS=Homo sapiens GN=HSPA8 PE=3 SV=1	1.86175	1.39875	1.46351	1.69779	1.85008	1.9217	1.57467	1.82319	-0.248518
E9PKG1	E9PKG1	Uncharacterized protein OS=Homo sapiens GN=PRMT1 PE=4 SV=1	0.49041	0.34837	0.32036	0.306849	0.36464	0.485857	0.38638	0.385782	0.000598118
E9PKG3	E9PKG3	Uncharacterized protein OS=Homo sapiens GN=CTTN PE=4 SV=1	0.436644	-0.0878745	0.541971	0.208206	0.174013	0.283624	0.296914	0.221948	0.0749657
E9PKG6	E9PKG6	Uncharacterized protein OS=Homo sapiens GN=NUCB2 PE=4 SV=1		1.1268	0.807964	0.698205	0.815819	1.17236	0.967384	0.895461	0.0719226
E9PKH2	E9PKH2	Uncharacterized protein OS=Homo sapiens GN=SERPINH1 PE=3 SV=1	0.680933	0.507336	0.518584	0.134003	0.239034	0.312397	0.568951	0.228478	0.340473
E9PKI4	E9PKI4	Uncharacterized protein OS=Homo sapiens GN=TXNRD1 PE=4 SV=1	0.585323	0.106539	0.7512	1.59261	1.23105	1.49799	0.481021	1.44055	-0.959528
E9PKK7	E9PKK7	Uncharacterized protein OS=Homo sapiens GN=C14orf149 PE=4 SV=1	0.735843	-0.303536	-0.624249	0.511459	0.0384087	0.253281	-0.0639808	0.267716	-0.331697
E9PKN6	E9PKN6	Uncharacterized protein OS=Homo sapiens GN=PRCP PE=4 SV=1	0.558283		0.588213	0.301114		0.12982	0.573248	0.215467	0.357781
E9PKQ7	E9PKQ7	Uncharacterized protein OS=Homo sapiens GN=CTSB PE=4 SV=1	-1.57566	-0.579738	0.28942	-0.496185	1.59371	1.24253	-0.621994	0.780016	-1.40201
E9PKU7	E9PKU7	Uncharacterized protein OS=Homo sapiens GN=GANAB PE=4 SV=1	-0.174035	0.0963924	0.642217	0.716673	0.683624	0.148561	0.188192	0.516286	-0.328094
E9PKW9	E9PKW9	Uncharacterized protein OS=Homo sapiens GN=ACP2 PE=4 SV=1	-0.062223	0.513266	0.871888	0.675061	0.491986	0.98546	0.440977	0.717502	-0.276525
E9PKZ0	E9PKZ0	Uncharacterized protein OS=Homo sapiens GN=RPL8 PE=4 SV=1	0.552115	0.678275	0.332119	0.151222	1.45279	-0.04528	0.520836	0.519577	0.00125886
E9PL12	E9PL12	Uncharacterized protein OS=Homo sapiens GN=EEF1D PE=4 SV=1	0.351218	0.967559	0.515368	0.3215	1.38771	0.241565	0.611382	0.650259	-0.0388777
E9PL22	E9PL22	Uncharacterized protein OS=Homo sapiens GN=HYOU1 PE=3 SV=1	0.682767	1.0019	1.11816	0.728239	0.0796568	2.15897	0.934277	0.988956	-0.0546793
E9PL71	E9PL71	Uncharacterized protein OS=Homo sapiens GN=EEF1D PE=4 SV=1	0.451657	0.982312	0.466604	0.431935	1.41202	0.084206	0.633524	0.642719	-0.00919434
E9PL85	E9PL85	Uncharacterized protein OS=Homo sapiens GN=PRCP PE=4 SV=1	0.558283		0.588213	0.301114		0.12982	0.573248	0.215467	0.357781
E9PLA2	E9PLA2	Uncharacterized protein OS=Homo sapiens GN=RHOC PE=4 SV=1		0.431156	0.76432		4.08534	-0.107361	0.597738	1.98899	-1.39125
E9PLD0	E9PLD0	Uncharacterized protein OS=Homo sapiens GN=RAB1B PE=3 SV=1	0.728021	0.8424	0.808901	0.35396	0.253947	0.88465	0.793107	0.497519	0.295588
E9PLF4	E9PLF4	Uncharacterized protein OS=Homo sapiens GN=HSPA8 PE=3 SV=1	1.06205	0.59218	0.968913	1.08112	1.39774	1.34965	0.87438	1.27617	-0.401791
E9PLH4	E9PLH4	Uncharacterized protein OS=Homo sapiens GN=LMO7 PE=4 SV=1	-0.0728365	-0.22984	0.209114	0.735631	1.58755	1.45451	-0.0311875	1.25923	-1.29042
E9PLJ3	E9PLJ3	Uncharacterized protein OS=Homo sapiens GN=CFL1 PE=4 SV=1	1.6269	0.600504	0.197195	1.65789	1.25302	1.52903	0.808199	1.47998	-0.671781
E9PLK3	E9PLK3	Uncharacterized protein OS=Homo sapiens GN=NPEPPS PE=4 SV=1	0.578716	0.726568	0.423572	1.40155	0.398363	1.88709	0.576286	1.229	-0.652715
E9PLT1	E9PLT1	Uncharacterized protein OS=Homo sapiens GN=CD36 PE=4 SV=1	0.267775	0.535525	2.19092	0.229551	0.617606	1.98723	0.998073	0.944795	0.0532781
E9PLT3	E9PLT3	Uncharacterized protein OS=Homo sapiens GN=TXNRD1 PE=4 SV=1	0.585323	0.106539	0.7512	1.59261	1.23105	1.49799	0.481021	1.44055	-0.959528
E9PLU6	E9PLU6	Uncharacterized protein OS=Homo sapiens GN=LMO7 PE=4 SV=1	-0.296583	-0.22984	-0.133952	0.251034	1.58755	0.249658	-0.220125	0.69608	-0.916205
E9PLY3	E9PLY3	Uncharacterized protein OS=Homo sapiens GN=CTSB PE=4 SV=1	-1.57566	-0.579738	0.28942	-0.496185	1.59371	1.24253	-0.621994	0.780016	-1.40201
E9PLZ1	E9PLZ1	Uncharacterized protein OS=Homo sapiens GN=AHNAK PE=4 SV=1	-0.35551	0.108827	0.383727	0.0821426	1.48079	0.281417	0.0456817	0.614782	-0.5691
E9PM13	E9PM13	Uncharacterized protein OS=Homo sapiens GN=HSPA8 PE=3 SV=1	0.570963	-0.0914982	0.0595597	0.108645	0.79854	0.568829	0.179675	0.492005	-0.31233
E9PM69	E9PM69	Uncharacterized protein OS=Homo sapiens GN=PSMC3 PE=3 SV=1	0.7093	0.39617	0.0612991	0.129708	-0.610388	0.542702	0.388923	0.020674	0.368249
E9PMI5	E9PMI5	Uncharacterized protein OS=Homo sapiens GN=SERPINH1 PE=3 SV=1	1.42858	0.881151	3.81844	2.22932	-0.300331	4.03965	2.04272	1.98954	0.053178
E9PMP7	E9PMP7	Uncharacterized protein OS=Homo sapiens GN=LMO7 PE=4 SV=1	0.0746942	-0.22984	0.466709	0.834589	1.58755	1.25486	0.103854	1.22567	-1.12181
E9PMS6	E9PMS6	Uncharacterized protein OS=Homo sapiens GN=LMO7 PE=4 SV=1	0.00901609	-0.22984	0.236335	0.817484	1.58755	1.36188	0.00517047	1.25564	-1.25047
E9PMT2	E9PMT2	Uncharacterized protein OS=Homo sapiens GN=LMO7 PE=4 SV=1	-0.0728365	-0.22984	0.209114	0.735631	1.58755	1.45451	-0.0311875	1.25923	-1.29042
E9PMW7	E9PMW7	Uncharacterized protein OS=Homo sapiens GN=EEF1D PE=4 SV=1	0.340558	0.952806	0.47399	0.294903	1.36341	0.259205	0.589118	0.639173	-0.0500546
E9PMY9	E9PMY9	Uncharacterized protein OS=Homo sapiens GN=TXNRD1 PE=3 SV=1	1.44245	1.06603	1.18995	1.71119	1.0599	1.35826	1.23281	1.37645	-0.14364
E9PN11	E9PN11	Uncharacterized protein OS=Homo sapiens GN=RHOC PE=3 SV=1		0.358341	1.22052		2.69523	0.269577	0.789429	1.48241	-0.692977
E9PN25	E9PN25	Uncharacterized protein OS=Homo sapiens GN=HSPA8 PE=3 SV=1	1.07376	0.539925	0.993816	1.08112	1.19051	1.23425	0.869168	1.16862	-0.299457
E9PN89	E9PN89	Uncharacterized protein OS=Homo sapiens GN=HSPA8 PE=3 SV=1	1.76728	1.36001	1.49303	1.82632	1.93985	1.97617	1.54011	1.91411	-0.374006
E9PN91	E9PN91	Uncharacterized protein OS=Homo sapiens GN=EEF1D PE=4 SV=1	0.351218	0.908403	0.417841	0.268306	1.57189	0.241565	0.559154	0.693922	-0.134768
E9PND2	E9PND2	Uncharacterized protein OS=Homo sapiens GN=CSRP1 PE=4 SV=1	0.966553	0.438554	-0.205001	0.225846	-0.34949	0.794121	0.400035	0.223492	0.176543
E9PNE6	E9PNE6	Uncharacterized protein OS=Homo sapiens GN=HSPA8 PE=3 SV=1	0.847787	0.59414	0.611479	0.719992	0.755813	0.821399	0.684469	0.765734	-0.0812656
E9PNH1	E9PNH1	Uncharacterized protein OS=Homo sapiens GN=GANAB PE=4 SV=1	-0.795	0.176577	0.853298	0.52024	0.763809	0.153801	0.0782916	0.479283	-0.400992
E9PNH7	E9PNH7	Uncharacterized protein OS=Homo sapiens GN=CRYAB PE=3 SV=1	1.73073	0.471408	0.580409	-0.570487	-0.322109	-0.248479	0.927516	-0.380358	1.30787
E9PNL5	E9PNL5	Uncharacterized protein OS=Homo sapiens GN=CTSB PE=4 SV=1	-1.57566	-0.579738	0.28942	-0.496185	1.59371	1.24253	-0.621994	0.780016	-1.40201
E9PNQ6	E9PNQ6	Uncharacterized protein OS=Homo sapiens GN=TXNRD1 PE=3 SV=1	1.34236	1.00513	1.21011	1.80087	1.42084	1.41597	1.18587	1.54589	-0.360026
E9PNQ8	E9PNQ8	Uncharacterized protein OS=Homo sapiens GN=THY1 PE=4 SV=1	0.500048	0.713092	1.04337	0.798878	1.69722	1.14904	0.752168	1.21504	-0.462876
E9PNR9	E9PNR9	Uncharacterized protein OS=Homo sapiens GN=PRMT1 PE=4 SV=1	0.49041		0.415118	0.306849		0.928845	0.452764	0.617847	-0.165083
E9PNT6	E9PNT6	Uncharacterized protein OS=Homo sapiens GN=RCN1 PE=4 SV=1	0.678318	0.356074	0.322753	0.773905	-0.195211	-0.0322349	0.452382	0.182153	0.270229
E9PNW4	E9PNW4	Uncharacterized protein OS=Homo sapiens GN=CD59 PE=4 SV=1	4.44078	5.21304	3.41944	4.7728	6.58756	2.55605	4.35775	4.63881	-0.281052
E9PNX1	E9PNX1	Uncharacterized protein OS=Homo sapiens GN=SERPINH1 PE=3 SV=1	1.42858	0.881151	3.81844	2.22932	-0.300331	4.03965	2.04272	1.98954	0.053178
E9PP21	E9PP21	Uncharacterized protein OS=Homo sapiens GN=CSRP1 PE=4 SV=1	0.966553	0.438554	-0.205001	0.225846	-0.34949	0.794121	0.400035	0.223492	0.176543
E9PP23	E9PP23	Uncharacterized protein OS=Homo sapiens GN=ACP2 PE=4 SV=1	-0.062223	0.513266	0.871888	0.675061	0.491986	0.98546	0.440977	0.717502	-0.276525
E9PP50	E9PP50	Uncharacterized protein OS=Homo sapiens GN=CFL1 PE=4 SV=1	1.6269	0.600504	0.738449	1.73354	0.894291	1.46908	0.988617	1.36564	-0.37702
E9PP90	E9PP90	Uncharacterized protein OS=Homo sapiens GN=CTTN PE=4 SV=1	0.436644	-0.0878745	0.541971	0.208206	0.174013	0.283624	0.296914	0.221948	0.0749657
E9PPM8	E9PPM8	Uncharacterized protein OS=Homo sapiens GN=DERA PE=4 SV=1	0.139061	0.0470523	-0.416511	0.377245	-0.0527689	0.693622	-0.0767992	0.339366	-0.416165
E9PPR1	E9PPR1	Uncharacterized protein OS=Homo sapiens GN=EEF1D PE=4 SV=1	0.351218	0.967559	0.515368	0.3215	1.38771	0.241565	0.611382	0.650259	-0.0388777
E9PPV6	E9PPV6	Uncharacterized protein OS=Homo sapiens GN=SERPINH1 PE=3 SV=1	1.02763	0.680887	2.74092	0.460287	-0.0317586	2.47269	1.48315	0.967073	0.516075
E9PPY6	E9PPY6	Uncharacterized protein OS=Homo sapiens GN=HSPA8 PE=3 SV=1	1.08719	0.539925	0.953392	1.06616	1.19051	0.68441	0.860168	0.980357	-0.12019
E9PQ14	E9PQ14	Uncharacterized protein OS=Homo sapiens GN=DPP3 PE=4 SV=1	0.968293	-0.0879564	-0.235294	0.259926	0.0730963	-0.0893371	0.215014	0.0812283	0.133786
E9PQ34	E9PQ34	Uncharacterized protein OS=Homo sapiens GN=SERPINH1 PE=4 SV=1	1.42858	0.458771	4.87528	2.22932	-0.568903	5.54883	2.25421	2.40308	-0.14887
E9PQ49	E9PQ49	Uncharacterized protein OS=Homo sapiens GN=EEF1D PE=4 SV=1	0.351218	0.967559	0.515368	0.3215	1.38771	0.241565	0.611382	0.650259	-0.0388777
E9PQ63	E9PQ63	Uncharacterized protein OS=Homo sapiens GN=CBR1 PE=4 SV=1	1.27188	0.281839	0.00781315	0.298996	-0.537852	0.701309	0.520511	0.154151	0.366361
E9PQ98	E9PQ98	Uncharacterized protein OS=Homo sapiens GN=PRMT1 PE=4 SV=1	0.49041	0.84315	0.415118	0.306849	0.0353977	0.928845	0.582893	0.423697	0.159196
E9PQB5	E9PQB5	Uncharacterized protein OS=Homo sapiens GN=PRCP PE=4 SV=1	0.558283		0.588213	0.301114		0.12982	0.573248	0.215467	0.357781
E9PQB7	E9PQB7	Uncharacterized protein OS=Homo sapiens GN=CFL1 PE=4 SV=1	1.59331	0.600504	0.198546	1.97032	1.25302	1.52903	0.797453	1.58412	-0.786669
E9PQD7	E9PQD7	Uncharacterized protein OS=Homo sapiens GN=RPS2 PE=4 SV=1	0.872618	0.791506	1.01567	-0.260109	0.294822	-0.222984	0.893266	-0.0627572	0.956023
E9PQH6	E9PQH6	Uncharacterized protein OS=Homo sapiens GN=RHOC PE=3 SV=1		0.358341	1.22052		2.69523	0.269577	0.789429	1.48241	-0.692977
E9PQK7	E9PQK7	Uncharacterized protein OS=Homo sapiens GN=HSPA8 PE=3 SV=1	1.06205	0.59218	0.968913	1.08112	1.39774	1.34965	0.87438	1.27617	-0.401791
E9PQM1	E9PQM1	Uncharacterized protein OS=Homo sapiens GN=CTSB PE=4 SV=1	-1.57566	-0.579738	0.28942	-0.496185	1.59371	1.24253	-0.621994	0.780016	-1.40201
E9PQN3	E9PQN3	Uncharacterized protein OS=Homo sapiens GN=PRCP PE=4 SV=1	0.558283		0.588213	0.301114		0.12982	0.573248	0.215467	0.357781
E9PQQ4	E9PQQ4	Uncharacterized protein OS=Homo sapiens GN=HSPA8 PE=3 SV=1	1.06205	0.59218	0.968913	1.08112	1.39774	1.34965	0.87438	1.27617	-0.401791
E9PQW9	E9PQW9	Uncharacterized protein OS=Homo sapiens GN=ACP2 PE=4 SV=1	-0.062223	0.513266	0.871888	0.675061	0.491986	0.98546	0.440977	0.717502	-0.276525
E9PQY3	E9PQY3	Uncharacterized protein OS=Homo sapiens GN=ACP2 PE=4 SV=1	-0.306347	0.2364	1.02025	0.632732	1.09438	1.09081	0.316767	0.939307	-0.62254
E9PQZ1	E9PQZ1	Uncharacterized protein OS=Homo sapiens GN=EEF1D PE=3 SV=1	0.43469	0.643396	0.408669	0.420758	1.17147	-0.290346	0.495585	0.43396	0.0616245
E9PR17	E9PR17	Uncharacterized protein OS=Homo sapiens GN=CD59 PE=4 SV=1	4.44078	5.21304	3.41944	4.7728	6.58756	2.55605	4.35775	4.63881	-0.281052
E9PR44	E9PR44	Uncharacterized protein OS=Homo sapiens GN=CRYAB PE=3 SV=1	1.73073	0.703102	0.580409	-0.570487	-0.284107	-0.248479	1.00475	-0.367691	1.37244
E9PR70	E9PR70	Uncharacterized protein OS=Homo sapiens GN=SERPINH1 PE=3 SV=1	1.02763	0.680887	2.74092	0.460287	-0.0317586	2.47269	1.48315	0.967073	0.516075
E9PRA8	E9PRA8	Uncharacterized protein OS=Homo sapiens GN=CRYAB PE=4 SV=1	1.73073	0.471408	0.580409	-0.570487	-0.322109	-0.248479	0.927516	-0.380358	1.30787
E9PRQ6	E9PRQ6	Uncharacterized protein OS=Homo sapiens GN=ACAT1 PE=4 SV=1	0.487122	0.637905	1.1649	0.270499	0.113417	-0.441132	0.76331	-0.0190722	0.782382
E9PRS3	E9PRS3	Uncharacterized protein OS=Homo sapiens GN=SERPINH1 PE=4 SV=1	1.42858	0.458771	4.87528	2.22932	-0.568903	5.54883	2.25421	2.40308	-0.14887
E9PRY8	E9PRY8	Uncharacterized protein OS=Homo sapiens GN=EEF1D PE=3 SV=1	0.351218	0.967559	0.515368	0.3215	1.38771	0.241565	0.611382	0.650259	-0.0388777
E9PS23	E9PS23	Uncharacterized protein OS=Homo sapiens GN=CFL1 PE=4 SV=1	1.66049	0.749189	0.195845	1.97032	0.892393	1.52903	0.868507	1.46391	-0.595406
E9PS42	E9PS42	Uncharacterized protein OS=Homo sapiens GN=CSRP1 PE=4 SV=1	0.921111	0.537601	-0.0671983	0.1222	-0.800783	1.00888	0.463838	0.1101	0.353738
E9PS65	E9PS65	Uncharacterized protein OS=Homo sapiens GN=HSPA8 PE=3 SV=1	1.1786	0.541401	0.509174	0.719992	0.586984	0.926452	0.743059	0.744476	-0.00141712
E9PSG5	E9PSG5	Uncharacterized protein OS=Homo sapiens GN=CTSB PE=4 SV=1	-1.57566	-0.579738	0.28942	-0.496185	1.59371	1.24253	-0.621994	0.780016	-1.40201
Q13011	ECH1	Delta(3,5)-Delta(2,4)-dienoyl-CoA isomerase, mitochondrial OS=Homo sapiens GN=ECH1 PE=1 SV=2	1.02603	1.02622	1.67026	0.763913	0.664769	0.568347	1.24084	0.665677	0.575159
P40939	ECHA	Trifunctional enzyme subunit alpha, mitochondrial OS=Homo sapiens GN=HADHA PE=1 SV=2	1.57195	1.58796	2.13454	0.997792	0.806385	1.19905	1.76482	1.00107	0.763743
P55084	ECHB	Trifunctional enzyme subunit beta, mitochondrial OS=Homo sapiens GN=HADHB PE=1 SV=3	0.689941	2.23845	1.15004	-0.416286	0.0759028	-0.271178	1.35948	-0.203854	1.56333
P30084	ECHM	Enoyl-CoA hydratase, mitochondrial OS=Homo sapiens GN=ECHS1 PE=1 SV=4	0.837654	0.684263	1.60786	1.00319	-0.00900657	1.40567	1.04326	0.799951	0.243308
O43854	EDIL3	EGF-like repeat and discoidin I-like domain-containing protein 3 OS=Homo sapiens GN=EDIL3 PE=1 SV=1	-0.0720612	-0.0260082	0.0835429	0.81987	0.41358	0.324179	-0.00484217	0.51921	-0.524052
Q15075	EEA1	Early endosome antigen 1 OS=Homo sapiens GN=EEA1 PE=1 SV=2	0.0145634	0.69374	0.464817	-0.0941718	0.557113	0.335868	0.39104	0.26627	0.12477
P68104	EF1A1	Elongation factor 1-alpha 1 OS=Homo sapiens GN=EEF1A1 PE=1 SV=1	1.20582	0.106655	0.542386	-0.120851	-0.0866234	0.437089	0.618287	0.0765383	0.541749
Q05639	EF1A2	Elongation factor 1-alpha 2 OS=Homo sapiens GN=EEF1A2 PE=1 SV=1	1.30888	0.242296	0.322127	0.0951866	0.0377368	-0.300139	0.624435	-0.0557384	0.680174
Q5VTE0	EF1A3	Putative elongation factor 1-alpha-like 3 OS=Homo sapiens GN=EEF1A1P5 PE=5 SV=1	1.20582	0.106655	0.542386	-0.120851	-0.0866234	0.437089	0.618287	0.0765383	0.541749
P24534	EF1B	Elongation factor 1-beta OS=Homo sapiens GN=EEF1B2 PE=1 SV=3	0.617912	1.28616	0.534294	0.299043	-0.46447	1.52793	0.812787	0.454168	0.35862
P26641	EF1G	Elongation factor 1-gamma OS=Homo sapiens GN=EEF1G PE=1 SV=3	0.664521	0.431714	0.295765	-0.300221	-0.131786	0.722537	0.464	0.0968432	0.367157
P13639	EF2	Elongation factor 2 OS=Homo sapiens GN=EEF2 PE=1 SV=4	1.24368	0.584607	-0.196219	1.12983	0.285519	0.895419	0.544023	0.770255	-0.226232
P49411	EFTU	Elongation factor Tu, mitochondrial OS=Homo sapiens GN=TUFM PE=1 SV=2	0.995708	0.917592	1.49823	-0.416919	-0.595347	0.407494	1.13718	-0.20159	1.33877
P17813	EGLN	Endoglin OS=Homo sapiens GN=ENG PE=1 SV=2	0.757077	0.979876	1.16409	1.18384	1.79945	1.72729	0.967014	1.57019	-0.603181
Q9UBQ5	EIF3K	Eukaryotic translation initiation factor 3 subunit K OS=Homo sapiens GN=EIF3K PE=1 SV=1	0.809321	-0.463183	-0.388895	-0.0283974	-0.644508	-0.382803	-0.0142522	-0.351903	0.337651
P06733	ENOA	Alpha-enolase OS=Homo sapiens GN=ENO1 PE=1 SV=2	2.20727	1.20614	0.896996	1.87861	0.707434	1.6495	1.4368	1.41185	0.0249569
P09104	ENOG	Gamma-enolase OS=Homo sapiens GN=ENO2 PE=1 SV=3	1.6877	1.1418	0.867375	1.8412	1.10318	1.68691	1.23229	1.54376	-0.311471
P14625	ENPL	Endoplasmin OS=Homo sapiens GN=HSP90B1 PE=1 SV=1	1.08318	1.23036	1.37334	1.16537	0.891067	1.35031	1.22896	1.13558	0.0933789
Q58FF3	ENPLL	Putative endoplasmin-like protein OS=Homo sapiens GN=HSP90B2P PE=5 SV=1	-0.0189382		0.710326	-0.0755715		-0.068319	0.345694	-0.0719452	0.417639
Q9UM22	EPDR1	Mammalian ependymin-related protein 1 OS=Homo sapiens GN=EPDR1 PE=1 SV=2	1.35939	-0.030019	-0.736616	1.6429	-0.225708	-0.782649	0.197585	0.211513	-0.0139275
P30040	ERP29	Endoplasmic reticulum resident protein 29 OS=Homo sapiens GN=ERP29 PE=1 SV=4	0.106608	0.549751	0.968648	0.535571	1.6365	0.723222	0.541669	0.965097	-0.423428
Q9BS26	ERP44	Endoplasmic reticulum resident protein 44 OS=Homo sapiens GN=ERP44 PE=1 SV=1	0.235766	0.494009	0.98479	0.764201	1.09485	1.23718	0.571522	1.03208	-0.460555
P10768	ESTD	S-formylglutathione hydrolase OS=Homo sapiens GN=ESD PE=1 SV=2	1.5141	0.0645399	0.111631	0.652663	0.430212	-0.0810472	0.563424	0.333943	0.229481
Q9BSJ8	ESYT1	Extended synaptotagmin-1 OS=Homo sapiens GN=ESYT1 PE=1 SV=1		0.87371	1.52171		-0.345285	-0.17667	1.19771	-0.260978	1.45869
P13804	ETFA	Electron transfer flavoprotein subunit alpha, mitochondrial OS=Homo sapiens GN=ETFA PE=1 SV=1	0.611899	0.688411	0.872667	0.283971	-0.173276	-0.249563	0.724326	-0.0462895	0.770615
P38117	ETFB	Electron transfer flavoprotein subunit beta OS=Homo sapiens GN=ETFB PE=1 SV=3	0.361109	0.393967	0.82056	-0.0248049	0.463908	-0.461214	0.525212	-0.00737042	0.532582
O95571	ETHE1	Protein ETHE1, mitochondrial OS=Homo sapiens GN=ETHE1 PE=1 SV=2	0.386131	0.534028	0.67606	0.0274448	-0.0338474	0.370572	0.532073	0.12139	0.410683
P15311	EZRI	Ezrin OS=Homo sapiens GN=EZR PE=1 SV=4	0.37461	-0.0797125	-0.309589	0.466458	0.545244	1.16308	-0.00489719	0.724926	-0.729823
P50502	F10A1	Hsc70-interacting protein OS=Homo sapiens GN=ST13 PE=1 SV=2	1.03929	0.329484	0.272714	0.370796	0.3358	-0.0750678	0.547162	0.21051	0.336652
Q8NFI4	F10A5	Putative protein FAM10A5 OS=Homo sapiens GN=ST13P5 PE=5 SV=1	1.02964	0.712601	0.19941	0.363664	0.347897	0.0813783	0.647217	0.264313	0.382904
F1T0G5	F1T0G5	Guanine nucleotide binding protein (G protein), beta polypeptide 3 OS=Homo sapiens GN=GNB3 PE=2 SV=1		1.81899	1.54969		2.49401	1.06652	1.68434	1.78027	-0.0959289
F2Z2J9	F2Z2J9	Phosphoglycerate mutase OS=Homo sapiens PE=3 SV=1	1.98333	0.714805	0.705784	1.6437	0.508648	1.3287	1.13464	1.16035	-0.0257068
F2Z2Y8	F2Z2Y8	Uncharacterized protein OS=Homo sapiens GN=TOLLIP PE=4 SV=1	0.703998	0.700986		-0.0107553	0.216991		0.702492	0.103118	0.599374
F2Z388	F2Z388	Uncharacterized protein OS=Homo sapiens GN=RPL35 PE=3 SV=1	0.779875	0.236487	-0.805655	-0.323861	0.22359	0.201047	0.0702357	0.0335921	0.0366436
F2Z393	F2Z393	Transaldolase OS=Homo sapiens GN=TALDO1 PE=3 SV=1	0.606048	0.169348	2.90505	0.112131	0.181804	3.18499	1.22682	1.15964	0.0671756
F2Z3A5	F2Z3A5	Uncharacterized protein OS=Homo sapiens GN=RPL3 PE=3 SV=1	0.941567	1.33251	1.06132	0.504417	1.57261	1.14127	1.1118	1.07277	0.039033
F5GWF6	F5GWF6	Uncharacterized protein OS=Homo sapiens GN=CCT2 PE=3 SV=2	0.884678	0.608049	1.23402	-0.117687	-0.493318	0.926736	0.908915	0.105244	0.803671
F5GWH9	F5GWH9	Uncharacterized protein OS=Homo sapiens GN=HYOU1 PE=3 SV=1		1.0019	0.726375		0.0796568	2.15897	0.864139	1.11931	-0.255175
F5GWI3	F5GWI3	Uncharacterized protein OS=Homo sapiens GN=DPYSL3 PE=4 SV=1	0.639986	-0.0185322	-0.424534	0.688061	0.401725	0.512191	0.06564	0.533992	-0.468352
F5GWQ3	F5GWQ3	Uncharacterized protein OS=Homo sapiens GN=ENO2 PE=4 SV=1	0.960434	0.371607	-0.295814	0.894693	-0.523749	0.701751	0.345409	0.357565	-0.0121565
F5GWQ7	F5GWQ7	Uncharacterized protein OS=Homo sapiens GN=TAF15 PE=4 SV=1	0.371428	0.333586	0.145237	0.572762	0.521487	0.635173	0.283417	0.576474	-0.293057
F5GWR2	F5GWR2	Uncharacterized protein OS=Homo sapiens GN=HSPD1 PE=3 SV=1	0.354683	0.65914	1.03354	-0.147626	-0.817789	0.255498	0.682455	-0.236639	0.919094
F5GWR5	F5GWR5	Uncharacterized protein OS=Homo sapiens GN=FHL1 PE=4 SV=1	0.839156	0.710172	0.879244	-0.276463	0.215794	0.661814	0.809524	0.200382	0.609142
F5GWW0	F5GWW0	Uncharacterized protein OS=Homo sapiens GN=CTSB PE=3 SV=1	0.0895457	0.147704	0.55979	0.642261	0.783927	0.601305	0.26568	0.675831	-0.410151
F5GWY2	F5GWY2	Uncharacterized protein OS=Homo sapiens GN=ATIC PE=4 SV=1	1.47541	0.783137	-0.000452297	0.858844	0.356071	0.945369	0.752698	0.720095	0.0326034
F5GX11	F5GX11	Uncharacterized protein OS=Homo sapiens GN=PSMA1 PE=4 SV=1	0.894127		0.514656	0.539172		1.33455	0.704391	0.936862	-0.23247
F5GX23	F5GX23	Uncharacterized protein OS=Homo sapiens GN=PSMD9 PE=4 SV=1	0.923018	0.978384	-0.828495	0.491978	-2.27226	-0.158572	0.357636	-0.646286	1.00392
F5GX42	F5GX42	Uncharacterized protein OS=Homo sapiens GN=NOMO1 PE=4 SV=1	0.580881	0.100104	0.407855	0.452424	-0.15272	-0.281834	0.362947	0.00595657	0.35699
F5GX88	F5GX88	Uncharacterized protein OS=Homo sapiens GN=ENG PE=4 SV=1	0.617652	0.762189	1.52812	1.15047	1.83282	1.44075	0.969321	1.47468	-0.50536
F5GXD5	F5GXD5	Uncharacterized protein OS=Homo sapiens GN=DPP3 PE=4 SV=1	0.968293	-0.0879564	0.0390528	0.259926	0.0730963	1.16835	0.306463	0.500458	-0.193995
F5GXH2	F5GXH2	Uncharacterized protein OS=Homo sapiens GN=LDHA PE=3 SV=1	1.0062	0.0952255	-0.616764	0.386696	-0.27095	0.490931	0.161555	0.202226	-0.0406701
F5GXI3	F5GXI3	Uncharacterized protein OS=Homo sapiens GN=HYOU1 PE=3 SV=1	0.682767		0.922267	0.728239		2.04943	0.802517	1.38884	-0.586319
F5GXJ9	F5GXJ9	Uncharacterized protein OS=Homo sapiens GN=ALCAM PE=4 SV=1	-0.080489	-0.178811	-0.0474733	0.302046	1.16307	-0.0177332	-0.102258	0.482462	-0.58472
F5GXL8	F5GXL8	Uncharacterized protein OS=Homo sapiens GN=ACAA1 PE=3 SV=1	-0.150692	0.548224	0.434536	0.203211	0.0736275	0.820663	0.277356	0.365834	-0.0884781
F5GXS2	F5GXS2	Uncharacterized protein OS=Homo sapiens GN=ACTN4 PE=4 SV=1	0.828392	0.870654	0.730298	1.38463	0.922699	1.48846	0.809781	1.26526	-0.45548
F5GXY2	F5GXY2	Uncharacterized protein OS=Homo sapiens GN=LDHA PE=3 SV=1	1.0062	0.0952255	-0.616764	0.386696	-0.27095	0.490931	0.161555	0.202226	-0.0406701
F5GXZ9	F5GXZ9	Uncharacterized protein OS=Homo sapiens GN=SOD2 PE=3 SV=1	0.456466	0.264792	0.788128	0.636701	-0.000558937	0.243496	0.503129	0.293213	0.209916
F5GY03	F5GY03	Uncharacterized protein OS=Homo sapiens GN=SPARC PE=4 SV=1	0.270909	0.352061	0.974119	0.391762	0.658965	1.50564	0.532363	0.852124	-0.319761
F5GY21	F5GY21	Uncharacterized protein OS=Homo sapiens GN=RAB8B PE=3 SV=1	0.502986	0.367739	0.443743	0.0467269	0.254549	-0.15422	0.438156	0.0490184	0.389138
F5GY34	F5GY34	Uncharacterized protein OS=Homo sapiens GN=PSMA8 PE=4 SV=1	0.422359	0.0504314	0.0292779	0.354509	-0.0538108	-0.122987	0.167356	0.0592372	0.108119
F5GY39	F5GY39	Uncharacterized protein OS=Homo sapiens GN=FAM21B PE=4 SV=1	0.304454	0.139616	0.485236	0.443356	-0.0719991	1.01501	0.309769	0.462123	-0.152354
F5GY55	F5GY55	Uncharacterized protein OS=Homo sapiens GN=DDB1 PE=4 SV=1	0.33779	0.367007	0.213632	0.340795	0.591525	0.296105	0.306143	0.409475	-0.103332
F5GY62	F5GY62	Uncharacterized protein OS=Homo sapiens GN=LIMCH1 PE=4 SV=1	-0.0549724	-0.0966926	-0.263283	0.464977	0.75816	0.254125	-0.138316	0.492421	-0.630736
F5GYD8	F5GYD8	Uncharacterized protein OS=Homo sapiens GN=GBA PE=4 SV=1	0.193309	0.430644	0.48247	0.357846	-0.498774	0.667867	0.368808	0.175647	0.193161
F5GYE5	F5GYE5	Uncharacterized protein OS=Homo sapiens PE=4 SV=1	0.49079	0.430644	0.445655	0.407161	-0.498774	0.443057	0.455696	0.117148	0.338548
F5GYF5	F5GYF5	Uncharacterized protein OS=Homo sapiens GN=VPS35 PE=4 SV=1	0.57859	0.352275	0.157303	0.402183	0.426506	0.513011	0.362723	0.447233	-0.0845104
F5GYP4	F5GYP4	Uncharacterized protein OS=Homo sapiens GN=ACADVL PE=4 SV=1	0.467275	0.901642	1.03469	-0.108841	-0.6747	-0.101512	0.801202	-0.295018	1.09622
F5GYQ4	F5GYQ4	Uncharacterized protein OS=Homo sapiens GN=GLUD1 PE=3 SV=1	0.266439	0.393139	0.784417	0.28109	0.475464	0.0719141	0.481332	0.276156	0.205176
F5GYQ8	F5GYQ8	Uncharacterized protein OS=Homo sapiens GN=ACOX1 PE=4 SV=1	1.28659	2.15516	1.55816	0.237993	-0.139137	-0.121165	1.66664	-0.00743635	1.67407
F5GYT4	F5GYT4	Uncharacterized protein OS=Homo sapiens GN=ACTB PE=3 SV=1	3.06037	3.0345	3.41848	3.65816	3.82905	3.64764	3.17112	3.71162	-0.540502
F5GYU2	F5GYU2	Uncharacterized protein OS=Homo sapiens GN=LDHA PE=3 SV=1	1.0062	0.0952255	-0.616764	0.386696	-0.27095	0.490931	0.161555	0.202226	-0.0406701
F5GYZ5	F5GYZ5	Uncharacterized protein OS=Homo sapiens GN=SOD2 PE=3 SV=1	0.497401	0.710343	0.788128	0.469867	0.246269	0.243496	0.665291	0.319877	0.345413
F5GZ16	F5GZ16	Uncharacterized protein OS=Homo sapiens GN=PSMD2 PE=4 SV=1	0.601316	0.335275	0.798951	0.342063	0.354624	0.823433	0.578514	0.506707	0.0718072
F5GZ30	F5GZ30	Uncharacterized protein OS=Homo sapiens GN=ENO2 PE=4 SV=1	0.960434	0.371607	-0.295814	0.894693	-0.523749	0.701751	0.345409	0.357565	-0.0121565
F5GZ32	F5GZ32	Uncharacterized protein OS=Homo sapiens GN=IMMT PE=4 SV=1	0.108684	0.821467	0.663856	-0.307073	-0.063926	-0.224852	0.531335	-0.198617	0.729952
F5GZ62	F5GZ62	Uncharacterized protein OS=Homo sapiens GN=HSPA1B PE=3 SV=1	0.580505	0.845883	0.502726	0.330586	0.500425	0.832236	0.643038	0.554416	0.0886224
F5GZD0	F5GZD0	Uncharacterized protein OS=Homo sapiens GN=NPTN PE=4 SV=1	0.25897	0.503715	1.4447	1.38924	0.816276	1.19976	0.735797	1.13509	-0.399298
F5GZD1	F5GZD1	Uncharacterized protein OS=Homo sapiens GN=KRT7 PE=4 SV=1	0.329936	0.990362	0.466673	0.271631	0.23919	0.159036	0.595657	0.223286	0.372371
F5GZG3	F5GZG3	Uncharacterized protein OS=Homo sapiens GN=EEF2 PE=4 SV=1	0.979677	0.136398	-0.548305	0.849785	-0.502902	0.912128	0.189257	0.41967	-0.230414
F5GZI9	F5GZI9	Uncharacterized protein OS=Homo sapiens GN=ACTN1 PE=4 SV=1	1.11631	0.911043	0.958202	1.7686	1.12368	1.97862	0.995186	1.62363	-0.628448
F5GZK5	F5GZK5	Uncharacterized protein OS=Homo sapiens GN=CCT7 PE=3 SV=1	0.527621		-1.39227	-0.725355		-2.12072	-0.432326	-1.42304	0.990713
F5GZL8	F5GZL8	Uncharacterized protein OS=Homo sapiens GN=GNAI2 PE=4 SV=1	-0.0619874	-0.268349	0.266992	0.465132	0.831863	0.787837	-0.0211147	0.694944	-0.716058
F5GZN3	F5GZN3	Uncharacterized protein OS=Homo sapiens GN=MFGE8 PE=4 SV=1	0.147653	0.556043	0.796047	0.739684	0.432708	-0.00531646	0.499914	0.389025	0.110889
F5GZQ3	F5GZQ3	Uncharacterized protein OS=Homo sapiens GN=HADHB PE=3 SV=1	0.689941	2.23845	1.15004	-0.416286	0.0759028	-0.271178	1.35948	-0.203854	1.56333
F5GZQ4	F5GZQ4	Uncharacterized protein OS=Homo sapiens GN=LDHA PE=3 SV=1	1.38563	0.515843	-0.365821	0.794081	-1.64322	0.884267	0.511883	0.0117097	0.500173
F5GZT6	F5GZT6	Uncharacterized protein OS=Homo sapiens GN=CALU PE=4 SV=1	0.291157	0.679202	0.482632	0.446681	0.676041	0.305703	0.48433	0.476142	0.00818824
F5H046	F5H046	Uncharacterized protein OS=Homo sapiens GN=FAM21B PE=4 SV=1	0.304454	0.139616	0.485236	0.443356	-0.0719991	1.01501	0.309769	0.462123	-0.152354
F5H098	F5H098	Malate dehydrogenase OS=Homo sapiens GN=MDH1 PE=3 SV=1	1.60727	0.661043	0.477932	1.04537	0.82167	0.271675	0.915413	0.712905	0.202508
F5H0C8	F5H0C8	Enolase OS=Homo sapiens GN=ENO2 PE=3 SV=1	1.6877	1.1418	0.867375	1.8412	1.10318	1.68691	1.23229	1.54376	-0.311471
F5H0J6	F5H0J6	Uncharacterized protein OS=Homo sapiens GN=FAM21C PE=4 SV=1	0.304454	0.0177841	0.485236	0.443356	-0.232379	1.01501	0.269158	0.408663	-0.139505
F5H0L3	F5H0L3	6-phosphogluconate dehydrogenase, decarboxylating OS=Homo sapiens GN=PGD PE=3 SV=1	1.56867	0.704974	0.788874	0.677681	0.265249	0.520094	1.02084	0.487675	0.533166
F5H0N0	F5H0N0	Uncharacterized protein OS=Homo sapiens GN=ACTG1 PE=3 SV=1	3.10591	3.03164	3.47453	3.60212	4.06293	3.6201	3.20403	3.76172	-0.55769
F5H0N4	F5H0N4	Uncharacterized protein OS=Homo sapiens GN=FKBP2 PE=3 SV=1	0.402436	1.17215	0.194621	0.0352743	-0.466144	0.164275	0.589734	-0.0888648	0.678599
F5H0Q5	F5H0Q5	Uncharacterized protein OS=Homo sapiens GN=AHSG PE=4 SV=1	0.454482	-0.379434	1.58797	-0.0958099	1.24361	0.656293	0.554339	0.601363	-0.047024
F5H0S8	F5H0S8	Uncharacterized protein OS=Homo sapiens GN=GNB3 PE=4 SV=1		1.81899	1.54969		2.49401	1.06652	1.68434	1.78027	-0.0959289
F5H0X6	F5H0X6	Uncharacterized protein OS=Homo sapiens GN=PSAP PE=4 SV=1	1.81606	3.06146	3.33977	2.37394	2.87025	3.1131	2.7391	2.78576	-0.0466669
F5H0X8	F5H0X8	Uncharacterized protein OS=Homo sapiens GN=PDLIM5 PE=4 SV=1	0.964079	-0.0126123	0.305052	0.937082	1.37513	0.431471	0.41884	0.914562	-0.495722
F5H100	F5H100	Uncharacterized protein OS=Homo sapiens GN=GNB3 PE=4 SV=1		1.81899	1.54969		2.49401	1.06652	1.68434	1.78027	-0.0959289
F5H119	F5H119	Uncharacterized protein OS=Homo sapiens GN=PDIA3 PE=3 SV=1	0.454306	0.805488	1.06853	1.20705	1.39607	1.28308	0.776109	1.2954	-0.519291
F5H157	F5H157	Uncharacterized protein OS=Homo sapiens GN=RAB35 PE=3 SV=1	0.502986	0.367739	0.443743	0.0467269	0.254549	-0.15422	0.438156	0.0490184	0.389138
F5H1A7	F5H1A7	Uncharacterized protein OS=Homo sapiens GN=RDX PE=4 SV=1	0.645889	0.306479	0.252353	0.464245	0.752932	0.94041	0.401574	0.719196	-0.317622
F5H1A8	F5H1A8	Uncharacterized protein OS=Homo sapiens GN=GSN PE=4 SV=1	0.967494	0.465372	0.134875	0.667324	0.084136	0.582161	0.52258	0.44454	0.07804
F5H1B6	F5H1B6	Uncharacterized protein OS=Homo sapiens GN=PPP1R12A PE=4 SV=1	-0.0335231	-0.0816372	0.111379	0.430963	-0.0410439	0.583807	-0.00126052	0.324575	-0.325836
F5H1C1	F5H1C1	Uncharacterized protein OS=Homo sapiens GN=ACTC1 PE=3 SV=1	3.10623	2.95042	3.55401	3.57306	4.70722	3.23138	3.20355	3.83722	-0.633665
F5H1C3	F5H1C3	Uncharacterized protein OS=Homo sapiens GN=ENO2 PE=4 SV=1	0.960434	0.371607	-0.295814	0.894693	-0.523749	0.701751	0.345409	0.357565	-0.0121565
F5H1D3	F5H1D3	Uncharacterized protein OS=Homo sapiens GN=HSPA1A PE=3 SV=1	0.580505	0.845883	0.502726	0.330586	0.500425	0.832236	0.643038	0.554416	0.0886224
F5H1F8	F5H1F8	Uncharacterized protein OS=Homo sapiens GN=CLIC4 PE=4 SV=1	1.06701	0.429901	0.142553	0.201079	-0.248585	0.671123	0.546488	0.207872	0.338615
F5H1H6	F5H1H6	Uncharacterized protein OS=Homo sapiens GN=SPECC1L PE=4 SV=1	-0.2138	0.39683	0.443255	0.180456	0.171637	0.482616	0.208762	0.278236	-0.0694748
F5H1I8	F5H1I8	Uncharacterized protein OS=Homo sapiens GN=XRCC6 PE=4 SV=1	0.0828253	0.514473	0.221258	0.210488	0.626595	0.459145	0.272852	0.432076	-0.159223
F5H1P8	F5H1P8	Uncharacterized protein OS=Homo sapiens GN=FKBP10 PE=4 SV=1	-0.0352898	0.493636	0.297494	-0.677068	-0.295487	-0.0425564	0.251947	-0.33837	0.590317
F5H1Q9	F5H1Q9	Uncharacterized protein OS=Homo sapiens GN=CALU PE=4 SV=1	0.797969	0.069123	0.753155	1.27387	0.6731	0.742454	0.540082	0.896475	-0.356392
F5H1S2	F5H1S2	60S ribosomal protein L13 OS=Homo sapiens GN=RPL13 PE=3 SV=1	0.837438	0.95613	0.131798	-0.353639	0.246621	-0.115341	0.641789	-0.0741197	0.715908
F5H1S6	F5H1S6	Uncharacterized protein OS=Homo sapiens GN=ACP2 PE=4 SV=1	-0.278554	0.2364	1.02025	0.612043	1.09438	1.09081	0.326031	0.93241	-0.606379
F5H1X1	F5H1X1	Ferritin OS=Homo sapiens GN=FTL PE=3 SV=1	1.15765	0.688679	1.27803	0.714694	0.898707	0.446051	1.04145	0.686484	0.354967
F5H1Z9	F5H1Z9	Uncharacterized protein OS=Homo sapiens GN=CALD1 PE=4 SV=1	0.473985	0.23273	0.325438	0.857305	1.33713	0.587094	0.344051	0.927175	-0.583124
F5H223	F5H223	Uncharacterized protein OS=Homo sapiens GN=DCTN2 PE=4 SV=1	0.473639	0.459277	-0.147669	0.285138	0.255326	0.656351	0.261749	0.398938	-0.137189
F5H238	F5H238	Uncharacterized protein OS=Homo sapiens GN=DDB1 PE=4 SV=1	0.3562	0.367007	0.67622	0.314212	0.606881	0.841004	0.466475	0.587366	-0.120891
F5H241	F5H241	Uncharacterized protein OS=Homo sapiens GN=GBA PE=4 SV=1	0.49079	0.430644	0.445655	0.407161	-0.498774	0.443057	0.455696	0.117148	0.338548
F5H260	F5H260	Uncharacterized protein OS=Homo sapiens GN=GNS PE=4 SV=1	-0.278604	-0.0135037	0.438809	0.476779	1.30618	0.231185	0.0489004	0.671383	-0.622482
F5H282	F5H282	T-complex protein 1 subunit alpha OS=Homo sapiens GN=TCP1 PE=3 SV=1		0.955994	0.642784		-0.133171	-0.214626	0.799389	-0.173898	0.973288
F5H288	F5H288	Uncharacterized protein OS=Homo sapiens GN=VIM PE=3 SV=1	3.70773	4.68142	4.31149	2.97405	3.96448	3.7215	4.23355	3.55334	0.680202
F5H299	F5H299	Uncharacterized protein OS=Homo sapiens GN=COL1A2 PE=4 SV=1	0.297254	0.150364	0.501308	0.767225	1.41288	0.659629	0.316309	0.946579	-0.63027
F5H2A5	F5H2A5	Uncharacterized protein OS=Homo sapiens GN=ACO2 PE=4 SV=1	1.30812	1.00188	0.883809	2.73517	0.898046	-0.224597	1.0646	1.13621	-0.0716065
F5H2A9	F5H2A9	Uncharacterized protein OS=Homo sapiens GN=ACADVL PE=3 SV=1	0.452492	0.901642	1.21976	0.0384428	-0.6747	-0.101512	0.857965	-0.245923	1.10389
F5H2N7	F5H2N7	Uncharacterized protein OS=Homo sapiens GN=FBN1 PE=4 SV=1	0.192122	0.520107	0.911389	0.232586	0.487208	-0.162374	0.541206	0.185807	0.355399
F5H2P9	F5H2P9	Uncharacterized protein OS=Homo sapiens GN=CTSB PE=3 SV=1	0.131124	0.170587	0.510218	0.672943	0.571556	0.597906	0.270643	0.614135	-0.343492
F5H2S7	F5H2S7	Uncharacterized protein OS=Homo sapiens GN=DCTN2 PE=4 SV=1	0.473639	0.459277	-0.147669	0.285138	0.255326	0.656351	0.261749	0.398938	-0.137189
F5H308	F5H308	L-lactate dehydrogenase OS=Homo sapiens GN=LDHA PE=3 SV=1	1.77753	0.565485	0.538297	1.38734	1.08992	0.665126	0.960438	1.04746	-0.0870246
F5H370	F5H370	Uncharacterized protein OS=Homo sapiens GN=EEF2 PE=4 SV=1	0.946701	0.136398	-0.548305	0.790143	0.180687	0.912128	0.178265	0.627653	-0.449388
F5H378	F5H378	Uncharacterized protein OS=Homo sapiens GN=GBE1 PE=4 SV=1	1.23319	0.414515	0.256214	0.480914	-0.306942	0.675135	0.634639	0.283035	0.351604
F5H399	F5H399	Uncharacterized protein OS=Homo sapiens GN=RAB2A PE=3 SV=1	0.477516	0.411793	0.500874	-0.457691	-0.571848	-0.0771282	0.463394	-0.368889	0.832284
F5H3A1	F5H3A1	Uncharacterized protein OS=Homo sapiens GN=ATP1A1 PE=3 SV=1		0.707023	0.766067		-0.292519	0.212629	0.736545	-0.0399451	0.77649
F5H3C5	F5H3C5	Uncharacterized protein OS=Homo sapiens GN=SOD2 PE=3 SV=1	0.497401	0.710343	0.788128	0.469867	0.246269	0.243496	0.665291	0.319877	0.345413
F5H3F1	F5H3F1	Uncharacterized protein OS=Homo sapiens GN=CALU PE=4 SV=1	0.0449012	0.679202	0.449902	0.543477	0.676041	0.875255	0.391335	0.698258	-0.306923
F5H3G5	F5H3G5	Proteasome subunit alpha type OS=Homo sapiens GN=PSMA8 PE=3 SV=1	0.422359	0.0504314	0.0292779	0.354509	-0.0538108	-0.122987	0.167356	0.0592372	0.108119
F5H3L8	F5H3L8	Uncharacterized protein OS=Homo sapiens GN=HSPA9 PE=3 SV=1	1.0812	1.10506	1.70194	1.35347	0.810249	1.31188	1.29607	1.15853	0.137538
F5H3P5	F5H3P5	Uncharacterized protein OS=Homo sapiens GN=ACTR3 PE=3 SV=1	0.508563	-0.1117	-0.330314	0.410402	0.217293	0.156239	0.0221829	0.261312	-0.239129
F5H3R0	F5H3R0	Uncharacterized protein OS=Homo sapiens GN=HSPA4 PE=3 SV=1	0.693475	0.0890979	0.142915	0.794493	0.177434	0.180202	0.308496	0.384043	-0.0755468
F5H3W9	F5H3W9	Uncharacterized protein OS=Homo sapiens GN=MYO1C PE=4 SV=1	0.184043	0.666761	0.203535	2.09846	0.753579	0.228151	0.351447	1.02673	-0.675284
F5H4C6	F5H4C6	Uncharacterized protein OS=Homo sapiens GN=GNS PE=4 SV=1	-0.278604	-0.0135037	0.438809	0.476779	1.30618	0.231185	0.0489004	0.671383	-0.622482
F5H4F5	F5H4F5	Uncharacterized protein OS=Homo sapiens GN=CALU PE=4 SV=1	0.392988	0.430908	0.768645	1.22042	0.731316	1.2656	0.530847	1.07244	-0.541596
F5H4I0	F5H4I0	Dihydrolipoyl dehydrogenase OS=Homo sapiens GN=DLD PE=3 SV=1	1.51533	0.513323	0.950506		0.231768	-0.253743	0.993054	-0.0109878	1.00404
F5H4J6	F5H4J6	Uncharacterized protein OS=Homo sapiens GN=LRPPRC PE=4 SV=1	0.894947	0.889238	1.48177	0.403738	0.411686	1.04037	1.08865	0.618599	0.470052
F5H4L7	F5H4L7	Uncharacterized protein OS=Homo sapiens GN=VPS26A PE=4 SV=1	0.636976	0.0824892	-0.0269521	0.295071	0.526847	0.748562	0.230838	0.523493	-0.292656
F5H4N9	F5H4N9	Uncharacterized protein OS=Homo sapiens GN=DDB1 PE=4 SV=1	0.3562	0.367007	0.67622	0.314212	0.606881	0.841004	0.466475	0.587366	-0.120891
F5H4R2	F5H4R2	Uncharacterized protein OS=Homo sapiens GN=SOD2 PE=3 SV=1	0.497401	0.710343	0.788128	0.469867	0.246269	0.243496	0.665291	0.319877	0.345413
F5H4S7	F5H4S7	Uncharacterized protein OS=Homo sapiens GN=SUCLG2 PE=4 SV=1	1.21829	0.956195	0.984029	0.311636	0.136369	0.162474	1.05284	0.203493	0.849346
F5H4U5	F5H4U5	Uncharacterized protein OS=Homo sapiens GN=GNAI2 PE=4 SV=1	-0.0619874	-0.268349	0.266992	0.465132	1.06799	0.726542	-0.0211147	0.753222	-0.774337
F5H4X7	F5H4X7	Uncharacterized protein OS=Homo sapiens GN=HYOU1 PE=3 SV=1	0.682767	1.0019	1.26969	0.728239	0.0796568	2.15897	0.984787	0.988956	-0.00416901
F5H4Z5	F5H4Z5	Uncharacterized protein OS=Homo sapiens GN=HYOU1 PE=3 SV=1	0.682767	1.0019	1.11816	0.728239	0.0796568	2.15897	0.934277	0.988956	-0.0546793
F5H503	F5H503	Uncharacterized protein OS=Homo sapiens GN=SOD1 PE=4 SV=1	0.976266	0.632594	0.905481	0.909103	-0.50077	1.21935	0.838114	0.542561	0.295552
F5H505	F5H505	Uncharacterized protein OS=Homo sapiens PE=4 SV=1	0.193309	0.430644	0.48247	0.357846	-0.498774	0.667867	0.368808	0.175647	0.193161
F5H581	F5H581	Uncharacterized protein OS=Homo sapiens GN=DDB1 PE=4 SV=1	0.329541	0.168824	-0.248956	0.377538	0.442907	-0.248794	0.0831364	0.190551	-0.107414
F5H5D3	F5H5D3	Uncharacterized protein OS=Homo sapiens GN=TUBA1C PE=3 SV=1	1.25932	0.625142	0.14578	0.604687	-0.594894	0.753967	0.676749	0.254587	0.422163
F5H5E1	F5H5E1	Uncharacterized protein OS=Homo sapiens PE=4 SV=1	0.49079	0.430644	0.445655	0.407161	-0.498774	0.443057	0.455696	0.117148	0.338548
F5H5E2	F5H5E2	Uncharacterized protein OS=Homo sapiens GN=PLBD2 PE=4 SV=1	0.210142	0.438595	0.726082	0.413246	1.08726	0.99527	0.458273	0.831924	-0.373651
F5H5H8	F5H5H8	Uncharacterized protein OS=Homo sapiens GN=VCL PE=4 SV=1	0.523408	0.247941	-0.14402	0.308775	-0.558557	-0.0850572	0.20911	-0.111613	0.320723
F5H5J4	F5H5J4	Uncharacterized protein OS=Homo sapiens GN=LDHA PE=3 SV=1	1.37389	0.515843	-0.34788	0.817821	-1.64322	0.764874	0.51395	-0.0201747	0.534124
F5H5M0	F5H5M0	Uncharacterized protein OS=Homo sapiens GN=ENG PE=4 SV=1	0.617652	0.762189	1.52812	1.15047	1.83282	1.44075	0.969321	1.47468	-0.50536
F5H5U1	F5H5U1	Uncharacterized protein OS=Homo sapiens GN=ENO2 PE=4 SV=1	0.960434	0.371607	-0.295814	0.894693	-0.523749	0.701751	0.345409	0.357565	-0.0121565
F5H5V4	F5H5V4	Uncharacterized protein OS=Homo sapiens GN=PSMD9 PE=4 SV=1	0.923018	0.978384	-0.828495	0.491978	-2.27226	-0.158572	0.357636	-0.646286	1.00392
F5H5W3	F5H5W3	T-complex protein 1 subunit delta OS=Homo sapiens GN=CCT4 PE=3 SV=1	0.626492	0.277315	0.18409	0.164993	-1.36903	0.755619	0.362632	-0.149471	0.512104
F5H608	F5H608	Uncharacterized protein OS=Homo sapiens GN=ATP5H PE=4 SV=1	0.803708	0.790784	1.65859	1.27769	0.832746	0.930029	1.08436	1.01349	0.0708714
F5H6B4	F5H6B4	Uncharacterized protein OS=Homo sapiens GN=ITIH3 PE=4 SV=1	0.0292594	0.360549	1.53416	-0.038153	0.109647	1.02445	0.641323	0.365315	0.276009
F5H6C5	F5H6C5	Uncharacterized protein OS=Homo sapiens GN=DDB1 PE=4 SV=1	0.3562	0.367007	0.67622	0.314212	0.606881	0.841004	0.466475	0.587366	-0.120891
F5H6D5	F5H6D5	Uncharacterized protein OS=Homo sapiens GN=CDH13 PE=4 SV=1		0.590042	-0.0728549		0.400299	-0.0893524	0.258593	0.155473	0.10312
F5H6E2	F5H6E2	Uncharacterized protein OS=Homo sapiens GN=MYO1C PE=4 SV=1	0.184043	0.666761	0.203535	2.09846	0.753579	0.228151	0.351447	1.02673	-0.675284
F5H6G5	F5H6G5	Uncharacterized protein OS=Homo sapiens GN=KRT6B PE=3 SV=1	-0.58538	-0.653601	2.22891	1.90396	-0.48662	-1.21467	0.329976	0.0675581	0.262418
F5H6I5	F5H6I5	Uncharacterized protein OS=Homo sapiens GN=RPN1 PE=4 SV=1	0.55822	0.326102	0.920258	-0.514858	-0.672701	0.00738462	0.601527	-0.393392	0.994918
F5H6K9	F5H6K9	Uncharacterized protein OS=Homo sapiens GN=CALU PE=4 SV=1	0.404648	0.430908	0.756986	1.21957	0.731316	0.875255	0.530847	0.942047	-0.4112
F5H6N3	F5H6N3	Uncharacterized protein OS=Homo sapiens GN=CLTA PE=4 SV=1	0.18746	0.0793918	0.690163	0.486902	0.305113	0.607564	0.319005	0.466526	-0.147521
F5H6N5	F5H6N5	Uncharacterized protein OS=Homo sapiens PE=4 SV=1	0.193309	0.430644	0.48247	0.357846	-0.498774	0.667867	0.368808	0.175647	0.193161
F5H6P0	F5H6P0	Uncharacterized protein OS=Homo sapiens GN=TGM2 PE=3 SV=1	1.35926	-0.262172	-0.505099	1.36323	0.859215	1.08334	0.19733	1.10193	-0.904596
F5H6T1	F5H6T1	Uncharacterized protein OS=Homo sapiens GN=ACTR2 PE=3 SV=1	0.433298	-0.20104	-0.450736	0.169753	0.117442	0.0470862	-0.0728258	0.111427	-0.184253
F5H6U8	F5H6U8	Uncharacterized protein OS=Homo sapiens GN=NPEPPS PE=4 SV=1	0.578716	0.726568	0.423572	1.40155	0.398363	1.88709	0.576286	1.229	-0.652715
F5H6W8	F5H6W8	Uncharacterized protein OS=Homo sapiens GN=LDHA PE=3 SV=1	1.37389	0.515843	-0.34788	0.817821	-1.64322	0.764874	0.51395	-0.0201747	0.534124
F5H6X2	F5H6X2	Uncharacterized protein OS=Homo sapiens GN=MGST1 PE=4 SV=1	0.886852	0.706458	0.588114	-0.75178	-1.07828	-0.783009	0.727142	-0.871024	1.59817
F5H6X6	F5H6X6	Uncharacterized protein OS=Homo sapiens GN=GANAB PE=4 SV=1	-0.174035	0.0963924	0.508869	0.716673	0.683624	0.223505	0.143742	0.541267	-0.397525
F5H6Z3	F5H6Z3	Adenylyl cyclase-associated protein OS=Homo sapiens GN=CAP1 PE=3 SV=1	0.994018	0.540079	0.113125	0.60833	-0.00297166	0.858044	0.549074	0.487801	0.0612732
F5H737	F5H737	Adenosylhomocysteinase OS=Homo sapiens GN=AHCY PE=3 SV=1	0.620044	0.969352	0.362305	0.404669	0.46249	-0.110479	0.650567	0.252227	0.39834
F5H780	F5H780	Uncharacterized protein OS=Homo sapiens GN=TXNRD1 PE=3 SV=1	1.44245	1.06603	1.18995	1.71119	1.0599	1.35826	1.23281	1.37645	-0.14364
F5H793	F5H793	Uncharacterized protein OS=Homo sapiens GN=LDHB PE=3 SV=1	1.1818	0.482541	0.0527028	0.436982	-0.434002	0.478673	0.572349	0.160551	0.411798
F5H7A1	F5H7A1	Uncharacterized protein OS=Homo sapiens GN=IQGAP1 PE=4 SV=1	0.332286	0.68361	0.590941	-0.0823565	0.0384045	0.739413	0.535612	0.23182	0.303792
F5H7F6	F5H7F6	Uncharacterized protein OS=Homo sapiens GN=MGST1 PE=4 SV=1	0.886852	0.706458	0.588114	-0.75178	-1.07828	-0.783009	0.727142	-0.871024	1.59817
F5H7G7	F5H7G7	Uncharacterized protein OS=Homo sapiens GN=PPM1G PE=3 SV=1	0.21827	0.0815329		-0.0395417	-0.305551		0.149901	-0.172546	0.322448
F5H7H0	F5H7H0	Uncharacterized protein OS=Homo sapiens GN=GSTO1 PE=3 SV=1	1.01232	-0.665075	0.519276	0.847794	1.60636	-0.322055	0.288841	0.7107	-0.421859
F5H7N9	F5H7N9	Uncharacterized protein OS=Homo sapiens GN=MFGE8 PE=4 SV=1	0.147653	0.556043	0.796047	0.739684	0.432708	-0.00531646	0.499914	0.389025	0.110889
F5H7S3	F5H7S3	Uncharacterized protein OS=Homo sapiens GN=TPM1 PE=3 SV=1	0.316192	0.299983	-0.223292	0.611795	0.793039	0.475247	0.130961	0.626694	-0.495733
F5H7T3	F5H7T3	Uncharacterized protein OS=Homo sapiens GN=VCL PE=4 SV=1	0.586668	0.70765	0.0766576	0.354016	-0.268159	0.518179	0.456992	0.201346	0.255646
F5H7U0	F5H7U0	6-phosphogluconate dehydrogenase, decarboxylating OS=Homo sapiens GN=PGD PE=3 SV=1	1.55413	0.972057	0.564904	0.395001	0.119276	-0.0344524	1.03037	0.159941	0.870424
F5H7V3	F5H7V3	Uncharacterized protein OS=Homo sapiens PE=4 SV=1	0.193309	0.430644	0.48247	0.357846	-0.498774	0.667867	0.368808	0.175647	0.193161
F5H7X1	F5H7X1	Uncharacterized protein OS=Homo sapiens GN=PSMD9 PE=4 SV=1	0.923018	0.978384	-0.828495	0.491978	-2.27226	-0.158572	0.357636	-0.646286	1.00392
F5H7Y0	F5H7Y0	Uncharacterized protein OS=Homo sapiens GN=PDLIM5 PE=4 SV=1	-0.140078	-0.277025	0.446	-1.58066	1.45221	0.559549	0.00963249	0.143701	-0.134069
F5H7Y6	F5H7Y6	Uncharacterized protein OS=Homo sapiens GN=RAP1B PE=4 SV=1		1.58195	1.57654		1.67459	0.809911	1.57924	1.24225	0.336993
F5H801	F5H801	Uncharacterized protein OS=Homo sapiens GN=OGDH PE=4 SV=1	0.374923	0.811056	0.826269	0.136384	0.17184	0.351454	0.670749	0.219893	0.450857
F5H816	F5H816	Phosphorylase OS=Homo sapiens GN=PYGL PE=3 SV=1	1.47794	-1.18547	-0.370948	0.0425603	-1.87357	0.185885	-0.0261572	-0.548375	0.522217
F5H826	F5H826	Uncharacterized protein OS=Homo sapiens GN=NOMO3 PE=4 SV=1	0.580881	0.100104	0.407855	0.452424	-0.15272	-0.281834	0.362947	0.00595657	0.35699
F5H857	F5H857	Uncharacterized protein OS=Homo sapiens GN=PGM1 PE=3 SV=1	1.18746	0.0573286	0.0134531	0.56744	-0.177919	0.445853	0.419415	0.278458	0.140957
F5H871	F5H871	Uncharacterized protein OS=Homo sapiens GN=FAM21C PE=4 SV=1	0.304454	0.0177841	0.485236	0.443356	-0.232379	1.01501	0.269158	0.408663	-0.139505
F5H879	F5H879	Uncharacterized protein OS=Homo sapiens GN=CALU PE=4 SV=1	0.0449012	0.679202	0.449902	0.543477	0.676041	0.875255	0.391335	0.698258	-0.306923
F5H894	F5H894	Uncharacterized protein OS=Homo sapiens GN=TUBB PE=3 SV=1	1.52507	0.516443	0.455492	0.671838	0.201142	1.01633	0.832334	0.629769	0.202566
F5H8C9	F5H8C9	Uncharacterized protein OS=Homo sapiens GN=TUBB2A PE=3 SV=1	1.20888	0.646336	0.447063	0.6229	0.191658	1.08577	0.767426	0.633443	0.133983
F5H8F5	F5H8F5	Uncharacterized protein OS=Homo sapiens PE=4 SV=1	0.193309	0.430644	0.48247	0.357846	-0.498774	0.667867	0.368808	0.175647	0.193161
F5H8J2	F5H8J2	Uncharacterized protein OS=Homo sapiens GN=P4HB PE=3 SV=1	7.17345	7.25645	4.42267	7.74631	7.69316	4.6889	6.28419	6.70946	-0.425266
F5H8J8	F5H8J8	Uncharacterized protein OS=Homo sapiens GN=GNB3 PE=4 SV=1		1.81899	1.54969		2.49401	1.06652	1.68434	1.78027	-0.0959289
F5H8K4	F5H8K4	Uncharacterized protein OS=Homo sapiens GN=PSMD3 PE=4 SV=1	1.03424	0.618773	0.314273	0.0676789	-0.649997	0.518146	0.655762	-0.0213907	0.677153
F5H8L6	F5H8L6	Uncharacterized protein OS=Homo sapiens GN=DPP3 PE=4 SV=1	0.968293	-0.0879564	0.0390528	0.259926	0.0730963	1.16835	0.306463	0.500458	-0.193995
F5H8M4	F5H8M4	Uncharacterized protein OS=Homo sapiens GN=GSN PE=4 SV=1	0.967494	0.465372	0.134875	0.667324	0.084136	0.582161	0.52258	0.44454	0.07804
F5HB16	F5HB16	Uncharacterized protein OS=Homo sapiens GN=ADH1B PE=2 SV=1	0.904748	-0.215596	0.335063	-1.20696	-0.964903	-1.16561	0.341405	-1.11249	1.4539
F5HE57	F5HE57	Uncharacterized protein OS=Homo sapiens GN=HSD17B4 PE=3 SV=1	0.400632	0.461984	1.15352	-0.6006	-0.0694147	-1.02577	0.672044	-0.56526	1.2373
F5HGG6	F5HGG6	Uncharacterized protein OS=Homo sapiens GN=CTSC PE=2 SV=1	-0.324509	0.703374	0.319216	0.224704	0.374252	0.262432	0.232693	0.287129	-0.054436
F6RFD5	F6RFD5	Uncharacterized protein OS=Homo sapiens GN=DSTN PE=4 SV=1	1.12159		-0.0843004	1.69313		-0.127451	0.518646	0.782839	-0.264192
F6S8M0	F6S8M0	Uncharacterized protein OS=Homo sapiens GN=GNS PE=4 SV=1	-0.0157573	0.0616033	0.662687	0.739373	1.52715	0.229211	0.236178	0.83191	-0.595732
F6USW4	F6USW4	Uncharacterized protein OS=Homo sapiens GN=CAPZB PE=4 SV=1	1.01868	0.65879	0.146389	0.536131	0.703731	0.207209	0.607952	0.482357	0.125595
F6UVQ4	F6UVQ4	Uncharacterized protein OS=Homo sapiens GN=ACTA2 PE=3 SV=1	0.297599	0.119146	0.667258	0.631262	1.25225	0.374482	0.361334	0.752665	-0.391331
F6UXX1	F6UXX1	Uncharacterized protein OS=Homo sapiens GN=SYNCRIP PE=4 SV=1	0.210234	0.491751	0.701195	0.35514	0.548541	0.64272	0.467727	0.515467	-0.0477406
F6VDH7	F6VDH7	Uncharacterized protein OS=Homo sapiens GN=ST13 PE=4 SV=1	1.03929	0.329484	0.272714	0.370796	0.3358	-0.0750678	0.547162	0.21051	0.336652
F6Y097	F6Y097	Uncharacterized protein OS=Homo sapiens GN=NCSTN PE=4 SV=1	0.245261	0.475296	0.99708	0.311383	0.129589	1.74381	0.572546	0.728262	-0.155716
F8VNW4	F8VNW4	Uncharacterized protein OS=Homo sapiens GN=NACA PE=4 SV=1	0.919043	0.805276	0.0838561	0.129604	-0.0213245	0.243653	0.602725	0.117311	0.485414
F8VP03	F8VP03	Uncharacterized protein OS=Homo sapiens PE=4 SV=1	0.225067	0.626908	0.605279	0.670732	0.161419	0.668942	0.485751	0.500364	-0.0146129
F8VP50	F8VP50	Uncharacterized protein OS=Homo sapiens PE=4 SV=1	0.453519	0.27482	0.823298	-0.154647	0.130171	0.667879	0.517212	0.214468	0.302744
F8VPA1	F8VPA1	Uncharacterized protein OS=Homo sapiens GN=CS PE=4 SV=1	0.347401	0.646042	0.815353	0.0995263	0.289322	-0.0997058	0.602932	0.0963808	0.506551
F8VPF3	F8VPF3	Uncharacterized protein OS=Homo sapiens GN=MYL6 PE=4 SV=1	0.0413985	-0.00664696	0.197709	0.869707	1.34953	0.298682	0.0774869	0.839307	-0.76182
F8VPF9	F8VPF9	Uncharacterized protein OS=Homo sapiens GN=CS PE=4 SV=1	0.347401	0.646042	0.815353	0.0995263	0.289322	-0.0997058	0.602932	0.0963808	0.506551
F8VPV9	F8VPV9	ATP synthase subunit beta OS=Homo sapiens GN=ATP5B PE=3 SV=1	0.463023	0.121	1.24264	0.789068	0.950904	0.586373	0.608886	0.775448	-0.166562
F8VQ14	F8VQ14	Uncharacterized protein OS=Homo sapiens GN=CCT2 PE=3 SV=1	0.884678	0.608049	1.23402	-0.117687	-0.493318	0.926736	0.908915	0.105244	0.803671
F8VQE1	F8VQE1	Uncharacterized protein OS=Homo sapiens GN=LIMA1 PE=4 SV=1	0.182286	0.706458	0.633459	0.609734	0.0894087	0.764197	0.507401	0.48778	0.0196211
F8VQQ4	F8VQQ4	Uncharacterized protein OS=Homo sapiens GN=TUBA1A PE=3 SV=1	1.20165	0.625142	0.182183	0.604687	-0.594894	1.25626	0.669657	0.422016	0.247641
F8VQR7	F8VQR7	Uncharacterized protein OS=Homo sapiens GN=CSRP2 PE=4 SV=1	0.654573	0.300112	0.0862495	-0.526126	0.124914	0.419162	0.346978	0.00598345	0.340995
F8VQX6	F8VQX6	Uncharacterized protein OS=Homo sapiens GN=METTL7A PE=4 SV=1		1.30102	1.73787		-0.340361	-0.0375235	1.51945	-0.188942	1.70839
F8VQY0	F8VQY0	Uncharacterized protein OS=Homo sapiens GN=ATP5B PE=4 SV=1	1.75926	-0.117647	1.32922	2.62817	-0.272267	1.30717	0.990279	1.22103	-0.230747
F8VQY6	F8VQY6	Uncharacterized protein OS=Homo sapiens GN=RPLP0 PE=3 SV=1	0.458226	0.392349	0.424761	-0.591924	-0.536551	-0.0685021	0.425112	-0.398992	0.824104
F8VR50	F8VR50	Uncharacterized protein OS=Homo sapiens GN=ARPC3 PE=4 SV=1	1.21486	0.659727	0.591619	1.3412	0.375194	1.85211	0.82207	1.1895	-0.367431
F8VRK0	F8VRK0	Uncharacterized protein OS=Homo sapiens GN=TUBA1B PE=4 SV=1	1.20165	0.731423	0.182183	0.604687	-0.777603	0.733919	0.705084	0.187001	0.518083
F8VRK7	F8VRK7	Uncharacterized protein OS=Homo sapiens GN=RPLP0 PE=3 SV=1	0.458226	0.392349	0.424761	-0.591924	-0.536551	-0.0685021	0.425112	-0.398992	0.824104
F8VRP1	F8VRP1	Uncharacterized protein OS=Homo sapiens GN=CS PE=4 SV=1	0.347401	0.646042	0.815353	0.0995263	0.289322	-0.0997058	0.602932	0.0963808	0.506551
F8VRQ1	F8VRQ1	Uncharacterized protein OS=Homo sapiens GN=HNRNPA1 PE=4 SV=1	0.193596	0.354551	0.369082	0.66773	1.38303	0.574682	0.305743	0.875147	-0.569405
F8VRZ4	F8VRZ4	Uncharacterized protein OS=Homo sapiens GN=TUBA1A PE=4 SV=1	1.20165	0.731423	0.182183	0.604687	-0.777603	1.25626	0.705084	0.361113	0.343971
F8VS02	F8VS02	Uncharacterized protein OS=Homo sapiens GN=ALDH7A1 PE=3 SV=1	0.420781	0.833319	0.788226	0.317685	0.462978	-0.424999	0.680775	0.118555	0.562221
F8VS07	F8VS07	Uncharacterized protein OS=Homo sapiens GN=LIMA1 PE=4 SV=1	0.182286	0.706458	0.633459	0.609734	0.0894087	0.764197	0.507401	0.48778	0.0196211
F8VS66	F8VS66	Uncharacterized protein OS=Homo sapiens GN=TUBA1C PE=4 SV=1	1.20165	0.731423	0.182183	0.604687	-0.777603	1.25626	0.705084	0.361113	0.343971
F8VSB5	F8VSB5	Uncharacterized protein OS=Homo sapiens GN=HNRNPA1 PE=4 SV=1	0.134166		0.369082	0.655287		0.574682	0.251624	0.614985	-0.363361
F8VTL3	F8VTL3	Uncharacterized protein OS=Homo sapiens GN=MYH10 PE=4 SV=1	0.808246	0.831801	0.646232	0.858479	1.03788	0.688615	0.762093	0.861659	-0.0995661
F8VTT8	F8VTT8	Uncharacterized protein OS=Homo sapiens GN=CS PE=4 SV=1	0.347401	0.646042	0.815353	0.0995263	0.289322	-0.0997058	0.602932	0.0963808	0.506551
F8VU65	F8VU65	Uncharacterized protein OS=Homo sapiens GN=RPLP0 PE=3 SV=1	0.458226	0.392349	0.424761	-0.591924	-0.536551	-0.0685021	0.425112	-0.398992	0.824104
F8VU71	F8VU71	Uncharacterized protein OS=Homo sapiens GN=NACA PE=4 SV=1	0.919043	0.805276	0.0838561	0.129604	-0.0213245	0.243653	0.602725	0.117311	0.485414
F8VUA6	F8VUA6	Uncharacterized protein OS=Homo sapiens GN=RPL18 PE=4 SV=1	0.376291	0.646547	0.717671	-0.252051	0.200709	0.62134	0.58017	0.19	0.39017
F8VUJ7	F8VUJ7	Uncharacterized protein OS=Homo sapiens GN=TUBB PE=3 SV=1	1.2082	0.664075	0.463212	0.974334	0.411881	1.08878	0.778496	0.824999	-0.0465025
F8VVB9	F8VVB9	Uncharacterized protein OS=Homo sapiens GN=TUBA1B PE=4 SV=1	1.20165	0.731423	0.182183	0.604687	-0.777603	1.25626	0.705084	0.361113	0.343971
F8VVR9	F8VVR9	Uncharacterized protein OS=Homo sapiens GN=GPD1 PE=4 SV=1	1.28305	0.591129	0.844425	-1.24743	-1.7335	-2.17779	0.906201	-1.71957	2.62577
F8VW92	F8VW92	Uncharacterized protein OS=Homo sapiens GN=TUBB PE=3 SV=1	1.67224	1.29714	1.18126	1.54682	0.956073	1.61103	1.38355	1.37131	0.0122377
F8VW96	F8VW96	Uncharacterized protein OS=Homo sapiens GN=CSRP2 PE=4 SV=1	0.654573	0.443955	0.0862495	-0.526126	-0.509748	0.373878	0.394926	-0.220665	0.615591
F8VWB4	F8VWB4	Uncharacterized protein OS=Homo sapiens GN=PPP1R12A PE=4 SV=1	-0.0433303	-0.0816372	0.111379	0.228997	-0.0410439	0.583807	-0.0045296	0.257253	-0.261783
F8VWC5	F8VWC5	Ribosomal protein L18 OS=Homo sapiens GN=RPL18 PE=3 SV=1	0.376291	0.646547	0.717671	-0.252051	0.200709	0.62134	0.58017	0.19	0.39017
F8VWS0	F8VWS0	Uncharacterized protein OS=Homo sapiens GN=RPLP0 PE=3 SV=1	0.458226	0.392349	0.424761	-0.591924	-0.536551	-0.0685021	0.425112	-0.398992	0.824104
F8VWV9	F8VWV9	Uncharacterized protein OS=Homo sapiens GN=TUBA1B PE=4 SV=1	1.20165	0.731423	0.205265	0.604687	-0.777603	0.753967	0.712778	0.193684	0.519095
F8VWX4	F8VWX4	Uncharacterized protein OS=Homo sapiens GN=TUBA1A PE=4 SV=1	1.19354	0.484864	0.00345826	0.581524	-1.10059	0.625513	0.560621	0.035482	0.525139
F8VX07	F8VX07	Uncharacterized protein OS=Homo sapiens GN=CS PE=4 SV=1	0.347401	0.646042	0.815353	0.0995263	0.289322	-0.0997058	0.602932	0.0963808	0.506551
F8VX09	F8VX09	Uncharacterized protein OS=Homo sapiens GN=TUBA1B PE=4 SV=1	1.20165	0.731423	0.205265	0.604687	-0.777603	0.753967	0.712778	0.193684	0.519095
F8VX11	F8VX11	Uncharacterized protein OS=Homo sapiens GN=EIF4B PE=4 SV=1	0.853459	0.797009	0.303784	0.833522	0.759011	0.583263	0.651418	0.725265	-0.0738477
F8VX68	F8VX68	Uncharacterized protein OS=Homo sapiens GN=CS PE=4 SV=1	0.347401	0.646042	0.815353	0.0995263	0.289322	-0.0997058	0.602932	0.0963808	0.506551
F8VXI5	F8VXI5	Uncharacterized protein OS=Homo sapiens GN=ALDH2 PE=3 SV=1	0.262777	0.373041	1.07492	-0.187492	0.00659948	-0.870197	0.570247	-0.350363	0.920611
F8VXJ7	F8VXJ7	Uncharacterized protein OS=Homo sapiens GN=CNPY2 PE=4 SV=1	0.117759	0.467186	0.582312	0.573924	0.469044	0.468387	0.389086	0.503785	-0.114699
F8VXU5	F8VXU5	Uncharacterized protein OS=Homo sapiens GN=VPS29 PE=4 SV=1	1.15993	-0.0608576	-0.366168	0.645381	0.61763	-0.195481	0.244303	0.355843	-0.11154
F8VXY0	F8VXY0	Uncharacterized protein OS=Homo sapiens GN=HNRNPA1 PE=4 SV=1	0.193596	0.354551	0.369082	0.66773	1.38303	0.574682	0.305743	0.875147	-0.569405
F8VXZ4	F8VXZ4	Uncharacterized protein OS=Homo sapiens GN=TUBA1A PE=4 SV=1	1.17884	0.367011	-0.235247	0.512438	-0.054364	0.500255	0.436867	0.319443	0.117424
F8VY02	F8VY02	Uncharacterized protein OS=Homo sapiens GN=ERP29 PE=4 SV=1	0.149318	0.467143	1.07134	0.431632	1.64658	0.463687	0.562601	0.847299	-0.284698
F8VY04	F8VY04	Uncharacterized protein OS=Homo sapiens GN=AK2 PE=3 SV=1	0.0348532	1.00209	1.36484	0.485629	0.483815	0.724484	0.800596	0.564643	0.235953
F8VYX6	F8VYX6	Uncharacterized protein OS=Homo sapiens GN=TUBB PE=3 SV=1	1.67224	1.29714	1.18126	1.54682	0.956073	1.61103	1.38355	1.37131	0.0122377
F8VZG5	F8VZG5	Uncharacterized protein OS=Homo sapiens GN=AK2 PE=3 SV=1	0.486169	0.548078	1.03415	-0.919626	-0.679837	-0.290777	0.689466	-0.63008	1.31955
F8VZJ2	F8VZJ2	Uncharacterized protein OS=Homo sapiens GN=NACA PE=4 SV=1	0.919043	0.805276	0.0838561	0.129604	-0.0213245	0.243653	0.602725	0.117311	0.485414
F8VZJ4	F8VZJ4	Uncharacterized protein OS=Homo sapiens GN=HSPA1B PE=3 SV=1	0.580505	0.845883	0.502726	0.330586	0.500425	0.832236	0.643038	0.554416	0.0886224
F8VZK9	F8VZK9	Uncharacterized protein OS=Homo sapiens GN=CS PE=4 SV=1	0.347401	0.646042	0.815353	0.0995263	0.289322	-0.0997058	0.602932	0.0963808	0.506551
F8VZN8	F8VZN8	Uncharacterized protein OS=Homo sapiens GN=PPP1R12A PE=4 SV=1	-0.0335231	0.0081479	0.111379	0.430963	-0.343343	0.583807	0.0286678	0.223809	-0.195141
F8VZU9	F8VZU9	Uncharacterized protein OS=Homo sapiens GN=MYL6 PE=4 SV=1	-0.169165	-0.279613	0.027584	0.718021	0.687978	0.764356	-0.140398	0.723451	-0.863849
F8VZV5	F8VZV5	Uncharacterized protein OS=Homo sapiens GN=MYL6 PE=4 SV=1	0.311641	0.0686708	0.235111	0.928197	1.4445	0.448775	0.205141	0.94049	-0.735349
F8VZY5	F8VZY5	Uncharacterized protein OS=Homo sapiens GN=KRT7 PE=4 SV=1	0.242268	0.816476	0.323424	0.297135	0.014	0.551752	0.460723	0.287629	0.173093
F8VZY9	F8VZY9	Uncharacterized protein OS=Homo sapiens GN=KRT18 PE=3 SV=1	0.276177	0.424522	0.670019	0.148182	-0.386061	-0.0385371	0.456906	-0.0921388	0.549045
F8W026	F8W026	Uncharacterized protein OS=Homo sapiens GN=HSP90B1 PE=4 SV=1	0.627089	0.28635	0.121755	0.000297165	-0.509854	0.321408	0.345065	-0.0627165	0.407781
F8W031	F8W031	Uncharacterized protein OS=Homo sapiens PE=4 SV=1	0.117759	0.467186	0.582312	0.573924	0.469044	0.468387	0.389086	0.503785	-0.114699
F8W079	F8W079	Uncharacterized protein OS=Homo sapiens GN=ATP5B PE=3 SV=1	0.332731	0.254609	0.974488	0.747387	1.33781	0.226233	0.52061	0.770475	-0.249866
F8W0A9	F8W0A9	Uncharacterized protein OS=Homo sapiens GN=ALDH2 PE=3 SV=1	0.326009	0.612368	1.00223	0.0266132	0.253743	-0.642469	0.646868	-0.120704	0.767572
F8W0P7	F8W0P7	Uncharacterized protein OS=Homo sapiens GN=ATP5B PE=3 SV=1	0.193855	0.46314	0.9364	1.08063	1.20939	1.25855	0.531132	1.18286	-0.651725
F8W0W4	F8W0W4	Uncharacterized protein OS=Homo sapiens GN=NACA PE=4 SV=1	0.919043	0.805276	0.0838561	0.129604	-0.0213245	0.243653	0.602725	0.117311	0.485414
F8W180	F8W180	Uncharacterized protein OS=Homo sapiens GN=MYL6 PE=4 SV=1	-0.169165	-0.279613	0.027584	0.718021	0.687978	0.764356	-0.140398	0.723451	-0.863849
F8W181	F8W181	60S ribosomal protein L6 OS=Homo sapiens GN=RPL6 PE=3 SV=1	0.606708	0.626655	0.992292	0.0635264	0.81074	-0.334263	0.741885	0.180001	0.561884
F8W1A4	F8W1A4	Uncharacterized protein OS=Homo sapiens GN=AK2 PE=3 SV=1	0.260511	0.587938	1.36484	-0.216998	0.316991	0.724484	0.737764	0.274825	0.462939
F8W1I5	F8W1I5	Uncharacterized protein OS=Homo sapiens GN=MYL6B PE=4 SV=1	0.0413985	-0.0162851	0.313673	0.905112	1.35031	0.277023	0.112929	0.844149	-0.731221
F8W1I6	F8W1I6	Uncharacterized protein OS=Homo sapiens GN=DCTN2 PE=4 SV=1	0.473639	0.459277	0.0650159	0.285138	0.255326	0.743057	0.332644	0.42784	-0.0951962
F8W1K5	F8W1K5	Uncharacterized protein OS=Homo sapiens GN=CNPY2 PE=4 SV=1	0.31891	0.639771	0.637918	0.691492	0.849759	0.815072	0.532199	0.785441	-0.253242
F8W1L5	F8W1L5	Uncharacterized protein OS=Homo sapiens GN=GPD1 PE=3 SV=1	1.28305	0.591129	0.844425	-1.24743	-1.7335	-2.17779	0.906201	-1.71957	2.62577
F8W1N5	F8W1N5	Uncharacterized protein OS=Homo sapiens GN=NACA PE=4 SV=1	0.919043	0.805276	0.0838561	0.129604	-0.0213245	0.243653	0.602725	0.117311	0.485414
F8W1P1	F8W1P1	Uncharacterized protein OS=Homo sapiens GN=HSPA1L PE=3 SV=1	0.476881	0.932431	0.519708	0.631544	0.520305	0.477298	0.643007	0.543049	0.0999577
F8W1R7	F8W1R7	Uncharacterized protein OS=Homo sapiens GN=MYL6 PE=4 SV=1	0.259178	0.0686708	0.235111	0.927415	1.4445	0.448775	0.187653	0.940229	-0.752576
F8W1S4	F8W1S4	Uncharacterized protein OS=Homo sapiens GN=CS PE=4 SV=1	0.347401	0.646042	0.815353	0.0995263	0.289322	-0.0997058	0.602932	0.0963808	0.506551
F8W1S7	F8W1S7	Uncharacterized protein OS=Homo sapiens GN=HNRNPA1 PE=4 SV=1	0.134166		0.369082	0.655287		0.574682	0.251624	0.614985	-0.363361
F8W1U5	F8W1U5	Uncharacterized protein OS=Homo sapiens PE=4 SV=1	0.225067	0.626908	0.605279	0.670732	0.161419	0.668942	0.485751	0.500364	-0.0146129
F8W4S1	F8W4S1	Uncharacterized protein OS=Homo sapiens GN=CS PE=4 SV=1	0.347401	0.646042	0.815353	0.0995263	0.289322	-0.0997058	0.602932	0.0963808	0.506551
F8W642	F8W642	Uncharacterized protein OS=Homo sapiens GN=CS PE=4 SV=1	0.347401	0.646042	0.815353	0.0995263	0.289322	-0.0997058	0.602932	0.0963808	0.506551
F8W6I0	F8W6I0	Elongation factor 1-alpha OS=Homo sapiens GN=EEF1A1 PE=3 SV=1	0.92351	0.377936	0.308429	-0.280547	-0.0866234	0.145635	0.536625	-0.0738452	0.61047
F8W6I7	F8W6I7	Uncharacterized protein OS=Homo sapiens GN=HNRNPA1 PE=4 SV=1	0.193596	0.354551	0.369082	0.66773	1.38303	0.574682	0.305743	0.875147	-0.569405
F8W6L6	F8W6L6	Uncharacterized protein OS=Homo sapiens GN=MYH10 PE=4 SV=1	0.808246	0.831801	0.646232	0.858479	1.03788	0.688615	0.762093	0.861659	-0.0995661
F8W6Z6	F8W6Z6	Uncharacterized protein OS=Homo sapiens GN=PSAP PE=4 SV=1	1.81606	3.25298	3.38768	2.37394	2.89005	2.99837	2.81891	2.75412	0.064787
F8W713	F8W713	Uncharacterized protein OS=Homo sapiens GN=NLN PE=3 SV=1	0.654892	0.168597	0.187805	0.433683	-0.639638	-0.215035	0.337098	-0.14033	0.477428
F8W726	F8W726	Uncharacterized protein OS=Homo sapiens GN=UBAP2L PE=4 SV=1	0.292666	0.629107	0.385699		1.48692	0.332788	0.435824	0.909853	-0.474029
F8W787	F8W787	Uncharacterized protein OS=Homo sapiens GN=CTSD PE=3 SV=1	0.370261	0.332179	1.15121	1.12991	1.51772	1.40092	0.617884	1.34952	-0.731633
F8W7G7	F8W7G7	Uncharacterized protein OS=Homo sapiens GN=FN1 PE=4 SV=1	-0.0923144	-0.570212	0.173829	0.00398594	-0.124788	0.590271	-0.162899	0.156489	-0.319389
F8W7K3	F8W7K3	Uncharacterized protein OS=Homo sapiens GN=SPTAN1 PE=4 SV=1	1.46951	1.30371	1.20155	1.79468	0.99029	1.69811	1.32492	1.49436	-0.169436
F8W7L2	F8W7L2	Uncharacterized protein OS=Homo sapiens GN=FBN1 PE=4 SV=1	0.116915	0.520107	1.03593	0.141135	-0.0858435	-0.307446	0.557651	-0.0840517	0.641702
F8W7P1	F8W7P1	Uncharacterized protein OS=Homo sapiens GN=PPP1R12A PE=4 SV=1	-0.0335231	-0.0816372	0.111379	0.430963	-0.0410439	0.583807	-0.00126052	0.324575	-0.325836
F8W7S5	F8W7S5	Uncharacterized protein OS=Homo sapiens GN=RRBP1 PE=4 SV=1	-0.0553464	0.417787	0.595538	0.458031	1.19182	0.498339	0.319326	0.716062	-0.396735
F8W7U3	F8W7U3	Uncharacterized protein OS=Homo sapiens GN=FAM21A PE=4 SV=1	0.304454	0.0177841	0.485236	0.443356	-0.232379	1.01501	0.269158	0.408663	-0.139505
F8W7V8	F8W7V8	Uncharacterized protein OS=Homo sapiens GN=PSMD9 PE=4 SV=1	0.923018	0.978384	-0.828495	0.491978	-2.27226	-0.158572	0.357636	-0.646286	1.00392
F8W813	F8W813	Uncharacterized protein OS=Homo sapiens PE=4 SV=1	1.63534	0.760058	1.57055	1.12039	1.56951	1.44288	1.32198	1.3776	-0.0556135
F8W819	F8W819	L-lactate dehydrogenase OS=Homo sapiens GN=LDHA PE=3 SV=1	1.46494	0.711111	0.201841	1.31934	1.10645	0.974503	0.79263	1.13343	-0.340803
F8W888	F8W888	Uncharacterized protein OS=Homo sapiens GN=TKT PE=4 SV=1	0.451718	0.0916872	0.578902	0.53728	0.728527	-0.0832848	0.374103	0.394174	-0.0200715
F8W8D8	F8W8D8	Uncharacterized protein OS=Homo sapiens GN=PLS3 PE=4 SV=1	0.738187	0.1657	-0.243363	0.241664	-0.0229525	0.53111	0.220175	0.24994	-0.0297656
F8W8J4	F8W8J4	Uncharacterized protein OS=Homo sapiens GN=MYOF PE=4 SV=1	0.145967	0.901734	0.692089	-0.0888792	-0.0153982	-0.26546	0.57993	-0.123246	0.703176
F8W8N3	F8W8N3	Uncharacterized protein OS=Homo sapiens GN=SKP1 PE=4 SV=1	0.652012	0.617407	0.610673	0.222828	-0.13271	0.470854	0.626697	0.186991	0.439707
F8W8Q6	F8W8Q6	Uncharacterized protein OS=Homo sapiens GN=PPP1R12A PE=4 SV=1	-0.0335231	-0.0816372	0.111379	0.430963	-0.0410439	0.583807	-0.00126052	0.324575	-0.325836
F8W8W4	F8W8W4	Uncharacterized protein OS=Homo sapiens GN=PCYOX1 PE=4 SV=1	0.509823	1.34724	1.17706	-0.0978558	1.01938	0.384491	1.01137	0.435337	0.576037
F8W934	F8W934	Uncharacterized protein OS=Homo sapiens GN=EEF1D PE=3 SV=1	0.451657	0.982312	0.466604	0.431935	1.41202	0.084206	0.633524	0.642719	-0.00919434
F8W9D6	F8W9D6	Adenylosuccinate synthetase OS=Homo sapiens GN=ADSS PE=3 SV=1	1.35412	0.344262	-0.186743	1.83929	0.265191	0.879571	0.503878	0.994686	-0.490807
F8W9E8	F8W9E8	Uncharacterized protein OS=Homo sapiens GN=PPP1R12A PE=4 SV=1	-0.0335231	0.0081479	0.111379	0.430963	-0.343343	0.583807	0.0286678	0.223809	-0.195141
F8W9I1	F8W9I1	Uncharacterized protein OS=Homo sapiens GN=IMMT PE=4 SV=1	0.108684	0.821467	0.663856	-0.307073	-0.063926	-0.224852	0.531335	-0.198617	0.729952
F8W9U4	F8W9U4	Microtubule-associated protein OS=Homo sapiens GN=MAP4 PE=4 SV=1	0.577926	0.101309	0.22226	0.17598	1.08101	0.0325285	0.300498	0.429838	-0.12934
F8W9Z3	F8W9Z3	Uncharacterized protein OS=Homo sapiens GN=DBN1 PE=4 SV=1	0.345438	0.111143	0.00183128	1.09225	-0.494077	1.0097	0.152804	0.535955	-0.383151
F8WA20	F8WA20	Uncharacterized protein OS=Homo sapiens GN=GLUD1 PE=3 SV=1	0.583549	0.520748	0.798884	0.555207	0.519117	0.0729127	0.634394	0.382412	0.251982
F8WA23	F8WA23	Uncharacterized protein OS=Homo sapiens GN=FKBP10 PE=4 SV=1	0.326856		0.361044	0.00564642		0.253274	0.34395	0.12946	0.21449
F8WA26	F8WA26	Uncharacterized protein OS=Homo sapiens GN=PALLD PE=4 SV=1	0.766339	0.961724	0.0456039	0.47885	-0.633599	0.922524	0.591222	0.255925	0.335297
F8WA45	F8WA45	Uncharacterized protein OS=Homo sapiens GN=GSN PE=4 SV=1	0.967494	0.465372	0.134875	0.667324	0.084136	0.582161	0.52258	0.44454	0.07804
F8WA65	F8WA65	Uncharacterized protein OS=Homo sapiens GN=TOM1 PE=4 SV=1	-0.795	0.0685163	-0.448037	0.52024	1.2422	0.321127	-0.391507	0.694523	-1.08603
F8WA83	F8WA83	Uncharacterized protein OS=Homo sapiens GN=PDIA6 PE=3 SV=1	0.619476	1.30495	0.943954	1.10573	0.717027	1.46305	0.956127	1.09527	-0.139144
F8WA86	F8WA86	Uncharacterized protein OS=Homo sapiens GN=CNN3 PE=4 SV=1	1.06905	0.210498	0.271196	0.906126	0.770221	0.224802	0.516914	0.633717	-0.116802
F8WAG8	F8WAG8	Uncharacterized protein OS=Homo sapiens GN=DCTN2 PE=4 SV=1	0.473639	0.459277	-0.147669	0.285138	0.255326	0.656351	0.261749	0.398938	-0.137189
F8WAM2	F8WAM2	Uncharacterized protein OS=Homo sapiens GN=CCT7 PE=3 SV=1	1.18316	0.549911	0.816934	0.336027	-0.0808977	-0.0628835	0.850002	0.0640818	0.78592
F8WAN1	F8WAN1	Uncharacterized protein OS=Homo sapiens GN=SPECC1L PE=4 SV=1	-0.2138	0.39683	0.443255	0.180456	0.171637	0.482616	0.208762	0.278236	-0.0694748
F8WAS3	F8WAS3	Uncharacterized protein OS=Homo sapiens GN=NDUFA5 PE=4 SV=1	0.254697	0.986868	0.404831	0.0130672	-0.143321	-0.633753	0.548799	-0.254669	0.803468
F8WB63	F8WB63	Uncharacterized protein OS=Homo sapiens GN=ACTG2 PE=3 SV=1	0.331882	0.233034	1.0641	0.469072	1.28403	0.305915	0.543004	0.686339	-0.143335
F8WBG8	F8WBG8	Uncharacterized protein OS=Homo sapiens GN=DBNL PE=4 SV=1	1.16633	0.342936	0.0520849	0.459988	-0.44307	0.482689	0.520451	0.166535	0.353915
F8WCC8	F8WCC8	Uncharacterized protein OS=Homo sapiens GN=ARSA PE=4 SV=1	-0.0244117	0.588988	0.656737	0.782133	0.929495	0.846395	0.407105	0.852675	-0.44557
F8WCH0	F8WCH0	Uncharacterized protein OS=Homo sapiens GN=ACTG2 PE=4 SV=1	-0.0355538	-0.0904202	1.15063	0.568762	1.35602	0.584048	0.341551	0.836275	-0.494725
F8WCY5	F8WCY5	Uncharacterized protein OS=Homo sapiens GN=RCN2 PE=4 SV=1	0.33677	0.474796	0.65333	0.407853	0.271365	0.616097	0.488299	0.431771	0.0565272
F8WD26	F8WD26	Uncharacterized protein OS=Homo sapiens GN=LMO7 PE=4 SV=1	-0.0728365	-0.22984	0.00596134	0.735631	1.58755	1.4689	-0.0989049	1.26403	-1.36293
F8WD96	F8WD96	Uncharacterized protein OS=Homo sapiens GN=CTSD PE=3 SV=1	0.377181	0.532113	1.15425	1.13157	1.52473	1.40092	0.687846	1.3524	-0.664558
F8WE04	F8WE04	Uncharacterized protein OS=Homo sapiens GN=HSPB1 PE=4 SV=1	1.22071	2.12999	2.66582	1.39039	2.883	3.41121	2.00551	2.56153	-0.556024
F8WE12	F8WE12	Uncharacterized protein OS=Homo sapiens GN=FKBP7 PE=3 SV=1	0.351326	0.487402	0.604551	0.292366	0.236104	0.838312	0.481093	0.455594	0.0254991
F8WE65	F8WE65	Peptidyl-prolyl cis-trans isomerase OS=Homo sapiens GN=PPIA PE=3 SV=1	0.696984	0.0251828	0.0736932	1.81212	1.02814	0.444875	0.265287	1.09505	-0.82976
F8WE98	F8WE98	Uncharacterized protein OS=Homo sapiens GN=FLNA PE=4 SV=1	1.24168	0.812876	0.687023	1.33981	0.432818	1.59095	0.913861	1.12119	-0.20733
F8WEC9	F8WEC9	Uncharacterized protein OS=Homo sapiens GN=COL4A1 PE=4 SV=1	4.76576	-0.41297	0.00586812	6.95865	-0.878143	-1.18366	1.45289	1.63228	-0.179397
F8WEE3	F8WEE3	Uncharacterized protein OS=Homo sapiens GN=HSPA1L PE=3 SV=1	0.476881	0.932431	0.571918	0.323428	0.520305	0.445764	0.66041	0.429832	0.230578
F8WF02	F8WF02	Uncharacterized protein OS=Homo sapiens GN=PDHB PE=4 SV=1	0.610128	0.5127	0.613991	0.483959	0.297713	0.555749	0.57894	0.445807	0.133133
F8WJN3	F8WJN3	Uncharacterized protein OS=Homo sapiens GN=CPSF6 PE=4 SV=1	0.310132	0.181008	0.646164	0.528647	1.48674	0.800316	0.379101	0.938567	-0.559466
Q641Q2	FA21A	WASH complex subunit FAM21A OS=Homo sapiens GN=FAM21A PE=1 SV=3	0.304454	0.0177841	0.485236	0.443356	-0.232379	1.01501	0.269158	0.408663	-0.139505
Q5SNT6	FA21B	WASH complex subunit FAM21B OS=Homo sapiens GN=FAM21B PE=1 SV=2	0.304454	0.139616	0.485236	0.443356	-0.0719991	1.01501	0.309769	0.462123	-0.152354
P15090	FABP4	Fatty acid-binding protein, adipocyte OS=Homo sapiens GN=FABP4 PE=1 SV=3	2.38754	1.47543	1.99084	0.524807	-0.203986	0.804275	1.95127	0.375032	1.57624
P05413	FABPH	Fatty acid-binding protein, heart OS=Homo sapiens GN=FABP3 PE=1 SV=4	1.41168	0.848113	0.583228	0.64334	-0.739583	-0.0139672	0.947675	-0.0367366	0.984411
P49327	FAS	Fatty acid synthase OS=Homo sapiens GN=FASN PE=1 SV=3	1.45609	0.869506	0.513548	-2.08422	-0.954155	-1.26384	0.94638	-1.43407	2.38045
Q12805	FBLN3	EGF-containing fibulin-like extracellular matrix protein 1 OS=Homo sapiens GN=EFEMP1 PE=1 SV=2	0.434902	0.472644	0.621817	0.922867	0.813073	0.968409	0.509788	0.90145	-0.391662
P35555	FBN1	Fibrillin-1 OS=Homo sapiens GN=FBN1 PE=1 SV=3	0.328758	0.698498	0.946134	0.296756	0.359811	-0.0898914	0.657797	0.188892	0.468905
P02765	FETUA	Alpha-2-HS-glycoprotein OS=Homo sapiens GN=AHSG PE=1 SV=1	0.454482	-0.379434	1.58797	-0.0958099	1.24361	0.656293	0.554339	0.601363	-0.047024
Q14192	FHL2	Four and a half LIM domains protein 2 OS=Homo sapiens GN=FHL2 PE=1 SV=3	0.749625	0.858358	0.703439	0.268193	1.25698	0.524543	0.770474	0.68324	0.0872341
P02751	FINC	Fibronectin OS=Homo sapiens GN=FN1 PE=1 SV=4	-0.0923144	-0.295907	0.173829	0.00398594	0.580697	0.590271	-0.0714642	0.391651	-0.463115
Q96AY3	FKB10	Peptidyl-prolyl cis-trans isomerase FKBP10 OS=Homo sapiens GN=FKBP10 PE=1 SV=1	-0.0352898	0.493636	0.297494	-0.677068	-0.295487	-0.0425564	0.251947	-0.33837	0.590317
P62942	FKB1A	Peptidyl-prolyl cis-trans isomerase FKBP1A OS=Homo sapiens GN=FKBP1A PE=1 SV=2	0.88767	0.0666899	-0.0768644	0.386138	-0.545622	0.132885	0.292499	-0.00886624	0.301365
P26885	FKBP2	Peptidyl-prolyl cis-trans isomerase FKBP2 OS=Homo sapiens GN=FKBP2 PE=1 SV=2	0.119978	1.17215	0.194621	0.0531564	-0.466144	0.164275	0.495582	-0.0829041	0.578486
O95302	FKBP9	Peptidyl-prolyl cis-trans isomerase FKBP9 OS=Homo sapiens GN=FKBP9 PE=1 SV=2	0.440333	0.629885	0.25507	0.147691	-0.0503172	0.280833	0.441763	0.126069	0.315694
O75369	FLNB	Filamin-B OS=Homo sapiens GN=FLNB PE=1 SV=2	2.31042	2.16589	1.60999	1.98878	1.77698	2.087	2.02876	1.95092	0.0778424
Q14315	FLNC	Filamin-C OS=Homo sapiens GN=FLNC PE=1 SV=3	0.819939	0.495825	0.465644	0.259118	0.19356	0.653748	0.593803	0.368809	0.224994
P02792	FRIL	Ferritin light chain OS=Homo sapiens GN=FTL PE=1 SV=2	0.673533	0.748402	1.11568	0.762321	0.694	0.948404	0.84587	0.801575	0.0442954
Q16658	FSCN1	Fascin OS=Homo sapiens GN=FSCN1 PE=1 SV=3	1.09846	-0.137646	-0.0648717	1.79773	0.753636	1.44232	0.298647	1.33123	-1.03258
Q12841	FSTL1	Follistatin-related protein 1 OS=Homo sapiens GN=FSTL1 PE=1 SV=1	0.148623	0.228176	0.390345	0.560793	1.09217	-0.109083	0.255715	0.514627	-0.258912
Q92945	FUBP2	Far upstream element-binding protein 2 OS=Homo sapiens GN=KHSRP PE=1 SV=4	0.180653	1.16759	0.397963	0.233865	1.83831	-0.171437	0.582069	0.633579	-0.0515105
P04066	FUCO	Tissue alpha-L-fucosidase OS=Homo sapiens GN=FUCA1 PE=1 SV=4	0.266058		0.0363175	0.191004		0.487419	0.151188	0.339212	-0.188024
Q9BTY2	FUCO2	Plasma alpha-L-fucosidase OS=Homo sapiens GN=FUCA2 PE=1 SV=2	0.266291	-0.0277294	1.05449	0.708789	0.127887	0.663753	0.431018	0.500143	-0.0691253
P07954	FUMH	Fumarate hydratase, mitochondrial OS=Homo sapiens GN=FH PE=1 SV=3	0.661508	0.93413	1.0456	0.768071	0.273674	0.844506	0.880411	0.62875	0.251661
P04406	G3P	Glyceraldehyde-3-phosphate dehydrogenase OS=Homo sapiens GN=GAPDH PE=1 SV=3	1.02771	0.425758	0.693027	1.41608	0.962744	1.43795	0.715498	1.27226	-0.55676
O95479	G6PE	GDH/6PGL endoplasmic bifunctional protein OS=Homo sapiens GN=H6PD PE=1 SV=2	0.952851	0.919121	2.54124	0.260386	-0.572256	1.04078	1.47107	0.242969	1.2281
P06744	G6PI	Glucose-6-phosphate isomerase OS=Homo sapiens GN=GPI PE=1 SV=4	1.73742	0.958072	0.983429	1.52402	0.754546	1.65817	1.22631	1.31224	-0.0859363
Q14697	GANAB	Neutral alpha-glucosidase AB OS=Homo sapiens GN=GANAB PE=1 SV=3	-0.174035	0.0963924	0.508869	0.716673	0.683624	0.223505	0.143742	0.541267	-0.397525
P62873	GBB1	Guanine nucleotide-binding protein G(I)/G(S)/G(T) subunit beta-1 OS=Homo sapiens GN=GNB1 PE=1 SV=3	0.183985	0.223873	0.566809	0.842133	1.00177	0.979058	0.324889	0.940986	-0.616097
P62879	GBB2	Guanine nucleotide-binding protein G(I)/G(S)/G(T) subunit beta-2 OS=Homo sapiens GN=GNB2 PE=1 SV=3	-0.632111	1.75765	1.35529	-0.166021	1.80109	0.715912	0.826941	0.783661	0.0432806
Q9HAV0	GBB4	Guanine nucleotide-binding protein subunit beta-4 OS=Homo sapiens GN=GNB4 PE=1 SV=3	-0.971305	1.81899	1.51406	-0.895037	2.49401	1.03089	0.787248	0.876623	-0.0893752
Q9UBI6	GBG12	Guanine nucleotide-binding protein G(I)/G(S)/G(O) subunit gamma-12 OS=Homo sapiens GN=GNG12 PE=1 SV=3	0.338619	0.313231	0.429291	0.639062	1.23528	0.592578	0.360381	0.822306	-0.461926
P63244	GBLP	Guanine nucleotide-binding protein subunit beta-2-like 1 OS=Homo sapiens GN=GNB2L1 PE=1 SV=3	1.30296	0.808124	-0.0621394	0.806841	0.506335	0.933369	0.682983	0.748848	-0.0658653
P23434	GCSH	Glycine cleavage system H protein, mitochondrial OS=Homo sapiens GN=GCSH PE=1 SV=2		0.759172	1.20965		-0.305555	-0.257254	0.984413	-0.281404	1.26582
P31150	GDIA	Rab GDP dissociation inhibitor alpha OS=Homo sapiens GN=GDI1 PE=1 SV=2	0.552264	-0.850877	-0.186526	0.312891	0.678418	-0.385822	-0.161713	0.201829	-0.363541
P50395	GDIB	Rab GDP dissociation inhibitor beta OS=Homo sapiens GN=GDI2 PE=1 SV=2	0.806415	0.59085	0.621217	0.55384	0.612042	1.53341	0.672827	0.899763	-0.226936
P52565	GDIR1	Rho GDP-dissociation inhibitor 1 OS=Homo sapiens GN=ARHGDIA PE=1 SV=3	0.975499	0.677684	0.347479	-0.130321	-0.388027	-0.0673198	0.666887	-0.195223	0.86211
P07093	GDN	Glia-derived nexin OS=Homo sapiens GN=SERPINE2 PE=1 SV=1	0.368282		0.840711	1.44953		1.83562	0.604496	1.64258	-1.03808
P06396	GELS	Gelsolin OS=Homo sapiens GN=GSN PE=1 SV=1	0.967494	0.465372	0.134875	0.667324	0.084136	0.582161	0.52258	0.44454	0.07804
P04062	GLCM	Glucosylceramidase OS=Homo sapiens GN=GBA PE=1 SV=3	0.193309	0.430644	0.48247	0.357846	-0.498774	0.667867	0.368808	0.175647	0.193161
Q04446	GLGB	1,4-alpha-glucan-branching enzyme OS=Homo sapiens GN=GBE1 PE=1 SV=2	1.07315	0.358702	0.26832	0.35634	-0.35417	0.764563	0.566723	0.255578	0.311145
P35754	GLRX1	Glutaredoxin-1 OS=Homo sapiens GN=GLRX PE=1 SV=2	0.730917	-0.022265	0.16305	0.398232	0.169692	0.820358	0.290567	0.462761	-0.172193
P14314	GLU2B	Glucosidase 2 subunit beta OS=Homo sapiens GN=PRKCSH PE=1 SV=2	0.37247	0.47301	0.566245	0.307259	0.625696	-0.176436	0.470575	0.252173	0.218402
P34897	GLYM	Serine hydroxymethyltransferase, mitochondrial OS=Homo sapiens GN=SHMT2 PE=1 SV=3	0.446924	0.0752186	-0.182196	0.669704	1.38433	-0.416496	0.113316	0.545846	-0.432531
P29992	GNA11	Guanine nucleotide-binding protein subunit alpha-11 OS=Homo sapiens GN=GNA11 PE=1 SV=2	-0.133573	0.676525	0.830619	1.14067	0.849871	0.234056	0.457857	0.741531	-0.283674
P63096	GNAI1	Guanine nucleotide-binding protein G(i) subunit alpha-1 OS=Homo sapiens GN=GNAI1 PE=1 SV=2			-0.27045	0.458068	1.29706	0.237989	-0.27045	0.664373	-0.934823
P04899	GNAI2	Guanine nucleotide-binding protein G(i) subunit alpha-2 OS=Homo sapiens GN=GNAI2 PE=1 SV=3	-0.0619874	-0.268349	0.266992	0.465132	1.06799	0.726542	-0.0211147	0.753222	-0.774337
P08754	GNAI3	Guanine nucleotide-binding protein G(k) subunit alpha OS=Homo sapiens GN=GNAI3 PE=1 SV=3			0.353551	0.458068	1.29706	0.0613876	0.353551	0.605505	-0.251954
P50148	GNAQ	Guanine nucleotide-binding protein G(q) subunit alpha OS=Homo sapiens GN=GNAQ PE=1 SV=4	-0.0952172	0.430801	0.522619	0.283021	0.473921	-0.101139	0.286068	0.218601	0.0674666
P46926	GNPI1	Glucosamine-6-phosphate isomerase 1 OS=Homo sapiens GN=GNPDA1 PE=1 SV=1	1.0871		-0.0162294	0.0962143		-0.44122	0.535435	-0.172503	0.707938
P15586	GNS	N-acetylglucosamine-6-sulfatase OS=Homo sapiens GN=GNS PE=1 SV=3	-0.0157573	0.0616033	0.662687	0.739373	1.52715	0.229211	0.236178	0.83191	-0.595732
Q14789	GOGB1	Golgin subfamily B member 1 OS=Homo sapiens GN=GOLGB1 PE=1 SV=2		-0.995585	0.49581		1.40757	0.259559	-0.249887	0.833563	-1.08345
P21695	GPDA	Glycerol-3-phosphate dehydrogenase [NAD+], cytoplasmic OS=Homo sapiens GN=GPD1 PE=1 SV=4	1.28305	0.591129	0.844425	-1.24743	-1.7335	-2.17779	0.906201	-1.71957	2.62577
Q9UBQ7	GRHPR	Glyoxylate reductase/hydroxypyruvate reductase OS=Homo sapiens GN=GRHPR PE=1 SV=1	0.90575	0.146706	0.192285	0.378427	-0.144875	0.456004	0.414913	0.229852	0.185061
P28799	GRN	Granulins OS=Homo sapiens GN=GRN PE=1 SV=2	0.563867	0.690178	0.76409	0.863622	1.05966	0.204001	0.672711	0.709093	-0.0363813
P38646	GRP75	Stress-70 protein, mitochondrial OS=Homo sapiens GN=HSPA9 PE=1 SV=2	1.27793	1.52075	1.65516	1.41891	1.52229	0.984233	1.48462	1.30848	0.176141
P11021	GRP78	78 kDa glucose-regulated protein OS=Homo sapiens GN=HSPA5 PE=1 SV=2	0.344547	0.313802	0.63175	0.819573	1.00766	0.734606	0.430033	0.853947	-0.423914
P00390	GSHR	Glutathione reductase, mitochondrial OS=Homo sapiens GN=GSR PE=1 SV=2	0.778363	0.387721	0.246518	0.461421	0.805092	0.702079	0.470868	0.656197	-0.18533
Q9Y2Q3	GSTK1	Glutathione S-transferase kappa 1 OS=Homo sapiens GN=GSTK1 PE=1 SV=3	0.556532	0.806785	0.897684	-0.81241	-1.05332	-0.245587	0.753667	-0.703771	1.45744
P78417	GSTO1	Glutathione S-transferase omega-1 OS=Homo sapiens GN=GSTO1 PE=1 SV=2	1.01232	-0.665075	0.519276	0.847794	1.60636	-0.322055	0.288841	0.7107	-0.421859
P09211	GSTP1	Glutathione S-transferase P OS=Homo sapiens GN=GSTP1 PE=1 SV=2	2.70256	0.946045	1.54786	2.16867	-0.0832188	1.63831	1.73215	1.24125	0.490901
Q8NBJ5	GT251	Procollagen galactosyltransferase 1 OS=Homo sapiens GN=GLT25D1 PE=1 SV=1	0.306322	0.722705	0.906766	-0.618434	0.00422031	0.361122	0.645264	-0.0843636	0.729628
Q02539	H11	Histone H1.1 OS=Homo sapiens GN=HIST1H1A PE=1 SV=3	-0.107655	0.551072	0.238042	0.404763	0.677213	-0.0993747	0.227153	0.327534	-0.100381
P16403	H12	Histone H1.2 OS=Homo sapiens GN=HIST1H1C PE=1 SV=2	1.12776	1.64783	0.953849	1.49902	1.93145	0.678842	1.24315	1.36977	-0.126623
P16402	H13	Histone H1.3 OS=Homo sapiens GN=HIST1H1D PE=1 SV=2	1.12776	1.64783	0.953849	1.49902	1.93145	0.678842	1.24315	1.36977	-0.126623
P10412	H14	Histone H1.4 OS=Homo sapiens GN=HIST1H1E PE=1 SV=2	1.12776	1.64783	0.953849	1.49902	1.93145	0.678842	1.24315	1.36977	-0.126623
P16401	H15	Histone H1.5 OS=Homo sapiens GN=HIST1H1B PE=1 SV=3	0.153676	0.536026		0.637305	1.78352		0.344851	1.21041	-0.865562
P22492	H1T	Histone H1t OS=Homo sapiens GN=HIST1H1T PE=1 SV=4	-0.107655	0.551072	0.238042	0.404763	0.677213	-0.0993747	0.227153	0.327534	-0.100381
P0C0S8	H2A1	Histone H2A type 1 OS=Homo sapiens GN=HIST1H2AG PE=1 SV=2	0.118643	0.790711	0.714309	0.859343	1.81874	0.906484	0.541221	1.19485	-0.653633
P04908	H2A1B	Histone H2A type 1-B/E OS=Homo sapiens GN=HIST1H2AB PE=1 SV=2	0.243382	0.665972	0.714309	1.0126	1.54925	0.906484	0.541221	1.15611	-0.614889
Q93077	H2A1C	Histone H2A type 1-C OS=Homo sapiens GN=HIST1H2AC PE=1 SV=3	0.243382	0.665972	0.714309	1.0126	1.54925	0.906484	0.541221	1.15611	-0.614889
P20671	H2A1D	Histone H2A type 1-D OS=Homo sapiens GN=HIST1H2AD PE=1 SV=2	0.118643	0.790711	0.714309	0.859343	1.81874	0.906484	0.541221	1.19485	-0.653633
Q96KK5	H2A1H	Histone H2A type 1-H OS=Homo sapiens GN=HIST1H2AH PE=1 SV=3	0.118643	0.790711	0.714309	0.859343	1.81874	0.906484	0.541221	1.19485	-0.653633
Q99878	H2A1J	Histone H2A type 1-J OS=Homo sapiens GN=HIST1H2AJ PE=1 SV=3	0.118643	0.790711	0.714309	0.859343	1.81874	0.906484	0.541221	1.19485	-0.653633
Q6FI13	H2A2A	Histone H2A type 2-A OS=Homo sapiens GN=HIST2H2AA3 PE=1 SV=3	0.118643	0.790711	0.714309	0.859343	1.81874	0.906484	0.541221	1.19485	-0.653633
Q16777	H2A2C	Histone H2A type 2-C OS=Homo sapiens GN=HIST2H2AC PE=1 SV=4	0.118643	0.790711	0.714309	0.859343	1.81874	0.906484	0.541221	1.19485	-0.653633
Q7L7L0	H2A3	Histone H2A type 3 OS=Homo sapiens GN=HIST3H2A PE=1 SV=3	0.243382	0.665972	0.714309	1.0126	1.54925	0.906484	0.541221	1.15611	-0.614889
Q9BTM1	H2AJ	Histone H2A.J OS=Homo sapiens GN=H2AFJ PE=1 SV=1	0.118643	0.790711	0.714309	0.859343	1.81874	0.906484	0.541221	1.19485	-0.653633
Q71UI9	H2AV	Histone H2A.V OS=Homo sapiens GN=H2AFV PE=1 SV=3	-0.042506	0.130605	0.390652	0.448716	1.40811	-0.0829373	0.159584	0.591296	-0.431712
P0C0S5	H2AZ	Histone H2A.Z OS=Homo sapiens GN=H2AFZ PE=1 SV=2	-0.042506	0.130605	0.390652	0.448716	1.40811	-0.0829373	0.159584	0.591296	-0.431712
Q96A08	H2B1A	Histone H2B type 1-A OS=Homo sapiens GN=HIST1H2BA PE=1 SV=3	-1.4842	0.0214935	0.0389704	0.252374	1.08859	-0.264003	-0.47458	0.358987	-0.833567
P33778	H2B1B	Histone H2B type 1-B OS=Homo sapiens GN=HIST1H2BB PE=1 SV=2	0.246251	0.744966	1.40579	1.136	0.868775	1.64236	0.799001	1.21571	-0.416712
P62807	H2B1C	Histone H2B type 1-C/E/F/G/I OS=Homo sapiens GN=HIST1H2BC PE=1 SV=4	0.266968	1.12604	1.44864	1.0935	1.41823	1.17229	0.947217	1.228	-0.280787
P58876	H2B1D	Histone H2B type 1-D OS=Homo sapiens GN=HIST1H2BD PE=1 SV=2	0.266968	1.12604	1.44864	1.0935	1.41823	1.17229	0.947217	1.228	-0.280787
Q93079	H2B1H	Histone H2B type 1-H OS=Homo sapiens GN=HIST1H2BH PE=1 SV=3	0.266968	1.12604	1.44864	1.0935	1.41823	1.17229	0.947217	1.228	-0.280787
P06899	H2B1J	Histone H2B type 1-J OS=Homo sapiens GN=HIST1H2BJ PE=1 SV=3	0.246251	0.744966	1.40579	1.136	0.868775	1.64236	0.799001	1.21571	-0.416712
O60814	H2B1K	Histone H2B type 1-K OS=Homo sapiens GN=HIST1H2BK PE=1 SV=3	0.266968	1.12604	1.44864	1.0935	1.41823	1.17229	0.947217	1.228	-0.280787
Q99880	H2B1L	Histone H2B type 1-L OS=Homo sapiens GN=HIST1H2BL PE=1 SV=3	0.266968	1.12604	1.44864	1.0935	1.41823	1.17229	0.947217	1.228	-0.280787
Q99879	H2B1M	Histone H2B type 1-M OS=Homo sapiens GN=HIST1H2BM PE=1 SV=3	0.266968	1.12604	1.44864	1.0935	1.41823	1.17229	0.947217	1.228	-0.280787
Q99877	H2B1N	Histone H2B type 1-N OS=Homo sapiens GN=HIST1H2BN PE=1 SV=3	0.266968	1.12604	1.44864	1.0935	1.41823	1.17229	0.947217	1.228	-0.280787
P23527	H2B1O	Histone H2B type 1-O OS=Homo sapiens GN=HIST1H2BO PE=1 SV=3	0.246251	0.744966	1.40579	1.136	0.868775	1.64236	0.799001	1.21571	-0.416712
Q16778	H2B2E	Histone H2B type 2-E OS=Homo sapiens GN=HIST2H2BE PE=1 SV=3	0.246251	0.744966	1.40579	1.136	0.868775	1.64236	0.799001	1.21571	-0.416712
Q5QNW6	H2B2F	Histone H2B type 2-F OS=Homo sapiens GN=HIST2H2BF PE=1 SV=3	0.266968	1.12604	1.44864	1.0935	1.41823	1.17229	0.947217	1.228	-0.280787
Q8N257	H2B3B	Histone H2B type 3-B OS=Homo sapiens GN=HIST3H2BB PE=1 SV=3	0.246251	0.744966	1.40579	1.136	0.868775	1.64236	0.799001	1.21571	-0.416712
P57053	H2BFS	Histone H2B type F-S OS=Homo sapiens GN=H2BFS PE=1 SV=2	0.266968	1.12604	1.44864	1.0935	1.41823	1.17229	0.947217	1.228	-0.280787
P62805	H4	Histone H4 OS=Homo sapiens GN=HIST1H4A PE=1 SV=2	0.374994	1.08329	0.633969	0.404258	0.62645	-0.122228	0.697416	0.302827	0.39459
Q58FF8	H90B2	Putative heat shock protein HSP 90-beta 2 OS=Homo sapiens GN=HSP90AB2P PE=1 SV=2	0.652178	0.0108989	-0.0958692	-0.149049	-0.402234	-0.0439757	0.189069	-0.19842	0.387489
Q58FF7	H90B3	Putative heat shock protein HSP 90-beta-3 OS=Homo sapiens GN=HSP90AB3P PE=5 SV=1	0.619461	0.60019	0.527491	-0.0207921	-0.222576	-0.0621296	0.582381	-0.101832	0.684213
Q99714	HCD2	3-hydroxyacyl-CoA dehydrogenase type-2 OS=Homo sapiens GN=HSD17B10 PE=1 SV=3	0.379244	0.677718	1.41995	0.132299	0.108285	0.714941	0.825638	0.318508	0.50713
P51858	HDGF	Hepatoma-derived growth factor OS=Homo sapiens GN=HDGF PE=1 SV=1	0.165707	-0.234756	-0.25093	0.223679	-0.483496	0.380579	-0.10666	0.0402539	-0.146914
P36551	HEM6	Coproporphyrinogen-III oxidase, mitochondrial OS=Homo sapiens GN=CPOX PE=1 SV=3	0.325677	0.0739266	0.0146135	0.191616	0.934783	0.355796	0.138073	0.494065	-0.355992
P06865	HEXA	Beta-hexosaminidase subunit alpha OS=Homo sapiens GN=HEXA PE=1 SV=2	0.098875	0.0517445	0.360653	0.5054	0.0619602	0.396203	0.170424	0.321188	-0.150763
P07686	HEXB	Beta-hexosaminidase subunit beta OS=Homo sapiens GN=HEXB PE=1 SV=3	0.524979	0.390747	0.750328	1.04564	0.520544	0.793571	0.555351	0.786585	-0.231233
Q9BX68	HINT2	Histidine triad nucleotide-binding protein 2, mitochondrial OS=Homo sapiens GN=HINT2 PE=1 SV=1	-0.562198	-0.496357	0.311235	-0.0402971	0.765278	0.139389	-0.249107	0.288123	-0.53723
O60812	HNRCL	Heterogeneous nuclear ribonucleoprotein C-like 1 OS=Homo sapiens GN=HNRNPCL1 PE=1 SV=1	0.363917	0.370006	0.543502	0.338419	0.655103	-0.559398	0.425808	0.144708	0.2811
O14979	HNRDL	Heterogeneous nuclear ribonucleoprotein D-like OS=Homo sapiens GN=HNRPDL PE=1 SV=3	-2.23187	-0.25867	0.287267	0.0161639	0.893139	-0.469267	-0.734426	0.146678	-0.881104
P31943	HNRH1	Heterogeneous nuclear ribonucleoprotein H OS=Homo sapiens GN=HNRNPH1 PE=1 SV=4	0.21634	0.748956	0.333583	0.214538	0.608006	0.291054	0.43296	0.3712	0.0617603
P55795	HNRH2	Heterogeneous nuclear ribonucleoprotein H2 OS=Homo sapiens GN=HNRNPH2 PE=1 SV=1	0.210767	0.592454	0.410109	0.0967546	0.625985	0.25508	0.404443	0.32594	0.0785033
Q1KMD3	HNRL2	Heterogeneous nuclear ribonucleoprotein U-like protein 2 OS=Homo sapiens GN=HNRNPUL2 PE=1 SV=1	0.204735	0.898853	-0.26869	0.321716	0.322951	1.09144	0.278299	0.578701	-0.300402
P07910	HNRPC	Heterogeneous nuclear ribonucleoproteins C1/C2 OS=Homo sapiens GN=HNRNPC PE=1 SV=4	0.416356	0.580384	0.933912	0.377556	0.744205	0.4411	0.643551	0.520954	0.122597
P38159	HNRPG	Heterogeneous nuclear ribonucleoprotein G OS=Homo sapiens GN=RBMX PE=1 SV=3	0.101269	0.66359	0.168134	0.191619	-0.0979394	-0.188428	0.310998	-0.0315828	0.34258
P61978	HNRPK	Heterogeneous nuclear ribonucleoprotein K OS=Homo sapiens GN=HNRNPK PE=1 SV=1	0.576315	1.03354	1.75596	1.25094	1.11628	1.07166	1.12194	1.14629	-0.0243562
P14866	HNRPL	Heterogeneous nuclear ribonucleoprotein L OS=Homo sapiens GN=HNRNPL PE=1 SV=2	0.703882	0.527149	0.384182	-0.38274	-0.0439066	-0.0276557	0.538404	-0.151434	0.689838
O43390	HNRPR	Heterogeneous nuclear ribonucleoprotein R OS=Homo sapiens GN=HNRNPR PE=1 SV=1	0.0870138	0.384505	0.485659	0.118812	-0.0461107	0.103226	0.319059	0.0586427	0.260417
Q00839	HNRPU	Heterogeneous nuclear ribonucleoprotein U OS=Homo sapiens GN=HNRNPU PE=1 SV=6	1.04711	0.475391	1.02835	0.960397	-0.348421	1.44066	0.850284	0.684211	0.166073
Q5SSJ5	HP1B3	Heterochromatin protein 1-binding protein 3 OS=Homo sapiens GN=HP1BP3 PE=1 SV=1	0.334008	0.739363	0.143633	0.987751	0.399575	0.057636	0.405668	0.481654	-0.0759859
Q92598	HS105	Heat shock protein 105 kDa OS=Homo sapiens GN=HSPH1 PE=1 SV=1	0.669408	0.0683166	0.22153	0.244189	0.772059	0.426214	0.319751	0.480821	-0.161069
P34931	HS71L	Heat shock 70 kDa protein 1-like OS=Homo sapiens GN=HSPA1L PE=1 SV=2	0.588559	0.932431	0.519708	0.477486	0.520305	0.461531	0.680233	0.486441	0.193792
Q58FG1	HS904	Putative heat shock protein HSP 90-alpha A4 OS=Homo sapiens GN=HSP90AA4P PE=5 SV=1	0.64111	0.150818	-0.378216	0.12562	-0.559329	0.327825	0.137904	-0.0352946	0.173198
P08238	HS90B	Heat shock protein HSP 90-beta OS=Homo sapiens GN=HSP90AB1 PE=1 SV=4	0.945893	0.391244	0.029164	0.0597857	-0.509364	0.324134	0.455433	-0.0418149	0.497248
P08107	HSP71	Heat shock 70 kDa protein 1A/1B OS=Homo sapiens GN=HSPA1A PE=1 SV=5	1.5822	1.56935	1.59223	1.65934	1.60732	1.00713	1.58126	1.4246	0.156665
P54652	HSP72	Heat shock-related 70 kDa protein 2 OS=Homo sapiens GN=HSPA2 PE=1 SV=1	1.85449	1.647	1.46351	1.62512	1.66323	1.5411	1.655	1.60982	0.0451835
P34932	HSP74	Heat shock 70 kDa protein 4 OS=Homo sapiens GN=HSPA4 PE=1 SV=4	0.693475	0.0890979	0.149442	0.598207	-0.428358	0.452506	0.310672	0.207452	0.10322
P17066	HSP76	Heat shock 70 kDa protein 6 OS=Homo sapiens GN=HSPA6 PE=1 SV=2	0.414926	0.6103	0.513072	0.23489	0.480545	0.697246	0.512766	0.470894	0.0418726
P48741	HSP77	Putative heat shock 70 kDa protein 7 OS=Homo sapiens GN=HSPA7 PE=5 SV=2	0.429245	0.6103	0.387051	0.249208	0.480545	0.276522	0.475532	0.335425	0.140107
P11142	HSP7C	Heat shock cognate 71 kDa protein OS=Homo sapiens GN=HSPA8 PE=1 SV=1	1.76728	1.39149	1.47331	1.7695	1.86236	1.93172	1.54403	1.85453	-0.310501
P04792	HSPB1	Heat shock protein beta-1 OS=Homo sapiens GN=HSPB1 PE=1 SV=2	2.31155	2.81672	2.91474	2.57838	2.85729	3.1623	2.681	2.86599	-0.184989
O14558	HSPB6	Heat shock protein beta-6 OS=Homo sapiens GN=HSPB6 PE=1 SV=2	1.18946	0.798054	1.00321	0.144283	0.657168	-0.184793	0.996907	0.205553	0.791354
Q9UBY9	HSPB7	Heat shock protein beta-7 OS=Homo sapiens GN=HSPB7 PE=1 SV=1	1.21297	0.639182	0.765308	0.949757	0.321146	0.888169	0.872486	0.719691	0.152796
P07099	HYEP	Epoxide hydrolase 1 OS=Homo sapiens GN=EPHX1 PE=1 SV=1	1.30702	1.11982	-0.27455	-0.48499	0.454808	0.223641	0.71743	0.0644861	0.652943
Q9Y4L1	HYOU1	Hypoxia up-regulated protein 1 OS=Homo sapiens GN=HYOU1 PE=1 SV=1	0.682767	1.0019	1.11816	0.728239	0.0796568	2.15897	0.934277	0.988956	-0.0546793
Q16270	IBP7	Insulin-like growth factor-binding protein 7 OS=Homo sapiens GN=IGFBP7 PE=1 SV=1	-0.0327589	-0.0547502	-0.196741	1.11873	1.69646	0.618972	-0.0947502	1.14472	-1.23947
P50213	IDH3A	Isocitrate dehydrogenase [NAD] subunit alpha, mitochondrial OS=Homo sapiens GN=IDH3A PE=1 SV=1	0.412691	2.52367	0.909896	0.379639	2.25094	-0.0824807	1.28209	0.849365	0.432721
O75874	IDHC	Isocitrate dehydrogenase [NADP] cytoplasmic OS=Homo sapiens GN=IDH1 PE=1 SV=2	1.02141	0.400786	0.345688	0.249233	-1.16866	0.295387	0.589296	-0.208015	0.797311
P48735	IDHP	Isocitrate dehydrogenase [NADP], mitochondrial OS=Homo sapiens GN=IDH2 PE=1 SV=2	0.226057	0.476132	0.401375	0.398707	0.0820484	0.108765	0.367855	0.196507	0.171348
P05198	IF2A	Eukaryotic translation initiation factor 2 subunit 1 OS=Homo sapiens GN=EIF2S1 PE=1 SV=3	1.2582	0.615495	-0.00274524	0.836109	0.509805	0.621977	0.623648	0.655964	-0.0323155
P20042	IF2B	Eukaryotic translation initiation factor 2 subunit 2 OS=Homo sapiens GN=EIF2S2 PE=1 SV=2		0.860635	0.518993		0.184602	0.774994	0.689814	0.479798	0.210016
O00425	IF2B3	Insulin-like growth factor 2 mRNA-binding protein 3 OS=Homo sapiens GN=IGF2BP3 PE=1 SV=2	0.274101	0.973387	0.668403	-0.0279887	-0.85996	0.457092	0.63863	-0.143619	0.782249
A6NK07	IF2BL	Eukaryotic translation initiation factor 2 subunit 2-like protein OS=Homo sapiens PE=1 SV=1		0.860635	0.518993		0.184602	0.774994	0.689814	0.479798	0.210016
P41091	IF2G	Eukaryotic translation initiation factor 2 subunit 3 OS=Homo sapiens GN=EIF2S3 PE=1 SV=3	0.59846	0.446894	0.302249	-0.0611565	0.889185	0.500275	0.449201	0.442768	0.00643286
P60842	IF4A1	Eukaryotic initiation factor 4A-I OS=Homo sapiens GN=EIF4A1 PE=1 SV=1	0.696528	0.728927	0.56098	0.488224	0.113332	0.972993	0.662145	0.52485	0.137295
Q14240	IF4A2	Eukaryotic initiation factor 4A-II OS=Homo sapiens GN=EIF4A2 PE=1 SV=2	0.696528	0.466372	0.56098	0.488224	0.682145	0.972993	0.574627	0.714454	-0.139827
P38919	IF4A3	Eukaryotic initiation factor 4A-III OS=Homo sapiens GN=EIF4A3 PE=1 SV=4	0.696528	0.452912	0.812532	0.488224	0.496978	0.988773	0.653991	0.657992	-0.00400104
P23588	IF4B	Eukaryotic translation initiation factor 4B OS=Homo sapiens GN=EIF4B PE=1 SV=2	0.853459	0.797009	0.303784	0.833522	0.759011	0.583263	0.651418	0.725265	-0.0738477
P55010	IF5	Eukaryotic translation initiation factor 5 OS=Homo sapiens GN=EIF5 PE=1 SV=2	1.04947	0.519543	0.596228	-0.19342	0.138956	-0.219485	0.721745	-0.0913162	0.813062
P56537	IF6	Eukaryotic translation initiation factor 6 OS=Homo sapiens GN=EIF6 PE=1 SV=1	0.363673	0.556551	0.268396	0.142239	0.415984	0.25071	0.396207	0.269644	0.126562
Q12905	ILF2	Interleukin enhancer-binding factor 2 OS=Homo sapiens GN=ILF2 PE=1 SV=2	0.263409	2.36006	1.05211	0.733704	2.71241	0.746185	1.22519	1.39743	-0.172238
Q12906	ILF3	Interleukin enhancer-binding factor 3 OS=Homo sapiens GN=ILF3 PE=1 SV=3	0.375108	0.632815	0.613839	0.0115126	0.354244	0.321391	0.540588	0.229049	0.311538
Q16891	IMMT	Mitochondrial inner membrane protein OS=Homo sapiens GN=IMMT PE=1 SV=1	0.108684	0.821467	0.663856	-0.307073	-0.063926	-0.224852	0.531335	-0.198617	0.729952
Q15181	IPYR	Inorganic pyrophosphatase OS=Homo sapiens GN=PPA1 PE=1 SV=2	1.36666	0.519226	-1.16673	-0.554246	-1.71116	-0.325189	0.239718	-0.863531	1.10325
P46940	IQGA1	Ras GTPase-activating-like protein IQGAP1 OS=Homo sapiens GN=IQGAP1 PE=1 SV=1	0.346062	0.635434	0.590941	0.0120573	0.0578463	0.717348	0.524146	0.262417	0.261729
P06756	ITAV	Integrin alpha-V OS=Homo sapiens GN=ITGAV PE=1 SV=2	0.359329	0.293833	0.321715	1.39788	0.979288	2.53441	0.324959	1.63719	-1.31223
P05556	ITB1	Integrin beta-1 OS=Homo sapiens GN=ITGB1 PE=1 SV=2	0.205627	0.0706253	0.631937	0.625127	1.5518	0.978875	0.30273	1.05194	-0.749205
P18084	ITB5	Integrin beta-5 OS=Homo sapiens GN=ITGB5 PE=1 SV=1	0.183544	-0.295356	0.573452	0.371398	0.270047	-0.443038	0.15388	0.0661359	0.087744
O95965	ITGBL	Integrin beta-like protein 1 OS=Homo sapiens GN=ITGBL1 PE=2 SV=1	0.177473	-0.189013	-0.956328	0.134878	1.57886	-0.0212295	-0.322623	0.56417	-0.886793
P19823	ITIH2	Inter-alpha-trypsin inhibitor heavy chain H2 OS=Homo sapiens GN=ITIH2 PE=1 SV=2	0.217754	0.355831	0.498299	0.881351	0.253643	-0.231417	0.357295	0.301192	0.0561024
Q06033	ITIH3	Inter-alpha-trypsin inhibitor heavy chain H3 OS=Homo sapiens GN=ITIH3 PE=1 SV=2	0.0292594	0.360549	1.53416	-0.038153	0.109647	1.02445	0.641323	0.365315	0.276009
P13645	K1C10	Keratin, type I cytoskeletal 10 OS=Homo sapiens GN=KRT10 PE=1 SV=6	0.36604	0.358698	2.45967	1.9028	0.0623809	-0.680892	1.06147	0.428096	0.633373
P02533	K1C14	Keratin, type I cytoskeletal 14 OS=Homo sapiens GN=KRT14 PE=1 SV=4	-0.704996	-0.42294	2.11188	2.26736	0.0508856	-2.80638	0.327983	-0.162713	0.490696
P08779	K1C16	Keratin, type I cytoskeletal 16 OS=Homo sapiens GN=KRT16 PE=1 SV=4	-0.666088	-0.454293	1.90483	2.32223	-0.616448	-2.72896	0.261484	-0.341056	0.60254
P05783	K1C18	Keratin, type I cytoskeletal 18 OS=Homo sapiens GN=KRT18 PE=1 SV=2	0.536279	0.908571	0.762258	0.484531	-0.0194782	0.351581	0.735702	0.272211	0.463491
P08727	K1C19	Keratin, type I cytoskeletal 19 OS=Homo sapiens GN=KRT19 PE=1 SV=4	0.289924	-0.454293	0.715214	0.380446	-0.616448	-0.00906586	0.183615	-0.0816893	0.265304
Q7Z3Z0	K1C25	Keratin, type I cytoskeletal 25 OS=Homo sapiens GN=KRT25 PE=1 SV=1	-1.05209		2.55797	0.92813		-2.85256	0.752938	-0.962216	1.71515
Q7Z3Y8	K1C27	Keratin, type I cytoskeletal 27 OS=Homo sapiens GN=KRT27 PE=1 SV=2	-1.05209		2.55797	0.92813		-2.85256	0.752938	-0.962216	1.71515
Q7Z3Y7	K1C28	Keratin, type I cytoskeletal 28 OS=Homo sapiens GN=KRT28 PE=1 SV=2	-1.05209		2.55797	0.92813		-2.85256	0.752938	-0.962216	1.71515
P35527	K1C9	Keratin, type I cytoskeletal 9 OS=Homo sapiens GN=KRT9 PE=1 SV=3	0.129197	-0.104132	2.04006	1.84987	0.317274	-1.08369	0.688376	0.361154	0.327223
P35908	K22E	Keratin, type II cytoskeletal 2 epidermal OS=Homo sapiens GN=KRT2 PE=1 SV=2	-0.161086	0.346189	1.90337	1.90605	0.115117	-1.12077	0.696158	0.300132	0.396026
P04264	K2C1	Keratin, type II cytoskeletal 1 OS=Homo sapiens GN=KRT1 PE=1 SV=6	0.129244	0.317664	2.2098	1.54285	0.0277446	-1.6214	0.885568	-0.0169373	0.902506
P13647	K2C5	Keratin, type II cytoskeletal 5 OS=Homo sapiens GN=KRT5 PE=1 SV=3	-0.522136		1.27334	1.73966		-1.96134	0.375603	-0.110841	0.486444
P02538	K2C6A	Keratin, type II cytoskeletal 6A OS=Homo sapiens GN=KRT6A PE=1 SV=3	-0.923484	-1.1678	1.83659	1.58663	-0.355416	-1.98348	-0.0848971	-0.250756	0.165859
P04259	K2C6B	Keratin, type II cytoskeletal 6B OS=Homo sapiens GN=KRT6B PE=1 SV=5	-0.534671	-0.398421	2.52719	1.97347	-0.115348	-1.33582	0.531365	0.174101	0.357264
P48668	K2C6C	Keratin, type II cytoskeletal 6C OS=Homo sapiens GN=KRT6C PE=1 SV=3	-0.923484	-1.1678	1.83659	1.58663	-0.355416	-1.98348	-0.0848971	-0.250756	0.165859
P08729	K2C7	Keratin, type II cytoskeletal 7 OS=Homo sapiens GN=KRT7 PE=1 SV=5	0.1546	0.906787	0.481991	0.322639	0.356241	0.249904	0.51446	0.309595	0.204865
Q3SY84	K2C71	Keratin, type II cytoskeletal 71 OS=Homo sapiens GN=KRT71 PE=1 SV=3	-0.412477	0.0179986	1.92452	1.24918	-0.132073	0.321992	0.510015	0.4797	0.0303155
Q86Y46	K2C73	Keratin, type II cytoskeletal 73 OS=Homo sapiens GN=KRT73 PE=1 SV=1	-0.570173	0.0179986	1.72852	1.51059	-0.132073	-1.17639	0.392116	0.0673762	0.32474
Q9UIJ7	KAD3	GTP:AMP phosphotransferase, mitochondrial OS=Homo sapiens GN=AK3 PE=1 SV=4	0.432851	0.69845	0.347695	0.804203	-0.959945	-0.186486	0.492999	-0.114076	0.607075
P10644	KAP0	cAMP-dependent protein kinase type I-alpha regulatory subunit OS=Homo sapiens GN=PRKAR1A PE=1 SV=1	1.10195	0.374201	0.160141	-0.0568538	-0.949007	0.529757	0.545431	-0.158701	0.704132
P13861	KAP2	cAMP-dependent protein kinase type II-alpha regulatory subunit OS=Homo sapiens GN=PRKAR2A PE=1 SV=2	0.893689	0.463844		-0.280335	0.969112		0.678767	0.344388	0.334378
Q6YP21	KAT3	Kynurenine--oxoglutarate transaminase 3 OS=Homo sapiens GN=CCBL2 PE=1 SV=1		0.788567	0.107011		0.0368169	-0.557494	0.447789	-0.260339	0.708128
Q96CX2	KCD12	BTB/POZ domain-containing protein KCTD12 OS=Homo sapiens GN=KCTD12 PE=1 SV=1	0.378247	0.590867	0.160014	0.329993	-0.218516	1.39898	0.376376	0.503485	-0.127109
P12277	KCRB	Creatine kinase B-type OS=Homo sapiens GN=CKB PE=1 SV=1	0.946278	0.882615	0.295606	0.697808	-0.168123	0.549672	0.708167	0.359786	0.348381
P14618	KPYM	Pyruvate kinase isozymes M1/M2 OS=Homo sapiens GN=PKM2 PE=1 SV=4	1.41157	0.590535	0.526659	1.35558	0.504249	1.61128	0.842923	1.15704	-0.314114
Q86UP2	KTN1	Kinectin OS=Homo sapiens GN=KTN1 PE=1 SV=1	0.23419	0.437522	0.519492	0.112998	0.556568	0.267308	0.397068	0.312291	0.0847766
P07942	LAMB1	Laminin subunit beta-1 OS=Homo sapiens GN=LAMB1 PE=1 SV=2	0.398269	0.874671	0.721114	0.914947	0.558358	0.950729	0.664684	0.808011	-0.143327
P11047	LAMC1	Laminin subunit gamma-1 OS=Homo sapiens GN=LAMC1 PE=1 SV=3	-0.163167	-0.100576	0.261963	-0.153593	0.126289	0.0755988	-0.000593285	0.0160982	-0.0166915
P11279	LAMP1	Lysosome-associated membrane glycoprotein 1 OS=Homo sapiens GN=LAMP1 PE=1 SV=3	-0.0659589	3.67064	1.16933	0.489834	3.12246	0.151299	1.59134	1.25453	0.336803
Q14847	LASP1	LIM and SH3 domain protein 1 OS=Homo sapiens GN=LASP1 PE=1 SV=2	0.499439	0.462132	0.164415	0.422534	1.00183	0.521916	0.375329	0.64876	-0.273431
Q6ZMR3	LDH6A	L-lactate dehydrogenase A-like 6A OS=Homo sapiens GN=LDHAL6A PE=2 SV=1	1.46494	0.351642	0.512747	1.82661	1.10645	0.672606	0.776442	1.20189	-0.425448
P00338	LDHA	L-lactate dehydrogenase A chain OS=Homo sapiens GN=LDHA PE=1 SV=2	1.66411	0.745219	0.499768	1.37108	1.08992	0.665126	0.9697	1.04204	-0.072342
P07195	LDHB	L-lactate dehydrogenase B chain OS=Homo sapiens GN=LDHB PE=1 SV=2	1.53973	1.141	0.733081	0.984409	0.805673	0.379486	1.13794	0.723189	0.414749
P09382	LEG1	Galectin-1 OS=Homo sapiens GN=LGALS1 PE=1 SV=2	1.56675	0.644461	0.355041	1.45106	0.835928	0.926757	0.855416	1.07125	-0.215832
Q08380	LG3BP	Galectin-3-binding protein OS=Homo sapiens GN=LGALS3BP PE=1 SV=1	0.163198	0.752771	0.331858	0.352163	-0.129981	0.365001	0.415942	0.195728	0.220214
Q9UHB6	LIMA1	LIM domain and actin-binding protein 1 OS=Homo sapiens GN=LIMA1 PE=1 SV=1	0.182286	0.706458	0.633459	0.609734	0.0894087	0.764197	0.507401	0.48778	0.0196211
Q9UPQ0	LIMC1	LIM and calponin homology domains-containing protein 1 OS=Homo sapiens GN=LIMCH1 PE=1 SV=4	0.25692	0.295885	0.0394506	0.718864	1.25592	0.509506	0.197419	0.828096	-0.630678
P43034	LIS1	Platelet-activating factor acetylhydrolase IB subunit alpha OS=Homo sapiens GN=PAFAH1B1 PE=1 SV=2	0.911198	0.13355	0.105786	0.0317677	-0.36482	0.250407	0.383511	-0.0275485	0.411059
Q9NZU5	LMCD1	LIM and cysteine-rich domains protein 1 OS=Homo sapiens GN=LMCD1 PE=1 SV=1	1.48617	0.103628	0.533093		0.10531	0.212712	0.707629	0.159011	0.548618
P02545	LMNA	Prelamin-A/C OS=Homo sapiens GN=LMNA PE=1 SV=1	0.552901	0.696903	1.2296	0.832247	0.940566	0.905387	0.826468	0.892733	-0.0662655
P20700	LMNB1	Lamin-B1 OS=Homo sapiens GN=LMNB1 PE=1 SV=2	-0.162635	0.171991	0.582938	0.851522	1.583	0.87385	0.197431	1.10279	-0.905359
Q03252	LMNB2	Lamin-B2 OS=Homo sapiens GN=LMNB2 PE=1 SV=3	0.722963	0.794223	0.863391	0.81672	0.637006	0.419962	0.793526	0.624562	0.168963
P42704	LPPRC	Leucine-rich PPR motif-containing protein, mitochondrial OS=Homo sapiens GN=LRPPRC PE=1 SV=3	0.894947	0.889238	1.48177	0.403738	0.411686	1.04037	1.08865	0.618599	0.470052
Q07954	LRP1	Prolow-density lipoprotein receptor-related protein 1 OS=Homo sapiens GN=LRP1 PE=1 SV=2	0.0927105	0.594292	0.401945	0.226135	0.371845	-0.169457	0.362983	0.142841	0.220142
P62310	LSM3	U6 snRNA-associated Sm-like protein LSm3 OS=Homo sapiens GN=LSM3 PE=1 SV=2	-0.363087	-0.425288	-0.0591699	-0.00588986	1.15689	0.1261	-0.282515	0.425699	-0.708214
Q9Y2Q5	LTOR2	Ragulator complex protein LAMTOR2 OS=Homo sapiens GN=LAMTOR2 PE=1 SV=1	1.02366	0.880571	1.70994	1.26155	0.641534	1.1736	1.20472	1.02556	0.179163
P10253	LYAG	Lysosomal alpha-glucosidase OS=Homo sapiens GN=GAA PE=1 SV=4	0.313812	0.507542	0.636807	0.780811	1.33575	0.53171	0.486054	0.882756	-0.396702
O00754	MA2B1	Lysosomal alpha-mannosidase OS=Homo sapiens GN=MAN2B1 PE=1 SV=3	-1.03952	4.44727	1.12194	-1.64172	5.65549	0.874754	1.5099	1.62951	-0.119607
Q9Y2E5	MA2B2	Epididymis-specific alpha-mannosidase OS=Homo sapiens GN=MAN2B2 PE=1 SV=4	-0.0533822	1.12471	0.0470353	0.161899	0.641601	0.0998039	0.372787	0.301102	0.0716853
O00462	MANBA	Beta-mannosidase OS=Homo sapiens GN=MANBA PE=1 SV=3	0.221579	0.436274	0.519326	0.400037	-0.0209082	0.714381	0.392393	0.364503	0.0278898
P55145	MANF	Mesencephalic astrocyte-derived neurotrophic factor OS=Homo sapiens GN=MANF PE=1 SV=3	0.0842257	0.472596	0.294104	0.650768	0.228178	0.670343	0.283642	0.51643	-0.232788
P46821	MAP1B	Microtubule-associated protein 1B OS=Homo sapiens GN=MAP1B PE=1 SV=2	0.766855	0.722957	0.905793	0.0359691	0.612108	0.231704	0.798535	0.29326	0.505275
Q15691	MARE1	Microtubule-associated protein RP/EB family member 1 OS=Homo sapiens GN=MAPRE1 PE=1 SV=3	0.571647	0.518967	0.048713	0.674843	0.268169	0.714204	0.379776	0.552405	-0.17263
P40925	MDHC	Malate dehydrogenase, cytoplasmic OS=Homo sapiens GN=MDH1 PE=1 SV=4	1.60727	0.661043	0.477932	1.04537	0.82167	0.271675	0.915413	0.712905	0.202508
P40926	MDHM	Malate dehydrogenase, mitochondrial OS=Homo sapiens GN=MDH2 PE=1 SV=3	0.978221	1.32684	1.51235	0.773874	1.00362	0.653948	1.27247	0.810479	0.461993
Q9H8H3	MET7A	Methyltransferase-like protein 7A OS=Homo sapiens GN=METTL7A PE=1 SV=1		1.30102	1.73787		-0.340361	-0.0375235	1.51945	-0.188942	1.70839
Q08431	MFGM	Lactadherin OS=Homo sapiens GN=MFGE8 PE=1 SV=2	0.147653	0.556043	0.796047	0.739684	0.432708	-0.00531646	0.499914	0.389025	0.110889
P10620	MGST1	Microsomal glutathione S-transferase 1 OS=Homo sapiens GN=MGST1 PE=1 SV=1	0.886852	0.706458	0.588114	-0.75178	-1.07828	-0.783009	0.727142	-0.871024	1.59817
P19105	ML12A	Myosin regulatory light chain 12A OS=Homo sapiens GN=MYL12A PE=1 SV=2	0.720012	0.516259	0.662257	1.49838	1.1009	1.06452	0.632843	1.22127	-0.588423
O14950	ML12B	Myosin regulatory light chain 12B OS=Homo sapiens GN=MYL12B PE=1 SV=2	0.720012	0.516259	0.662257	1.49838	1.1009	1.06452	0.632843	1.22127	-0.588423
P26038	MOES	Moesin OS=Homo sapiens GN=MSN PE=1 SV=3	1.12814	0.383509	0.460995	1.3654	0.616213	1.41831	0.657548	1.13331	-0.475757
Q14764	MVP	Major vault protein OS=Homo sapiens GN=MVP PE=1 SV=4	0.976113	0.678823	0.272899	0.588002	0.104904	0.781085	0.642612	0.49133	0.151281
P84157	MXRA7	Matrix-remodeling-associated protein 7 OS=Homo sapiens GN=MXRA7 PE=1 SV=1	-0.467583	0.223442	0.448682	-0.107339	0.262048	0.232308	0.0681802	0.129006	-0.0608254
P35580	MYH10	Myosin-10 OS=Homo sapiens GN=MYH10 PE=1 SV=3	0.808246	0.831801	0.646232	0.858479	1.03788	0.688615	0.762093	0.861659	-0.0995661
P35749	MYH11	Myosin-11 OS=Homo sapiens GN=MYH11 PE=1 SV=3	0.777461	0.748899	0.427005	0.380345	0.711055	0.203088	0.651122	0.431496	0.219625
P35579	MYH9	Myosin-9 OS=Homo sapiens GN=MYH9 PE=1 SV=4	1.5262	1.5081	1.34871	1.89451	1.69985	1.71348	1.46101	1.76928	-0.308273
P05976	MYL1	Myosin light chain 1/3, skeletal muscle isoform OS=Homo sapiens GN=MYL1 PE=1 SV=3	0.0731598	-0.0110631	0.0740256	0.65807	1.68143	0.192814	0.0453741	0.844103	-0.798729
P08590	MYL3	Myosin light chain 3 OS=Homo sapiens GN=MYL3 PE=1 SV=3	0.0731598	-0.0110631	0.0740256	0.65807	1.68143	0.192814	0.0453741	0.844103	-0.798729
P14649	MYL6B	Myosin light chain 6B OS=Homo sapiens GN=MYL6B PE=1 SV=1	0.0413985	-0.0162851	0.313673	0.905112	1.35031	0.277023	0.112929	0.844149	-0.731221
P24844	MYL9	Myosin regulatory light polypeptide 9 OS=Homo sapiens GN=MYL9 PE=1 SV=4	0.828729	0.685267	0.54354	1.43129	0.958791	1.1746	0.685846	1.18823	-0.502381
O00159	MYO1C	Myosin-Ic OS=Homo sapiens GN=MYO1C PE=1 SV=4	0.184043	0.666761	0.203535	2.09846	0.753579	0.228151	0.351447	1.02673	-0.675284
Q9NZM1	MYOF	Myoferlin OS=Homo sapiens GN=MYOF PE=1 SV=1	0.145967	0.901734	0.692089	-0.0888792	-0.0153982	-0.26546	0.57993	-0.123246	0.703176
O14974	MYPT1	Protein phosphatase 1 regulatory subunit 12A OS=Homo sapiens GN=PPP1R12A PE=1 SV=1	-0.0335231	-0.0816372	0.111379	0.430963	-0.0410439	0.583807	-0.00126052	0.324575	-0.325836
Q13765	NACA	Nascent polypeptide-associated complex subunit alpha OS=Homo sapiens GN=NACA PE=1 SV=1	0.919043	0.805276	0.0838561	0.129604	-0.0213245	0.243653	0.602725	0.117311	0.485414
P17050	NAGAB	Alpha-N-acetylgalactosaminidase OS=Homo sapiens GN=NAGA PE=1 SV=2	0.115955		1.24835	0.729842		0.301421	0.682153	0.515632	0.166521
Q9UJ70	NAGK	N-acetyl-D-glucosamine kinase OS=Homo sapiens GN=NAGK PE=1 SV=4	1.64212	0.872093	0.868207	1.24181	1.25374	1.47837	1.12747	1.32464	-0.197167
P00387	NB5R3	NADH-cytochrome b5 reductase 3 OS=Homo sapiens GN=CYB5R3 PE=1 SV=3	-0.0463395	1.69887	0.464528	0.00724113	1.56183	-0.299447	0.705684	0.423209	0.282476
Q16718	NDUA5	NADH dehydrogenase [ubiquinone] 1 alpha subcomplex subunit 5 OS=Homo sapiens GN=NDUFA5 PE=1 SV=3	0.254697	0.986868	0.404831	0.0130672	-0.143321	-0.633753	0.548799	-0.254669	0.803468
Q7Z3B1	NEGR1	Neuronal growth regulator 1 OS=Homo sapiens GN=NEGR1 PE=1 SV=3	-0.166543	-0.0386618	0.247586	0.397164	0.642771	0.745286	0.014127	0.595074	-0.580947
Q9UMX5	NENF	Neudesin OS=Homo sapiens GN=NENF PE=1 SV=1	0.626842	0.773542	0.905974	0.527872	0.414913	0.645665	0.768786	0.529483	0.239303
Q9BYT8	NEUL	Neurolysin, mitochondrial OS=Homo sapiens GN=NLN PE=1 SV=1	0.654892	0.168597	0.187805	0.433683	-0.639638	-0.215035	0.337098	-0.14033	0.477428
Q0ZGT2	NEXN	Nexilin OS=Homo sapiens GN=NEXN PE=1 SV=1	0.403176	1.76653	0.496412	0.934859	2.42786	0.292798	0.888705	1.21851	-0.329802
P07197	NFM	Neurofilament medium polypeptide OS=Homo sapiens GN=NEFM PE=1 SV=3	0.165781	0.497376	1.23171	-0.128596	0.603128	0.423025	0.631624	0.299186	0.332438
Q92542	NICA	Nicastrin OS=Homo sapiens GN=NCSTN PE=1 SV=2	0.245261	0.475296	0.99708	0.311383	0.129589	1.74381	0.572546	0.728262	-0.155716
P22307	NLTP	Non-specific lipid-transfer protein OS=Homo sapiens GN=SCP2 PE=1 SV=2	2.05178	-0.764574	-0.794709	1.95955	-1.0894	-0.484389	0.164165	0.128587	0.0355781
P40261	NNMT	Nicotinamide N-methyltransferase OS=Homo sapiens GN=NNMT PE=1 SV=1	1.58907		0.865064	0.343297		1.18238	1.22707	0.76284	0.464227
Q15155	NOMO1	Nodal modulator 1 OS=Homo sapiens GN=NOMO1 PE=1 SV=5	0.580881	0.100104	0.407855	0.452424	-0.15272	-0.281834	0.362947	0.00595657	0.35699
Q5JPE7	NOMO2	Nodal modulator 2 OS=Homo sapiens GN=NOMO2 PE=1 SV=1	0.580881	0.100104	0.407855	0.452424	-0.15272	-0.281834	0.362947	0.00595657	0.35699
P69849	NOMO3	Nodal modulator 3 OS=Homo sapiens GN=NOMO3 PE=2 SV=2	0.580881	0.100104	0.407855	0.452424	-0.15272	-0.281834	0.362947	0.00595657	0.35699
P61916	NPC2	Epididymal secretory protein E1 OS=Homo sapiens GN=NPC2 PE=1 SV=1	1.43545	1.596	1.62513	1.52747	1.86705	0.955122	1.5522	1.44988	0.102316
P06748	NPM	Nucleophosmin OS=Homo sapiens GN=NPM1 PE=1 SV=2	0.4235	0.598737	1.14764	1.03955	1.87063	1.02297	0.723294	1.31105	-0.587755
Q9Y639	NPTN	Neuroplastin OS=Homo sapiens GN=NPTN PE=1 SV=2	0.25897	0.503715	1.4447	1.38924	0.816276	1.19976	0.735797	1.13509	-0.399298
P61970	NTF2	Nuclear transport factor 2 OS=Homo sapiens GN=NUTF2 PE=1 SV=1	0.886727	0.535357	0.982949	1.31813	0.688079	1.64053	0.801678	1.21558	-0.4139
Q02818	NUCB1	Nucleobindin-1 OS=Homo sapiens GN=NUCB1 PE=1 SV=4	0.0620332	-0.107457	0.0579221	0.235662	0.554487	-0.185029	0.00416617	0.201707	-0.19754
P80303	NUCB2	Nucleobindin-2 OS=Homo sapiens GN=NUCB2 PE=1 SV=2		1.1268	0.807964	0.698205	0.815819	1.17236	0.967384	0.895461	0.0719226
P19338	NUCL	Nucleolin OS=Homo sapiens GN=NCL PE=1 SV=3	0.448194	1.24391	0.752136	0.661918	1.19657	0.700085	0.814748	0.852858	-0.0381098
Q9UKK9	NUDT5	ADP-sugar pyrophosphatase OS=Homo sapiens GN=NUDT5 PE=1 SV=1	0.692433	0.506657	0.0358886	0.326057	0.56376	-0.0108691	0.41166	0.292983	0.118677
Q02218	ODO1	2-oxoglutarate dehydrogenase, mitochondrial OS=Homo sapiens GN=OGDH PE=1 SV=3	0.374923	0.811056	0.826269	0.136384	0.17184	0.351454	0.670749	0.219893	0.450857
P36957	ODO2	Dihydrolipoyllysine-residue succinyltransferase component of 2-oxoglutarate dehydrogenase complex, mitochondrial OS=Homo sapiens GN=DLST PE=1 SV=4	0.471569	0.532656	0.80789	0.220041	0.396839	-0.0691078	0.604038	0.182591	0.421448
P08559	ODPA	Pyruvate dehydrogenase E1 component subunit alpha, somatic form, mitochondrial OS=Homo sapiens GN=PDHA1 PE=1 SV=3		0.5331	0.586949		0.0305415	0.178571	0.560024	0.104556	0.455468
P11177	ODPB	Pyruvate dehydrogenase E1 component subunit beta, mitochondrial OS=Homo sapiens GN=PDHB PE=1 SV=3	0.55804	0.666173	0.556729	0.484961	0.702408	-0.0304341	0.593647	0.385645	0.208003
Q32P28	P3H1	Prolyl 3-hydroxylase 1 OS=Homo sapiens GN=LEPRE1 PE=1 SV=2	0.360778	0.74004	0.704008	-0.0115129	0.481626	-0.0381929	0.601609	0.143973	0.457635
P13674	P4HA1	Prolyl 4-hydroxylase subunit alpha-1 OS=Homo sapiens GN=P4HA1 PE=1 SV=2	1.22771	1.14949	1.45005	1.28168	1.26529	0.991065	1.27575	1.17934	0.0964039
P54886	P5CS	Delta-1-pyrroline-5-carboxylate synthase OS=Homo sapiens GN=ALDH18A1 PE=1 SV=2		-0.714147	0.672874		-0.891671	1.77625	-0.0206364	0.44229	-0.462926
P11940	PABP1	Polyadenylate-binding protein 1 OS=Homo sapiens GN=PABPC1 PE=1 SV=2	0.319645	1.05482	0.475906	0.603065	1.04817	-0.0740593	0.616789	0.525725	0.0910645
Q13310	PABP4	Polyadenylate-binding protein 4 OS=Homo sapiens GN=PABPC4 PE=1 SV=1	1.54919		0.875389	1.58068		0.92923	1.21229	1.25496	-0.0426653
Q8NCC3	PAG15	Group XV phospholipase A2 OS=Homo sapiens GN=PLA2G15 PE=1 SV=2	0.167902	0.906412	0.870622	0.317281	0.739891	-0.264929	0.648312	0.264081	0.384231
Q8NC51	PAIRB	Plasminogen activator inhibitor 1 RNA-binding protein OS=Homo sapiens GN=SERBP1 PE=1 SV=2	0.589466	0.831362	0.178972	0.256225	0.124139	0.3883	0.533267	0.256221	0.277045
Q9Y536	PAL4A	Peptidylprolyl cis-trans isomerase A-like 4A/B/C OS=Homo sapiens GN=PPIAL4A PE=1 SV=1	0.696984	-0.567057	0.163041	1.61958	1.11749	0.534223	0.0976558	1.09043	-0.992775
Q8IXS6	PALM2	Paralemmin-2 OS=Homo sapiens GN=PALM2 PE=1 SV=3	-0.134595	-0.0903016	0.2943	-0.122771	0.276619	-0.0719217	0.0231347	0.0273087	-0.00417406
Q99497	PARK7	Protein DJ-1 OS=Homo sapiens GN=PARK7 PE=1 SV=2	1.80139	0.169381	0.824998	1.15348	-0.260769	0.694948	0.931922	0.529219	0.402702
Q96IZ0	PAWR	PRKC apoptosis WT1 regulator protein OS=Homo sapiens GN=PAWR PE=1 SV=1	0.203762	0.310646	0.15542	0.323739	0.243999	0.727597	0.223276	0.431778	-0.208503
Q15365	PCBP1	Poly(rC)-binding protein 1 OS=Homo sapiens GN=PCBP1 PE=1 SV=2	0.113925	-0.144677	-0.275315	0.370102	0.104983	0.87727	-0.102023	0.450785	-0.552808
Q16822	PCKGM	Phosphoenolpyruvate carboxykinase [GTP], mitochondrial OS=Homo sapiens GN=PCK2 PE=1 SV=3	-0.0367452	0.462552	0.640118	-0.671376	0.0604976	-1.10193	0.355308	-0.570937	0.926246
P42785	PCP	Lysosomal Pro-X carboxypeptidase OS=Homo sapiens GN=PRCP PE=1 SV=1	0.097674	0.357428	0.82901	0.735371	1.24183	0.938019	0.428037	0.971742	-0.543704
Q9UHG3	PCYOX	Prenylcysteine oxidase 1 OS=Homo sapiens GN=PCYOX1 PE=1 SV=3	0.509823	1.34724	1.25641	-0.0978558	1.01938	0.552036	1.03782	0.491185	0.546636
P07237	PDIA1	Protein disulfide-isomerase OS=Homo sapiens GN=P4HB PE=1 SV=3	7.14829	7.30046	4.42267	7.74631	7.65348	4.95111	6.29047	6.78363	-0.493161
P30101	PDIA3	Protein disulfide-isomerase A3 OS=Homo sapiens GN=PDIA3 PE=1 SV=4	0.686087	0.618369	1.14197	1.25439	1.46338	0.734574	0.815475	1.15078	-0.335306
P13667	PDIA4	Protein disulfide-isomerase A4 OS=Homo sapiens GN=PDIA4 PE=1 SV=2	0.471678	0.395833	0.543403	0.750406	0.796869	0.655558	0.470305	0.734278	-0.263973
Q15084	PDIA6	Protein disulfide-isomerase A6 OS=Homo sapiens GN=PDIA6 PE=1 SV=1	0.619476	1.30495	0.943954	1.10573	0.717027	1.46305	0.956127	1.09527	-0.139144
O00151	PDLI1	PDZ and LIM domain protein 1 OS=Homo sapiens GN=PDLIM1 PE=1 SV=4	0.46363	0.907146	1.44826	0.629684	1.94682	1.03943	0.939678	1.20531	-0.265633
P50479	PDLI4	PDZ and LIM domain protein 4 OS=Homo sapiens GN=PDLIM4 PE=1 SV=2	-0.0153873	-0.00353769	-0.13119	-0.00235912	0.659063	0.487971	-0.0500383	0.381559	-0.431597
Q96HC4	PDLI5	PDZ and LIM domain protein 5 OS=Homo sapiens GN=PDLIM5 PE=1 SV=5	0.514023	0.142987	0.309634	0.535749	1.44148	0.559549	0.322215	0.845591	-0.523376
Q9NR12	PDLI7	PDZ and LIM domain protein 7 OS=Homo sapiens GN=PDLIM7 PE=1 SV=1		0.349374	0.349064		1.22508	0.72335	0.349219	0.974217	-0.624998
P30086	PEBP1	Phosphatidylethanolamine-binding protein 1 OS=Homo sapiens GN=PEBP1 PE=1 SV=3	1.62072	0.237734	0.114053	0.665979	-0.197518	0.437626	0.657501	0.302029	0.355472
P18669	PGAM1	Phosphoglycerate mutase 1 OS=Homo sapiens GN=PGAM1 PE=1 SV=2	1.98333	0.714805	0.705784	1.6437	0.508648	1.3287	1.13464	1.16035	-0.0257068
P15259	PGAM2	Phosphoglycerate mutase 2 OS=Homo sapiens GN=PGAM2 PE=1 SV=3	1.4482	0.703025	0.995157	1.63818	0.983279	1.34395	1.04879	1.32181	-0.273012
Q8N0Y7	PGAM4	Probable phosphoglycerate mutase 4 OS=Homo sapiens GN=PGAM4 PE=1 SV=1	1.25884	0.703025	0.995157	1.48702	0.983279	1.34395	0.985675	1.27142	-0.285744
P98160	PGBM	Basement membrane-specific heparan sulfate proteoglycan core protein OS=Homo sapiens GN=HSPG2 PE=1 SV=4	-0.0797693	0.0981817	0.605976	-0.258596	0.511872	0.48416	0.208129	0.245812	-0.0376828
Q9Y646	PGCP	Plasma glutamate carboxypeptidase OS=Homo sapiens GN=PGCP PE=1 SV=1	-0.285716	-0.171074	0.0139139	0.665183	1.25551	0.802423	-0.147625	0.907705	-1.05533
P00558	PGK1	Phosphoglycerate kinase 1 OS=Homo sapiens GN=PGK1 PE=1 SV=3	1.36324	0.488897	0.654533	1.49245	0.767209	1.6042	0.835556	1.28795	-0.452398
P36871	PGM1	Phosphoglucomutase-1 OS=Homo sapiens GN=PGM1 PE=1 SV=3	1.18746	0.0573286	0.0146093	0.56744	-0.177919	0.445853	0.419801	0.278458	0.141343
O00264	PGRC1	Membrane-associated progesterone receptor component 1 OS=Homo sapiens GN=PGRMC1 PE=1 SV=3	0.491402	0.631977	1.3773	0.485666	-0.262805	1.0973	0.833561	0.440055	0.393506
O15173	PGRC2	Membrane-associated progesterone receptor component 2 OS=Homo sapiens GN=PGRMC2 PE=1 SV=1	0.0560294	0.443934	1.23541	1.37001	0.778789	1.04971	0.578459	1.06617	-0.487708
Q9NRX4	PHP14	14 kDa phosphohistidine phosphatase OS=Homo sapiens GN=PHPT1 PE=1 SV=1	0.510155	0.302266	0.692153	0.88073	0.154208	1.366	0.501525	0.800311	-0.298786
Q6UXB8	PI16	Peptidase inhibitor 16 OS=Homo sapiens GN=PI16 PE=1 SV=1	0.0759378	-0.123667	0.508218	1.45017	1.18047	0.563185	0.153496	1.06461	-0.91111
Q8NHP8	PLBL2	Putative phospholipase B-like 2 OS=Homo sapiens GN=PLBD2 PE=1 SV=2	0.580267	0.438595	0.726082	0.524741	1.08726	0.99527	0.581648	0.869089	-0.287441
P51178	PLCD1	1-phosphatidylinositol-4,5-bisphosphate phosphodiesterase delta-1 OS=Homo sapiens GN=PLCD1 PE=1 SV=2	0.79754	0.17741	0.122839	0.535729	-1.23657	0.630056	0.36593	-0.0235947	0.389524
Q8IV08	PLD3	Phospholipase D3 OS=Homo sapiens GN=PLD3 PE=1 SV=1	0.175355	0.714081	0.542053	0.345829	1.38811	-0.134064	0.477163	0.533291	-0.056128
Q96Q06	PLIN4	Perilipin-4 OS=Homo sapiens GN=PLIN4 PE=2 SV=2	1.07209	1.39949	1.36494	-0.864251	0.80556	-0.637174	1.27884	-0.231955	1.5108
Q02809	PLOD1	Procollagen-lysine,2-oxoglutarate 5-dioxygenase 1 OS=Homo sapiens GN=PLOD1 PE=1 SV=2	1.10555	0.945366	1.50765	0.911056	1.02267	1.74027	1.18619	1.22466	-0.0384764
O60568	PLOD3	Procollagen-lysine,2-oxoglutarate 5-dioxygenase 3 OS=Homo sapiens GN=PLOD3 PE=1 SV=1	0.545278	0.607762	0.853933	0.308962	1.12611	-0.133501	0.668991	0.433856	0.235135
P13796	PLSL	Plastin-2 OS=Homo sapiens GN=LCP1 PE=1 SV=6	0.462941	0.126167	-0.166005	0.0265044	0.376407	0.476378	0.141034	0.293096	-0.152062
P13797	PLST	Plastin-3 OS=Homo sapiens GN=PLS3 PE=1 SV=4	0.738187	0.1657	-0.243363	0.241664	-0.0229525	0.53111	0.220175	0.24994	-0.0297656
Q6S8J3	POTEE	POTE ankyrin domain family member E OS=Homo sapiens GN=POTEE PE=1 SV=3	0.762508	0.804509	1.41337	1.38916	1.32955	1.58763	0.993464	1.43545	-0.441983
A5A3E0	POTEF	POTE ankyrin domain family member F OS=Homo sapiens GN=POTEF PE=1 SV=2	0.72097	0.857138	1.42186	1.45714	1.42405	1.31176	0.999989	1.39765	-0.397664
P0CG38	POTEI	POTE ankyrin domain family member I OS=Homo sapiens GN=POTEI PE=3 SV=1	1.03559	0.933871	1.58789	1.45714	1.64143	1.12185	1.18578	1.40681	-0.221025
P0CG39	POTEJ	POTE ankyrin domain family member J OS=Homo sapiens GN=POTEJ PE=3 SV=1	1.03559	1.0106	1.33052	1.56863	1.42405	1.12185	1.12557	1.37151	-0.245939
P67775	PP2AA	Serine/threonine-protein phosphatase 2A catalytic subunit alpha isoform OS=Homo sapiens GN=PPP2CA PE=1 SV=1	0.956871	1.01478	1.68821	0.000209112	1.51169	2.86478	1.21995	1.45889	-0.238938
P62714	PP2AB	Serine/threonine-protein phosphatase 2A catalytic subunit beta isoform OS=Homo sapiens GN=PPP2CB PE=1 SV=1	0.956871	1.01478	1.68821	0.000209112	1.51169	2.86478	1.21995	1.45889	-0.238938
P11117	PPAL	Lysosomal acid phosphatase OS=Homo sapiens GN=ACP2 PE=1 SV=3	-0.306347	0.2364	1.02025	0.632732	1.09438	1.09081	0.316767	0.939307	-0.62254
P05186	PPBT	Alkaline phosphatase, tissue-nonspecific isozyme OS=Homo sapiens GN=ALPL PE=1 SV=4		0.504393	0.776396		1.10545	1.11681	0.640394	1.11113	-0.470735
P10619	PPGB	Lysosomal protective protein OS=Homo sapiens GN=CTSA PE=1 SV=2	0.551765	0.533717	0.827492	0.710102	0.652731	0.565123	0.637658	0.642652	-0.00499371
P62937	PPIA	Peptidyl-prolyl cis-trans isomerase A OS=Homo sapiens GN=PPIA PE=1 SV=2	0.76545	0.113896	-0.0255762	0.814101	0.349491	0.431284	0.28459	0.531625	-0.247035
P23284	PPIB	Peptidyl-prolyl cis-trans isomerase B OS=Homo sapiens GN=PPIB PE=1 SV=2	1.02987	0.984028	1.45461	1.30051	1.38095	1.25213	1.15617	1.3112	-0.155027
O15355	PPM1G	Protein phosphatase 1G OS=Homo sapiens GN=PPM1G PE=1 SV=1	0.21827	0.0815329		-0.0395417	-0.305551		0.149901	-0.172546	0.322448
Q96EM0	PRCM	Probable proline racemase OS=Homo sapiens GN=C14orf149 PE=1 SV=2	0.735843	-0.303536	-0.624249	0.511459	0.0384087	0.253281	-0.0639808	0.267716	-0.331697
Q969G5	PRDBP	Protein kinase C delta-binding protein OS=Homo sapiens GN=PRKCDBP PE=1 SV=3	-0.0188223	0.440933	0.649209	0.375693	1.17833	0.436361	0.357107	0.66346	-0.306354
Q06830	PRDX1	Peroxiredoxin-1 OS=Homo sapiens GN=PRDX1 PE=1 SV=1	1.26128	-0.30321	0.275068	0.166297	-0.565378	-0.0677355	0.411045	-0.155605	0.56665
P32119	PRDX2	Peroxiredoxin-2 OS=Homo sapiens GN=PRDX2 PE=1 SV=5	0.727236	0.230996	0.315318	0.293645	0.0427592	0.115351	0.424516	0.150585	0.273931
P30048	PRDX3	Thioredoxin-dependent peroxide reductase, mitochondrial OS=Homo sapiens GN=PRDX3 PE=1 SV=3	0.60561	0.66283	1.44753	1.18676	0.920456	1.40761	0.905324	1.17161	-0.266287
Q13162	PRDX4	Peroxiredoxin-4 OS=Homo sapiens GN=PRDX4 PE=1 SV=1	2.19948	0.15905	0.769154	2.49601	-0.181076	0.949181	1.04256	1.08804	-0.045477
P30044	PRDX5	Peroxiredoxin-5, mitochondrial OS=Homo sapiens GN=PRDX5 PE=1 SV=4	0.537948	1.03636	1.04681	1.2169	0.831607	1.48648	0.873704	1.17833	-0.304625
P30041	PRDX6	Peroxiredoxin-6 OS=Homo sapiens GN=PRDX6 PE=1 SV=3	1.71748	1.21071	1.07931	0.912315	0.194509	0.625643	1.33583	0.577489	0.758344
P07737	PROF1	Profilin-1 OS=Homo sapiens GN=PFN1 PE=1 SV=2	1.34354	0.683967	0.728287	1.59079	1.11803	1.28634	0.9186	1.33172	-0.413119
P62333	PRS10	26S protease regulatory subunit 10B OS=Homo sapiens GN=PSMC6 PE=1 SV=1	0.938276		0.331738	0.663431		0.567116	0.635007	0.615274	0.0197332
P62191	PRS4	26S protease regulatory subunit 4 OS=Homo sapiens GN=PSMC1 PE=1 SV=1	0.818228	0.836541	0.284792	0.379243	0.139175	-0.0488023	0.64652	0.156538	0.489982
P17980	PRS6A	26S protease regulatory subunit 6A OS=Homo sapiens GN=PSMC3 PE=1 SV=3	0.7093	0.39617	0.353805	0.129708	-0.610388	0.207807	0.486425	-0.0909577	0.577383
P35998	PRS7	26S protease regulatory subunit 7 OS=Homo sapiens GN=PSMC2 PE=1 SV=3	0.712356	0.397856	0.173934	0.0811375	-0.46876	-0.250822	0.428049	-0.212815	0.640864
P62195	PRS8	26S protease regulatory subunit 8 OS=Homo sapiens GN=PSMC5 PE=1 SV=1	0.945444	0.808206	0.321793	0.333336	0.115112	-0.0247392	0.691814	0.141236	0.550578
P55786	PSA	Puromycin-sensitive aminopeptidase OS=Homo sapiens GN=NPEPPS PE=1 SV=2	0.578716	0.726568	0.423572	1.40155	0.398363	1.88709	0.576286	1.229	-0.652715
P25788	PSA3	Proteasome subunit alpha type-3 OS=Homo sapiens GN=PSMA3 PE=1 SV=2	0.367512	0.164942	0.344057	0.555877	1.53713	0.460168	0.29217	0.851059	-0.558888
P25789	PSA4	Proteasome subunit alpha type-4 OS=Homo sapiens GN=PSMA4 PE=1 SV=1	0.604314		0.0474525	0.218834		0.583242	0.325883	0.401038	-0.0751548
P28066	PSA5	Proteasome subunit alpha type-5 OS=Homo sapiens GN=PSMA5 PE=1 SV=3	0.372511	0.0845548	0.146597	0.224682	0.251239	0.240278	0.201221	0.238733	-0.0375117
P60900	PSA6	Proteasome subunit alpha type-6 OS=Homo sapiens GN=PSMA6 PE=1 SV=1	0.11984	-0.171862	0.182458	0.334206	0.322777	0.557696	0.0434785	0.404893	-0.361415
O14818	PSA7	Proteasome subunit alpha type-7 OS=Homo sapiens GN=PSMA7 PE=1 SV=1	0.870562	0.416462	0.268304	0.627927	-0.163955	0.399836	0.518443	0.287936	0.230507
Q8TAA3	PSA7L	Proteasome subunit alpha type-7-like OS=Homo sapiens GN=PSMA8 PE=1 SV=3	0.422359	0.0504314	0.0292779	0.354509	-0.0538108	-0.122987	0.167356	0.0592372	0.108119
P20618	PSB1	Proteasome subunit beta type-1 OS=Homo sapiens GN=PSMB1 PE=1 SV=2	1.20483	1.15557	1.39405	1.3772	1.40118	1.45162	1.25148	1.41	-0.158518
P28070	PSB4	Proteasome subunit beta type-4 OS=Homo sapiens GN=PSMB4 PE=1 SV=4	0.596702	0.963147	0.930833	0.794768	-0.0683372	1.49613	0.830227	0.740854	0.0893733
P28074	PSB5	Proteasome subunit beta type-5 OS=Homo sapiens GN=PSMB5 PE=1 SV=3	-0.0035209	-0.407266	-0.272883	0.651854	0.835778	0.422302	-0.22789	0.636645	-0.864535
P28072	PSB6	Proteasome subunit beta type-6 OS=Homo sapiens GN=PSMB6 PE=1 SV=4	0.345823	0.416497	0.542097	0.535695	1.06349	-0.0994139	0.434806	0.499924	-0.0651185
O00231	PSD11	26S proteasome non-ATPase regulatory subunit 11 OS=Homo sapiens GN=PSMD11 PE=1 SV=3	1.31345	0.0905122	0.156448	-0.68071	-1.7952	1.1302	0.520138	-0.44857	0.968709
Q13200	PSMD2	26S proteasome non-ATPase regulatory subunit 2 OS=Homo sapiens GN=PSMD2 PE=1 SV=3	0.601316	0.335275	0.798951	0.342063	0.354624	0.823433	0.578514	0.506707	0.0718072
O43242	PSMD3	26S proteasome non-ATPase regulatory subunit 3 OS=Homo sapiens GN=PSMD3 PE=1 SV=2	1.03424	0.618773	0.314273	0.0676789	-0.649997	0.518146	0.655762	-0.0213907	0.677153
P55036	PSMD4	26S proteasome non-ATPase regulatory subunit 4 OS=Homo sapiens GN=PSMD4 PE=1 SV=1	0.604182	0.510937	0.532701	0.616064	0.601766	0.0674383	0.549273	0.428423	0.12085
O00233	PSMD9	26S proteasome non-ATPase regulatory subunit 9 OS=Homo sapiens GN=PSMD9 PE=1 SV=3	0.923018	1.52534	0.578184	0.491978	-0.214464	1.32669	1.00885	0.534735	0.474111
Q6NZI2	PTRF	Polymerase I and transcript release factor OS=Homo sapiens GN=PTRF PE=1 SV=1	0.185593	0.43715	0.424603	0.422996	0.624742	0.166781	0.349115	0.40484	-0.0557242
P26022	PTX3	Pentraxin-related protein PTX3 OS=Homo sapiens GN=PTX3 PE=1 SV=3	-0.0834713	0.552123	-0.0378939	-0.196153	0.280571	-0.206593	0.143586	-0.0407249	0.184311
P31939	PUR9	Bifunctional purine biosynthesis protein PURH OS=Homo sapiens GN=ATIC PE=1 SV=3	1.47541	0.783137	-0.000452297	0.858844	0.356071	0.945369	0.752698	0.720095	0.0326034
P30520	PURA2	Adenylosuccinate synthetase isozyme 2 OS=Homo sapiens GN=ADSS PE=1 SV=3	1.35412	0.344262	-0.186743	1.83929	0.265191	0.879571	0.503878	0.994686	-0.490807
P11216	PYGB	Glycogen phosphorylase, brain form OS=Homo sapiens GN=PYGB PE=1 SV=5	0.948579	0.985824	-0.770074	0.730615	0.882591	0.185885	0.38811	0.599697	-0.211587
P06737	PYGL	Glycogen phosphorylase, liver form OS=Homo sapiens GN=PYGL PE=1 SV=4	1.47794	-1.18547	-0.370948	0.0425603	-1.87357	0.185885	-0.0261572	-0.548375	0.522217
P20742	PZP	Pregnancy zone protein OS=Homo sapiens GN=PZP PE=1 SV=4	0.33364	0.723313	0.723236	0.00987635	0.0500214	-0.398856	0.593396	-0.112986	0.706382
Q17RZ5	Q17RZ5	Kinectin 1 (Kinesin receptor) OS=Homo sapiens GN=KTN1 PE=2 SV=1	0.23419	0.416812	0.516023	0.112998	0.430956	0.372694	0.389008	0.305549	0.0834591
Q1HE25	Q1HE25	Actinin alpha 1 isoform b OS=Homo sapiens GN=ACTN1 PE=2 SV=1	1.06601	1.05889	0.971634	1.61361	1.15693	1.97862	1.03218	1.58305	-0.550873
Q1L6K4	Q1L6K4	Apoptosis-inducing factor short isoform 3 OS=Homo sapiens GN=PDCD8 PE=2 SV=1	0.203808	0.887952	0.730892	0.201789	0.211994	-0.334032	0.607551	0.0265835	0.580967
Q1L6K6	Q1L6K6	Apoptosis-inducing factor short isoform 2 OS=Homo sapiens GN=PDCD8 PE=2 SV=1	0.203808	0.887952	0.730892	0.201789	0.211994	-0.334032	0.607551	0.0265835	0.580967
Q2L7G6	Q2L7G6	Heterogeneous nuclear ribonucleoprotein-R2 OS=Homo sapiens GN=HNRNPR PE=2 SV=1	0.265417	0.390863	0.470356	0.267842	-0.0852037	0.443879	0.375545	0.208839	0.166706
Q3B7A4	Q3B7A4	RPLP0 protein OS=Homo sapiens GN=RPLP0 PE=2 SV=1	0.458226	0.392349	0.424761	-0.591924	-0.536551	-0.0685021	0.425112	-0.398992	0.824104
Q3BDU5	Q3BDU5	Rhabdomyosarcoma antigen MU-RMS-40.12 OS=Homo sapiens GN=LMNA PE=2 SV=1	0.251163	0.754917	1.38458	0.720274	1.30761	0.547957	0.796888	0.858614	-0.0617262
Q3KNR6	Q3KNR6	ST13 protein OS=Homo sapiens GN=ST13 PE=2 SV=1	1.03929	0.329484	0.272714	0.370796	0.3358	-0.0750678	0.547162	0.21051	0.336652
Q3MIV8	Q3MIV8	Myosin, heavy chain 11, smooth muscle OS=Homo sapiens GN=MYH11 PE=2 SV=1	0.777461	0.748899	0.427005	0.380345	0.711055	0.203088	0.651122	0.431496	0.219625
Q3MNF0	Q3MNF0	Myosin, heavy chain 11, smooth muscle OS=Homo sapiens GN=MYH11 PE=2 SV=1	0.777461	0.748899	0.427005	0.380345	0.711055	0.203088	0.651122	0.431496	0.219625
Q3MNF1	Q3MNF1	Smooth muscle myosin heavy chain isoform SM1 OS=Homo sapiens GN=MYH11 PE=2 SV=1	0.777461	0.748899	0.427005	0.380345	0.711055	0.203088	0.651122	0.431496	0.219625
Q4G177	Q4G177	NOMO2 protein OS=Homo sapiens GN=NOMO2 PE=2 SV=1	0.580881	0.100104	0.407855	0.452424	-0.15272	-0.281834	0.362947	0.00595657	0.35699
Q4VBZ6	Q4VBZ6	EEF1D protein OS=Homo sapiens GN=EEF1D PE=1 SV=1	0.451657	0.982312	0.466604	0.431935	1.41202	0.084206	0.633524	0.642719	-0.00919434
Q4VC03	Q4VC03	PABPC4 protein OS=Homo sapiens GN=PABPC4 PE=2 SV=1	1.54919		0.875389	1.58068		0.92923	1.21229	1.25496	-0.0426653
Q4VY19	Q4VY19	Tyrosine 3-monooxygenase/tryptophan 5-monooxygenase activation protein, beta polypeptide (Fragment) OS=Homo sapiens GN=YWHAB PE=2 SV=1	0.863326	0.410003	-0.132383	0.576156	1.10072	0.721193	0.380316	0.799355	-0.41904
Q4VY20	Q4VY20	Tyrosine 3-monooxygenase/tryptophan 5-monooxygenase activation protein, beta polypeptide (Fragment) OS=Homo sapiens GN=YWHAB PE=2 SV=1	0.863326	0.410003	-0.132383	0.576156	1.10072	0.721193	0.380316	0.799355	-0.41904
Q53FA3	Q53FA3	Heat shock 70kDa protein 1-like (Fragment) OS=Homo sapiens GN=HSPA1L PE=2 SV=1	0.588559	0.932431	0.519708	0.477486	0.520305	0.461531	0.680233	0.486441	0.193792
Q567Q0	Q567Q0	Peptidylprolyl isomerase A (Cyclophilin A) OS=Homo sapiens GN=PPIA PE=2 SV=1	1.27189	0.328788	-0.0510381	0.715953	0.0683514	0.480919	0.516545	0.421741	0.0948041
Q567Q5	Q567Q5	PSMA4 protein OS=Homo sapiens GN=PSMA4 PE=2 SV=1	0.53229		-0.469752	0.167073		0.421054	0.0312692	0.294063	-0.262794
Q569J8	Q569J8	HNRPC protein OS=Homo sapiens GN=HNRPC PE=2 SV=1	0.379694	0.370006	0.543502	0.281173	0.655103	-0.559398	0.431067	0.125626	0.305441
Q5BJH1	Q5BJH1	PSAP protein OS=Homo sapiens GN=PSAP PE=2 SV=1	0.295843	1.20974	1.71767	0.860706	1.20069	0.443388	1.07442	0.834929	0.239489
Q5BKV1	Q5BKV1	MYH9 protein OS=Homo sapiens GN=MYH9 PE=2 SV=1	1.04473	0.825223	0.371413	0.832437	-0.0291653	1.51723	0.747121	0.7735	-0.0263795
Q5HY54	Q5HY54	Filamin A, alpha (Actin binding protein 280) OS=Homo sapiens GN=FLNA PE=2 SV=1	2.94759	2.97259	2.4973	2.67073	2.75147	2.96025	2.80583	2.79415	0.0116726
Q5JP53	Q5JP53	Tubulin beta polypeptide OS=Homo sapiens GN=TUBB PE=3 SV=1	1.59938	1.32071	1.18126	1.55786	0.87094	1.76225	1.36712	1.39702	-0.0299011
Q5JR01	Q5JR01	Eukaryotic translation elongation factor 1 alpha 1 (Fragment) OS=Homo sapiens GN=EEF1A1 PE=2 SV=1	1.20582	0.377936	-0.0487591	-0.0645093	-0.0866234	-0.0704029	0.511665	-0.0738452	0.585511
Q5JR05	Q5JR05	Ras homolog gene family, member C OS=Homo sapiens GN=RHOC PE=1 SV=1		0.358341	1.22052		2.69523	0.269577	0.789429	1.48241	-0.692977
Q5JR06	Q5JR06	Ras homolog gene family, member C (Fragment) OS=Homo sapiens GN=RHOC PE=2 SV=1		0.431156	0.76432		4.08534	-0.107361	0.597738	1.98899	-1.39125
Q5JR07	Q5JR07	Ras homolog gene family, member C (Fragment) OS=Homo sapiens GN=RHOC PE=2 SV=1		0.358341	1.22052		2.69523	0.269577	0.789429	1.48241	-0.692977
Q5JR08	Q5JR08	Ras homolog gene family, member C (Fragment) OS=Homo sapiens GN=RHOC PE=2 SV=1		0.358341	1.22052		2.69523	0.269577	0.789429	1.48241	-0.692977
Q5JR95	Q5JR95	Ribosomal protein S8 OS=Homo sapiens GN=RPS8 PE=4 SV=1	0.603081	0.838341	0.935342	0.125133	0.853787	1.27248	0.792254	0.750466	0.041788
Q5JWU6	Q5JWU6	Tumor protein D52-like 2 OS=Homo sapiens GN=TPD52L2 PE=2 SV=1	0.593683	0.165803	0.00742844	0.229038	-0.74439	0.327063	0.255638	-0.0627628	0.318401
Q5JXH7	Q5JXH7	Four and a half LIM domains 1 (Fragment) OS=Homo sapiens GN=FHL1 PE=2 SV=1	0.683778	0.70328	0.760422	-0.306694	0.177826	0.656438	0.715827	0.175856	0.53997
Q5JXH8	Q5JXH8	Four and a half LIM domains 1 (Fragment) OS=Homo sapiens GN=FHL1 PE=2 SV=1	0.683778	0.70328	0.760422	-0.306694	0.177826	0.656438	0.715827	0.175856	0.53997
Q5JXH9	Q5JXH9	Four and a half LIM domains 1 (Fragment) OS=Homo sapiens GN=FHL1 PE=2 SV=1	0.683778	0.70328	0.927692	-0.306694	0.177826	0.797308	0.771584	0.222813	0.548771
Q5JXI0	Q5JXI0	Four and a half LIM domains 1 (Fragment) OS=Homo sapiens GN=FHL1 PE=2 SV=1	0.446502	0.639989	1.06692	-0.336925	-0.463132	0.656438	0.717804	-0.0478732	0.765677
Q5JXI2	Q5JXI2	Four and a half LIM domains 1 OS=Homo sapiens GN=FHL1 PE=2 SV=1	0.683778	0.70328	0.760422	-0.306694	0.177826	0.656438	0.715827	0.175856	0.53997
Q5JXI3	Q5JXI3	Four and a half LIM domains 1 (Fragment) OS=Homo sapiens GN=FHL1 PE=2 SV=1	0.683778	0.70328	0.760422	-0.306694	0.177826	0.656438	0.715827	0.175856	0.53997
Q5JXI8	Q5JXI8	Four and a half LIM domains 1 (Fragment) OS=Homo sapiens GN=FHL1 PE=2 SV=1	0.921055	0.70328	0.89337	-0.289533	0.177826	0.745908	0.839235	0.2114	0.627834
Q5JZG9	Q5JZG9	Cathepsin A (Fragment) OS=Homo sapiens GN=CTSA PE=2 SV=1	0.438161	0.533717	0.81813	0.728827	0.652731	0.918688	0.596669	0.766749	-0.170079
Q5JZH0	Q5JZH0	Cathepsin A (Fragment) OS=Homo sapiens GN=CTSA PE=2 SV=1	0.438161	0.533717	0.81813	0.728827	0.652731	0.918688	0.596669	0.766749	-0.170079
Q5LJ98	Q5LJ98	TROVE domain family, member 2 OS=Homo sapiens GN=TROVE2 PE=2 SV=1	0.0479458		-0.114981	0.38741		0.444985	-0.0335178	0.416197	-0.449715
Q5LJ99	Q5LJ99	TROVE domain family, member 2 OS=Homo sapiens GN=TROVE2 PE=2 SV=1	0.0479458		-0.114981	0.38741		0.444985	-0.0335178	0.416197	-0.449715
Q5LJA0	Q5LJA0	TROVE domain family, member 2 OS=Homo sapiens GN=TROVE2 PE=2 SV=1	0.0479458		-0.114981	0.38741		0.444985	-0.0335178	0.416197	-0.449715
Q5SP16	Q5SP16	Heat shock 70kDa protein 1A OS=Homo sapiens GN=HSPA1A PE=3 SV=1	0.859177	0.6103	0.500531	0.423024	0.480545	0.554278	0.65667	0.485949	0.170721
Q5SRR8	Q5SRR8	Dimethylarginine dimethylaminohydrolase 2 OS=Homo sapiens GN=DDAH2 PE=4 SV=2	0.0965306	-1.75522	-0.177464	0.323589	-1.88423	0.0608019	-0.612052	-0.499947	-0.112106
Q5SSV3	Q5SSV3	Dimethylarginine dimethylaminohydrolase 2 OS=Homo sapiens GN=DDAH2 PE=4 SV=1	0.0965306	-1.75522	-0.177464	0.323589	-1.88423	0.0608019	-0.612052	-0.499947	-0.112106
Q5ST81	Q5ST81	Tubulin beta polypeptide OS=Homo sapiens GN=TUBB PE=3 SV=1	1.84416	1.29714	1.28944	1.56891	0.87094	2.16458	1.47691	1.53481	-0.0578955
Q5SWC8	Q5SWC8	Heterochromatin protein 1, binding protein 3 (Fragment) OS=Homo sapiens GN=HP1BP3 PE=2 SV=1	0.334008	0.739363	0.143633	0.987751	0.399575	0.057636	0.405668	0.481654	-0.0759859
Q5SX87	Q5SX87	GDP dissociation inhibitor 2 (Fragment) OS=Homo sapiens GN=GDI2 PE=2 SV=1	0.940528	1.1235	0.448414	0.366945	0.416527	0.458336	0.837482	0.413936	0.423546
Q5SX88	Q5SX88	GDP dissociation inhibitor 2 OS=Homo sapiens GN=GDI2 PE=2 SV=1	0.806415	0.59085	0.621217	0.55384	0.612042	1.53341	0.672827	0.899763	-0.226936
Q5SZ07	Q5SZ07	Hepatoma-derived growth factor (High-mobility group protein 1-like) OS=Homo sapiens GN=HDGF PE=2 SV=1	0.165707	-0.234756	-0.25093	0.223679	-0.483496	0.380579	-0.10666	0.0402539	-0.146914
Q5SZ08	Q5SZ08	Hepatoma-derived growth factor (High-mobility group protein 1-like) OS=Homo sapiens GN=HDGF PE=2 SV=1	0.165707	-0.234756	-0.25093	0.223679	-0.483496	0.380579	-0.10666	0.0402539	-0.146914
Q5T0H7	Q5T0H7	Gelsolin (Amyloidosis, Finnish type) OS=Homo sapiens GN=GSN PE=2 SV=1	0.974012	0.48309	0.154128	0.626436	-0.100402	0.437411	0.537077	0.321148	0.215928
Q5T0H8	Q5T0H8	Gelsolin (Amyloidosis, Finnish type) OS=Homo sapiens GN=GSN PE=2 SV=1	0.974012	0.48309	0.154128	0.626436	-0.100402	0.437411	0.537077	0.321148	0.215928
Q5T0H9	Q5T0H9	Gelsolin (Amyloidosis, Finnish type) OS=Homo sapiens GN=GSN PE=2 SV=1	0.955633	0.465372	0.136409	0.667324	0.084136	0.582161	0.519138	0.44454	0.0745979
Q5T0I0	Q5T0I0	Gelsolin (Amyloidosis, Finnish type) (Fragment) OS=Homo sapiens GN=GSN PE=2 SV=1	0.931357		-0.0890244	0.639574		-0.101445	0.421166	0.269065	0.152102
Q5T0I1	Q5T0I1	Gelsolin (Amyloidosis, Finnish type) (Fragment) OS=Homo sapiens GN=GSN PE=2 SV=1	0.89522		-0.0890244	0.530226		-0.101445	0.403098	0.214391	0.188707
Q5T0R1	Q5T0R1	Adenylyl cyclase-associated protein (Fragment) OS=Homo sapiens GN=CAP1 PE=2 SV=1	1.61795	0.381762	0.0679205	0.781191	-0.161289	0.97641	0.689211	0.532104	0.157107
Q5T0R2	Q5T0R2	Adenylyl cyclase-associated protein (Fragment) OS=Homo sapiens GN=CAP1 PE=2 SV=1	1.61795	0.381762	0.0679205	0.781191	-0.161289	0.97641	0.689211	0.532104	0.157107
Q5T0R3	Q5T0R3	Adenylyl cyclase-associated protein (Fragment) OS=Homo sapiens GN=CAP1 PE=2 SV=1	1.61795	0.381762	0.0679205	0.781191	-0.161289	0.97641	0.689211	0.532104	0.157107
Q5T0R4	Q5T0R4	Adenylyl cyclase-associated protein (Fragment) OS=Homo sapiens GN=CAP1 PE=2 SV=1	1.61795	0.381762	0.0679205	0.781191	-0.161289	0.97641	0.689211	0.532104	0.157107
Q5T0R5	Q5T0R5	Adenylyl cyclase-associated protein (Fragment) OS=Homo sapiens GN=CAP1 PE=2 SV=1	1.61795	0.381762	0.0679205	0.781191	-0.161289	0.97641	0.689211	0.532104	0.157107
Q5T0R6	Q5T0R6	Adenylyl cyclase-associated protein (Fragment) OS=Homo sapiens GN=CAP1 PE=2 SV=1	1.61795	0.381762	0.0679205	0.781191	-0.161289	0.97641	0.689211	0.532104	0.157107
Q5T0R7	Q5T0R7	Adenylyl cyclase-associated protein (Fragment) OS=Homo sapiens GN=CAP1 PE=2 SV=1	1.61795	0.381762	0.0679205	0.781191	-0.161289	0.97641	0.689211	0.532104	0.157107
Q5T0R9	Q5T0R9	Adenylyl cyclase-associated protein (Fragment) OS=Homo sapiens GN=CAP1 PE=2 SV=1	1.61795	0.381762	0.0679205	0.781191	-0.161289	0.97641	0.689211	0.532104	0.157107
Q5T1D7	Q5T1D7	Family with sequence similarity 21, member A (Fragment) OS=Homo sapiens GN=FAM21A PE=4 SV=1	0.304454	0.139616	0.485236	0.443356	-0.0719991	1.01501	0.309769	0.462123	-0.152354
Q5T3N0	Q5T3N0	Annexin A1 (Fragment) OS=Homo sapiens GN=ANXA1 PE=2 SV=1	0.966658	-0.179337	0.28702	0.362193	-1.32503	-0.847783	0.358114	-0.603542	0.961655
Q5T3N1	Q5T3N1	Annexin A1 (Fragment) OS=Homo sapiens GN=ANXA1 PE=2 SV=1	0.994572	0.650159	2.17687	0.655567	0.254388	1.50752	1.27387	0.805825	0.468043
Q5T4U5	Q5T4U5	Acyl-Coenzyme A dehydrogenase, C-4 to C-12 straight chain OS=Homo sapiens GN=ACADM PE=2 SV=1	0.126083	0.585822	0.357417	0.65518	1.44338	0.362532	0.356441	0.820363	-0.463922
Q5T5C7	Q5T5C7	Seryl-tRNA synthetase OS=Homo sapiens GN=SARS PE=2 SV=1	0.600393		-0.770361	0.418735		0.743921	-0.084984	0.581328	-0.666312
Q5T6W1	Q5T6W1	Heterogeneous nuclear ribonucleoprotein K OS=Homo sapiens GN=HNRNPK PE=2 SV=1	0.402045	-1.04007	0.45592	0.124255	-1.60476	0.360182	-0.0607009	-0.373442	0.312741
Q5T6W2	Q5T6W2	Heterogeneous nuclear ribonucleoprotein K (Fragment) OS=Homo sapiens GN=HNRNPK PE=2 SV=1	0.0964035	0.940658	1.76044	1.53351	1.08652	1.32968	0.932501	1.31657	-0.384069
Q5T6W5	Q5T6W5	Heterogeneous nuclear ribonucleoprotein K OS=Homo sapiens GN=HNRNPK PE=2 SV=1	0.576315	1.03354	1.75596	1.25094	1.11628	1.07166	1.12194	1.14629	-0.0243562
Q5T8M7	Q5T8M7	Actin, alpha 1, skeletal muscle OS=Homo sapiens GN=ACTA1 PE=2 SV=1	3.10623	2.95042	3.61298	3.6422	4.70722	3.23138	3.22321	3.86027	-0.637055
Q5T8M8	Q5T8M8	Actin, alpha 1, skeletal muscle OS=Homo sapiens GN=ACTA1 PE=2 SV=1	3.10623	2.96052	3.5253	3.63954	4.70722	3.37371	3.19735	3.90682	-0.709472
Q5T8U2	Q5T8U2	Ribosomal protein L7a OS=Homo sapiens GN=RPL7A PE=4 SV=1	0.342684	0.724181	0.383857	-0.224213	0.41507	-0.0268327	0.483574	0.054675	0.428899
Q5T8U3	Q5T8U3	Ribosomal protein L7a (Fragment) OS=Homo sapiens GN=RPL7A PE=4 SV=1	0.212514	0.429781	0.663238	-0.295789	0.597752	-0.296613	0.435177	0.0017834	0.433394
Q5T946	Q5T946	Glyoxylate reductase/hydroxypyruvate reductase OS=Homo sapiens GN=GRHPR PE=2 SV=1	0.602533	0.168942	0.392973	0.324306	0.3358	0.829634	0.388149	0.49658	-0.108431
Q5T985	Q5T985	Inter-alpha (Globulin) inhibitor H2 OS=Homo sapiens GN=ITIH2 PE=2 SV=1	0.217754	0.355831	0.498299	0.881351	0.253643	-0.231417	0.357295	0.301192	0.0561024
Q5T9W8	Q5T9W8	Heat shock protein 90kDa alpha (Cytosolic), class B member 1 (Fragment) OS=Homo sapiens GN=HSP90AB1 PE=2 SV=1	0.627089	0.28635	-0.0587118	0.000297165	-0.509854	0.45907	0.284909	-0.016829	0.301738
Q5TBN3	Q5TBN3	Lymphocyte cytosolic protein 1 (L-plastin) (Fragment) OS=Homo sapiens GN=LCP1 PE=2 SV=1	0.462941	0.126167	-0.166005	0.0265044	0.376407	0.476378	0.141034	0.293096	-0.152062
Q5TCI8	Q5TCI8	Lamin A/C OS=Homo sapiens GN=LMNA PE=2 SV=1	0.407079	0.770823	1.38458	0.739552	1.29397	0.85239	0.854162	0.961969	-0.107807
Q5TCJ4	Q5TCJ4	Lamin A/C OS=Homo sapiens GN=LMNA PE=2 SV=1	0.236712	0.621515	1.3626	0.720708	1.32126	0.495945	0.740275	0.84597	-0.105696
Q5TCU3	Q5TCU3	Tropomyosin 2 (Beta) OS=Homo sapiens GN=TPM2 PE=2 SV=1	0.339973	0.4475	-0.0192589	1.17018	1.26574	0.894012	0.256071	1.10998	-0.853906
Q5TCU6	Q5TCU6	Talin 1 OS=Homo sapiens GN=TLN1 PE=2 SV=1	1.03915	0.401926	0.504651	0.327937	0.27842	0.233686	0.648576	0.280014	0.368561
Q5TCU8	Q5TCU8	Tropomyosin 2 (Beta) OS=Homo sapiens GN=TPM2 PE=2 SV=1	0.0914343	0.089596	-0.207181	0.716737	1.11629	0.493718	-0.00871691	0.775581	-0.784298
[truncated: 247 more rows]

## Sheet: differentially expressed (251)
ID	NAME	Annotation	p-value	T1ToSTD	T2ToSTD	T3ToSTD	U1ToSTD	U2ToSTD	U3ToSTD
sp|P10620	MGST1	Microsomal glutathione S-transferase 1 OS=Homo sapiens GN=MGST1 PE=1 SV=1	0.000295856	0.886852	0.706458	0.588114	-0.75178	-1.07828	-0.783009
tr|F5H6X2	F5H6X2	Uncharacterized protein OS=Homo sapiens GN=MGST1 PE=4 SV=1	0.000295856	0.886852	0.706458	0.588114	-0.75178	-1.07828	-0.783009
tr|F5H7F6	F5H7F6	Uncharacterized protein OS=Homo sapiens GN=MGST1 PE=4 SV=1	0.000295856	0.886852	0.706458	0.588114	-0.75178	-1.07828	-0.783009
sp|Q58FF7	H90B3	Putative heat shock protein HSP 90-beta-3 OS=Homo sapiens GN=HSP90AB3P PE=5 SV=1	0.000536673	0.619461	0.60019	0.527491	-0.0207921	-0.222576	-0.0621296
tr|F8VZU9	F8VZU9	Uncharacterized protein OS=Homo sapiens GN=MYL6 PE=4 SV=1	0.000733314	-0.169165	-0.279613	0.027584	0.718021	0.687978	0.764356
tr|F8W180	F8W180	Uncharacterized protein OS=Homo sapiens GN=MYL6 PE=4 SV=1	0.000733314	-0.169165	-0.279613	0.027584	0.718021	0.687978	0.764356
tr|F5H4S7	F5H4S7	Uncharacterized protein OS=Homo sapiens GN=SUCLG2 PE=4 SV=1	0.00103138	1.21829	0.956195	0.984029	0.311636	0.136369	0.162474
sp|P51911	CNN1	Calponin-1 OS=Homo sapiens GN=CNN1 PE=1 SV=2	0.00117644	0.059649	-0.284191	-0.358117	1.18979	1.05115	0.915923
tr|B4DUX6	B4DUX6	Uncharacterized protein OS=Homo sapiens GN=CNN1 PE=2 SV=1	0.00117644	0.059649	-0.284191	-0.358117	1.18979	1.05115	0.915923
tr|B7Z7E1	B7Z7E1	Uncharacterized protein OS=Homo sapiens GN=CNN1 PE=2 SV=1	0.00117644	0.059649	-0.284191	-0.358117	1.18979	1.05115	0.915923
tr|B4DP96	B4DP96	Uncharacterized protein OS=Homo sapiens GN=ANPEP PE=2 SV=1	0.00118698	1.12829	1.07919	1.078	1.65024	1.54213	1.46726
sp|P30050	RL12	60S ribosomal protein L12 OS=Homo sapiens GN=RPL12 PE=1 SV=1	0.00120213	0.925633	0.638983	0.828845	-0.0623822	-0.367212	-0.184834
sp|P21695	GPDA	Glycerol-3-phosphate dehydrogenase [NAD+], cytoplasmic OS=Homo sapiens GN=GPD1 PE=1 SV=4	0.00145036	1.28305	0.591129	0.844425	-1.24743	-1.7335	-2.17779
tr|F8VVR9	F8VVR9	Uncharacterized protein OS=Homo sapiens GN=GPD1 PE=4 SV=1	0.00145036	1.28305	0.591129	0.844425	-1.24743	-1.7335	-2.17779
tr|F8W1L5	F8W1L5	Uncharacterized protein OS=Homo sapiens GN=GPD1 PE=3 SV=1	0.00145036	1.28305	0.591129	0.844425	-1.24743	-1.7335	-2.17779
sp|P17661	DESM	Desmin OS=Homo sapiens GN=DES PE=1 SV=3	0.00198693	0.731698	0.879002	1.07167	0.0314456	0.194989	0.0329939
tr|F5GYQ8	F5GYQ8	Uncharacterized protein OS=Homo sapiens GN=ACOX1 PE=4 SV=1	0.00416516	1.28659	2.15516	1.55816	0.237993	-0.139137	-0.121165
tr|C9JVY5	C9JVY5	Uncharacterized protein OS=Homo sapiens GN=AKAP2 PE=4 SV=1	0.00443285	0.0324749	0.118445	0.0563168	0.344968	0.454765	0.304557
sp|P42330	AK1C3	Aldo-keto reductase family 1 member C3 OS=Homo sapiens GN=AKR1C3 PE=1 SV=4	0.00457013	1.44617	1.22367	1.22106	0.418438	0.233963	-0.207758
sp|Q9Y2Q3	GSTK1	Glutathione S-transferase kappa 1 OS=Homo sapiens GN=GSTK1 PE=1 SV=3	0.00499079	0.556532	0.806785	0.897684	-0.81241	-1.05332	-0.245587
tr|E9PFN5	E9PFN5	Uncharacterized protein OS=Homo sapiens GN=GSTK1 PE=4 SV=1	0.00499079	0.556532	0.806785	0.897684	-0.81241	-1.05332	-0.245587
tr|E9PGL6	E9PGL6	Uncharacterized protein OS=Homo sapiens GN=EFEMP1 PE=4 SV=2	0.00522743	0.434902	0.472644	0.570459	0.922867	0.813073	0.765366
tr|B4DKR9	B4DKR9	Uncharacterized protein OS=Homo sapiens GN=AKR1C2 PE=2 SV=1	0.00536928	1.90991	1.61665	1.66051	0.822292	0.415556	0.0710328
sp|P61019	RAB2A	Ras-related protein Rab-2A OS=Homo sapiens GN=RAB2A PE=1 SV=1	0.00540357	0.477516	0.411793	0.500874	-0.457691	-0.571848	-0.0771282
tr|B4DMQ5	B4DMQ5	Uncharacterized protein OS=Homo sapiens GN=RAB2A PE=2 SV=1	0.00540357	0.477516	0.411793	0.500874	-0.457691	-0.571848	-0.0771282
tr|F5H399	F5H399	Uncharacterized protein OS=Homo sapiens GN=RAB2A PE=3 SV=1	0.00540357	0.477516	0.411793	0.500874	-0.457691	-0.571848	-0.0771282
sp|P49327	FAS	Fatty acid synthase OS=Homo sapiens GN=FASN PE=1 SV=3	0.00542339	1.45609	0.869506	0.513548	-2.08422	-0.954155	-1.26384
sp|Q12805	FBLN3	EGF-containing fibulin-like extracellular matrix protein 1 OS=Homo sapiens GN=EFEMP1 PE=1 SV=2	0.00592989	0.434902	0.472644	0.621817	0.922867	0.813073	0.968409
tr|B4DW75	B4DW75	Uncharacterized protein OS=Homo sapiens GN=EFEMP1 PE=2 SV=1	0.00592989	0.434902	0.472644	0.621817	0.922867	0.813073	0.968409
sp|Q9Y646	PGCP	Plasma glutamate carboxypeptidase OS=Homo sapiens GN=PGCP PE=1 SV=1	0.00602741	-0.285716	-0.171074	0.0139139	0.665183	1.25551	0.802423
tr|B5MDX4	B5MDX4	Uncharacterized protein OS=Homo sapiens PE=4 SV=1	0.00602741	-0.285716	-0.171074	0.0139139	0.665183	1.25551	0.802423
sp|P07951	2|TPM2	Isoform 2 of Tropomyosin beta chain OS=Homo sapiens GN=TPM2	0.00613302	0.339973	0.373725	-0.0677846	1.1767	1.26844	0.938802
tr|E7EWH4	E7EWH4	Uncharacterized protein OS=Homo sapiens GN=AK2 PE=3 SV=1	0.00637252	0.486169	0.548078	1.03415	-0.919626	-0.679837	-0.290777
tr|F8VZG5	F8VZG5	Uncharacterized protein OS=Homo sapiens GN=AK2 PE=3 SV=1	0.00637252	0.486169	0.548078	1.03415	-0.919626	-0.679837	-0.290777
sp|P28074	PSB5	Proteasome subunit beta type-5 OS=Homo sapiens GN=PSMB5 PE=1 SV=3	0.00683604	-0.0035209	-0.407266	-0.272883	0.651854	0.835778	0.422302
tr|E9PAV2	E9PAV2	Uncharacterized protein OS=Homo sapiens GN=PSMB5 PE=3 SV=1	0.00683604	-0.0035209	-0.407266	-0.272883	0.651854	0.835778	0.422302
sp|P07996	TSP1	Thrombospondin-1 OS=Homo sapiens GN=THBS1 PE=1 SV=2	0.00726118	2.17829	1.84346	2.08061	3.27849	2.70885	3.02788
sp|Q9Y230	RUVB2	RuvB-like 2 OS=Homo sapiens GN=RUVBL2 PE=1 SV=3	0.0072796	0.679997	0.874153	0.611922	0.057955	0.248959	-0.110812
sp|P15880	RS2	40S ribosomal protein S2 OS=Homo sapiens GN=RPS2 PE=1 SV=2	0.00742368	0.872618	0.791506	1.01567	-0.260109	0.294822	-0.222984
tr|E9PQD7	E9PQD7	Uncharacterized protein OS=Homo sapiens GN=RPS2 PE=4 SV=1	0.00742368	0.872618	0.791506	1.01567	-0.260109	0.294822	-0.222984
tr|F8WD26	F8WD26	Uncharacterized protein OS=Homo sapiens GN=LMO7 PE=4 SV=1	0.00775493	-0.0728365	-0.22984	0.00596134	0.735631	1.58755	1.4689
sp|P05388	RLA0	60S acidic ribosomal protein P0 OS=Homo sapiens GN=RPLP0 PE=1 SV=1	0.00786306	0.458226	0.392349	0.424761	-0.591924	-0.536551	-0.0685021
sp|Q8NHW5	RLA0L	60S acidic ribosomal protein P0-like OS=Homo sapiens GN=RPLP0P6 PE=5 SV=1	0.00786306	0.458226	0.392349	0.424761	-0.591924	-0.536551	-0.0685021
tr|F8VQY6	F8VQY6	Uncharacterized protein OS=Homo sapiens GN=RPLP0 PE=3 SV=1	0.00786306	0.458226	0.392349	0.424761	-0.591924	-0.536551	-0.0685021
tr|F8VRK7	F8VRK7	Uncharacterized protein OS=Homo sapiens GN=RPLP0 PE=3 SV=1	0.00786306	0.458226	0.392349	0.424761	-0.591924	-0.536551	-0.0685021
tr|F8VU65	F8VU65	Uncharacterized protein OS=Homo sapiens GN=RPLP0 PE=3 SV=1	0.00786306	0.458226	0.392349	0.424761	-0.591924	-0.536551	-0.0685021
tr|F8VWS0	F8VWS0	Uncharacterized protein OS=Homo sapiens GN=RPLP0 PE=3 SV=1	0.00786306	0.458226	0.392349	0.424761	-0.591924	-0.536551	-0.0685021
tr|Q3B7A4	Q3B7A4	RPLP0 protein OS=Homo sapiens GN=RPLP0 PE=2 SV=1	0.00786306	0.458226	0.392349	0.424761	-0.591924	-0.536551	-0.0685021
sp|P28838	AMPL	Cytosol aminopeptidase OS=Homo sapiens GN=LAP3 PE=1 SV=3	0.00873658	0.877572	1.17147	0.402529	-0.325126	-0.299163	-0.192757
tr|Q5TCU3	Q5TCU3	Tropomyosin 2 (Beta) OS=Homo sapiens GN=TPM2 PE=2 SV=1	0.00898029	0.339973	0.4475	-0.0192589	1.17018	1.26574	0.894012
sp|Q8WWI1	3|LMO7	Isoform 3 of LIM domain only protein 7 OS=Homo sapiens GN=LMO7	0.00920913	0.00901609	-0.22984	0.236335	0.817484	1.58755	1.36188
tr|E9PMS6	E9PMS6	Uncharacterized protein OS=Homo sapiens GN=LMO7 PE=4 SV=1	0.00920913	0.00901609	-0.22984	0.236335	0.817484	1.58755	1.36188
sp|P62873	GBB1	Guanine nucleotide-binding protein G(I)/G(S)/G(T) subunit beta-1 OS=Homo sapiens GN=GNB1 PE=1 SV=3	0.00937151	0.183985	0.223873	0.566809	0.842133	1.00177	0.979058
sp|P14866	HNRPL	Heterogeneous nuclear ribonucleoprotein L OS=Homo sapiens GN=HNRNPL PE=1 SV=2	0.00961434	0.703882	0.527149	0.384182	-0.38274	-0.0439066	-0.0276557
tr|A6NIT8	A6NIT8	Uncharacterized protein OS=Homo sapiens GN=HNRNPL PE=2 SV=1	0.00961434	0.703882	0.527149	0.384182	-0.38274	-0.0439066	-0.0276557
tr|E7ETR0	E7ETR0	Uncharacterized protein OS=Homo sapiens GN=RUVBL1 PE=4 SV=1	0.0101645	0.669244	0.507011	0.785943	0.21298	-0.195919	-0.0297773
tr|B5ME26	B5ME26	Uncharacterized protein OS=Homo sapiens GN=AKR1C2 PE=4 SV=1	0.0104395	1.56102	0.860173	1.09505	0.0771316	0.12804	-0.443312
tr|E9PKH2	E9PKH2	Uncharacterized protein OS=Homo sapiens GN=SERPINH1 PE=3 SV=1	0.0111529	0.680933	0.507336	0.518584	0.134003	0.239034	0.312397
sp|P42765	THIM	3-ketoacyl-CoA thiolase, mitochondrial OS=Homo sapiens GN=ACAA2 PE=1 SV=2	0.0112276	0.879964	0.766226	0.991404	0.281711	-0.200522	0.268049
sp|P13667	PDIA4	Protein disulfide-isomerase A4 OS=Homo sapiens GN=PDIA4 PE=1 SV=2	0.011387	0.471678	0.395833	0.543403	0.750406	0.796869	0.655558
tr|E9PLH4	E9PLH4	Uncharacterized protein OS=Homo sapiens GN=LMO7 PE=4 SV=1	0.0118061	-0.0728365	-0.22984	0.209114	0.735631	1.58755	1.45451
tr|E9PMT2	E9PMT2	Uncharacterized protein OS=Homo sapiens GN=LMO7 PE=4 SV=1	0.0118061	-0.0728365	-0.22984	0.209114	0.735631	1.58755	1.45451
sp|P00325	ADH1B	Alcohol dehydrogenase 1B OS=Homo sapiens GN=ADH1B PE=1 SV=2	0.0118771	0.904748	-0.215596	0.335063	-1.20696	-0.964903	-1.16561
tr|F5HB16	F5HB16	Uncharacterized protein OS=Homo sapiens GN=ADH1B PE=2 SV=1	0.0118771	0.904748	-0.215596	0.335063	-1.20696	-0.964903	-1.16561
tr|E9PKI4	E9PKI4	Uncharacterized protein OS=Homo sapiens GN=TXNRD1 PE=4 SV=1	0.0123344	0.585323	0.106539	0.7512	1.59261	1.23105	1.49799
tr|E9PLT3	E9PLT3	Uncharacterized protein OS=Homo sapiens GN=TXNRD1 PE=4 SV=1	0.0123344	0.585323	0.106539	0.7512	1.59261	1.23105	1.49799
sp|P12109	CO6A1	Collagen alpha-1(VI) chain OS=Homo sapiens GN=COL6A1 PE=1 SV=3	0.0123744	0.511712	0.53532	0.843017	-0.161836	0.115459	0.110481
tr|F5GYP4	F5GYP4	Uncharacterized protein OS=Homo sapiens GN=ACADVL PE=4 SV=1	0.0127797	0.467275	0.901642	1.03469	-0.108841	-0.6747	-0.101512
sp|P09493	3|TPM1	Isoform 3 of Tropomyosin alpha-1 chain OS=Homo sapiens GN=TPM1	0.0129792	0.151808	0.0383203	-0.194383	0.672318	1.05624	0.569236
sp|Q92928	RAB1C	Putative Ras-related protein Rab-1C OS=Homo sapiens GN=RAB1C PE=5 SV=2	0.0130124	0.729157	0.8424	0.816332	0.352824	0.253947	0.557332
sp|Q9H0U4	RAB1B	Ras-related protein Rab-1B OS=Homo sapiens GN=RAB1B PE=1 SV=1	0.0130124	0.729157	0.8424	0.816332	0.352824	0.253947	0.557332
sp|P62753	RS6	40S ribosomal protein S6 OS=Homo sapiens GN=RPS6 PE=1 SV=1	0.0130651	0.427973	0.826879	0.575979	-0.50775	-0.24035	0.047476
tr|A2A3R5	A2A3R5	40S ribosomal protein S6 OS=Homo sapiens GN=RPS6 PE=3 SV=1	0.0130651	0.427973	0.826879	0.575979	-0.50775	-0.24035	0.047476
sp|P13804	ETFA	Electron transfer flavoprotein subunit alpha, mitochondrial OS=Homo sapiens GN=ETFA PE=1 SV=1	0.0137489	0.611899	0.688411	0.872667	0.283971	-0.173276	-0.249563
sp|P52565	GDIR1	Rho GDP-dissociation inhibitor 1 OS=Homo sapiens GN=ARHGDIA PE=1 SV=3	0.013909	0.975499	0.677684	0.347479	-0.130321	-0.388027	-0.0673198
sp|P55010	IF5	Eukaryotic translation initiation factor 5 OS=Homo sapiens GN=EIF5 PE=1 SV=2	0.0157007	1.04947	0.519543	0.596228	-0.19342	0.138956	-0.219485
sp|Q15067	ACOX1	Peroxisomal acyl-coenzyme A oxidase 1 OS=Homo sapiens GN=ACOX1 PE=1 SV=3	0.0158584	0.908623	1.71065	1.57969	0.395888	0.0552212	0.426103
tr|Q6ZN40	Q6ZN40	Tropomyosin 1 (Alpha), isoform CRA_f OS=Homo sapiens GN=TPM1 PE=2 SV=1	0.016023	0.151808	0.11945	-0.194383	0.67778	0.842965	0.453767
tr|F5GY62	F5GY62	Uncharacterized protein OS=Homo sapiens GN=LIMCH1 PE=4 SV=1	0.0167206	-0.0549724	-0.0966926	-0.263283	0.464977	0.75816	0.254125
sp|Q96I99	SUCB2	Succinyl-CoA ligase [GDP-forming] subunit beta, mitochondrial OS=Homo sapiens GN=SUCLG2 PE=1 SV=2	0.016852	1.687	1.15239	1.41049	0.779338	0.30066	0.666259
tr|E7ET08	E7ET08	Uncharacterized protein OS=Homo sapiens GN=HSPA8 PE=3 SV=1	0.0169194	1.67171	1.41104	1.47331	1.79791	1.86236	1.93172
tr|F5GYT4	F5GYT4	Uncharacterized protein OS=Homo sapiens GN=ACTB PE=3 SV=1	0.0169466	3.06037	3.0345	3.41848	3.65816	3.82905	3.64764
sp|P15090	FABP4	Fatty acid-binding protein, adipocyte OS=Homo sapiens GN=FABP4 PE=1 SV=3	0.0169591	2.38754	1.47543	1.99084	0.524807	-0.203986	0.804275
sp|Q16270	IBP7	Insulin-like growth factor-binding protein 7 OS=Homo sapiens GN=IGFBP7 PE=1 SV=1	0.0171282	-0.0327589	-0.0547502	-0.196741	1.11873	1.69646	0.618972
tr|B4E1N2	B4E1N2	Uncharacterized protein OS=Homo sapiens GN=IGFBP7 PE=2 SV=1	0.0171282	-0.0327589	-0.0547502	-0.196741	1.11873	1.69646	0.618972
tr|E9PIZ5	E9PIZ5	Uncharacterized protein OS=Homo sapiens GN=TXNRD1 PE=4 SV=1	0.0176389	0.550721	0.113488	0.744251	1.66473	1.16064	1.35562
sp|O14950	ML12B	Myosin regulatory light chain 12B OS=Homo sapiens GN=MYL12B PE=1 SV=2	0.0178219	0.720012	0.516259	0.662257	1.49838	1.1009	1.06452
sp|P19105	ML12A	Myosin regulatory light chain 12A OS=Homo sapiens GN=MYL12A PE=1 SV=2	0.0178219	0.720012	0.516259	0.662257	1.49838	1.1009	1.06452
sp|Q9Y2D5	6|AKAP2	Isoform 4 of A-kinase anchor protein 2 OS=Homo sapiens GN=AKAP2	0.0178942	0.0282663	0.103814	0.0956832	0.27123	0.469533	0.283441
tr|E5RH35	E5RH35	Uncharacterized protein OS=Homo sapiens PE=4 SV=1	0.0189513	-0.285716	-0.440888	0.0826109	0.665183	1.50334	0.733726
tr|E5RJA8	E5RJA8	Uncharacterized protein OS=Homo sapiens PE=4 SV=1	0.0189513	-0.285716	-0.440888	0.0826109	0.665183	1.50334	0.733726
tr|E5RJP8	E5RJP8	Uncharacterized protein OS=Homo sapiens PE=4 SV=1	0.0189513	-0.285716	-0.440888	0.0826109	0.665183	1.50334	0.733726
tr|E5RJZ7	E5RJZ7	Uncharacterized protein OS=Homo sapiens PE=4 SV=1	0.0189513	-0.285716	-0.440888	0.0826109	0.665183	1.50334	0.733726
sp|Q92804	2|RBP56	Isoform Short of TATA-binding protein-associated factor 2N OS=Homo sapiens GN=TAF15	0.0192388	0.371428	0.333586	0.145237	0.572762	0.521487	0.635173
tr|F5GWQ7	F5GWQ7	Uncharacterized protein OS=Homo sapiens GN=TAF15 PE=4 SV=1	0.0192388	0.371428	0.333586	0.145237	0.572762	0.521487	0.635173
tr|Q5TCU8	Q5TCU8	Tropomyosin 2 (Beta) OS=Homo sapiens GN=TPM2 PE=2 SV=1	0.0194076	0.0914343	0.089596	-0.207181	0.716737	1.11629	0.493718
tr|E9PMP7	E9PMP7	Uncharacterized protein OS=Homo sapiens GN=LMO7 PE=4 SV=1	0.0194456	0.0746942	-0.22984	0.466709	0.834589	1.58755	1.25486
sp|P49368	TCPG	T-complex protein 1 subunit gamma OS=Homo sapiens GN=CCT3 PE=1 SV=4	0.0197464	0.897301	0.53198	0.547453	-0.296112	0.219834	-0.124978
tr|A6NE14	A6NE14	Uncharacterized protein OS=Homo sapiens GN=CCT3 PE=2 SV=1	0.0197464	0.897301	0.53198	0.547453	-0.296112	0.219834	-0.124978
tr|B4DUR8	B4DUR8	Uncharacterized protein OS=Homo sapiens GN=CCT3 PE=2 SV=1	0.0197464	0.897301	0.53198	0.547453	-0.296112	0.219834	-0.124978
tr|E9PAQ6	E9PAQ6	Uncharacterized protein OS=Homo sapiens GN=CCT3 PE=3 SV=1	0.0197464	0.897301	0.53198	0.547453	-0.296112	0.219834	-0.124978
sp|P62820	RAB1A	Ras-related protein Rab-1A OS=Homo sapiens GN=RAB1A PE=1 SV=3	0.0198188	0.728021	0.834736	0.816332	0.35396	0.178106	0.557332
sp|P49411	EFTU	Elongation factor Tu, mitochondrial OS=Homo sapiens GN=TUFM PE=1 SV=2	0.0202137	0.995708	0.917592	1.49823	-0.416919	-0.595347	0.407494
sp|P17516	AK1C4	Aldo-keto reductase family 1 member C4 OS=Homo sapiens GN=AKR1C4 PE=1 SV=3	0.0203377	1.44993	0.65837	0.593221	-0.0471347	-0.586133	-0.979255
tr|A6NHU4	A6NHU4	Uncharacterized protein OS=Homo sapiens GN=AKR1C1 PE=4 SV=1	0.0203377	1.44993	0.65837	0.593221	-0.0471347	-0.586133	-0.979255
tr|E9PBP5	E9PBP5	Uncharacterized protein OS=Homo sapiens GN=AKR1C4 PE=4 SV=1	0.0203377	1.44993	0.65837	0.593221	-0.0471347	-0.586133	-0.979255
sp|P60953	CDC42	Cell division control protein 42 homolog OS=Homo sapiens GN=CDC42 PE=1 SV=2	0.0204065	0.765102	0.946834	0.874481	0.250339	0.516114	-0.0263266
sp|P04843	RPN1	Dolichyl-diphosphooligosaccharide--protein glycosyltransferase subunit 1 OS=Homo sapiens GN=RPN1 PE=1 SV=1	0.0207484	0.55822	0.326102	0.920258	-0.514858	-0.672701	0.00738462
tr|B7Z4L4	B7Z4L4	Uncharacterized protein OS=Homo sapiens GN=RPN1 PE=2 SV=1	0.0207484	0.55822	0.326102	0.920258	-0.514858	-0.672701	0.00738462
tr|F5H6I5	F5H6I5	Uncharacterized protein OS=Homo sapiens GN=RPN1 PE=4 SV=1	0.0207484	0.55822	0.326102	0.920258	-0.514858	-0.672701	0.00738462
tr|E7EXB4	E7EXB4	Uncharacterized protein OS=Homo sapiens GN=HSPD1 PE=3 SV=1	0.0208812	1.64092	1.45403	1.91115	0.958991	0.265817	0.90569
tr|B3KTZ0	B3KTZ0	Guanine nucleotide binding protein (G protein), alpha inhibiting activity polypeptide 2, isoform CRA_e OS=Homo sapiens GN=GNAI2 PE=2 SV=1	0.0210261	-0.0619874	-0.268349	0.266992	0.465132	0.831863	0.787837
tr|B4DYA0	B4DYA0	Guanine nucleotide binding protein (G protein), alpha inhibiting activity polypeptide 2, isoform CRA_f OS=Homo sapiens GN=GNAI2 PE=2 SV=1	0.0210261	-0.0619874	-0.268349	0.266992	0.465132	0.831863	0.787837
tr|B4E2X5	B4E2X5	Guanine nucleotide binding protein (G protein), alpha inhibiting activity polypeptide 2, isoform CRA_c OS=Homo sapiens GN=GNAI2 PE=2 SV=1	0.0210261	-0.0619874	-0.268349	0.266992	0.465132	0.831863	0.787837
tr|F5GZL8	F5GZL8	Uncharacterized protein OS=Homo sapiens GN=GNAI2 PE=4 SV=1	0.0210261	-0.0619874	-0.268349	0.266992	0.465132	0.831863	0.787837
tr|Q8N322	Q8N322	Arylsulfatase B OS=Homo sapiens GN=ARSB PE=2 SV=1	0.0211296	-0.360418	-0.111596	-0.262073	0.626428	0.985236	0.221173
sp|P35579	MYH9	Myosin-9 OS=Homo sapiens GN=MYH9 PE=1 SV=4	0.0216857	1.5262	1.5081	1.34871	1.89451	1.69985	1.71348
sp|P20742	PZP	Pregnancy zone protein OS=Homo sapiens GN=PZP PE=1 SV=4	0.0217522	0.33364	0.723313	0.723236	0.00987635	0.0500214	-0.398856
sp|Q15149	2|PLEC	Isoform 2 of Plectin OS=Homo sapiens GN=PLEC	0.0218977	0.655607	0.916223	0.97482	0.0154735	0.405112	0.380621
sp|Q7Z3B1	NEGR1	Neuronal growth regulator 1 OS=Homo sapiens GN=NEGR1 PE=1 SV=3	0.0222203	-0.166543	-0.0386618	0.247586	0.397164	0.642771	0.745286
tr|Q8N440	Q8N440	NEGR1 protein OS=Homo sapiens GN=NEGR1 PE=2 SV=1	0.0222203	-0.166543	-0.0386618	0.247586	0.397164	0.642771	0.745286
sp|P02511	CRYAB	Alpha-crystallin B chain OS=Homo sapiens GN=CRYAB PE=1 SV=2	0.0222744	1.73073	0.703102	0.580409	-0.570487	-0.284107	-0.248479
tr|E9PR44	E9PR44	Uncharacterized protein OS=Homo sapiens GN=CRYAB PE=3 SV=1	0.0222744	1.73073	0.703102	0.580409	-0.570487	-0.284107	-0.248479
sp|P61026	RAB10	Ras-related protein Rab-10 OS=Homo sapiens GN=RAB10 PE=1 SV=1	0.0224106	0.502986	0.367739	0.545583	0.0467269	0.254549	-0.0714577
tr|C9IZA2	C9IZA2	Uncharacterized protein OS=Homo sapiens GN=TPM1 PE=2 SV=2	0.0226447	0.186001	0.0578187	-0.200782	0.670497	1.05624	0.493718
tr|E9PI65	E9PI65	Uncharacterized protein OS=Homo sapiens GN=HSPA8 PE=3 SV=1	0.0226881	1.64855	1.39875	1.56097	1.76206	1.93985	1.87724
sp|P84095	RHOG	Rho-related GTP-binding protein RhoG OS=Homo sapiens GN=RHOG PE=1 SV=1	0.0227679	0.69654	1.0339	0.962992	0.236919	0.502924	-0.0212561
tr|B3KWS3	B3KWS3	Uncharacterized protein OS=Homo sapiens GN=PLOD2 PE=2 SV=1	0.0235792	0.240434	0.351315	0.164713	0.531292	0.771402	0.513658
sp|Q9H425	CA198	Uncharacterized protein C1orf198 OS=Homo sapiens GN=C1orf198 PE=1 SV=1	0.0239599	0.0515808	-0.339811	0.00391692	0.63026	0.272893	0.588471
tr|A8K8R8	A8K8R8	Uncharacterized protein OS=Homo sapiens GN=C1orf198 PE=2 SV=1	0.0239599	0.0515808	-0.339811	0.00391692	0.63026	0.272893	0.588471
sp|P49748	ACADV	Very long-chain specific acyl-CoA dehydrogenase, mitochondrial OS=Homo sapiens GN=ACADVL PE=1 SV=1	0.0239703	0.452492	0.901642	1.21976	0.0384428	-0.6747	-0.101512
tr|F5H2A9	F5H2A9	Uncharacterized protein OS=Homo sapiens GN=ACADVL PE=3 SV=1	0.0239703	0.452492	0.901642	1.21976	0.0384428	-0.6747	-0.101512
sp|P40939	ECHA	Trifunctional enzyme subunit alpha, mitochondrial OS=Homo sapiens GN=HADHA PE=1 SV=2	0.0244252	1.57195	1.58796	2.13454	0.997792	0.806385	1.19905
sp|Q8TF09	DLRB2	Dynein light chain roadblock-type 2 OS=Homo sapiens GN=DYNLRB2 PE=1 SV=1	0.0244649	-0.0557737	-0.386938	-0.00409586	0.274362	0.842856	0.583864
sp|Q9NP97	DLRB1	Dynein light chain roadblock-type 1 OS=Homo sapiens GN=DYNLRB1 PE=1 SV=3	0.0244649	-0.0557737	-0.386938	-0.00409586	0.274362	0.842856	0.583864
tr|B1AKR6	B1AKR6	Dynein, light chain, roadblock-type 1 OS=Homo sapiens GN=DYNLRB1 PE=4 SV=1	0.0244649	-0.0557737	-0.386938	-0.00409586	0.274362	0.842856	0.583864
tr|B4DFR2	B4DFR2	Uncharacterized protein OS=Homo sapiens GN=DYNLRB1 PE=2 SV=1	0.0244649	-0.0557737	-0.386938	-0.00409586	0.274362	0.842856	0.583864
tr|Q9Y427	Q9Y427	Putative uncharacterized protein DKFZp586K2222 OS=Homo sapiens GN=DKFZp586K2222 PE=2 SV=2	0.0245269	0.354597	0.201712	-0.197583	0.663312	0.694768	0.767256
sp|P15848	ARSB	Arylsulfatase B OS=Homo sapiens GN=ARSB PE=1 SV=1	0.0247848	-0.493766	0.021752	-0.268451	0.32505	0.843304	0.402436
tr|B4DE01	B4DE01	Uncharacterized protein OS=Homo sapiens GN=CAPZA2 PE=2 SV=1	0.0249869	0.551083	0.431112	0.731351	1.12919	1.19613	1.79754
tr|B4DT43	B4DT43	Uncharacterized protein OS=Homo sapiens GN=ETFA PE=2 SV=1	0.0253714	0.585023	0.688411	0.856506	0.228013	-0.173276	-0.624605
sp|O00469	2|PLOD2	Isoform 2 of Procollagen-lysine,2-oxoglutarate 5-dioxygenase 2 OS=Homo sapiens GN=PLOD2	0.0256472	0.269442	0.428959	0.233446	0.593841	0.961323	0.684893
tr|E7ETU9	E7ETU9	Uncharacterized protein OS=Homo sapiens GN=PLOD2 PE=4 SV=1	0.0256472	0.269442	0.428959	0.233446	0.593841	0.961323	0.684893
tr|B4DHC4	B4DHC4	Uncharacterized protein OS=Homo sapiens GN=YWHAG PE=2 SV=1	0.0261455	1.36913	1.00667	1.13822	1.62225	1.57434	1.94529
tr|F8WAM2	F8WAM2	Uncharacterized protein OS=Homo sapiens GN=CCT7 PE=3 SV=1	0.0263014	1.18316	0.549911	0.816934	0.336027	-0.0808977	-0.0628835
tr|B4DW52	B4DW52	Uncharacterized protein OS=Homo sapiens GN=ACTB PE=2 SV=1	0.0263324	3.06037	3.02229	3.45247	3.65816	3.9209	3.64764
tr|D6RA40	D6RA40	Uncharacterized protein OS=Homo sapiens GN=MAP1B PE=4 SV=1	0.0266011	1.209	0.596737	0.337852	-0.552228	-0.266917	-0.0647967
sp|P60903	S10AA	Protein S100-A10 OS=Homo sapiens GN=S100A10 PE=1 SV=2	0.0271664	0.832422	1.01036	0.103057	-0.519302	-1.12267	-2.21251
sp|Q14247	SRC8	Src substrate cortactin OS=Homo sapiens GN=CTTN PE=1 SV=2	0.0274333	0.563357	0.472749	0.372692	0.898372	1.06798	0.68961
tr|Q96H99	Q96H99	Cortactin OS=Homo sapiens GN=CTTN PE=2 SV=1	0.0274333	0.563357	0.472749	0.372692	0.898372	1.06798	0.68961
sp|P51659	DHB4	Peroxisomal multifunctional enzyme type 2 OS=Homo sapiens GN=HSD17B4 PE=1 SV=3	0.0280424	0.400632	0.461984	1.15352	-0.6006	-0.0694147	-1.02577
tr|E7ET17	E7ET17	Uncharacterized protein OS=Homo sapiens GN=HSD17B4 PE=4 SV=1	0.0280424	0.400632	0.461984	1.15352	-0.6006	-0.0694147	-1.02577
tr|E7EWE5	E7EWE5	Uncharacterized protein OS=Homo sapiens GN=HSD17B4 PE=3 SV=1	0.0280424	0.400632	0.461984	1.15352	-0.6006	-0.0694147	-1.02577
tr|E9PB82	E9PB82	Uncharacterized protein OS=Homo sapiens GN=HSD17B4 PE=3 SV=1	0.0280424	0.400632	0.461984	1.15352	-0.6006	-0.0694147	-1.02577
tr|F5HE57	F5HE57	Uncharacterized protein OS=Homo sapiens GN=HSD17B4 PE=3 SV=1	0.0280424	0.400632	0.461984	1.15352	-0.6006	-0.0694147	-1.02577
sp|Q9Y265	RUVB1	RuvB-like 1 OS=Homo sapiens GN=RUVBL1 PE=1 SV=1	0.0283174	1.02375	0.994623	0.782875	0.523958	0.0346956	0.485022
tr|E7ESH4	E7ESH4	Uncharacterized protein OS=Homo sapiens GN=HSPD1 PE=3 SV=1	0.0285767	1.45034	1.37719	1.86304	0.912426	0.380601	0.972368
sp|P04899	GNAI2	Guanine nucleotide-binding protein G(i) subunit alpha-2 OS=Homo sapiens GN=GNAI2 PE=1 SV=3	0.029686	-0.0619874	-0.268349	0.266992	0.465132	1.06799	0.726542
tr|F5H4U5	F5H4U5	Uncharacterized protein OS=Homo sapiens GN=GNAI2 PE=4 SV=1	0.029686	-0.0619874	-0.268349	0.266992	0.465132	1.06799	0.726542
sp|P52895	AK1C2	Aldo-keto reductase family 1 member C2 OS=Homo sapiens GN=AKR1C2 PE=1 SV=3	0.0299743	2.20825	1.53818	1.53821	0.811647	0.415556	1.10043
tr|B4DK69	B4DK69	Uncharacterized protein OS=Homo sapiens GN=AKR1C2 PE=2 SV=1	0.0299743	2.20825	1.53818	1.53821	0.811647	0.415556	1.10043
sp|O43854	EDIL3	EGF-like repeat and discoidin I-like domain-containing protein 3 OS=Homo sapiens GN=EDIL3 PE=1 SV=1	0.0302575	-0.0720612	-0.0260082	0.0835429	0.81987	0.41358	0.324179
sp|P11021	GRP78	78 kDa glucose-regulated protein OS=Homo sapiens GN=HSPA5 PE=1 SV=2	0.0306597	0.344547	0.313802	0.63175	0.819573	1.00766	0.734606
tr|E9PJ32	E9PJ32	Uncharacterized protein OS=Homo sapiens GN=TAGLN PE=4 SV=1	0.030941	0.149213	-0.235278	0.181119	1.12535	0.621201	1.71788
sp|P55084	ECHB	Trifunctional enzyme subunit beta, mitochondrial OS=Homo sapiens GN=HADHB PE=1 SV=3	0.0315271	0.689941	2.23845	1.15004	-0.416286	0.0759028	-0.271178
tr|B4E2W0	B4E2W0	Uncharacterized protein OS=Homo sapiens GN=HADHB PE=2 SV=1	0.0315271	0.689941	2.23845	1.15004	-0.416286	0.0759028	-0.271178
tr|B5MD38	B5MD38	Uncharacterized protein OS=Homo sapiens GN=HADHB PE=3 SV=1	0.0315271	0.689941	2.23845	1.15004	-0.416286	0.0759028	-0.271178
tr|F5GZQ3	F5GZQ3	Uncharacterized protein OS=Homo sapiens GN=HADHB PE=3 SV=1	0.0315271	0.689941	2.23845	1.15004	-0.416286	0.0759028	-0.271178
sp|Q9Y3I0	RTCB	tRNA-splicing ligase RtcB homolog OS=Homo sapiens GN=C22orf28 PE=1 SV=1	0.031893	0.373803	0.333546	0.570191	0.175782	0.194881	0.195194
tr|E9PCW3	E9PCW3	Uncharacterized protein OS=Homo sapiens GN=C22orf28 PE=4 SV=1	0.031893	0.373803	0.333546	0.570191	0.175782	0.194881	0.195194
sp|Q16891	IMMT	Mitochondrial inner membrane protein OS=Homo sapiens GN=IMMT PE=1 SV=1	0.0327015	0.108684	0.821467	0.663856	-0.307073	-0.063926	-0.224852
tr|B8ZZQ7	B8ZZQ7	Uncharacterized protein OS=Homo sapiens GN=IMMT PE=4 SV=2	0.0327015	0.108684	0.821467	0.663856	-0.307073	-0.063926	-0.224852
tr|B9A067	B9A067	Uncharacterized protein OS=Homo sapiens GN=IMMT PE=4 SV=2	0.0327015	0.108684	0.821467	0.663856	-0.307073	-0.063926	-0.224852
tr|C9J406	C9J406	Uncharacterized protein OS=Homo sapiens GN=IMMT PE=4 SV=1	0.0327015	0.108684	0.821467	0.663856	-0.307073	-0.063926	-0.224852
tr|F5GZ32	F5GZ32	Uncharacterized protein OS=Homo sapiens GN=IMMT PE=4 SV=1	0.0327015	0.108684	0.821467	0.663856	-0.307073	-0.063926	-0.224852
tr|F8W9I1	F8W9I1	Uncharacterized protein OS=Homo sapiens GN=IMMT PE=4 SV=1	0.0327015	0.108684	0.821467	0.663856	-0.307073	-0.063926	-0.224852
sp|P27635	RL10	60S ribosomal protein L10 OS=Homo sapiens GN=RPL10 PE=1 SV=4	0.033212	0.5119	0.534006	0.886138	-0.535664	-0.297406	0.251349
tr|E9PFG7	E9PFG7	Uncharacterized protein OS=Homo sapiens GN=OGDH PE=4 SV=1	0.0336177	0.38003	0.811056	0.760861	0.239508	0.17184	-0.110341
tr|E9PKD3	E9PKD3	Uncharacterized protein OS=Homo sapiens GN=TXNRD1 PE=4 SV=1	0.0338373	0.862635	0.298612	0.744251	1.2591	1.16064	1.15158
tr|E9PJL7	E9PJL7	Uncharacterized protein OS=Homo sapiens GN=CRYAB PE=3 SV=1	0.0343257	1.73073	0.471408	0.580409	-0.570487	-0.322109	-0.248479
tr|E9PNH7	E9PNH7	Uncharacterized protein OS=Homo sapiens GN=CRYAB PE=3 SV=1	0.0343257	1.73073	0.471408	0.580409	-0.570487	-0.322109	-0.248479
tr|E9PRA8	E9PRA8	Uncharacterized protein OS=Homo sapiens GN=CRYAB PE=4 SV=1	0.0343257	1.73073	0.471408	0.580409	-0.570487	-0.322109	-0.248479
sp|P15153	RAC2	Ras-related C3 botulinum toxin substrate 2 OS=Homo sapiens GN=RAC2 PE=1 SV=1	0.0343381	0.717703	1.04404	0.760796	0.297739	0.502924	-0.0244631
sp|P60763	RAC3	Ras-related C3 botulinum toxin substrate 3 OS=Homo sapiens GN=RAC3 PE=1 SV=1	0.0343381	0.717703	1.04404	0.760796	0.297739	0.502924	-0.0244631
tr|B1AH78	B1AH78	Ras-related C3 botulinum toxin substrate 2 (Rho family, small GTP binding protein Rac2) (Fragment) OS=Homo sapiens GN=RAC2 PE=3 SV=1	0.0343381	0.717703	1.04404	0.760796	0.297739	0.502924	-0.0244631
sp|P24844	MYL9	Myosin regulatory light polypeptide 9 OS=Homo sapiens GN=MYL9 PE=1 SV=4	0.0345001	0.828729	0.685267	0.54354	1.43129	0.958791	1.1746
tr|D9YZV2	D9YZV2	Tropomyosin 1 (Alpha) isoform 5 OS=Homo sapiens GN=TPM1 PE=3 SV=1	0.0345384	0.124844	0.0886346	-0.207181	0.64512	1.19138	0.463252
tr|Q96B60	Q96B60	5'-nucleotidase, ecto (CD73) OS=Homo sapiens GN=NT5E PE=2 SV=1	0.034765	0.245517	0.518637	0.644787	1.21868	0.827983	1.49242
sp|P01023	A2MG	Alpha-2-macroglobulin OS=Homo sapiens GN=A2M PE=1 SV=3	0.0350241	0.249942	1.02259	0.86924	-0.258303	0.0876496	-0.614481
sp|P59190	2|RAB15	Isoform 2 of Ras-related protein Rab-15 OS=Homo sapiens GN=RAB15	0.0351888	0.502986	0.367739	0.443743	0.0467269	0.254549	-0.15422
sp|P61006	RAB8A	Ras-related protein Rab-8A OS=Homo sapiens GN=RAB8A PE=1 SV=1	0.0351888	0.502986	0.367739	0.443743	0.0467269	0.254549	-0.15422
sp|Q15286	RAB35	Ras-related protein Rab-35 OS=Homo sapiens GN=RAB35 PE=1 SV=1	0.0351888	0.502986	0.367739	0.443743	0.0467269	0.254549	-0.15422
sp|Q92930	RAB8B	Ras-related protein Rab-8B OS=Homo sapiens GN=RAB8B PE=1 SV=2	0.0351888	0.502986	0.367739	0.443743	0.0467269	0.254549	-0.15422
tr|B4DTA6	B4DTA6	Uncharacterized protein OS=Homo sapiens GN=RAB35 PE=2 SV=1	0.0351888	0.502986	0.367739	0.443743	0.0467269	0.254549	-0.15422
tr|B4E390	B4E390	RAB35, member RAS oncogene family, isoform CRA_b OS=Homo sapiens GN=RAB35 PE=2 SV=1	0.0351888	0.502986	0.367739	0.443743	0.0467269	0.254549	-0.15422
tr|E7EWA5	E7EWA5	Uncharacterized protein OS=Homo sapiens GN=RAB1B PE=4 SV=1	0.0351888	0.502986	0.367739	0.443743	0.0467269	0.254549	-0.15422
tr|F5GY21	F5GY21	Uncharacterized protein OS=Homo sapiens GN=RAB8B PE=3 SV=1	0.0351888	0.502986	0.367739	0.443743	0.0467269	0.254549	-0.15422
tr|F5H157	F5H157	Uncharacterized protein OS=Homo sapiens GN=RAB35 PE=3 SV=1	0.0351888	0.502986	0.367739	0.443743	0.0467269	0.254549	-0.15422
sp|Q04828	AK1C1	Aldo-keto reductase family 1 member C1 OS=Homo sapiens GN=AKR1C1 PE=1 SV=1	0.0373139	2.20825	1.57742	1.47119	0.789924	0.37676	1.14553
sp|Q13228	SBP1	Selenium-binding protein 1 OS=Homo sapiens GN=SELENBP1 PE=1 SV=2	0.0393735	0.919934	0.384379	0.558428	-0.335011	0.254422	-0.333553
tr|B4E1F3	B4E1F3	Uncharacterized protein OS=Homo sapiens GN=SELENBP1 PE=2 SV=1	0.0393735	0.919934	0.384379	0.558428	-0.335011	0.254422	-0.333553
tr|F5GYZ5	F5GYZ5	Uncharacterized protein OS=Homo sapiens GN=SOD2 PE=3 SV=1	0.0395815	0.497401	0.710343	0.788128	0.469867	0.246269	0.243496
tr|F5H3C5	F5H3C5	Uncharacterized protein OS=Homo sapiens GN=SOD2 PE=3 SV=1	0.0395815	0.497401	0.710343	0.788128	0.469867	0.246269	0.243496
tr|F5H4R2	F5H4R2	Uncharacterized protein OS=Homo sapiens GN=SOD2 PE=3 SV=1	0.0395815	0.497401	0.710343	0.788128	0.469867	0.246269	0.243496
sp|Q9NZM1	MYOF	Myoferlin OS=Homo sapiens GN=MYOF PE=1 SV=1	0.0413548	0.145967	0.901734	0.692089	-0.0888792	-0.0153982	-0.26546
tr|C9JCN0	C9JCN0	Uncharacterized protein OS=Homo sapiens GN=MYOF PE=4 SV=2	0.0413548	0.145967	0.901734	0.692089	-0.0888792	-0.0153982	-0.26546
tr|F8W8J4	F8W8J4	Uncharacterized protein OS=Homo sapiens GN=MYOF PE=4 SV=1	0.0413548	0.145967	0.901734	0.692089	-0.0888792	-0.0153982	-0.26546
sp|Q9UMS6	2|SYNP2	Isoform 2 of Synaptopodin-2 OS=Homo sapiens GN=SYNPO2	0.0416556	-0.0677387	0.157308	0.0111104	0.73791	0.631457	0.228067
tr|C9JJJ0	C9JJJ0	Uncharacterized protein OS=Homo sapiens GN=SYNPO2 PE=4 SV=1	0.0416556	-0.0677387	0.157308	0.0111104	0.73791	0.631457	0.228067
tr|E9PEM2	E9PEM2	Uncharacterized protein OS=Homo sapiens GN=SYNPO2 PE=4 SV=1	0.0416556	-0.0677387	0.157308	0.0111104	0.73791	0.631457	0.228067
tr|B7Z5W8	B7Z5W8	Uncharacterized protein OS=Homo sapiens GN=DLST PE=2 SV=1	0.0425605	0.239277	0.453986	0.734559	0.0757999	0.0712152	-0.00112667
tr|A8MXW0	A8MXW0	Uncharacterized protein OS=Homo sapiens GN=ARHGDIA PE=2 SV=2	0.0426678	0.975499	0.549255	0.150905	-0.169619	-0.378122	-0.0421266
sp|O14558	HSPB6	Heat shock protein beta-6 OS=Homo sapiens GN=HSPB6 PE=1 SV=2	0.0426791	1.18946	0.798054	1.00321	0.144283	0.657168	-0.184793
tr|E9PCI5	E9PCI5	Uncharacterized protein OS=Homo sapiens GN=HSPB6 PE=3 SV=2	0.0426791	1.18946	0.798054	1.00321	0.144283	0.657168	-0.184793
tr|E7ESK7	E7ESK7	Uncharacterized protein OS=Homo sapiens GN=YWHAZ PE=4 SV=1	0.0432679	0.282369	-0.49095	0.120319	0.685076	0.748253	0.583188
sp|O60784	TOM1	Target of Myb protein 1 OS=Homo sapiens GN=TOM1 PE=1 SV=2	0.0432695	-0.795	0.0685163	-1.13627	0.52024	1.2422	0.337959
tr|E7EPD0	E7EPD0	Uncharacterized protein OS=Homo sapiens GN=TOM1 PE=4 SV=1	0.0432695	-0.795	0.0685163	-1.13627	0.52024	1.2422	0.337959
tr|E7EPZ3	E7EPZ3	Uncharacterized protein OS=Homo sapiens GN=TOM1 PE=4 SV=2	0.0432695	-0.795	0.0685163	-1.13627	0.52024	1.2422	0.337959
tr|E9PN89	E9PN89	Uncharacterized protein OS=Homo sapiens GN=HSPA8 PE=3 SV=1	0.0432738	1.76728	1.36001	1.49303	1.82632	1.93985	1.97617
tr|F8W0P7	F8W0P7	Uncharacterized protein OS=Homo sapiens GN=ATP5B PE=3 SV=1	0.0433727	0.193855	0.46314	0.9364	1.08063	1.20939	1.25855
sp|P61981	1433G	14-3-3 protein gamma OS=Homo sapiens GN=YWHAG PE=1 SV=2	0.043394	1.45086	1.00667	1.13831	1.64476	1.57434	1.9935
sp|P30837	AL1B1	Aldehyde dehydrogenase X, mitochondrial OS=Homo sapiens GN=ALDH1B1 PE=1 SV=3	0.0445384	-0.0229537	0.184217	0.598265	0.755302	0.814761	0.78008
tr|F8WA65	F8WA65	Uncharacterized protein OS=Homo sapiens GN=TOM1 PE=4 SV=1	0.0445683	-0.795	0.0685163	-0.448037	0.52024	1.2422	0.321127
sp|P61106	RAB14	Ras-related protein Rab-14 OS=Homo sapiens GN=RAB14 PE=1 SV=4	0.0452244	0.715454	0.895984	1.048	0.501231	-0.116303	0.414502
sp|P35998	PRS7	26S protease regulatory subunit 7 OS=Homo sapiens GN=PSMC2 PE=1 SV=3	0.0455799	0.712356	0.397856	0.173934	0.0811375	-0.46876	-0.250822
tr|F8VPA1	F8VPA1	Uncharacterized protein OS=Homo sapiens GN=CS PE=4 SV=1	0.045839	0.347401	0.646042	0.815353	0.0995263	0.289322	-0.0997058
tr|F8VPF9	F8VPF9	Uncharacterized protein OS=Homo sapiens GN=CS PE=4 SV=1	0.045839	0.347401	0.646042	0.815353	0.0995263	0.289322	-0.0997058
tr|F8VRP1	F8VRP1	Uncharacterized protein OS=Homo sapiens GN=CS PE=4 SV=1	0.045839	0.347401	0.646042	0.815353	0.0995263	0.289322	-0.0997058
tr|F8VTT8	F8VTT8	Uncharacterized protein OS=Homo sapiens GN=CS PE=4 SV=1	0.045839	0.347401	0.646042	0.815353	0.0995263	0.289322	-0.0997058
tr|F8VX07	F8VX07	Uncharacterized protein OS=Homo sapiens GN=CS PE=4 SV=1	0.045839	0.347401	0.646042	0.815353	0.0995263	0.289322	-0.0997058
tr|F8VX68	F8VX68	Uncharacterized protein OS=Homo sapiens GN=CS PE=4 SV=1	0.045839	0.347401	0.646042	0.815353	0.0995263	0.289322	-0.0997058
tr|F8VZK9	F8VZK9	Uncharacterized protein OS=Homo sapiens GN=CS PE=4 SV=1	0.045839	0.347401	0.646042	0.815353	0.0995263	0.289322	-0.0997058
tr|F8W1S4	F8W1S4	Uncharacterized protein OS=Homo sapiens GN=CS PE=4 SV=1	0.045839	0.347401	0.646042	0.815353	0.0995263	0.289322	-0.0997058
tr|F8W4S1	F8W4S1	Uncharacterized protein OS=Homo sapiens GN=CS PE=4 SV=1	0.045839	0.347401	0.646042	0.815353	0.0995263	0.289322	-0.0997058
tr|F8W642	F8W642	Uncharacterized protein OS=Homo sapiens GN=CS PE=4 SV=1	0.045839	0.347401	0.646042	0.815353	0.0995263	0.289322	-0.0997058
sp|P46821	MAP1B	Microtubule-associated protein 1B OS=Homo sapiens GN=MAP1B PE=1 SV=2	0.0468507	0.766855	0.722957	0.905793	0.0359691	0.612108	0.231704
sp|Q96Q06	PLIN4	Perilipin-4 OS=Homo sapiens GN=PLIN4 PE=2 SV=2	0.0471533	1.07209	1.39949	1.36494	-0.864251	0.80556	-0.637174
sp|Q6UXB8	PI16	Peptidase inhibitor 16 OS=Homo sapiens GN=PI16 PE=1 SV=1	0.047374	0.0759378	-0.123667	0.508218	1.45017	1.18047	0.563185
tr|F8VZY9	F8VZY9	Uncharacterized protein OS=Homo sapiens GN=KRT18 PE=3 SV=1	0.0474383	0.276177	0.424522	0.670019	0.148182	-0.386061	-0.0385371
sp|P06756	ITAV	Integrin alpha-V OS=Homo sapiens GN=ITGAV PE=1 SV=2	0.0477268	0.359329	0.293833	0.321715	1.39788	0.979288	2.53441
tr|E7EWZ6	E7EWZ6	Uncharacterized protein OS=Homo sapiens GN=ITGAV PE=3 SV=1	0.0477268	0.359329	0.293833	0.321715	1.39788	0.979288	2.53441
sp|Q08043	ACTN3	Alpha-actinin-3 OS=Homo sapiens GN=ACTN3 PE=1 SV=2	0.0482044	0.226779	0.0904122	-0.32388	0.345234	0.675261	0.607537
sp|P20700	LMNB1	Lamin-B1 OS=Homo sapiens GN=LMNB1 PE=1 SV=2	0.0485628	-0.162635	0.171991	0.582938	0.851522	1.583	0.87385
tr|E9PBF6	E9PBF6	Uncharacterized protein OS=Homo sapiens GN=LMNB1 PE=3 SV=1	0.0485628	-0.162635	0.171991	0.582938	0.851522	1.583	0.87385
tr|F5H119	F5H119	Uncharacterized protein OS=Homo sapiens GN=PDIA3 PE=3 SV=1	0.049369	0.454306	0.805488	1.06853	1.20705	1.39607	1.28308
sp|Q02218	ODO1	2-oxoglutarate dehydrogenase, mitochondrial OS=Homo sapiens GN=OGDH PE=1 SV=3	0.0498926	0.374923	0.811056	0.826269	0.136384	0.17184	0.351454
tr|E9PBM1	E9PBM1	Uncharacterized protein OS=Homo sapiens GN=OGDH PE=4 SV=1	0.0498926	0.374923	0.811056	0.826269	0.136384	0.17184	0.351454
tr|E9PCR7	E9PCR7	Uncharacterized protein OS=Homo sapiens GN=OGDH PE=4 SV=1	0.0498926	0.374923	0.811056	0.826269	0.136384	0.17184	0.351454
tr|E9PDF2	E9PDF2	Uncharacterized protein OS=Homo sapiens GN=OGDH PE=4 SV=1	0.0498926	0.374923	0.811056	0.826269	0.136384	0.17184	0.351454
tr|F5H801	F5H801	Uncharacterized protein OS=Homo sapiens GN=OGDH PE=4 SV=1	0.0498926	0.374923	0.811056	0.826269	0.136384	0.17184	0.351454
tr|F5H7U0	F5H7U0	6-phosphogluconate dehydrogenase, decarboxylating OS=Homo sapiens GN=PGD PE=3 SV=1	0.0499252	1.55413	0.972057	0.564904	0.395001	0.119276	-0.0344524

## Sheet: known differentially exp (115)
ID	NAME	Annotation	p-value	T1ToSTD	T2ToSTD	T3ToSTD	U1ToSTD	U2ToSTD	U3ToSTD	Tave	Uave	T-U
O60784	TOM1	Target of Myb protein 1 OS=Homo sapiens GN=TOM1 PE=1 SV=2	0.0432695	-0.795	0.0685163	-1.13627	0.52024	1.2422	0.337959	-0.620918	0.700133	-1.32105
P06756	ITAV	Integrin alpha-V OS=Homo sapiens GN=ITGAV PE=1 SV=2	0.0477268	0.359329	0.293833	0.321715	1.39788	0.979288	2.53441	0.324959	1.63719	-1.31223
Q8WWI1	3|LMO7	Isoform 3 of LIM domain only protein 7 OS=Homo sapiens GN=LMO7	0.00920913	0.00901609	-0.22984	0.236335	0.817484	1.58755	1.36188	0.00517047	1.25564	-1.25047
P51911	CNN1	Calponin-1 OS=Homo sapiens GN=CNN1 PE=1 SV=2	0.00117644	0.059649	-0.284191	-0.358117	1.18979	1.05115	0.915923	-0.19422	1.05229	-1.24651
Q16270	IBP7	Insulin-like growth factor-binding protein 7 OS=Homo sapiens GN=IGFBP7 PE=1 SV=1	0.0171282	-0.0327589	-0.0547502	-0.196741	1.11873	1.69646	0.618972	-0.0947502	1.14472	-1.23947
Q9Y646	PGCP	Plasma glutamate carboxypeptidase OS=Homo sapiens GN=PGCP PE=1 SV=1	0.00602741	-0.285716	-0.171074	0.0139139	0.665183	1.25551	0.802423	-0.147625	0.907705	-1.05533
P07996	TSP1	Thrombospondin-1 OS=Homo sapiens GN=THBS1 PE=1 SV=2	0.00726118	2.17829	1.84346	2.08061	3.27849	2.70885	3.02788	2.03412	3.00507	-0.97095
P07951	2|TPM2	Isoform 2 of Tropomyosin beta chain OS=Homo sapiens GN=TPM2	0.00613302	0.339973	0.373725	-0.0677846	1.1767	1.26844	0.938802	0.215305	1.12798	-0.912677
Q6UXB8	PI16	Peptidase inhibitor 16 OS=Homo sapiens GN=PI16 PE=1 SV=1	0.047374	0.0759378	-0.123667	0.508218	1.45017	1.18047	0.563185	0.153496	1.06461	-0.91111
P20700	LMNB1	Lamin-B1 OS=Homo sapiens GN=LMNB1 PE=1 SV=2	0.0485628	-0.162635	0.171991	0.582938	0.851522	1.583	0.87385	0.197431	1.10279	-0.905359
P28074	PSB5	Proteasome subunit beta type-5 OS=Homo sapiens GN=PSMB5 PE=1 SV=3	0.00683604	-0.0035209	-0.407266	-0.272883	0.651854	0.835778	0.422302	-0.22789	0.636645	-0.864535
Q8N322	Q8N322	Arylsulfatase B OS=Homo sapiens GN=ARSB PE=2 SV=1	0.0211296	-0.360418	-0.111596	-0.262073	0.626428	0.985236	0.221173	-0.244696	0.610946	-0.855641
Q5TCU3	Q5TCU3	Tropomyosin 2 (Beta) OS=Homo sapiens GN=TPM2 PE=2 SV=1	0.00898029	0.339973	0.4475	-0.0192589	1.17018	1.26574	0.894012	0.256071	1.10998	-0.853906
Q5TCU8	Q5TCU8	Tropomyosin 2 (Beta) OS=Homo sapiens GN=TPM2 PE=2 SV=1	0.0194076	0.0914343	0.089596	-0.207181	0.716737	1.11629	0.493718	-0.00871691	0.775581	-0.784298
P04899	GNAI2	Guanine nucleotide-binding protein G(i) subunit alpha-2 OS=Homo sapiens GN=GNAI2 PE=1 SV=3	0.029686	-0.0619874	-0.268349	0.266992	0.465132	1.06799	0.726542	-0.0211147	0.753222	-0.774337
P15848	ARSB	Arylsulfatase B OS=Homo sapiens GN=ARSB PE=1 SV=1	0.0247848	-0.493766	0.021752	-0.268451	0.32505	0.843304	0.402436	-0.246822	0.523597	-0.770418
P09493	3|TPM1	Isoform 3 of Tropomyosin alpha-1 chain OS=Homo sapiens GN=TPM1	0.0129792	0.151808	0.0383203	-0.194383	0.672318	1.05624	0.569236	-0.00141834	0.76593	-0.767349
D9YZV2	D9YZV2	Tropomyosin 1 (Alpha) isoform 5 OS=Homo sapiens GN=TPM1 PE=3 SV=1	0.0345384	0.124844	0.0886346	-0.207181	0.64512	1.19138	0.463252	0.00209905	0.766582	-0.764483
B3KTZ0	B3KTZ0	Guanine nucleotide binding protein (G protein), alpha inhibiting activity polypeptide 2, isoform CRA_e OS=Homo sapiens GN=GNAI2 PE=2 SV=1	0.0210261	-0.0619874	-0.268349	0.266992	0.465132	0.831863	0.787837	-0.0211147	0.694944	-0.716058
B4DYA0	B4DYA0	Guanine nucleotide binding protein (G protein), alpha inhibiting activity polypeptide 2, isoform CRA_f OS=Homo sapiens GN=GNAI2 PE=2 SV=1	0.0210261	-0.0619874	-0.268349	0.266992	0.465132	0.831863	0.787837	-0.0211147	0.694944	-0.716058
B4E2X5	B4E2X5	Guanine nucleotide binding protein (G protein), alpha inhibiting activity polypeptide 2, isoform CRA_c OS=Homo sapiens GN=GNAI2 PE=2 SV=1	0.0210261	-0.0619874	-0.268349	0.266992	0.465132	0.831863	0.787837	-0.0211147	0.694944	-0.716058
Q8TF09	DLRB2	Dynein light chain roadblock-type 2 OS=Homo sapiens GN=DYNLRB2 PE=1 SV=1	0.0244649	-0.0557737	-0.386938	-0.00409586	0.274362	0.842856	0.583864	-0.148936	0.567027	-0.715963
Q9NP97	DLRB1	Dynein light chain roadblock-type 1 OS=Homo sapiens GN=DYNLRB1 PE=1 SV=3	0.0244649	-0.0557737	-0.386938	-0.00409586	0.274362	0.842856	0.583864	-0.148936	0.567027	-0.715963
B1AKR6	B1AKR6	Dynein, light chain, roadblock-type 1 OS=Homo sapiens GN=DYNLRB1 PE=4 SV=1	0.0244649	-0.0557737	-0.386938	-0.00409586	0.274362	0.842856	0.583864	-0.148936	0.567027	-0.715963
Q96B60	Q96B60	5'-nucleotidase, ecto (CD73) OS=Homo sapiens GN=NT5E PE=2 SV=1	0.034765	0.245517	0.518637	0.644787	1.21868	0.827983	1.49242	0.469647	1.17969	-0.710046
Q6ZN40	Q6ZN40	Tropomyosin 1 (Alpha), isoform CRA_f OS=Homo sapiens GN=TPM1 PE=2 SV=1	0.016023	0.151808	0.11945	-0.194383	0.67778	0.842965	0.453767	0.0256251	0.65817	-0.632545
P62873	GBB1	Guanine nucleotide-binding protein G(I)/G(S)/G(T) subunit beta-1 OS=Homo sapiens GN=GNB1 PE=1 SV=3	0.00937151	0.183985	0.223873	0.566809	0.842133	1.00177	0.979058	0.324889	0.940986	-0.616097
O14950	ML12B	Myosin regulatory light chain 12B OS=Homo sapiens GN=MYL12B PE=1 SV=2	0.0178219	0.720012	0.516259	0.662257	1.49838	1.1009	1.06452	0.632843	1.22127	-0.588423
P19105	ML12A	Myosin regulatory light chain 12A OS=Homo sapiens GN=MYL12A PE=1 SV=2	0.0178219	0.720012	0.516259	0.662257	1.49838	1.1009	1.06452	0.632843	1.22127	-0.588423
Q7Z3B1	NEGR1	Neuronal growth regulator 1 OS=Homo sapiens GN=NEGR1 PE=1 SV=3	0.0222203	-0.166543	-0.0386618	0.247586	0.397164	0.642771	0.745286	0.014127	0.595074	-0.580947
Q8N440	Q8N440	NEGR1 protein OS=Homo sapiens GN=NEGR1 PE=2 SV=1	0.0222203	-0.166543	-0.0386618	0.247586	0.397164	0.642771	0.745286	0.014127	0.595074	-0.580947
Q08043	ACTN3	Alpha-actinin-3 OS=Homo sapiens GN=ACTN3 PE=1 SV=2	0.0482044	0.226779	0.0904122	-0.32388	0.345234	0.675261	0.607537	-0.00222944	0.542677	-0.544907
P61981	1433G	14-3-3 protein gamma OS=Homo sapiens GN=YWHAG PE=1 SV=2	0.043394	1.45086	1.00667	1.13831	1.64476	1.57434	1.9935	1.19861	1.73753	-0.538921
P30837	AL1B1	Aldehyde dehydrogenase X, mitochondrial OS=Homo sapiens GN=ALDH1B1 PE=1 SV=3	0.0445384	-0.0229537	0.184217	0.598265	0.755302	0.814761	0.78008	0.253176	0.783381	-0.530205
O43854	EDIL3	EGF-like repeat and discoidin I-like domain-containing protein 3 OS=Homo sapiens GN=EDIL3 PE=1 SV=1	0.0302575	-0.0720612	-0.0260082	0.0835429	0.81987	0.41358	0.324179	-0.00484217	0.51921	-0.524052
P24844	MYL9	Myosin regulatory light polypeptide 9 OS=Homo sapiens GN=MYL9 PE=1 SV=4	0.0345001	0.828729	0.685267	0.54354	1.43129	0.958791	1.1746	0.685846	1.18823	-0.502381
Q9UMS6	2|SYNP2	Isoform 2 of Synaptopodin-2 OS=Homo sapiens GN=SYNPO2	0.0416556	-0.0677387	0.157308	0.0111104	0.73791	0.631457	0.228067	0.0335598	0.532478	-0.498918
O00469	2|PLOD2	Isoform 2 of Procollagen-lysine,2-oxoglutarate 5-dioxygenase 2 OS=Homo sapiens GN=PLOD2	0.0256472	0.269442	0.428959	0.233446	0.593841	0.961323	0.684893	0.310616	0.746686	-0.43607
P11021	GRP78	78 kDa glucose-regulated protein OS=Homo sapiens GN=HSPA5 PE=1 SV=2	0.0306597	0.344547	0.313802	0.63175	0.819573	1.00766	0.734606	0.430033	0.853947	-0.423914
Q14247	SRC8	Src substrate cortactin OS=Homo sapiens GN=CTTN PE=1 SV=2	0.0274333	0.563357	0.472749	0.372692	0.898372	1.06798	0.68961	0.469599	0.88532	-0.415721
Q96H99	Q96H99	Cortactin OS=Homo sapiens GN=CTTN PE=2 SV=1	0.0274333	0.563357	0.472749	0.372692	0.898372	1.06798	0.68961	0.469599	0.88532	-0.415721
Q12805	FBLN3	EGF-containing fibulin-like extracellular matrix protein 1 OS=Homo sapiens GN=EFEMP1 PE=1 SV=2	0.00592989	0.434902	0.472644	0.621817	0.922867	0.813073	0.968409	0.509788	0.90145	-0.391662
P35579	MYH9	Myosin-9 OS=Homo sapiens GN=MYH9 PE=1 SV=4	0.0216857	1.5262	1.5081	1.34871	1.89451	1.69985	1.71348	1.46101	1.76928	-0.308273
Q92804	2|RBP56	Isoform Short of TATA-binding protein-associated factor 2N OS=Homo sapiens GN=TAF15	0.0192388	0.371428	0.333586	0.145237	0.572762	0.521487	0.635173	0.283417	0.576474	-0.293057
Q9Y2D5	6|AKAP2	Isoform 4 of A-kinase anchor protein 2 OS=Homo sapiens GN=AKAP2	0.0178942	0.0282663	0.103814	0.0956832	0.27123	0.469533	0.283441	0.0759211	0.341401	-0.26548
P13667	PDIA4	Protein disulfide-isomerase A4 OS=Homo sapiens GN=PDIA4 PE=1 SV=2	0.011387	0.471678	0.395833	0.543403	0.750406	0.796869	0.655558	0.470305	0.734278	-0.263973
Q9Y3I0	RTCB	tRNA-splicing ligase RtcB homolog OS=Homo sapiens GN=C22orf28 PE=1 SV=1	0.031893	0.373803	0.333546	0.570191	0.175782	0.194881	0.195194	0.425847	0.188619	0.237227
P59190	2|RAB15	Isoform 2 of Ras-related protein Rab-15 OS=Homo sapiens GN=RAB15	0.0351888	0.502986	0.367739	0.443743	0.0467269	0.254549	-0.15422	0.438156	0.0490184	0.389138
P61006	RAB8A	Ras-related protein Rab-8A OS=Homo sapiens GN=RAB8A PE=1 SV=1	0.0351888	0.502986	0.367739	0.443743	0.0467269	0.254549	-0.15422	0.438156	0.0490184	0.389138
Q15286	RAB35	Ras-related protein Rab-35 OS=Homo sapiens GN=RAB35 PE=1 SV=1	0.0351888	0.502986	0.367739	0.443743	0.0467269	0.254549	-0.15422	0.438156	0.0490184	0.389138
Q92930	RAB8B	Ras-related protein Rab-8B OS=Homo sapiens GN=RAB8B PE=1 SV=2	0.0351888	0.502986	0.367739	0.443743	0.0467269	0.254549	-0.15422	0.438156	0.0490184	0.389138
B4E390	B4E390	RAB35, member RAS oncogene family, isoform CRA_b OS=Homo sapiens GN=RAB35 PE=2 SV=1	0.0351888	0.502986	0.367739	0.443743	0.0467269	0.254549	-0.15422	0.438156	0.0490184	0.389138
P61026	RAB10	Ras-related protein Rab-10 OS=Homo sapiens GN=RAB10 PE=1 SV=1	0.0224106	0.502986	0.367739	0.545583	0.0467269	0.254549	-0.0714577	0.472103	0.076606	0.395497
Q92928	RAB1C	Putative Ras-related protein Rab-1C OS=Homo sapiens GN=RAB1C PE=5 SV=2	0.0130124	0.729157	0.8424	0.816332	0.352824	0.253947	0.557332	0.795963	0.388034	0.407929
Q9H0U4	RAB1B	Ras-related protein Rab-1B OS=Homo sapiens GN=RAB1B PE=1 SV=1	0.0130124	0.729157	0.8424	0.816332	0.352824	0.253947	0.557332	0.795963	0.388034	0.407929
P62820	RAB1A	Ras-related protein Rab-1A OS=Homo sapiens GN=RAB1A PE=1 SV=3	0.0198188	0.728021	0.834736	0.816332	0.35396	0.178106	0.557332	0.79303	0.363133	0.429897
Q02218	ODO1	2-oxoglutarate dehydrogenase, mitochondrial OS=Homo sapiens GN=OGDH PE=1 SV=3	0.0498926	0.374923	0.811056	0.826269	0.136384	0.17184	0.351454	0.670749	0.219893	0.450857
P46821	MAP1B	Microtubule-associated protein 1B OS=Homo sapiens GN=MAP1B PE=1 SV=2	0.0468507	0.766855	0.722957	0.905793	0.0359691	0.612108	0.231704	0.798535	0.29326	0.505275
Q15149	2|PLEC	Isoform 2 of Plectin OS=Homo sapiens GN=PLEC	0.0218977	0.655607	0.916223	0.97482	0.0154735	0.405112	0.380621	0.848884	0.267069	0.581815
P15153	RAC2	Ras-related C3 botulinum toxin substrate 2 OS=Homo sapiens GN=RAC2 PE=1 SV=1	0.0343381	0.717703	1.04404	0.760796	0.297739	0.502924	-0.0244631	0.840847	0.258733	0.582113
P60763	RAC3	Ras-related C3 botulinum toxin substrate 3 OS=Homo sapiens GN=RAC3 PE=1 SV=1	0.0343381	0.717703	1.04404	0.760796	0.297739	0.502924	-0.0244631	0.840847	0.258733	0.582113
B1AH78	B1AH78	Ras-related C3 botulinum toxin substrate 2 (Rho family, small GTP binding protein Rac2) (Fragment) OS=Homo sapiens GN=RAC2 PE=3 SV=1	0.0343381	0.717703	1.04404	0.760796	0.297739	0.502924	-0.0244631	0.840847	0.258733	0.582113
Q9Y265	RUVB1	RuvB-like 1 OS=Homo sapiens GN=RUVBL1 PE=1 SV=1	0.0283174	1.02375	0.994623	0.782875	0.523958	0.0346956	0.485022	0.933749	0.347892	0.585856
P12109	CO6A1	Collagen alpha-1(VI) chain OS=Homo sapiens GN=COL6A1 PE=1 SV=3	0.0123744	0.511712	0.53532	0.843017	-0.161836	0.115459	0.110481	0.630016	0.0213682	0.608648
P60953	CDC42	Cell division control protein 42 homolog OS=Homo sapiens GN=CDC42 PE=1 SV=2	0.0204065	0.765102	0.946834	0.874481	0.250339	0.516114	-0.0263266	0.862139	0.246709	0.61543
P61106	RAB14	Ras-related protein Rab-14 OS=Homo sapiens GN=RAB14 PE=1 SV=4	0.0452244	0.715454	0.895984	1.048	0.501231	-0.116303	0.414502	0.886478	0.266477	0.620001
P35998	PRS7	26S protease regulatory subunit 7 OS=Homo sapiens GN=PSMC2 PE=1 SV=3	0.0455799	0.712356	0.397856	0.173934	0.0811375	-0.46876	-0.250822	0.428049	-0.212815	0.640864
Q9Y230	RUVB2	RuvB-like 2 OS=Homo sapiens GN=RUVBL2 PE=1 SV=3	0.0072796	0.679997	0.874153	0.611922	0.057955	0.248959	-0.110812	0.722024	0.0653673	0.656657
P84095	RHOG	Rho-related GTP-binding protein RhoG OS=Homo sapiens GN=RHOG PE=1 SV=1	0.0227679	0.69654	1.0339	0.962992	0.236919	0.502924	-0.0212561	0.897811	0.239529	0.658282
Q58FF7	H90B3	Putative heat shock protein HSP 90-beta-3 OS=Homo sapiens GN=HSP90AB3P PE=5 SV=1	0.000536673	0.619461	0.60019	0.527491	-0.0207921	-0.222576	-0.0621296	0.582381	-0.101832	0.684213
P14866	HNRPL	Heterogeneous nuclear ribonucleoprotein L OS=Homo sapiens GN=HNRNPL PE=1 SV=2	0.00961434	0.703882	0.527149	0.384182	-0.38274	-0.0439066	-0.0276557	0.538404	-0.151434	0.689838
Q9NZM1	MYOF	Myoferlin OS=Homo sapiens GN=MYOF PE=1 SV=1	0.0413548	0.145967	0.901734	0.692089	-0.0888792	-0.0153982	-0.26546	0.57993	-0.123246	0.703176
P20742	PZP	Pregnancy zone protein OS=Homo sapiens GN=PZP PE=1 SV=4	0.0217522	0.33364	0.723313	0.723236	0.00987635	0.0500214	-0.398856	0.593396	-0.112986	0.706382
P49368	TCPG	T-complex protein 1 subunit gamma OS=Homo sapiens GN=CCT3 PE=1 SV=4	0.0197464	0.897301	0.53198	0.547453	-0.296112	0.219834	-0.124978	0.658911	-0.0670855	0.725997
Q16891	IMMT	Mitochondrial inner membrane protein OS=Homo sapiens GN=IMMT PE=1 SV=1	0.0327015	0.108684	0.821467	0.663856	-0.307073	-0.063926	-0.224852	0.531335	-0.198617	0.729952
Q13228	SBP1	Selenium-binding protein 1 OS=Homo sapiens GN=SELENBP1 PE=1 SV=2	0.0393735	0.919934	0.384379	0.558428	-0.335011	0.254422	-0.333553	0.620914	-0.138047	0.758961
P42765	THIM	3-ketoacyl-CoA thiolase, mitochondrial OS=Homo sapiens GN=ACAA2 PE=1 SV=2	0.0112276	0.879964	0.766226	0.991404	0.281711	-0.200522	0.268049	0.879198	0.116413	0.762785
P40939	ECHA	Trifunctional enzyme subunit alpha, mitochondrial OS=Homo sapiens GN=HADHA PE=1 SV=2	0.0244252	1.57195	1.58796	2.13454	0.997792	0.806385	1.19905	1.76482	1.00107	0.763743
P13804	ETFA	Electron transfer flavoprotein subunit alpha, mitochondrial OS=Homo sapiens GN=ETFA PE=1 SV=1	0.0137489	0.611899	0.688411	0.872667	0.283971	-0.173276	-0.249563	0.724326	-0.0462895	0.770615
O14558	HSPB6	Heat shock protein beta-6 OS=Homo sapiens GN=HSPB6 PE=1 SV=2	0.0426791	1.18946	0.798054	1.00321	0.144283	0.657168	-0.184793	0.996907	0.205553	0.791354
P17661	DESM	Desmin OS=Homo sapiens GN=DES PE=1 SV=3	0.00198693	0.731698	0.879002	1.07167	0.0314456	0.194989	0.0329939	0.894124	0.0864761	0.807648
P55010	IF5	Eukaryotic translation initiation factor 5 OS=Homo sapiens GN=EIF5 PE=1 SV=2	0.0157007	1.04947	0.519543	0.596228	-0.19342	0.138956	-0.219485	0.721745	-0.0913162	0.813062
P05388	RLA0	60S acidic ribosomal protein P0 OS=Homo sapiens GN=RPLP0 PE=1 SV=1	0.00786306	0.458226	0.392349	0.424761	-0.591924	-0.536551	-0.0685021	0.425112	-0.398992	0.824104
Q8NHW5	RLA0L	60S acidic ribosomal protein P0-like OS=Homo sapiens GN=RPLP0P6 PE=5 SV=1	0.00786306	0.458226	0.392349	0.424761	-0.591924	-0.536551	-0.0685021	0.425112	-0.398992	0.824104
Q3B7A4	Q3B7A4	RPLP0 protein OS=Homo sapiens GN=RPLP0 PE=2 SV=1	0.00786306	0.458226	0.392349	0.424761	-0.591924	-0.536551	-0.0685021	0.425112	-0.398992	0.824104
P61019	RAB2A	Ras-related protein Rab-2A OS=Homo sapiens GN=RAB2A PE=1 SV=1	0.00540357	0.477516	0.411793	0.500874	-0.457691	-0.571848	-0.0771282	0.463394	-0.368889	0.832284
Q96I99	SUCB2	Succinyl-CoA ligase [GDP-forming] subunit beta, mitochondrial OS=Homo sapiens GN=SUCLG2 PE=1 SV=2	0.016852	1.687	1.15239	1.41049	0.779338	0.30066	0.666259	1.41663	0.582086	0.834545
P27635	RL10	60S ribosomal protein L10 OS=Homo sapiens GN=RPL10 PE=1 SV=4	0.033212	0.5119	0.534006	0.886138	-0.535664	-0.297406	0.251349	0.644015	-0.193907	0.837922
P62753	RS6	40S ribosomal protein S6 OS=Homo sapiens GN=RPS6 PE=1 SV=1	0.0130651	0.427973	0.826879	0.575979	-0.50775	-0.24035	0.047476	0.610277	-0.233541	0.843818
A2A3R5	A2A3R5	40S ribosomal protein S6 OS=Homo sapiens GN=RPS6 PE=3 SV=1	0.0130651	0.427973	0.826879	0.575979	-0.50775	-0.24035	0.047476	0.610277	-0.233541	0.843818
P52565	GDIR1	Rho GDP-dissociation inhibitor 1 OS=Homo sapiens GN=ARHGDIA PE=1 SV=3	0.013909	0.975499	0.677684	0.347479	-0.130321	-0.388027	-0.0673198	0.666887	-0.195223	0.86211
F5H7U0	F5H7U0	6-phosphogluconate dehydrogenase, decarboxylating OS=Homo sapiens GN=PGD PE=3 SV=1	0.0499252	1.55413	0.972057	0.564904	0.395001	0.119276	-0.0344524	1.03037	0.159941	0.870424
P15880	RS2	40S ribosomal protein S2 OS=Homo sapiens GN=RPS2 PE=1 SV=2	0.00742368	0.872618	0.791506	1.01567	-0.260109	0.294822	-0.222984	0.893266	-0.0627572	0.956023
P01023	A2MG	Alpha-2-macroglobulin OS=Homo sapiens GN=A2M PE=1 SV=3	0.0350241	0.249942	1.02259	0.86924	-0.258303	0.0876496	-0.614481	0.713926	-0.261711	0.975637
Q04828	AK1C1	Aldo-keto reductase family 1 member C1 OS=Homo sapiens GN=AKR1C1 PE=1 SV=1	0.0373139	2.20825	1.57742	1.47119	0.789924	0.37676	1.14553	1.75228	0.77074	0.981545
P52895	AK1C2	Aldo-keto reductase family 1 member C2 OS=Homo sapiens GN=AKR1C2 PE=1 SV=3	0.0299743	2.20825	1.53818	1.53821	0.811647	0.415556	1.10043	1.76155	0.775878	0.985672
P04843	RPN1	Dolichyl-diphosphooligosaccharide--protein glycosyltransferase subunit 1 OS=Homo sapiens GN=RPN1 PE=1 SV=1	0.0207484	0.55822	0.326102	0.920258	-0.514858	-0.672701	0.00738462	0.601527	-0.393392	0.994918
P30050	RL12	60S ribosomal protein L12 OS=Homo sapiens GN=RPL12 PE=1 SV=1	0.00120213	0.925633	0.638983	0.828845	-0.0623822	-0.367212	-0.184834	0.79782	-0.204809	1.00263
P28838	AMPL	Cytosol aminopeptidase OS=Homo sapiens GN=LAP3 PE=1 SV=3	0.00873658	0.877572	1.17147	0.402529	-0.325126	-0.299163	-0.192757	0.817189	-0.272349	1.08954
P49748	ACADV	Very long-chain specific acyl-CoA dehydrogenase, mitochondrial OS=Homo sapiens GN=ACADVL PE=1 SV=1	0.0239703	0.452492	0.901642	1.21976	0.0384428	-0.6747	-0.101512	0.857965	-0.245923	1.10389
Q15067	ACOX1	Peroxisomal acyl-coenzyme A oxidase 1 OS=Homo sapiens GN=ACOX1 PE=1 SV=3	0.0158584	0.908623	1.71065	1.57969	0.395888	0.0552212	0.426103	1.39965	0.292404	1.10725
P42330	AK1C3	Aldo-keto reductase family 1 member C3 OS=Homo sapiens GN=AKR1C3 PE=1 SV=4	0.00457013	1.44617	1.22367	1.22106	0.418438	0.233963	-0.207758	1.29697	0.148215	1.14875
P51659	DHB4	Peroxisomal multifunctional enzyme type 2 OS=Homo sapiens GN=HSD17B4 PE=1 SV=3	0.0280424	0.400632	0.461984	1.15352	-0.6006	-0.0694147	-1.02577	0.672044	-0.56526	1.2373
P49411	EFTU	Elongation factor Tu, mitochondrial OS=Homo sapiens GN=TUFM PE=1 SV=2	0.0202137	0.995708	0.917592	1.49823	-0.416919	-0.595347	0.407494	1.13718	-0.20159	1.33877
P02511	CRYAB	Alpha-crystallin B chain OS=Homo sapiens GN=CRYAB PE=1 SV=2	0.0222744	1.73073	0.703102	0.580409	-0.570487	-0.284107	-0.248479	1.00475	-0.367691	1.37244
P17516	AK1C4	Aldo-keto reductase family 1 member C4 OS=Homo sapiens GN=AKR1C4 PE=1 SV=3	0.0203377	1.44993	0.65837	0.593221	-0.0471347	-0.586133	-0.979255	0.900506	-0.537507	1.43801
P00325	ADH1B	Alcohol dehydrogenase 1B OS=Homo sapiens GN=ADH1B PE=1 SV=2	0.0118771	0.904748	-0.215596	0.335063	-1.20696	-0.964903	-1.16561	0.341405	-1.11249	1.4539
Q9Y2Q3	GSTK1	Glutathione S-transferase kappa 1 OS=Homo sapiens GN=GSTK1 PE=1 SV=3	0.00499079	0.556532	0.806785	0.897684	-0.81241	-1.05332	-0.245587	0.753667	-0.703771	1.45744
Q96Q06	PLIN4	Perilipin-4 OS=Homo sapiens GN=PLIN4 PE=2 SV=2	0.0471533	1.07209	1.39949	1.36494	-0.864251	0.80556	-0.637174	1.27884	-0.231955	1.5108
P55084	ECHB	Trifunctional enzyme subunit beta, mitochondrial OS=Homo sapiens GN=HADHB PE=1 SV=3	0.0315271	0.689941	2.23845	1.15004	-0.416286	0.0759028	-0.271178	1.35948	-0.203854	1.56333
P15090	FABP4	Fatty acid-binding protein, adipocyte OS=Homo sapiens GN=FABP4 PE=1 SV=3	0.0169591	2.38754	1.47543	1.99084	0.524807	-0.203986	0.804275	1.95127	0.375032	1.57624
P10620	MGST1	Microsomal glutathione S-transferase 1 OS=Homo sapiens GN=MGST1 PE=1 SV=1	0.000295856	0.886852	0.706458	0.588114	-0.75178	-1.07828	-0.783009	0.727142	-0.871024	1.59817
P60903	S10AA	Protein S100-A10 OS=Homo sapiens GN=S100A10 PE=1 SV=2	0.0271664	0.832422	1.01036	0.103057	-0.519302	-1.12267	-2.21251	0.648613	-1.28483	1.93344
P49327	FAS	Fatty acid synthase OS=Homo sapiens GN=FASN PE=1 SV=3	0.00542339	1.45609	0.869506	0.513548	-2.08422	-0.954155	-1.26384	0.94638	-1.43407	2.38045
P21695	GPDA	Glycerol-3-phosphate dehydrogenase [NAD+], cytoplasmic OS=Homo sapiens GN=GPD1 PE=1 SV=4	0.00145036	1.28305	0.591129	0.844425	-1.24743	-1.7335	-2.17779	0.906201	-1.71957	2.62577

## Sheet: downregulated by miR-221 (46)
ID	NAME	GENE NAME	Annotation	p-value	T1ToSTD	T2ToSTD	T3ToSTD	U1ToSTD	U2ToSTD	U3ToSTD	Tave	Uave	T-U
sp|Q08043	ACTN3	ACTN3	Alpha-actinin-3 OS=Homo sapiens GN=ACTN3 PE=1 SV=2	0.0482044	0.226779	0.0904122	-0.32388	0.345234	0.675261	0.607537	-0.00222944	0.542677	-0.544907
sp|P30837	AL1B1	ALDH1B1	Aldehyde dehydrogenase X, mitochondrial OS=Homo sapiens GN=ALDH1B1 PE=1 SV=3	0.0445384	-0.0229537	0.184217	0.598265	0.755302	0.814761	0.78008	0.253176	0.783381	-0.530205
sp|P15848	ARSB	ARSB	Arylsulfatase B OS=Homo sapiens GN=ARSB PE=1 SV=1	0.0247848	-0.493766	0.021752	-0.268451	0.32505	0.843304	0.402436	-0.246822	0.523597	-0.770418
tr|Q8N322	Q8N322	ARSB	Arylsulfatase B OS=Homo sapiens GN=ARSB PE=2 SV=1	0.0211296	-0.360418	-0.111596	-0.262073	0.626428	0.985236	0.221173	-0.244696	0.610946	-0.855641
tr|B1AKR6	B1AKR6	B1AKR6	Dynein, light chain, roadblock-type 1 OS=Homo sapiens GN=DYNLRB1 PE=4 SV=1	0.0244649	-0.0557737	-0.386938	-0.00409586	0.274362	0.842856	0.583864	-0.148936	0.567027	-0.715963
sp|P51911	CNN1	CNN1	Calponin-1 OS=Homo sapiens GN=CNN1 PE=1 SV=2	0.00117644	0.059649	-0.284191	-0.358117	1.18979	1.05115	0.915923	-0.19422	1.05229	-1.24651
tr|Q96H99	Q96H99	CTTN	Cortactin OS=Homo sapiens GN=CTTN PE=2 SV=1	0.0274333	0.563357	0.472749	0.372692	0.898372	1.06798	0.68961	0.469599	0.88532	-0.415721
sp|Q14247	SRC8	CTTN	Src substrate cortactin OS=Homo sapiens GN=CTTN PE=1 SV=2	0.0274333	0.563357	0.472749	0.372692	0.898372	1.06798	0.68961	0.469599	0.88532	-0.415721
tr|D9YZV2	D9YZV2	D9YZV2	Tropomyosin 1 (Alpha) isoform 5 OS=Homo sapiens GN=TPM1 PE=3 SV=1	0.0345384	0.124844	0.0886346	-0.207181	0.64512	1.19138	0.463252	0.00209905	0.766582	-0.764483
sp|Q9NP97	DLRB1	DYNLRB1	Dynein light chain roadblock-type 1 OS=Homo sapiens GN=DYNLRB1 PE=1 SV=3	0.0244649	-0.0557737	-0.386938	-0.00409586	0.274362	0.842856	0.583864	-0.148936	0.567027	-0.715963
sp|Q8TF09	DLRB2	DYNLRB2	Dynein light chain roadblock-type 2 OS=Homo sapiens GN=DYNLRB2 PE=1 SV=1	0.0244649	-0.0557737	-0.386938	-0.00409586	0.274362	0.842856	0.583864	-0.148936	0.567027	-0.715963
sp|O43854	EDIL3	EDIL3	EGF-like repeat and discoidin I-like domain-containing protein 3 OS=Homo sapiens GN=EDIL3 PE=1 SV=1	0.0302575	-0.0720612	-0.0260082	0.0835429	0.81987	0.41358	0.324179	-0.00484217	0.51921	-0.524052
sp|Q12805	FBLN3	EFEMP1	EGF-containing fibulin-like extracellular matrix protein 1 OS=Homo sapiens GN=EFEMP1 PE=1 SV=2	0.00592989	0.434902	0.472644	0.621817	0.922867	0.813073	0.968409	0.509788	0.90145	-0.391662
tr|B3KTZ0	B3KTZ0	GNAI2	Guanine nucleotide binding protein (G protein), alpha inhibiting activity polypeptide 2, isoform CRA_e OS=Homo sapiens GN=GNAI2 PE=2 SV=1	0.0210261	-0.0619874	-0.268349	0.266992	0.465132	0.831863	0.787837	-0.0211147	0.694944	-0.716058
tr|B4DYA0	B4DYA0	GNAI2	Guanine nucleotide binding protein (G protein), alpha inhibiting activity polypeptide 2, isoform CRA_f OS=Homo sapiens GN=GNAI2 PE=2 SV=1	0.0210261	-0.0619874	-0.268349	0.266992	0.465132	0.831863	0.787837	-0.0211147	0.694944	-0.716058
tr|B4E2X5	B4E2X5	GNAI2	Guanine nucleotide binding protein (G protein), alpha inhibiting activity polypeptide 2, isoform CRA_c OS=Homo sapiens GN=GNAI2 PE=2 SV=1	0.0210261	-0.0619874	-0.268349	0.266992	0.465132	0.831863	0.787837	-0.0211147	0.694944	-0.716058
sp|P04899	GNAI2	GNAI2	Guanine nucleotide-binding protein G(i) subunit alpha-2 OS=Homo sapiens GN=GNAI2 PE=1 SV=3	0.029686	-0.0619874	-0.268349	0.266992	0.465132	1.06799	0.726542	-0.0211147	0.753222	-0.774337
sp|P62873	GBB1	GNB1	Guanine nucleotide-binding protein G(I)/G(S)/G(T) subunit beta-1 OS=Homo sapiens GN=GNB1 PE=1 SV=3	0.00937151	0.183985	0.223873	0.566809	0.842133	1.00177	0.979058	0.324889	0.940986	-0.616097
sp|P11021	GRP78	HSPA5	78 kDa glucose-regulated protein OS=Homo sapiens GN=HSPA5 PE=1 SV=2	0.0306597	0.344547	0.313802	0.63175	0.819573	1.00766	0.734606	0.430033	0.853947	-0.423914
sp|Q16270	IBP7	IGFBP7	Insulin-like growth factor-binding protein 7 OS=Homo sapiens GN=IGFBP7 PE=1 SV=1	0.0171282	-0.0327589	-0.0547502	-0.196741	1.11873	1.69646	0.618972	-0.0947502	1.14472	-1.23947
sp|P06756	ITAV	ITGAV	Integrin alpha-V OS=Homo sapiens GN=ITGAV PE=1 SV=2	0.0477268	0.359329	0.293833	0.321715	1.39788	0.979288	2.53441	0.324959	1.63719	-1.31223
sp|P20700	LMNB1	LMNB1	Lamin-B1 OS=Homo sapiens GN=LMNB1 PE=1 SV=2	0.0485628	-0.162635	0.171991	0.582938	0.851522	1.583	0.87385	0.197431	1.10279	-0.905359
sp|Q8WWI1	LMO7	LMO7	Isoform 3 of LIM domain only protein 7 OS=Homo sapiens GN=LMO7	0.00920913	0.00901609	-0.22984	0.236335	0.817484	1.58755	1.36188	0.00517047	1.25564	-1.25047
sp|P35579	MYH9	MYH9	Myosin-9 OS=Homo sapiens GN=MYH9 PE=1 SV=4	0.0216857	1.5262	1.5081	1.34871	1.89451	1.69985	1.71348	1.46101	1.76928	-0.308273
sp|P19105	ML12A	MYL12A	Myosin regulatory light chain 12A OS=Homo sapiens GN=MYL12A PE=1 SV=2	0.0178219	0.720012	0.516259	0.662257	1.49838	1.1009	1.06452	0.632843	1.22127	-0.588423
sp|O14950	ML12B	MYL12B	Myosin regulatory light chain 12B OS=Homo sapiens GN=MYL12B PE=1 SV=2	0.0178219	0.720012	0.516259	0.662257	1.49838	1.1009	1.06452	0.632843	1.22127	-0.588423
sp|P24844	MYL9	MYL9	Myosin regulatory light polypeptide 9 OS=Homo sapiens GN=MYL9 PE=1 SV=4	0.0345001	0.828729	0.685267	0.54354	1.43129	0.958791	1.1746	0.685846	1.18823	-0.502381
sp|Q7Z3B1	NEGR1	NEGR1	Neuronal growth regulator 1 OS=Homo sapiens GN=NEGR1 PE=1 SV=3	0.0222203	-0.166543	-0.0386618	0.247586	0.397164	0.642771	0.745286	0.014127	0.595074	-0.580947
tr|Q8N440	Q8N440	NEGR1	NEGR1 protein OS=Homo sapiens GN=NEGR1 PE=2 SV=1	0.0222203	-0.166543	-0.0386618	0.247586	0.397164	0.642771	0.745286	0.014127	0.595074	-0.580947
tr|Q96B60	Q96B60	NT5E	5'-nucleotidase, ecto (CD73) OS=Homo sapiens GN=NT5E PE=2 SV=1	0.034765	0.245517	0.518637	0.644787	1.21868	0.827983	1.49242	0.469647	1.17969	-0.710046
sp|Q9Y2D5	AKAP2	PALM2	Isoform 4 of A-kinase anchor protein 2 OS=Homo sapiens GN=AKAP2	0.0178942	0.0282663	0.103814	0.0956832	0.27123	0.469533	0.283441	0.0759211	0.341401	-0.26548
sp|P13667	PDIA4	PDIA4	Protein disulfide-isomerase A4 OS=Homo sapiens GN=PDIA4 PE=1 SV=2	0.011387	0.471678	0.395833	0.543403	0.750406	0.796869	0.655558	0.470305	0.734278	-0.263973
sp|Q9Y646	PGCP	PGCP	Plasma glutamate carboxypeptidase OS=Homo sapiens GN=PGCP PE=1 SV=1	0.00602741	-0.285716	-0.171074	0.0139139	0.665183	1.25551	0.802423	-0.147625	0.907705	-1.05533
sp|Q6UXB8	PI16	PI16	Peptidase inhibitor 16 OS=Homo sapiens GN=PI16 PE=1 SV=1	0.047374	0.0759378	-0.123667	0.508218	1.45017	1.18047	0.563185	0.153496	1.06461	-0.91111
sp|O00469	PLOD2	PLOD2	Isoform 2 of Procollagen-lysine,2-oxoglutarate 5-dioxygenase 2 OS=Homo sapiens GN=PLOD2	0.0256472	0.269442	0.428959	0.233446	0.593841	0.961323	0.684893	0.310616	0.746686	-0.43607
sp|P28074	PSB5	PSMB5	Proteasome subunit beta type-5 OS=Homo sapiens GN=PSMB5 PE=1 SV=3	0.00683604	-0.0035209	-0.407266	-0.272883	0.651854	0.835778	0.422302	-0.22789	0.636645	-0.864535
sp|Q9UMS6	SYNP2	SYNPO2	Isoform 2 of Synaptopodin-2 OS=Homo sapiens GN=SYNPO2	0.0416556	-0.0677387	0.157308	0.0111104	0.73791	0.631457	0.228067	0.0335598	0.532478	-0.498918
sp|Q92804	RBP56	TAF15	Isoform Short of TATA-binding protein-associated factor 2N OS=Homo sapiens GN=TAF15	0.0192388	0.371428	0.333586	0.145237	0.572762	0.521487	0.635173	0.283417	0.576474	-0.293057
sp|P07996	TSP1	THBS1	Thrombospondin-1 OS=Homo sapiens GN=THBS1 PE=1 SV=2	0.00726118	2.17829	1.84346	2.08061	3.27849	2.70885	3.02788	2.03412	3.00507	-0.97095
sp|O60784	TOM1	TOM1	Target of Myb protein 1 OS=Homo sapiens GN=TOM1 PE=1 SV=2	0.0432695	-0.795	0.0685163	-1.13627	0.52024	1.2422	0.337959	-0.620918	0.700133	-1.32105
tr|Q6ZN40	Q6ZN40	TPM1	Tropomyosin 1 (Alpha), isoform CRA_f OS=Homo sapiens GN=TPM1 PE=2 SV=1	0.016023	0.151808	0.11945	-0.194383	0.67778	0.842965	0.453767	0.0256251	0.65817	-0.632545
sp|P09493	TPM1	TPM1	Isoform 3 of Tropomyosin alpha-1 chain OS=Homo sapiens GN=TPM1	0.0129792	0.151808	0.0383203	-0.194383	0.672318	1.05624	0.569236	-0.00141834	0.76593	-0.767349
tr|Q5TCU3	Q5TCU3	TPM2	Tropomyosin 2 (Beta) OS=Homo sapiens GN=TPM2 PE=2 SV=1	0.00898029	0.339973	0.4475	-0.0192589	1.17018	1.26574	0.894012	0.256071	1.10998	-0.853906
tr|Q5TCU8	Q5TCU8	TPM2	Tropomyosin 2 (Beta) OS=Homo sapiens GN=TPM2 PE=2 SV=1	0.0194076	0.0914343	0.089596	-0.207181	0.716737	1.11629	0.493718	-0.00871691	0.775581	-0.784298
sp|P07951	TPM2	TPM2	Isoform 2 of Tropomyosin beta chain OS=Homo sapiens GN=TPM2	0.00613302	0.339973	0.373725	-0.0677846	1.1767	1.26844	0.938802	0.215305	1.12798	-0.912677
sp|P61981	1433G	YWHAG	14-3-3 protein gamma OS=Homo sapiens GN=YWHAG PE=1 SV=2	0.043394	1.45086	1.00667	1.13831	1.64476	1.57434	1.9935	1.19861	1.73753	-0.538921

## Sheet: upregulated by miR-221 (69)
ID	NAME	GENE NAME	Annotation	p-value	T1ToSTD	T2ToSTD	T3ToSTD	U1ToSTD	U2ToSTD	U3ToSTD	Tave	Uave	T-U
sp|P01023	A2MG	A2M	Alpha-2-macroglobulin OS=Homo sapiens GN=A2M PE=1 SV=3	0.0350241	0.249942	1.02259	0.86924	-0.258303	0.0876496	-0.614481	0.713926	-0.261711	0.975637
sp|P42765	THIM	ACAA2	3-ketoacyl-CoA thiolase, mitochondrial OS=Homo sapiens GN=ACAA2 PE=1 SV=2	0.0112276	0.879964	0.766226	0.991404	0.281711	-0.200522	0.268049	0.879198	0.116413	0.762785
sp|P49748	ACADV	ACADVL	Very long-chain specific acyl-CoA dehydrogenase, mitochondrial OS=Homo sapiens GN=ACADVL PE=1 SV=1	0.0239703	0.452492	0.901642	1.21976	0.0384428	-0.6747	-0.101512	0.857965	-0.245923	1.10389
sp|Q15067	ACOX1	ACOX1	Peroxisomal acyl-coenzyme A oxidase 1 OS=Homo sapiens GN=ACOX1 PE=1 SV=3	0.0158584	0.908623	1.71065	1.57969	0.395888	0.0552212	0.426103	1.39965	0.292404	1.10725
sp|P00325	ADH1B	ADH1B	Alcohol dehydrogenase 1B OS=Homo sapiens GN=ADH1B PE=1 SV=2	0.0118771	0.904748	-0.215596	0.335063	-1.20696	-0.964903	-1.16561	0.341405	-1.11249	1.4539
sp|Q04828	AK1C1	AKR1C1	Aldo-keto reductase family 1 member C1 OS=Homo sapiens GN=AKR1C1 PE=1 SV=1	0.0373139	2.20825	1.57742	1.47119	0.789924	0.37676	1.14553	1.75228	0.77074	0.981545
sp|P52895	AK1C2	AKR1C2	Aldo-keto reductase family 1 member C2 OS=Homo sapiens GN=AKR1C2 PE=1 SV=3	0.0299743	2.20825	1.53818	1.53821	0.811647	0.415556	1.10043	1.76155	0.775878	0.985672
sp|P42330	AK1C3	AKR1C3	Aldo-keto reductase family 1 member C3 OS=Homo sapiens GN=AKR1C3 PE=1 SV=4	0.00457013	1.44617	1.22367	1.22106	0.418438	0.233963	-0.207758	1.29697	0.148215	1.14875
sp|P17516	AK1C4	AKR1C4	Aldo-keto reductase family 1 member C4 OS=Homo sapiens GN=AKR1C4 PE=1 SV=3	0.0203377	1.44993	0.65837	0.593221	-0.0471347	-0.586133	-0.979255	0.900506	-0.537507	1.43801
sp|P52565	GDIR1	ARHGDIA	Rho GDP-dissociation inhibitor 1 OS=Homo sapiens GN=ARHGDIA PE=1 SV=3	0.013909	0.975499	0.677684	0.347479	-0.130321	-0.388027	-0.0673198	0.666887	-0.195223	0.86211
sp|Q9Y3I0	RTCB	C22orf28	tRNA-splicing ligase RtcB homolog OS=Homo sapiens GN=C22orf28 PE=1 SV=1	0.031893	0.373803	0.333546	0.570191	0.175782	0.194881	0.195194	0.425847	0.188619	0.237227
sp|P49368	TCPG	CCT3	T-complex protein 1 subunit gamma OS=Homo sapiens GN=CCT3 PE=1 SV=4	0.0197464	0.897301	0.53198	0.547453	-0.296112	0.219834	-0.124978	0.658911	-0.0670855	0.725997
sp|P60953	CDC42	CDC42	Cell division control protein 42 homolog OS=Homo sapiens GN=CDC42 PE=1 SV=2	0.0204065	0.765102	0.946834	0.874481	0.250339	0.516114	-0.0263266	0.862139	0.246709	0.61543
sp|P12109	CO6A1	COL6A1	Collagen alpha-1(VI) chain OS=Homo sapiens GN=COL6A1 PE=1 SV=3	0.0123744	0.511712	0.53532	0.843017	-0.161836	0.115459	0.110481	0.630016	0.0213682	0.608648
sp|P02511	CRYAB	CRYAB	Alpha-crystallin B chain OS=Homo sapiens GN=CRYAB PE=1 SV=2	0.0222744	1.73073	0.703102	0.580409	-0.570487	-0.284107	-0.248479	1.00475	-0.367691	1.37244
sp|P17661	DESM	DES	Desmin OS=Homo sapiens GN=DES PE=1 SV=3	0.00198693	0.731698	0.879002	1.07167	0.0314456	0.194989	0.0329939	0.894124	0.0864761	0.807648
sp|P55010	IF5	EIF5	Eukaryotic translation initiation factor 5 OS=Homo sapiens GN=EIF5 PE=1 SV=2	0.0157007	1.04947	0.519543	0.596228	-0.19342	0.138956	-0.219485	0.721745	-0.0913162	0.813062
sp|P13804	ETFA	ETFA	Electron transfer flavoprotein subunit alpha, mitochondrial OS=Homo sapiens GN=ETFA PE=1 SV=1	0.0137489	0.611899	0.688411	0.872667	0.283971	-0.173276	-0.249563	0.724326	-0.0462895	0.770615
sp|P15090	FABP4	FABP4	Fatty acid-binding protein, adipocyte OS=Homo sapiens GN=FABP4 PE=1 SV=3	0.0169591	2.38754	1.47543	1.99084	0.524807	-0.203986	0.804275	1.95127	0.375032	1.57624
sp|P49327	FAS	FASN	Fatty acid synthase OS=Homo sapiens GN=FASN PE=1 SV=3	0.00542339	1.45609	0.869506	0.513548	-2.08422	-0.954155	-1.26384	0.94638	-1.43407	2.38045
sp|P21695	GPDA	GPD1	Glycerol-3-phosphate dehydrogenase [NAD+], cytoplasmic OS=Homo sapiens GN=GPD1 PE=1 SV=4	0.00145036	1.28305	0.591129	0.844425	-1.24743	-1.7335	-2.17779	0.906201	-1.71957	2.62577
sp|Q9Y2Q3	GSTK1	GSTK1	Glutathione S-transferase kappa 1 OS=Homo sapiens GN=GSTK1 PE=1 SV=3	0.00499079	0.556532	0.806785	0.897684	-0.81241	-1.05332	-0.245587	0.753667	-0.703771	1.45744
sp|P40939	ECHA	HADHA	Trifunctional enzyme subunit alpha, mitochondrial OS=Homo sapiens GN=HADHA PE=1 SV=2	0.0244252	1.57195	1.58796	2.13454	0.997792	0.806385	1.19905	1.76482	1.00107	0.763743
sp|P55084	ECHB	HADHB	Trifunctional enzyme subunit beta, mitochondrial OS=Homo sapiens GN=HADHB PE=1 SV=3	0.0315271	0.689941	2.23845	1.15004	-0.416286	0.0759028	-0.271178	1.35948	-0.203854	1.56333
sp|P14866	HNRPL	HNRNPL	Heterogeneous nuclear ribonucleoprotein L OS=Homo sapiens GN=HNRNPL PE=1 SV=2	0.00961434	0.703882	0.527149	0.384182	-0.38274	-0.0439066	-0.0276557	0.538404	-0.151434	0.689838
sp|P51659	DHB4	HSD17B4	Peroxisomal multifunctional enzyme type 2 OS=Homo sapiens GN=HSD17B4 PE=1 SV=3	0.0280424	0.400632	0.461984	1.15352	-0.6006	-0.0694147	-1.02577	0.672044	-0.56526	1.2373
sp|Q58FF7	H90B3	HSP90AB3P	Putative heat shock protein HSP 90-beta-3 OS=Homo sapiens GN=HSP90AB3P PE=5 SV=1	0.000536673	0.619461	0.60019	0.527491	-0.0207921	-0.222576	-0.0621296	0.582381	-0.101832	0.684213
sp|O14558	HSPB6	HSPB6	Heat shock protein beta-6 OS=Homo sapiens GN=HSPB6 PE=1 SV=2	0.0426791	1.18946	0.798054	1.00321	0.144283	0.657168	-0.184793	0.996907	0.205553	0.791354
sp|Q16891	IMMT	IMMT	Mitochondrial inner membrane protein OS=Homo sapiens GN=IMMT PE=1 SV=1	0.0327015	0.108684	0.821467	0.663856	-0.307073	-0.063926	-0.224852	0.531335	-0.198617	0.729952
sp|P28838	AMPL	LAP3	Cytosol aminopeptidase OS=Homo sapiens GN=LAP3 PE=1 SV=3	0.00873658	0.877572	1.17147	0.402529	-0.325126	-0.299163	-0.192757	0.817189	-0.272349	1.08954
sp|P46821	MAP1B	MAP1B	Microtubule-associated protein 1B OS=Homo sapiens GN=MAP1B PE=1 SV=2	0.0468507	0.766855	0.722957	0.905793	0.0359691	0.612108	0.231704	0.798535	0.29326	0.505275
sp|P10620	MGST1	MGST1	Microsomal glutathione S-transferase 1 OS=Homo sapiens GN=MGST1 PE=1 SV=1	0.000295856	0.886852	0.706458	0.588114	-0.75178	-1.07828	-0.783009	0.727142	-0.871024	1.59817
sp|Q9NZM1	MYOF	MYOF	Myoferlin OS=Homo sapiens GN=MYOF PE=1 SV=1	0.0413548	0.145967	0.901734	0.692089	-0.0888792	-0.0153982	-0.26546	0.57993	-0.123246	0.703176
sp|Q02218	ODO1	OGDH	2-oxoglutarate dehydrogenase, mitochondrial OS=Homo sapiens GN=OGDH PE=1 SV=3	0.0498926	0.374923	0.811056	0.826269	0.136384	0.17184	0.351454	0.670749	0.219893	0.450857
tr|F5H7U0	F5H7U0	PGD	6-phosphogluconate dehydrogenase, decarboxylating OS=Homo sapiens GN=PGD PE=3 SV=1	0.0499252	1.55413	0.972057	0.564904	0.395001	0.119276	-0.0344524	1.03037	0.159941	0.870424
sp|Q15149	PLEC	PLEC	Isoform 2 of Plectin OS=Homo sapiens GN=PLEC	0.0218977	0.655607	0.916223	0.97482	0.0154735	0.405112	0.380621	0.848884	0.267069	0.581815
sp|Q96Q06	PLIN4	PLIN4	Perilipin-4 OS=Homo sapiens GN=PLIN4 PE=2 SV=2	0.0471533	1.07209	1.39949	1.36494	-0.864251	0.80556	-0.637174	1.27884	-0.231955	1.5108
sp|P35998	PRS7	PSMC2	26S protease regulatory subunit 7 OS=Homo sapiens GN=PSMC2 PE=1 SV=3	0.0455799	0.712356	0.397856	0.173934	0.0811375	-0.46876	-0.250822	0.428049	-0.212815	0.640864
sp|P20742	PZP	PZP	Pregnancy zone protein OS=Homo sapiens GN=PZP PE=1 SV=4	0.0217522	0.33364	0.723313	0.723236	0.00987635	0.0500214	-0.398856	0.593396	-0.112986	0.706382
sp|P61026	RAB10	RAB10	Ras-related protein Rab-10 OS=Homo sapiens GN=RAB10 PE=1 SV=1	0.0224106	0.502986	0.367739	0.545583	0.0467269	0.254549	-0.0714577	0.472103	0.076606	0.395497
sp|P61106	RAB14	RAB14	Ras-related protein Rab-14 OS=Homo sapiens GN=RAB14 PE=1 SV=4	0.0452244	0.715454	0.895984	1.048	0.501231	-0.116303	0.414502	0.886478	0.266477	0.620001
sp|P59190	RAB15	RAB15	Isoform 2 of Ras-related protein Rab-15 OS=Homo sapiens GN=RAB15	0.0351888	0.502986	0.367739	0.443743	0.0467269	0.254549	-0.15422	0.438156	0.0490184	0.389138
sp|P62820	RAB1A	RAB1A	Ras-related protein Rab-1A OS=Homo sapiens GN=RAB1A PE=1 SV=3	0.0198188	0.728021	0.834736	0.816332	0.35396	0.178106	0.557332	0.79303	0.363133	0.429897
sp|Q9H0U4	RAB1B	RAB1B	Ras-related protein Rab-1B OS=Homo sapiens GN=RAB1B PE=1 SV=1	0.0130124	0.729157	0.8424	0.816332	0.352824	0.253947	0.557332	0.795963	0.388034	0.407929
sp|Q92928	RAB1C	RAB1C	Putative Ras-related protein Rab-1C OS=Homo sapiens GN=RAB1C PE=5 SV=2	0.0130124	0.729157	0.8424	0.816332	0.352824	0.253947	0.557332	0.795963	0.388034	0.407929
sp|P61019	RAB2A	RAB2A	Ras-related protein Rab-2A OS=Homo sapiens GN=RAB2A PE=1 SV=1	0.00540357	0.477516	0.411793	0.500874	-0.457691	-0.571848	-0.0771282	0.463394	-0.368889	0.832284
tr|B4E390	B4E390	RAB35	RAB35, member RAS oncogene family, isoform CRA_b OS=Homo sapiens GN=RAB35 PE=2 SV=1	0.0351888	0.502986	0.367739	0.443743	0.0467269	0.254549	-0.15422	0.438156	0.0490184	0.389138
sp|Q15286	RAB35	RAB35	Ras-related protein Rab-35 OS=Homo sapiens GN=RAB35 PE=1 SV=1	0.0351888	0.502986	0.367739	0.443743	0.0467269	0.254549	-0.15422	0.438156	0.0490184	0.389138
sp|P61006	RAB8A	RAB8A	Ras-related protein Rab-8A OS=Homo sapiens GN=RAB8A PE=1 SV=1	0.0351888	0.502986	0.367739	0.443743	0.0467269	0.254549	-0.15422	0.438156	0.0490184	0.389138
sp|Q92930	RAB8B	RAB8B	Ras-related protein Rab-8B OS=Homo sapiens GN=RAB8B PE=1 SV=2	0.0351888	0.502986	0.367739	0.443743	0.0467269	0.254549	-0.15422	0.438156	0.0490184	0.389138
tr|B1AH78	B1AH78	RAC2	Ras-related C3 botulinum toxin substrate 2 (Rho family, small GTP binding protein Rac2) (Fragment) OS=Homo sapiens GN=RAC2 PE=3 SV=1	0.0343381	0.717703	1.04404	0.760796	0.297739	0.502924	-0.0244631	0.840847	0.258733	0.582113
sp|P15153	RAC2	RAC2	Ras-related C3 botulinum toxin substrate 2 OS=Homo sapiens GN=RAC2 PE=1 SV=1	0.0343381	0.717703	1.04404	0.760796	0.297739	0.502924	-0.0244631	0.840847	0.258733	0.582113
sp|P60763	RAC3	RAC3	Ras-related C3 botulinum toxin substrate 3 OS=Homo sapiens GN=RAC3 PE=1 SV=1	0.0343381	0.717703	1.04404	0.760796	0.297739	0.502924	-0.0244631	0.840847	0.258733	0.582113
sp|P84095	RHOG	RHOG	Rho-related GTP-binding protein RhoG OS=Homo sapiens GN=RHOG PE=1 SV=1	0.0227679	0.69654	1.0339	0.962992	0.236919	0.502924	-0.0212561	0.897811	0.239529	0.658282
sp|P27635	RL10	RPL10	60S ribosomal protein L10 OS=Homo sapiens GN=RPL10 PE=1 SV=4	0.033212	0.5119	0.534006	0.886138	-0.535664	-0.297406	0.251349	0.644015	-0.193907	0.837922
sp|P30050	RL12	RPL12	60S ribosomal protein L12 OS=Homo sapiens GN=RPL12 PE=1 SV=1	0.00120213	0.925633	0.638983	0.828845	-0.0623822	-0.367212	-0.184834	0.79782	-0.204809	1.00263
tr|Q3B7A4	Q3B7A4	RPLP0	RPLP0 protein OS=Homo sapiens GN=RPLP0 PE=2 SV=1	0.00786306	0.458226	0.392349	0.424761	-0.591924	-0.536551	-0.0685021	0.425112	-0.398992	0.824104
sp|P05388	RLA0	RPLP0	60S acidic ribosomal protein P0 OS=Homo sapiens GN=RPLP0 PE=1 SV=1	0.00786306	0.458226	0.392349	0.424761	-0.591924	-0.536551	-0.0685021	0.425112	-0.398992	0.824104
sp|Q8NHW5	RLA0L	RPLP0P6	60S acidic ribosomal protein P0-like OS=Homo sapiens GN=RPLP0P6 PE=5 SV=1	0.00786306	0.458226	0.392349	0.424761	-0.591924	-0.536551	-0.0685021	0.425112	-0.398992	0.824104
sp|P04843	RPN1	RPN1	Dolichyl-diphosphooligosaccharide--protein glycosyltransferase subunit 1 OS=Homo sapiens GN=RPN1 PE=1 SV=1	0.0207484	0.55822	0.326102	0.920258	-0.514858	-0.672701	0.00738462	0.601527	-0.393392	0.994918
sp|P15880	RS2	RPS2	40S ribosomal protein S2 OS=Homo sapiens GN=RPS2 PE=1 SV=2	0.00742368	0.872618	0.791506	1.01567	-0.260109	0.294822	-0.222984	0.893266	-0.0627572	0.956023
tr|A2A3R5	A2A3R5	RPS6	40S ribosomal protein S6 OS=Homo sapiens GN=RPS6 PE=3 SV=1	0.0130651	0.427973	0.826879	0.575979	-0.50775	-0.24035	0.047476	0.610277	-0.233541	0.843818
sp|P62753	RS6	RPS6	40S ribosomal protein S6 OS=Homo sapiens GN=RPS6 PE=1 SV=1	0.0130651	0.427973	0.826879	0.575979	-0.50775	-0.24035	0.047476	0.610277	-0.233541	0.843818
sp|Q9Y265	RUVB1	RUVBL1	RuvB-like 1 OS=Homo sapiens GN=RUVBL1 PE=1 SV=1	0.0283174	1.02375	0.994623	0.782875	0.523958	0.0346956	0.485022	0.933749	0.347892	0.585856
sp|Q9Y230	RUVB2	RUVBL2	RuvB-like 2 OS=Homo sapiens GN=RUVBL2 PE=1 SV=3	0.0072796	0.679997	0.874153	0.611922	0.057955	0.248959	-0.110812	0.722024	0.0653673	0.656657
sp|P60903	S10AA	S100A10	Protein S100-A10 OS=Homo sapiens GN=S100A10 PE=1 SV=2	0.0271664	0.832422	1.01036	0.103057	-0.519302	-1.12267	-2.21251	0.648613	-1.28483	1.93344
sp|Q13228	SBP1	SELENBP1	Selenium-binding protein 1 OS=Homo sapiens GN=SELENBP1 PE=1 SV=2	0.0393735	0.919934	0.384379	0.558428	-0.335011	0.254422	-0.333553	0.620914	-0.138047	0.758961
sp|Q96I99	SUCB2	SUCLG2	Succinyl-CoA ligase [GDP-forming] subunit beta, mitochondrial OS=Homo sapiens GN=SUCLG2 PE=1 SV=2	0.016852	1.687	1.15239	1.41049	0.779338	0.30066	0.666259	1.41663	0.582086	0.834545
sp|P49411	EFTU	TUFM	Elongation factor Tu, mitochondrial OS=Homo sapiens GN=TUFM PE=1 SV=2	0.0202137	0.995708	0.917592	1.49823	-0.416919	-0.595347	0.407494	1.13718	-0.20159	1.33877

## Sheet: diff exp predicted miR-221 targ
ID	Source	Confidence	ID	Symbol	Log Ratio	Pathway
hsa-miR-221	TargetScan Human	Moderate (predicted)	P55010	EIF5	0.813	EIF2 Signaling
hsa-miR-221	TargetScan Human	High (predicted)	P04899	GNAI2	-0.774	Androgen Signaling Axonal Guidance Signaling Breast Cancer Regulation by Stathmin1 CCR3 Signaling in Eosinophils CCR5 Signaling in Macrophages CREB Signaling in Neurons CXCR4 Signaling Cardiac Hypertrophy Signaling Chemokine Signaling Corticotropin Releasing Hormone Signaling Dopamine-DARPP32 Feedback in cAMP Signaling Endothelin-1 Signaling Ephrin B Signaling Ephrin Receptor Signaling G Beta Gam…
hsa-miR-221	TargetScan Human	High (predicted)	P62820	RAB1A	0.430
hsa-miR-221	TargetScan Human	High (predicted)	P07996	THBS1	-0.971	Bladder Cancer Signaling Inhibition of Angiogenesis by TSP1 p53 Signaling
hsa-miR-221	TargetScan Human	High (predicted)	P61981	YWHAG	-0.539	14-3-3-mediated Signaling Cell Cycle: G2/M DNA Damage Checkpoint Regulation ERK/MAPK Signaling ERK5 Signaling IGF-1 Signaling Myc Mediated Apoptosis Signaling PI3K/AKT Signaling Protein Kinase A Signaling p70S6K Signaling

## Sheet: predicted common regulators
ESM Table 3: Proteins upregulated or downregulated in miR-221 mimic transfected cells compared with controls
© 2000-2012 Ingenuity Systems, Inc. All rights reserved.
Upstream Regulator	Log Ratio	Molecule Type	Predicted Activation State	Activation z-score	Notes	p-value of overlap	Target molecules in dataset
MYCN		transcription regulator		1.913		1.05E-10	CDC42,IGFBP7,MYH9 (includes EG:17886),MYL12A,PDIA4,RPL10,RPL12,RPLP0,RPS2,RPS6,S100A10,TPM1 (includes EG:396366),TUFM
INSR		kinase		1.782		6.24E-10	ACAA2,ACADVL,ARHGDIA,DES,ETFA,FABP4,FASN,GNB1,HADHA,HADHB,HSD17B4,OGDH,RUVBL2,TPM2
pirinixic acid		chemical toxicant	Activated	3.268		2.57E-09	ACAA2,ACADVL,ACOX1,AKR1C3,CCT3,FABP4,FASN,GPD1,HADHA,HADHB,HSD17B4,PLIN4,PSMB5,PSMC2,TUFM
bezafibrate		chemical drug	Activated	2.184		1.19E-08	ACADVL,ACOX1,FABP4,FASN,HADHA,HADHB,HSD17B4,HSPA5
TP53 (includes EG:22059)		transcription regulator		0.692		4.05E-08	A2M,ACAA2,ACADVL,CDC42,CNN1 (includes EG:1264),CRYAB,ETFA,FABP4,FASN,HADHA,HADHB,IGFBP7,MYH9 (includes EG:17886),MYL9,MYOF,PLOD2,RAB8A,RPN1,RUVBL2,THBS1,TOM1 (includes EG:10043),TPM2
PPARA		ligand-dependent nuclear receptor	Activated	3.108		6.44E-08	ACAA2,ACADVL,ACOX1,ARHGDIA,FABP4,FASN,GPD1,GSTK1,HADHA,HADHB,HSD17B4,MGST1,SELENBP1
dinoprost		chemical - endogenous mammalian		0.254		7.10E-08	AKR1C1/AKR1C2,AKR1C4,FABP4,MGST1,PDIA4,THBS1,YWHAG
PPARG		ligand-dependent nuclear receptor	Activated	2.601		1.62E-07	ACAA2,ACOX1,FABP4,FASN,GPD1,HADHA,HADHB,IGFBP7,MGST1,PLIN4,TPM2,YWHAG
mannose		chemical - endogenous mammalian		1.000		2.52E-07	FASN,GPD1,HSPA5,THBS1
ACOX1	1.107	enzyme		0.113		4.57E-07	ACADVL,ACOX1,AKR1C4,FABP4,FASN,HSPA5,RPL12,SELENBP1
dexamethasone		chemical drug		0.992		5.04E-07	ACTN3,AKR1C1/AKR1C2,AKR1C3,AKR1C4,ALDH1B1,ARHGDIA,COL6A1,CRYAB,EIF5,ETFA,FABP4,GNAI2,HADHB,HSPA5,ITGAV,PLEC,PLOD2,RPLP0,RPS6,S100A10,THBS1,TPM1 (includes EG:396366),TPM2
PLIN1		other				5.06E-07	ACADVL,FASN,HADHA,HADHB
sirolimus		chemical drug	Inhibited	-2.172		9.01E-07	ACADVL,DES,EIF5,FASN,GPD1,HSPA5,RPL10,RPLP0,RPS2,RPS6,TUFM
mono-(2-ethylhexyl)phthalate		chemical toxicant	Activated	2.777	bias	9.34E-07	ACADVL,ACOX1,FABP4,FASN,GPD1,HADHA,OGDH,SUCLG2
PD98059		chemical - kinase inhibitor		-1.257		1.27E-06	C22orf28,EIF5,FABP4,FASN,HADHB,HSPA5,ITGAV,PLEC,RPS2,RPS6,S100A10,SELENBP1,THBS1
HNF4A		transcription regulator				1.40E-06	ACAA2,ACOX1,ADH1B,AKR1C1/AKR1C2,AKR1C3,AKR1C4,C22orf28,EIF5,GSTK1,HADHA,HADHB,HSD17B4,HSPA5,IMMT,MGST1,OGDH,PSMB5,PZP,RAB10,RAB1B,RAB2A,RPL10,RPL12,RPS6,RUVBL2,TOM1 (includes EG:10043)
KLF15		transcription regulator	Activated	2.233		1.41E-06	ACADVL,ACOX1,FASN,HADHA,HADHB
HRAS		enzyme		1.633		2.63E-06	A2M,AKAP2/PALM2-AKAP2,CDC42,CNN1 (includes EG:1264),EFEMP1,ITGAV,MYL12B,MYL9,PLOD2,RPS6,THBS1,TOM1 (includes EG:10043),TPM2
TGFB1		growth factor	Inhibited	-2.297		4.71E-06	ACAA2,AKR1C1/AKR1C2,CNN1 (includes EG:1264),COL6A1,CPQ,CTTN,DES,HSPA5,IGFBP7,ITGAV,MYH9 (includes EG:17886),MYL12B,MYOF,NT5E,PLOD2,RAB1A,S100A10,THBS1,TPM1 (includes EG:396366),TPM2,TUFM
GW501516		chemical drug				4.74E-06	ACAA2,COL6A1,FASN,GPD1,HADHA,THBS1
oleoyl-estrone		chemical drug		-1.980		5.17E-06	ACADVL,FABP4,FASN,PSMC2
PRL		cytokine		-0.508		6.41E-06	A2M,AKR1C3,AKR1C4,DES,MGST1,PDIA4,RHOG,YWHAG
ciprofibrate		chemical drug		1.418		7.20E-06	ACOX1,AKR1C4,FABP4,HADHA,HSD17B4,RPL12,SELENBP1
fenofibrate		chemical drug	Activated	2.565		1.36E-05	ACAA2,ACADVL,ACOX1,FABP4,FASN,HADHA,HADHB,HSD17B4
nitrofurantoin		chemical drug		-1.890		1.66E-05	A2M,ACADVL,ACOX1,HSD17B4,HSPA5,S100A10,SELENBP1
AHR		ligand-dependent nuclear receptor		-0.277		1.83E-05	A2M,ACOX1,ALDH1B1,CDC42,COL6A1,EFEMP1,FABP4,HSPA5,THBS1
galactose		chemical - endogenous mammalian				2.37E-05	FASN,GPD1,THBS1
RXRA		ligand-dependent nuclear receptor		1.927		2.38E-05	ACOX1,CRYAB,FABP4,FASN,GPD1,HADHA,HADHB,HSD17B4
GTF2I		transcription regulator				4.86E-05	HSPA5,PDIA4,THBS1
IGF1R		transmembrane receptor				4.98E-05	CDC42,DES,FASN,HADHA,HSPA5,RAB1A,TPM2
RXRB		ligand-dependent nuclear receptor				5.60E-05	ACOX1,CRYAB,FABP4,FASN
CEBPA		transcription regulator	Activated	2.187		6.34E-05	A2M,ADH1B,AKR1C1/AKR1C2,AKR1C3,FABP4,FASN,HSPA5,PGD,PLOD2
troglitazone		chemical drug		0.880		6.90E-05	ACOX1,CRYAB,EIF5,FABP4,FASN,GPD1,HSPA5,PLEC,PLIN4
Tropomyosin		group				7.00E-05	TPM1 (includes EG:396366),TPM2
NR4A1		ligand-dependent nuclear receptor				7.35E-05	AKR1C1/AKR1C2,AKR1C4,FASN,GPD1,NT5E
dihydrotestosterone		chemical - endogenous mammalian		0.152		7.77E-05	ACADVL,COL6A1,FABP4,FASN,GPD1,IGFBP7,RAB2A,RPL12,SELENBP1,THBS1
PTEN		phosphatase		-1.819		9.02E-05	ACOX1,AKR1C3,ARHGDIA,FABP4,FASN,PLEC,RPS6,THBS1,TOM1 (includes EG:10043)
KRAS		enzyme		1.348		9.15E-05	CRYAB,EFEMP1,EIF5,HADHB,HSPA5,RPS6,THBS1,TPM2
beta-estradiol		chemical - endogenous mammalian		-1.073		9.19E-05	A2M,ACAA2,ACADVL,ACOX1,CNN1 (includes EG:1264),CTTN,FABP4,FASN,GNB1,HSD17B4,HSPA5,ITGAV,LMO7,MGST1,MYOF,PDIA4,RAB2A,SELENBP1,THBS1
bexarotene		chemical drug		1.387		1.00E-04	ACOX1,AKR1C1/AKR1C2,AKR1C3,FABP4,PLOD2
RTN4 (includes EG:57142)		other		0.000		1.02E-04	ARHGDIA,LAP3,TPM2,YWHAG
FOS		transcription regulator		-1.000		1.12E-04	A2M,ACOX1,AKR1C3,FABP4,HSPA5,MGST1,MYH9 (includes EG:17886),RPLP0,RPS6,SELENBP1
methotrexate		chemical drug		1.633		1.24E-04	ACAA2,ACADVL,ACOX1,FASN,HADHA,HADHB,HSD17B4
ZAP70		kinase		0.000	bias	1.38E-04	EDIL3,ETFA,PLEC,TAF15
ZBED1		enzyme				1.39E-04	RPL12,RPS6
[truncated: 422 more rows]
